# Supplementary material for: Ir/Brønsted acid dual-catalyzed asymmetric synthesis of bisbenzannulated spiroketals and spiroaminals from isochroman ketals
Source: Royal Society of Chemistry journal article supplement (doi:10.1039/d4qo01402b), 2024-01-01
Supplement: d4qo01402b1.pdf [file d4qo01402b1.pdf]

## Supporting Information

### Ir/Brønsted acid dual-catalyzed asymmetric synthesis of bisbenzannulated spiroketals and spiroaminals from isochroman ketals

Yang Chen,<sup>‡a</sup> Hui Yan,<sup>‡a</sup> Hanliang Zheng,<sup>\*b</sup> Wei-Ping Deng,<sup>b</sup> Zhong Li,<sup>a</sup> Wu-Lin Yang<sup>\*a</sup>

<sup>a</sup>Shanghai Key Laboratory of Chemical Biology & School of Pharmacy, East China University of Science and Technology, 130 Meilong Road, Shanghai 200237.

<sup>b</sup>Key Laboratory of the Ministry of Education for Advanced Catalysis Materials, College of Chemistry and Materials Science, Zhejiang Normal University, 688 Yingbin Road, Jinhua 321004.

<sup>‡</sup>These authors contributed equally: Yang Chen, Hui Yan.

E-mail: hanliang@zjnu.edu.cn, yangwl@ecust.edu.cn.

### Table of Contents

|                                                                                          |     |
|------------------------------------------------------------------------------------------|-----|
| 1. General information .....                                                             | S2  |
| 2. Optimization study.....                                                               | S3  |
| 3. General procedure and characterization data for bisbenzannulated spiroketals 3 .....  | S7  |
| 4. General procedure and characterization data for bisbenzannulated spiroaminals 5 ..... | S22 |
| 5. Gram-scale preparation of bisbenzannulated spiroketal 3a.....                         | S31 |
| 6. Synthetic transformations of bisbenzannulated spiroketal 3a .....                     | S32 |
| 7. <i>In-vitro</i> antifungal activity against four species of pathogenic fungi.....     | S34 |
| 8. Control experiments for mechanism study .....                                         | S36 |
| 9. DFT calculations .....                                                                | S37 |
| 10. References.....                                                                      | S41 |
| 11. <sup>1</sup> H NMR, <sup>13</sup> C NMR and <sup>19</sup> F NMR spectra .....        | S42 |
| 12. HPLC chromatograms .....                                                             | S84 |

## 1. General information

<sup>1</sup>H NMR spectra were recorded on a Bruker DPX 400 MHz spectrometer in CDCl<sub>3</sub>. Chemical shifts are reported in ppm with the internal TMS signal at 0.0 ppm as a standard. The spectra are interpreted as: s, singlet; d, doublet; t, triplet; m, multiplet; dd, double doublet; ddd, double double doublet; ddq, double double quartet; coupling constant(s) *J* are reported in Hz and relative integrations are reported. <sup>13</sup>C NMR (100 MHz) spectrum were recorded on a Bruker DPX 400 MHz spectrometer in CDCl<sub>3</sub>. Chemical shifts are reported in ppm with the internal chloroform signal at 77.16 ppm as a standard; <sup>19</sup>F NMR (376 or 565 MHz) spectra were recorded on a Bruker DPX 400 or 600 MHz spectrometer in CDCl<sub>3</sub> and referenced relative to CFCl<sub>3</sub>. Optical rotations were measured on an AUTOPOL V. Enantiomeric excesses were determined by analysis of HPLC traces, obtained by using Chiralpak AD-H, IA, IB, IC, IF, IG and Chiralcel OD-H, OJ-H, columns with *n*-hexane and ethanol or isopropanol as solvents. (Chiralpak AD-H, IA, IB, IC, IF, IG and Chiralcel OD-H, OJ-H columns were purchased from Daicel Chiral Technologies (China) Co., LTD.) Melting points were obtained in open capillary tubes using SGW X-4 micro melting point apparatus which were uncorrected. High-resolution mass spectra (HRMS) were recorded on a Waters GCT Premier mass spectrometer using EI-TOF (electron ionization-time of flight). Commercially available materials purchased from Adamas-beta and Bidepharm, which were used as received. Solvent was purified according to the procedure from *Purification of Laboratory Chemicals*. [Ir(cod)Cl]<sub>2</sub> purchased from laajoo and Bidepharm. Carreira's ligand (*S*)-**L**,<sup>[1]</sup> substrates isochroman ketals (±)-**1**,<sup>[2]</sup> 2-(1-hydroxyallyl)phenols (±)-**2**,<sup>[3]</sup> and *N*-protected-2-(1-hydroxyallyl)anilines (±)-**4**<sup>[4-6]</sup> were prepared according to the literature procedures.

## 2. Optimization study

### 1) The optimization studies for synthesis of bisbenzannulated spiroketal **3a**

**Table S1:** The dr value of product **3a** along with the course of the reaction.

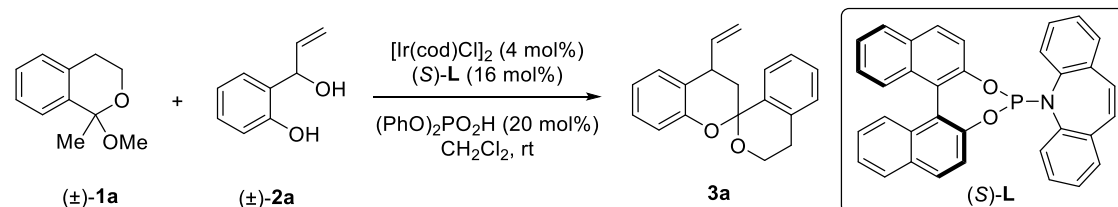

| entry <sup>[a]</sup> | time   | ee (%) <sup>[b]</sup> | dr <sup>[c]</sup> |
|----------------------|--------|-----------------------|-------------------|
| 1                    | 5 min  | 98                    | 3:1               |
| 2                    | 10 min | 98                    | 5:1               |
| 3                    | 30 min | 98                    | 11:1              |
| 4                    | 1 h    | 98                    | 11:1              |
| 5                    | 2 h    | 98                    | 12:1              |
| 6                    | 6 h    | 98                    | 12:1              |
| 7                    | 12 h   | 98                    | 12:1              |
| 8                    | 24 h   | 98                    | 12:1              |
| 9                    | 48 h   | 98                    | 12:1              |

[a] The reaction was carried out with (±)-**1a** (0.20 mmol), (±)-**2a** (0.40 mmol), [Ir(cod)Cl]<sub>2</sub> (4 mol%), (S)-**L** (16 mol%), (PhO)<sub>2</sub>PO<sub>2</sub>H (20 mol%) in dry CH<sub>2</sub>Cl<sub>2</sub> (2.0 mL) at room temperature. [b] Determined by HPLC analysis on a chiral stationary phase. [c] Determined by <sup>1</sup>H NMR analysis and HPLC analysis.

**Table S2:** The dr value of product **3a** along with the course of the reaction by using CPA.

| entry <sup>[a]</sup> | CPA   | time   | ee (%) <sup>[b]</sup> | dr <sup>[c]</sup> |
|----------------------|-------|--------|-----------------------|-------------------|
| 1                    | (R)-A | 5 min  | 96                    | 1:2               |
| 2                    | (R)-A | 10 min | 96                    | 1:1.7             |
| 3                    | (R)-A | 30 min | 96                    | 1:1.5             |
| 4                    | (R)-A | 1 h    | 96                    | 1:1.2             |
| 5                    | (R)-A | 2 h    | 96                    | 1:1.1             |
| 6                    | (R)-A | 12 h   | 96                    | 6:1               |
| 7                    | (R)-A | 24 h   | 96                    | 12:1              |
| 8                    | (R)-A | 48 h   | 96                    | 12:1              |
| 9                    | (S)-A | 5 min  | 96                    | 1:1.2             |
| 10                   | (S)-A | 10 min | 96                    | 1:1.1             |
| 11                   | (S)-A | 30 min | 96                    | 1:1               |
| 12                   | (S)-A | 1 h    | 96                    | 1.1:1             |

|    |                        |      |    |       |
|----|------------------------|------|----|-------|
| 13 | ( <i>S</i> )- <b>A</b> | 2 h  | 96 | 1.6:1 |
| 14 | ( <i>S</i> )- <b>A</b> | 12 h | 96 | 7:1   |
| 15 | ( <i>S</i> )- <b>A</b> | 24 h | 96 | 12:1  |
| 16 | ( <i>S</i> )- <b>A</b> | 48 h | 96 | 12:1  |

[a] The reaction was carried out with ( $\pm$ )-**1a** (0.20 mmol), ( $\pm$ )-**2a** (0.40 mmol), [Ir(cod)Cl]<sub>2</sub> (4 mol%), (*S*)-**L** (16 mol%), **CPA** (0.2 equiv) in dry CH<sub>2</sub>Cl<sub>2</sub> (2.0 mL) at room temperature. [b] Determined by HPLC analysis on a chiral stationary phase. [c] Determined by <sup>1</sup>H NMR analysis and HPLC analysis.

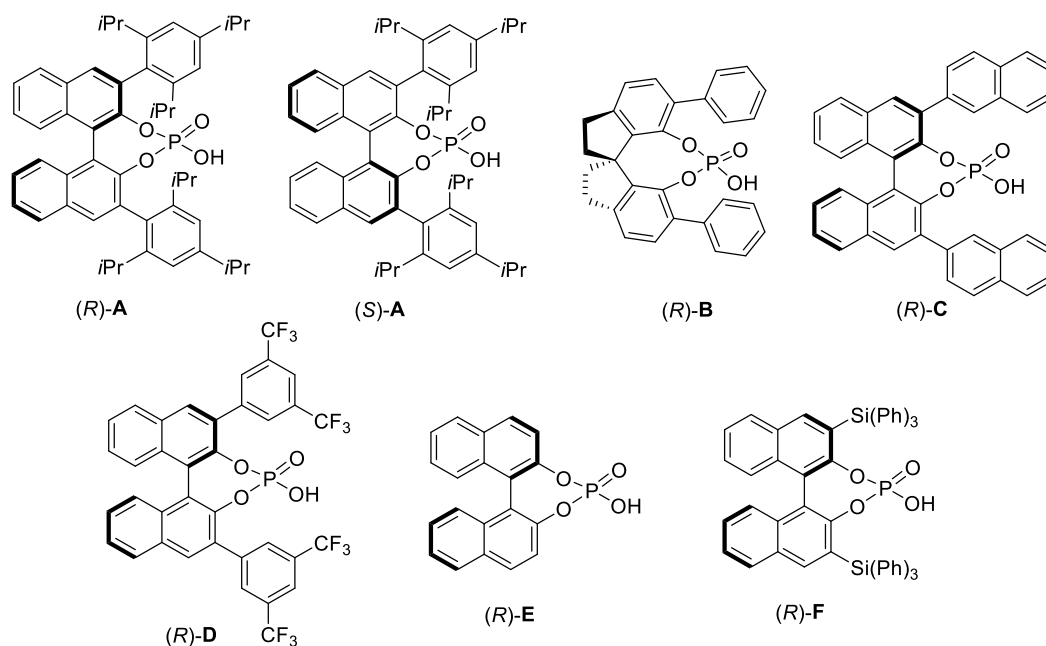

**Table S3:** The screening of various **CPA**.

| entry <sup>[a]</sup> | <b>CPA</b>             | solvent                         | yield (%) <sup>[b]</sup> | ee (%) <sup>[c]</sup> | dr <sup>[d]</sup> |
|----------------------|------------------------|---------------------------------|--------------------------|-----------------------|-------------------|
| 1                    | ( <i>R</i> )- <b>A</b> | CH <sub>2</sub> Cl <sub>2</sub> | 76                       | 96                    | 1:1.5             |
| 2                    | ( <i>S</i> )- <b>A</b> | CH <sub>2</sub> Cl <sub>2</sub> | 86                       | 96                    | 1.6:1             |
| 3                    | ( <i>R</i> )- <b>B</b> | CH <sub>2</sub> Cl <sub>2</sub> | 68                       | 98                    | 1:1.2             |
| 4                    | ( <i>R</i> )- <b>C</b> | CH <sub>2</sub> Cl <sub>2</sub> | 88                       | 98                    | 10:1              |
| 5                    | ( <i>R</i> )- <b>D</b> | CH <sub>2</sub> Cl <sub>2</sub> | 92                       | 97                    | 12:1              |
| 6                    | ( <i>R</i> )- <b>E</b> | CH <sub>2</sub> Cl <sub>2</sub> | 97                       | 98                    | 12:1              |
| 7                    | ( <i>R</i> )- <b>F</b> | CH <sub>2</sub> Cl <sub>2</sub> | 73                       | 95                    | 1:1.1             |
| 8                    | ( <i>R</i> )- <b>A</b> | toluene                         | 32                       | 95                    | 1:1.2             |
| 9                    | ( <i>R</i> )- <b>A</b> | THF                             | 9                        | 99                    | 1:1.2             |

[a] The reaction was carried out with ( $\pm$ )-**1a** (0.20 mmol), ( $\pm$ )-**2a** (0.40 mmol), [Ir(cod)Cl]<sub>2</sub> (4 mol%), (*S*)-**L** (16 mol%), **CPA** (20 mol%) in dry solvent (2.0 mL) at room temperature. [b] Yield of the diastereomeric mixtures. [c] Determined by HPLC analysis on a chiral stationary phase. [d] Determined by <sup>1</sup>H NMR analysis and HPLC analysis.

**Table S4:** The screening of the amount of (PhSO<sub>2</sub>)<sub>2</sub>NH and additives.

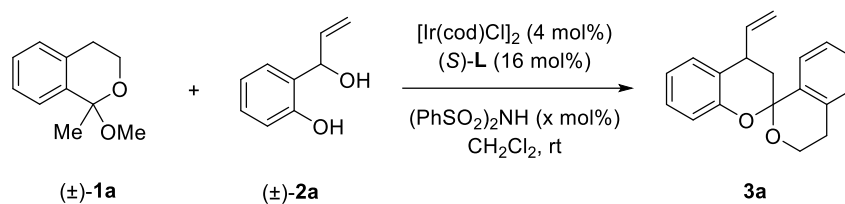

| entry <sup>[a]</sup> | (PhSO <sub>2</sub> ) <sub>2</sub> NH | additive | t (h) | yield (%) <sup>[b]</sup> | ee (%) <sup>[c]</sup> | dr <sup>[d]</sup> |
|----------------------|--------------------------------------|----------|-------|--------------------------|-----------------------|-------------------|
| 1                    | 20 mol%                              | -        | 2     | 99                       | 99                    | 12:1              |
| 2                    | 10 mol%                              | -        | 4     | 99                       | 99                    | 6:1               |
| 3                    | 10 mol%                              | -        | 24    | 99                       | 99                    | 7:1               |
| 4                    | 20 mol%                              | 3Å MS    | 12    | 99                       | 99                    | 6:1               |
| 5                    | 20 mol%                              | 4Å MS    | 12    | 99                       | 99                    | 3:1               |
| 6                    | 20 mol%                              | 5Å MS    | 12    | 99                       | 99                    | 11:1              |

[a] The reaction was carried out with (±)-**1a** (0.20 mmol), (±)-**2a** (0.40 mmol), [Ir(cod)Cl]<sub>2</sub> (4 mol%), (S)-**L** (16 mol%), (PhSO<sub>2</sub>)<sub>2</sub>NH (x mol%), and additive (50.0 mg) in dry CH<sub>2</sub>Cl<sub>2</sub> (2.0 mL) at room temperature. [b] Yield of the diastereomeric mixtures. [c] Determined by HPLC analysis on a chiral stationary phase. [d] Determined by <sup>1</sup>H NMR analysis and HPLC analysis.

## 2) The optimization studies for synthesis of bisbenzannulated spiroaminal **5a**

**Table S5:** The optimization studies for synthesis of bisbenzannulated spiroaminal **5a**.

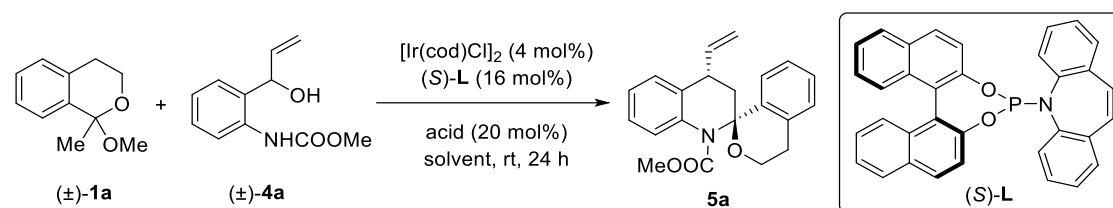

| entry <sup>[a]</sup> | acid                                 | solvent                         | yield (%) <sup>[b]</sup> | ee (%) <sup>[c]</sup> | dr <sup>[d]</sup> |
|----------------------|--------------------------------------|---------------------------------|--------------------------|-----------------------|-------------------|
| 1                    | CF <sub>3</sub> CO <sub>2</sub> H    | CH <sub>2</sub> Cl <sub>2</sub> | 78                       | 99                    | 5:1               |
| 2                    | (PhSO <sub>2</sub> ) <sub>2</sub> NH | CH <sub>2</sub> Cl <sub>2</sub> | 77                       | 98                    | 5:1               |
| 3                    | Zn(OTf) <sub>2</sub>                 | CH <sub>2</sub> Cl <sub>2</sub> | 71                       | 99                    | 5:1               |
| 4                    | Sc(OTf) <sub>3</sub>                 | CH <sub>2</sub> Cl <sub>2</sub> | 75                       | 98                    | 5:1               |
| 5                    | Fe(OTf) <sub>2</sub>                 | CH <sub>2</sub> Cl <sub>2</sub> | 76                       | 98                    | 5:1               |
| 6                    | ( <i>R</i> )- <b>A</b>               | CH <sub>2</sub> Cl <sub>2</sub> | 16                       | 99                    | 5:1               |
| 7                    | ( <i>S</i> )- <b>A</b>               | CH <sub>2</sub> Cl <sub>2</sub> | 31                       | 99                    | 4:1               |
| 8                    | ( <i>R</i> )- <b>D</b>               | CH <sub>2</sub> Cl <sub>2</sub> | 79                       | 97                    | 6:1               |
| 9                    | ( <i>S</i> )- <b>D</b>               | CH <sub>2</sub> Cl <sub>2</sub> | 80                       | 97                    | 6:1               |
| 10                   | ( <i>R</i> )- <b>E</b>               | CH <sub>2</sub> Cl <sub>2</sub> | 74                       | 99                    | 6:1               |
| 11                   | ( <i>S</i> )- <b>E</b>               | CH <sub>2</sub> Cl <sub>2</sub> | 78                       | 99                    | 6:1               |
| 12                   | ( <i>R</i> )- <b>F</b>               | CH <sub>2</sub> Cl <sub>2</sub> | 0                        | -                     | -                 |
| 13                   | ( <i>S</i> )- <b>F</b>               | CH <sub>2</sub> Cl <sub>2</sub> | 0                        | -                     | -                 |
| 14                   | CF <sub>3</sub> CO <sub>2</sub> H    | toluene                         | 72                       | 99                    | 6:1               |
| 15                   | CF <sub>3</sub> CO <sub>2</sub> H    | THF                             | 55                       | 99                    | 5:1               |
| 16                   | CF <sub>3</sub> CO <sub>2</sub> H    | CH <sub>3</sub> CN              | 56                       | 91                    | 6:1               |
| 17                   | CF <sub>3</sub> CO <sub>2</sub> H    | 1,4-dioxane                     | 76                       | 99                    | 5:1               |

|                   |                                   |                                 |    |    |     |
|-------------------|-----------------------------------|---------------------------------|----|----|-----|
| 18                | CF <sub>3</sub> CO <sub>2</sub> H | DCE                             | 78 | 99 | 5:1 |
| 19                | CF <sub>3</sub> CO <sub>2</sub> H | PhCF <sub>3</sub>               | 78 | 99 | 5:1 |
| 20 <sup>[e]</sup> | CF <sub>3</sub> CO <sub>2</sub> H | CH <sub>2</sub> Cl <sub>2</sub> | 76 | 99 | 6:1 |
| 21 <sup>[f]</sup> | CF <sub>3</sub> CO <sub>2</sub> H | CH <sub>2</sub> Cl <sub>2</sub> | 60 | 99 | 6:1 |

[a] The reaction was carried out with (±)-**1a** (0.10 mmol), (±)-**4a** (0.20 mmol), [Ir(cod)Cl]<sub>2</sub> (4 mol%), (*S*)-**L** (16 mol%), acid (20 mol%) in dry solvent (1.0 mL) at room temperature. [b] Yield of the diastereomeric mixtures. [c] Determined by HPLC analysis on a chiral stationary phase. [d] Determined by <sup>1</sup>H NMR analysis and HPLC analysis. [e] [Ir(cod)Cl]<sub>2</sub> (2 mol%) and (*S*)-**L** (8 mol%) were used. [f] [Ir(cod)Cl]<sub>2</sub> (1 mol%) and (*S*)-**L** (4 mol%) were used.

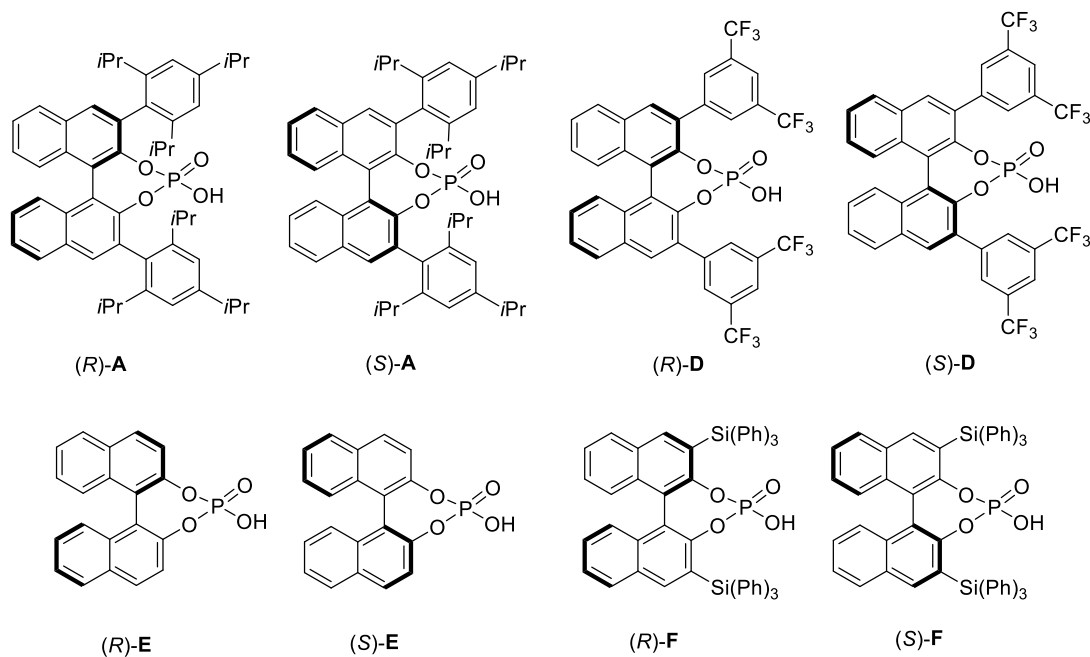

### 3. General procedure and characterization data for bisbenzannulated spiroketals

3

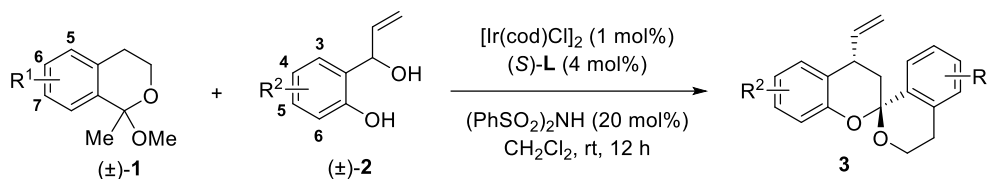

**General procedure A:** Under a nitrogen atmosphere, a flame dried 10 mL Schlenk tube was charged with  $[\text{Ir}(\text{cod})\text{Cl}]_2$  (2.0 mg, 0.003 mmol, 1 mol%), Carreira's ligand  $(S)\text{-L}$  (6.1 mg, 0.012 mmol, 4 mol%). After the tube was evacuated and backfilled with nitrogen, freshly distilled  $\text{CH}_2\text{Cl}_2$  (3.0 mL) was added, then stirred at room temperature for 15 minutes while the solution turned dark red. Then, 2-(1-hydroxyallyl)phenols  $(\pm)\text{-2}$  (0.6 mmol, 2.0 equiv) were added and the reaction mixture immediately turned light yellow. Isochroman ketals  $(\pm)\text{-1}$  (0.3 mmol, 1.0 equiv) and  $(\text{PhSO}_2)_2\text{NH}$  (18.0 mg, 0.06 mmol, 0.2 equiv) were added sequentially. The reaction mixture was stirred at room temperature for 12 h, which was directly purified by silica gel flash column chromatography (petroleum ether/EtOAc = 10/1) to afford bisbenzannulated spiroketals **3**.

Corresponding racemic products  $\text{rac-3}$  were prepared according to the general procedure **A** using racemic ligand which had the same skeleton with  $(S)\text{-L}$ .

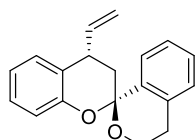

**(2R,4S)-4-Vinylspiro[chromane-2,1'-isochromane] (3a):** Following the general procedure **A**, compound **3a** was obtained as a white solid in 99% yield of the diastereomeric mixtures (82.6 mg), 12:1 dr and 99% ee;  $R_f = 0.8$  (petroleum ether/EtOAc = 10/1), m.p: 84 – 86 °C;  $^1\text{H NMR}$  (400 MHz,  $\text{CDCl}_3$ )  $\delta$  7.43 – 7.35 (m, 1H), 7.29 – 7.22 (m, 3H), 7.20 – 7.12 (m, 2H), 7.01 – 6.90 (m, 1H), 6.86 (dd,  $J = 8.2, 1.2$  Hz, 1H), 5.89 (ddd,  $J = 17.0, 9.5, 8.4$  Hz, 1H), 5.33 (dd,  $J = 17.1, 1.8$  Hz, 1H), 5.25 (dd,  $J = 9.9, 1.8$  Hz, 1H), 4.21 – 4.11 (m, 1H), 3.95 – 3.87 (m, 2H), 3.15 – 3.06 (m, 1H), 2.70 – 2.63 (m, 1H), 2.31 (dd,  $J = 13.3, 12.9$  Hz, 1H), 2.10 (dd,  $J = 13.3, 5.8$  Hz, 1H);  $^{13}\text{C NMR}$  (100 MHz,  $\text{CDCl}_3$ )  $\delta$  152.7, 140.1, 136.5, 134.6, 128.8, 128.7, 128.4, 127.9, 126.9, 126.6, 124.4, 121.0, 117.5(4), 117.4(5), 96.8, 59.5, 39.2, 37.5, 28.9; **HRMS** (EI-TOF)  $m/z$ :  $[\text{M}]^+$  calcd for  $\text{C}_{19}\text{H}_{18}\text{O}_2$ : 278.1301, found: 278.1302;  $[\alpha]_D^{25} = +35.5$  ( $c$  0.20,  $\text{CH}_2\text{Cl}_2$ ); **HPLC** (Chiralcel OJ-H,  $n$ -hexane/ethanol = 99/1, flow rate = 1.0 mL/min,  $\lambda = 220$  nm)  $t_R =$

7.286 min (*trans*-minor), 9.282 min (*cis*-major), 10.938 min (*cis*-minor), 11.996 min (*trans*-major).

**The preparation and X-ray analysis of the single crystal:** Compound **3a** (10.0 mg) was dissolved in 1.0 mL dichloromethane in a screw-top vial and drops of *n*-hexane were added. The lid was then loosely screwed on the vial, and a single crystal was obtained by natural volatilization at room temperature. The data set was collected by a Bruker APEX-II CCD at 293(2) K equipped with Cu radiation source ( $K\alpha = 1.54178 \text{ \AA}$ ). Applied with multi-scan absorption correction, the structure solution was solved and refinement was processed by SHELXTL program package. CCDC 2342942 contains the supplementary crystallographic data, and can be obtained free of charge via [www.ccdc.cam.ac.uk/conts/retrieving.html](http://www.ccdc.cam.ac.uk/conts/retrieving.html).

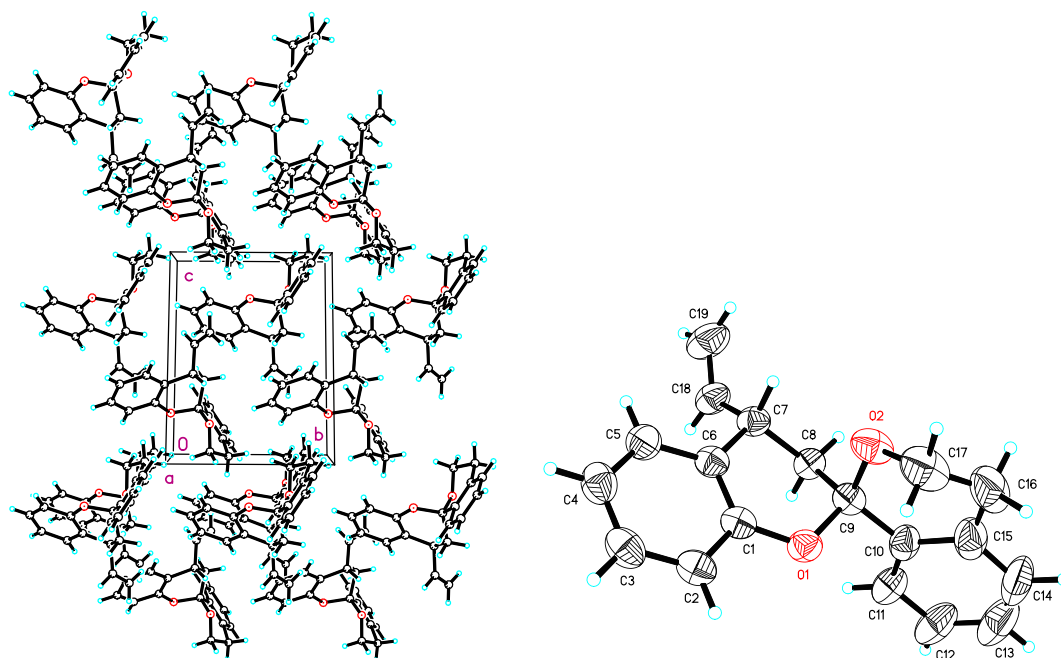

**Fig S1.** The thermal ellipsoid plot for X-ray structure of (2*R*,4*S*)-**3a** with the ellipsoid contour at 30% probability levels

**Crystal data and structure refinement for (2*R*,4*S*)-**3a****

|                      |                                                |                |
|----------------------|------------------------------------------------|----------------|
| Identification code  | cu_dd22077_0m                                  |                |
| Empirical formula    | C <sub>19</sub> H <sub>18</sub> O <sub>2</sub> |                |
| Formula weight       | 278.33                                         |                |
| Temperature          | 293(2) K                                       |                |
| Wavelength           | 1.54178 Å                                      |                |
| Crystal system       | Monoclinic                                     |                |
| Space group          | P 21                                           |                |
| Unit cell dimensions | a = 9.2482(5) Å                                | = 90 °         |
|                      | b = 8.0146(4) Å                                | = 111.655(2) ° |
|                      | c = 11.0460(6) Å                               | = 90 °         |



|                                   |                                             |
|-----------------------------------|---------------------------------------------|
| Volume                            | 760.95(7) Å <sup>3</sup>                    |
| Z                                 | 2                                           |
| Density (calculated)              | 1.215 Mg/m <sup>3</sup>                     |
| Absorption coefficient            | 0.612 mm <sup>-1</sup>                      |
| F (000)                           | 296                                         |
| Crystal size                      | 0.180 x 0.120 x 0.050 mm <sup>3</sup>       |
| Theta range for data collection   | 4.306 to 67.488 °                           |
| Index ranges                      | -11<=h<=11, -9<=k<=9, -12<=l<=13            |
| Reflections collected             | 15380                                       |
| Independent reflections           | 2676 [R(int) = 0.0637]                      |
| Completeness to theta = 67.679 °  | 97.8 %                                      |
| Absorption correction             | Semi-empirical from equivalents             |
| Max. and min. transmission        | 0.7533 and 0.5406                           |
| Refinement method                 | Full-matrix least-squares on F <sup>2</sup> |
| Data / restraints / parameters    | 2676 / 1 / 191                              |
| Goodness-of-fit on F <sup>2</sup> | 1.062                                       |
| Final R indices [I>2sigma(I)]     | R1 = 0.0450, wR2 = 0.1177                   |
| R indices (all data)              | R1 = 0.0498, wR2 = 0.1251                   |
| Absolute structure parameter      | -0.07(16)                                   |
| Extinction coefficient            | 0.14(2)                                     |
| Largest diff. peak and hole       | 0.106 and -0.114 e.Å <sup>-3</sup>          |

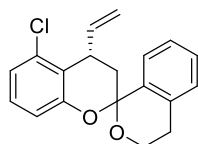

**(2R,4S)-5-Chloro-4-vinylspiro[chromane-2,1'-isochromane] (3b):** Following the general procedure A, compound **3b** was obtained as a colorless oil in 99% yield of the diastereomeric mixtures (92.7 mg), 2:1 dr and 98% / 93% ee [*The product 3b was treated with CF<sub>3</sub>CO<sub>2</sub>H (20 mol%) in CH<sub>2</sub>Cl<sub>2</sub> for 12 h, the dr value had not been changed*],  $R_f = 0.8$  (petroleum ether/EtOAc = 10/1);  $^1\text{H NMR}$  (400 MHz, CDCl<sub>3</sub>)  $\delta$  7.34 – 7.23 (m, 3H), 7.20 – 7.13 (m, 1H), 7.13 – 7.04 (m, 1H), 7.04 – 6.96 (m, 1H), 6.86 – 6.75 (m, 1H), 6.21 (ddd,  $J = 17.7, 10.1, 8.1$  Hz, 1H), 5.23 – 4.99 (m, 2H), 4.18 – 4.08 (m, 1H), 3.96 – 3.89 (m, 1H), 3.88 – 3.81 (m, 1H), 3.09 (ddd,  $J = 17.3, 12.2, 5.8$  Hz, 1H), 2.72 – 2.58 (m, 2H), 2.32 – 2.18 (m, 1H);  $^{13}\text{C NMR}$  (100 MHz, CDCl<sub>3</sub>)  $\delta$  153.7, 141.2, 136.4, 135.4, 134.8, 128.9, 128.5, 128.3, 126.8, 126.7, 123.4, 122.4, 116.4, 114.9, 97.3, 59.4, 38.9, 37.5, 28.7; **HRMS** (EI-TOF)  $m/z$ :  $[\text{M}]^+$  calcd for C<sub>19</sub>H<sub>17</sub><sup>35</sup>ClO<sub>2</sub>: 312.0912, found: 312.0916; C<sub>19</sub>H<sub>17</sub><sup>37</sup>ClO<sub>2</sub>: 314.0883, found: 314.0893;  $[\alpha]_D^{25} = +56.5$  ( $c$  0.20, CH<sub>2</sub>Cl<sub>2</sub>); **HPLC** (Chiralcel OJ-H, *n*-hexane/ethanol = 99/1, flow rate = 1.0 mL/min,  $\lambda = 220$  nm)  $t_R = 6.923$  min (*cis*-minor), 10.875 min (*trans*-major), 11.529 min (*trans*-minor), 12.263 min (*cis*-major).

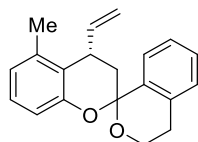

**(2R,4S)-5-Methyl-4-vinylspiro[chromane-2,1'-isochromane] (3c):** Following the general procedure A, compound **3c** was obtained as a white solid in 99% yield of the diastereomeric mixtures (86.7 mg), 1.6:1 dr and 99% / 99% ee [*The product 3c was treated with CF<sub>3</sub>CO<sub>2</sub>H (20 mol%) in CH<sub>2</sub>Cl<sub>2</sub> for 12 h, the dr value had not been changed*],  $R_f = 0.8$  (petroleum ether/EtOAc = 10/1), m.p: 95 – 97 °C;  $^1\text{H NMR}$  (400 MHz, CDCl<sub>3</sub>)  $\delta$  7.36 – 7.22 (m, 3H), 7.18 – 7.12 (m, 1H), 7.10 – 7.00 (m, 1H), 6.82 – 6.68 (m, 2H), 6.24 (ddd,  $J = 17.7, 9.4, 8.1$  Hz, 1H), 5.18 – 4.99 (m, 2H), 4.19 – 4.09 (m, 1H), 3.94 – 3.83 (m, 1H), 3.66 – 3.58 (m, 1H), 3.09 (ddd,  $J = 17.6, 12.2, 6.1$  Hz, 1H), 2.77 – 2.55 (m, 2H), 2.29 (s, 3H), 2.24 – 2.12 (m, 1H);  $^{13}\text{C NMR}$  (100 MHz, CDCl<sub>3</sub>)  $\delta$  152.6, 142.8, 138.7, 137.0, 134.8, 128.8, 128.3, 127.5, 126.9, 126.8, 124.1, 123.2, 115.6, 114.1, 96.7, 59.2, 39.5, 37.5, 28.8, 19.6; **HRMS** (EI-TOF)  $m/z$ :  $[\text{M}]^+$  calcd for C<sub>20</sub>H<sub>20</sub>O<sub>2</sub>: 292.1458, found: 292.1466;  $[\alpha]_D^{25} = +68.5$  ( $c$  0.20, CH<sub>2</sub>Cl<sub>2</sub>); **HPLC** (Chiralcel OJ-H, *n*-hexane/ethanol = 99/1, flow rate = 1.0 mL/min,  $\lambda = 220$  nm)  $t_R = 6.458$  min (*cis*-minor), 8.310 min (*trans*-major), 10.336 min (*cis*-major), 13.882 min (*trans*-minor).

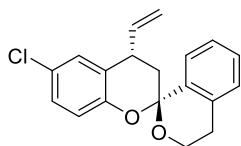

**(2R,4S)-6-Chloro-4-vinylspiro[chromane-2,1'-isochromane] (3d):** Following the general procedure A, compound **3d** was obtained as a white solid in 99% yield of the diastereomeric mixtures (92.9 mg), 14:1 dr and 99% ee;  $R_f = 0.8$  (petroleum ether/EtOAc = 10/1), m.p: 99 – 101 °C;  $^1\text{H NMR}$  (400 MHz,  $\text{CDCl}_3$ )  $\delta$  7.33 – 7.26 (m, 1H), 7.24 – 7.15 (m, 2H), 7.14 – 7.05 (m, 2H), 7.03 – 6.97 (m, 1H), 6.70 (dd,  $J = 8.7, 2.0$  Hz, 1H), 5.69 (ddd,  $J = 16.8, 9.5, 8.4$  Hz, 1H), 5.25 (dd,  $J = 16.9, 1.8$  Hz, 1H), 5.19 (dd,  $J = 9.5, 1.8$  Hz, 1H), 4.13 – 3.99 (m, 1H), 3.88 – 3.73 (m, 2H), 3.07 – 2.96 (m, 1H), 2.62 – 2.52 (m, 1H), 2.19 (dd,  $J = 13.0, 12.6$  Hz, 1H), 2.01 (dd,  $J = 13.4, 6.0$  Hz, 1H);  $^{13}\text{C NMR}$  (100 MHz,  $\text{CDCl}_3$ )  $\delta$  151.4, 139.2, 136.0, 134.6, 128.9, 128.6, 128.4, 127.8, 126.9, 126.6, 126.2, 125.9, 118.8, 118.3, 96.9, 59.6, 38.8, 37.6, 28.8; **HRMS** (EI-TOF)  $m/z$ :  $[\text{M}]^+$  calcd for  $\text{C}_{19}\text{H}_{17}^{35}\text{ClO}_2$ : 312.0912, found: 312.0918;  $\text{C}_{19}\text{H}_{17}^{37}\text{ClO}_2$ : 314.0883, found: 314.0892;  $[\alpha]_{\text{D}}^{25} = +57.5$  ( $c$  0.20,  $\text{CH}_2\text{Cl}_2$ ); **HPLC** (Chiralcel OD-H,  $n$ -hexane/ethanol = 99/1, flow rate = 1.0 mL/min,  $\lambda = 220$  nm)  $t_{\text{R}} = 3.854$  min (minor), 4.070 min (major).

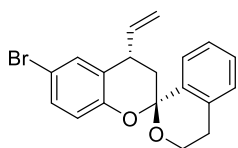

**(2R,4S)-6-Bromo-4-vinylspiro[chromane-2,1'-isochromane] (3e):** Following the general procedure A, compound **3e** was obtained as a colorless oil in 99% yield of the diastereomeric mixtures (106.0 mg), 14:1 dr and 99% ee;  $R_f = 0.8$  (petroleum ether/EtOAc = 10/1);  $^1\text{H NMR}$  (400 MHz,  $\text{CDCl}_3$ )  $\delta$  7.30 – 7.23 (m, 2H), 7.22 – 7.16 (m, 2H), 7.14 – 7.07 (m, 2H), 6.64 (d,  $J = 8.6$  Hz, 1H), 5.68 (ddd,  $J = 17.2, 9.5, 8.4$  Hz, 1H), 5.24 (dd,  $J = 16.8, 1.8$  Hz, 1H), 5.18 (dd,  $J = 10.0, 1.8$  Hz, 1H), 4.14 – 3.98 (m, 1H), 3.87 – 3.72 (m, 2H), 3.06 – 2.94 (m, 1H), 2.59 – 2.50 (m, 1H), 2.18 (dd,  $J = 13.0, 12.6$  Hz, 1H), 2.00 (dd,  $J = 13.5, 5.9$  Hz, 1H);  $^{13}\text{C NMR}$  (100 MHz,  $\text{CDCl}_3$ )  $\delta$  151.9, 139.2, 136.0, 134.6, 131.4, 130.7, 128.9, 128.6, 126.9, 126.8, 126.5, 119.3, 118.3, 113.3, 96.9, 59.6, 38.8, 37.5, 28.7; **HRMS** (EI-TOF)  $m/z$ :  $[\text{M}]^+$  calcd for  $\text{C}_{19}\text{H}_{17}^{79}\text{BrO}_2$ : 356.0406, found: 356.0415;  $\text{C}_{19}\text{H}_{17}^{81}\text{BrO}_2$ : 358.0386, found: 358.0395;  $[\alpha]_{\text{D}}^{25} = +47.0$  ( $c$  0.20,  $\text{CH}_2\text{Cl}_2$ ); **HPLC** (Chiralpak IB,  $n$ -hexane/ethanol = 99/1, flow rate = 1.0 mL/min,  $\lambda = 220$  nm)  $t_{\text{R}} = 4.013$  min (minor), 4.341 min (major).

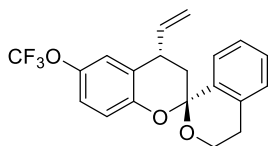

**(2R,4S)-6-(Trifluoromethoxy)-4-vinylspiro[chromane-2,1'-isochromane] (3f):** Following the general procedure **A**, compound **3f** was obtained as a colorless oil in 88% yield of the diastereomeric mixtures (95.6 mg), 14:1 dr and 97% ee;  $R_f = 0.8$  (petroleum ether/EtOAc = 10/1);  $^1\text{H NMR}$  (400 MHz,  $\text{CDCl}_3$ )  $\delta$  7.37 (dd,  $J = 6.8, 2.2$  Hz, 1H), 7.32 – 7.26 (m, 2H), 7.19 (dd,  $J = 6.8, 2.1$  Hz, 1H), 7.10 (d,  $J = 2.8$  Hz, 1H), 7.00 (dd,  $J = 8.9, 2.8$  Hz, 1H), 6.84 (d,  $J = 8.8$  Hz, 1H), 5.78 (ddd,  $J = 17.0, 9.5, 8.4$  Hz, 1H), 5.35 (dd,  $J = 17.0, 1.7$  Hz, 1H), 5.29 (dd,  $J = 9.9, 1.7$  Hz, 1H), 4.15 (ddd,  $J = 12.6, 11.2, 2.9$  Hz, 1H), 4.01 – 3.82 (m, 2H), 3.20 – 3.04 (m, 1H), 2.72 – 2.60 (m, 1H), 2.28 (dd,  $J = 13.2, 13.0$  Hz, 1H), 2.11 (dd,  $J = 13.4, 5.9$  Hz, 1H);  $^{13}\text{C NMR}$  (100 MHz,  $\text{CDCl}_3$ )  $\delta$  151.3, 143.0, 139.1, 136.0, 134.7, 128.9, 128.6, 127.0, 126.6, 125.8, 121.6, 120.9, 120.8 (q, C-F,  $^1J_{\text{C-F}} = 329.0$  Hz), 118.4, 118.3, 97.0, 59.7, 38.8, 37.6, 28.8;  $^{19}\text{F NMR}$  (376 MHz,  $\text{CDCl}_3$ )  $\delta$  -58.19 (s); **HRMS** (EI-TOF)  $m/z$ :  $[\text{M}]^+$  calcd for  $\text{C}_{20}\text{H}_{17}\text{F}_3\text{O}_3$ : 362.1124, found: 362.1133;  $[\alpha]_{\text{D}}^{25} = +35.0$  ( $c$  0.20,  $\text{CH}_2\text{Cl}_2$ ); **HPLC** (Chiralcel OJ-H,  $n$ -hexane/isopropanol = 99/1, flow rate = 1.0 mL/min,  $\lambda = 220$  nm)  $t_{\text{R}} = 4.927$  min (*trans*-minor), 5.821 min (*cis*-major), 7.204 min (*cis*-minor), 7.892 min (*trans*-major).

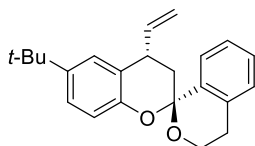

**(2R,4S)-6-(tert-Butyl)-4-vinylspiro[chromane-2,1'-isochromane] (3g):** Following the general procedure **A**, compound **3g** was obtained as a white solid in 80% yield of the diastereomeric mixtures (80.2 mg), 13:1 dr and 96% ee [*The product 3g was treated with  $\text{CF}_3\text{CO}_2\text{H}$  (20 mol%) in  $\text{CH}_2\text{Cl}_2$  for 12 h, the dr value changed from 2:1 to 13:1*],  $R_f = 0.8$  (petroleum ether/EtOAc = 10/1), m.p: 127 – 129 °C;  $^1\text{H NMR}$  (400 MHz,  $\text{CDCl}_3$ )  $\delta$  7.38 – 7.31 (m, 1H), 7.28 – 7.21 (m, 3H), 7.19 – 7.11 (m, 2H), 6.81 (d,  $J = 8.5$  Hz, 1H), 5.82 (ddd,  $J = 17.2, 9.5, 8.4$  Hz, 1H), 5.32 (dd,  $J = 16.9, 1.8$  Hz, 1H), 5.24 (dd,  $J = 10.0, 1.8$  Hz, 1H), 4.22 – 4.11 (m, 1H), 3.96 – 3.83 (m, 2H), 3.14 – 3.02 (m, 1H), 2.67 – 2.58 (m, 1H), 2.29 (dd,  $J = 12.9, 12.8$  Hz, 1H), 2.08 (dd,  $J = 13.4, 5.7$  Hz, 1H), 1.29 (s, 9H);  $^{13}\text{C NMR}$  (100 MHz,  $\text{CDCl}_3$ )  $\delta$  150.4, 143.6, 140.2, 136.6, 134.6, 128.8, 128.4, 126.9, 126.6, 125.3, 124.9, 123.4, 117.5, 116.8, 96.7, 59.5, 39.4, 37.6, 34.3, 31.7 (3C), 28.9; **HRMS** (EI-TOF)  $m/z$ :  $[\text{M}]^+$  calcd for  $\text{C}_{23}\text{H}_{26}\text{O}_2$ : 334.1927, found: 334.1936;  $[\alpha]_{\text{D}}^{25} = +34.0$  ( $c$  0.20,  $\text{CH}_2\text{Cl}_2$ ); **HPLC** (Chiralcel OJ-H,  $n$ -hexane/isopropanol = 99/1, flow rate = 1.0 mL/min,  $\lambda = 220$  nm)  $t_{\text{R}} = 5.315$  min (*trans*-minor), 7.257 min (*cis*-major), 7.863 min (*cis*-minor), 11.389 min (*trans*-major).

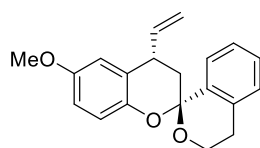

**(2R,4S)-6-Methoxy-4-vinylspiro[chromane-2,1'-isochromane] (3h):** Following the general procedure A, compound **3h** was obtained as a colorless oil in 98% yield of the diastereomeric mixtures (90.6 mg), 14:1 dr and 98% ee [*The product 3h* was treated with  $CF_3CO_2H$  (20 mol%) in  $CH_2Cl_2$  for 12 h, the dr value changed from 8:1 to 14:1],  $R_f = 0.8$  (petroleum ether/EtOAc = 10/1);  $^1H$  NMR (400 MHz,  $CDCl_3$ )  $\delta$  7.38 (dd,  $J = 6.4, 2.6$  Hz, 1H), 7.31 – 7.23 (m, 2H), 7.17 (dd,  $J = 6.4, 2.5$  Hz, 1H), 6.80 (d,  $J = 8.7$  Hz, 2H), 6.75 – 6.67 (m, 1H), 5.81 (ddd,  $J = 17.1, 9.5, 8.4$  Hz, 1H), 5.32 (dd,  $J = 17.0, 1.8$  Hz, 1H), 5.24 (dd,  $J = 9.9, 1.7$  Hz, 1H), 4.16 (ddd,  $J = 12.7, 11.2, 2.9$  Hz, 1H), 3.96 – 3.81 (m, 2H), 3.75 (s, 3H), 3.09 (ddd,  $J = 17.6, 12.5, 6.0$  Hz, 1H), 2.68 – 2.59 (m, 1H), 2.29 (dd,  $J = 13.0, 12.9$  Hz, 1H), 2.08 (dd,  $J = 13.3, 6.0$  Hz, 1H);  $^{13}C$  NMR (100 MHz,  $CDCl_3$ )  $\delta$  153.9, 146.7, 140.0, 136.5, 134.6, 128.8, 128.4, 126.9, 126.6, 125.0, 118.0, 117.6, 113.7, 113.6, 96.6, 59.4, 55.8, 39.1, 37.8, 28.8; **HRMS** (EI-TOF)  $m/z$ :  $[M]^+$  calcd for  $C_{20}H_{20}O_3$ : 308.1407, found: 308.1416;  $[\alpha]_D^{25} = +53.5$  ( $c$  0.20,  $CH_2Cl_2$ ); **HPLC** (Chiralcel OJ-H,  $n$ -hexane/ isopropanol = 99/1, flow rate = 1.0 mL/min,  $\lambda = 220$  nm)  $t_R = 14.027$  min (*trans*-minor), 17.086 min (*cis*-major), 24.586 min (*cis*-minor), 26.904 min (*trans*-major).

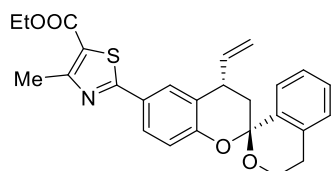

**Ethyl 4-methyl-2-((2R,4S)-4-vinylspiro[chromane-2,1'-isochroman]-6-yl) thiazole-5-carboxylate (3i):** Following the general procedure A, compound **3i** was obtained as a white solid in 99% yield of the diastereomeric mixtures (132.8 mg), 14:1 dr and 93% ee;  $R_f = 0.4$  (petroleum ether/EtOAc = 10/1), m.p: 75 – 77 °C;  $^1H$  NMR (400 MHz,  $CDCl_3$ )  $\delta$  7.83 (s, 1H), 7.77 (d,  $J = 8.6$  Hz, 1H), 7.39 (d,  $J = 7.1$  Hz, 1H), 7.33 – 7.23 (m, 2H), 7.19 (d,  $J = 7.0$  Hz, 1H), 6.90 (d,  $J = 8.8$  Hz, 1H), 5.85 (ddd,  $J = 17.0, 9.7, 8.4$  Hz, 1H), 5.41 (dd,  $J = 17.0, 1.8$  Hz, 1H), 5.33 (dd,  $J = 9.9, 1.8$  Hz, 1H), 4.33 (q,  $J = 7.2$  Hz, 2H), 4.21 – 4.10 (m, 1H), 4.02 – 3.87 (m, 2H), 3.11 (ddd,  $J = 17.6, 12.5, 5.8$  Hz, 1H), 2.76 (s, 3H), 2.70 – 2.61 (m, 1H), 2.32 (dd,  $J = 13.2, 13.0$  Hz, 1H), 2.14 (dd,  $J = 13.8, 5.7$  Hz, 1H), 1.38 (t,  $J = 7.2$  Hz, 3H);  $^{13}C$  NMR (100 MHz,  $CDCl_3$ )  $\delta$  170.2, 162.6, 161.2, 155.5, 139.2, 135.8, 134.6, 128.9, 128.6, 127.6, 127.0, 126.8, 126.6, 126.3, 125.3, 120.9, 118.5, 118.2, 97.3, 61.2, 59.7, 39.1, 37.4, 28.7, 17.7, 14.5; **HRMS** (EI-TOF)  $m/z$ :  $[M]^+$  calcd for  $C_{26}H_{25}NO_4S$ : 447.1499, found: 447.1508;  $[\alpha]_D^{25} = +53.0$  ( $c$  0.20,

CH<sub>2</sub>Cl<sub>2</sub>); **HPLC** (Chiralpak AD-H, *n*-hexane/ethanol = 99/1, flow rate = 1.0 mL/min, λ = 220 nm) t<sub>R</sub> = 9.729 min (minor), 10.635 min (major).

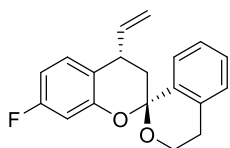

**(2R,4S)-7-Fluoro-4-vinylspiro[chromane-2,1'-isochromane] (3j):** Following the general procedure A, compound **3j** was obtained as a colorless oil in 96% yield of the diastereomeric mixtures (85.2 mg), 12:1 dr and 99% ee; R<sub>f</sub> = 0.8 (petroleum ether/EtOAc = 10/1); **<sup>1</sup>H NMR** (400 MHz, CDCl<sub>3</sub>) δ 7.45 (d, *J* = 7.0 Hz, 1H), 7.40 – 7.34 (m, 2H), 7.31 – 7.20 (m, 2H), 6.78 – 6.69 (m, 1H), 6.67 (dd, *J* = 10.1, 2.5 Hz, 1H), 5.85 (ddd, *J* = 16.9, 10.0, 8.4 Hz, 1H), 5.40 (dd, *J* = 16.9, 1.8 Hz, 1H), 5.33 (dd, *J* = 10.0, 1.8 Hz, 1H), 4.33 – 4.20 (m, 1H), 4.06 – 3.98 (m, 1H), 3.96 – 3.86 (m, 1H), 3.25 – 3.12 (m, 1H), 2.78 – 2.69 (m, 1H), 2.36 (dd, *J* = 13.7, 13.0 Hz, 1H), 2.18 (dd, *J* = 13.7, 5.9 Hz, 1H); **<sup>13</sup>C NMR** (100 MHz, CDCl<sub>3</sub>) δ 162.4 (d, C-F, <sup>1</sup>*J*<sub>C-F</sub> = 243.9 Hz), 153.7 (d, C-F, <sup>3</sup>*J*<sub>C-F</sub> = 11.8 Hz), 139.9, 136.0, 134.6, 129.7 (d, C-F, <sup>3</sup>*J*<sub>C-F</sub> = 9.5 Hz), 128.9, 128.6, 126.9, 126.6, 120.2 (d, C-F, <sup>4</sup>*J*<sub>C-F</sub> = 3.2 Hz), 117.7, 108.0 (d, C-F, <sup>2</sup>*J*<sub>C-F</sub> = 21.3 Hz), 104.5 (d, C-F, <sup>2</sup>*J*<sub>C-F</sub> = 24.4 Hz), 97.1, 59.6, 39.1, 37.1, 28.8; **<sup>19</sup>F NMR** (376 MHz, CDCl<sub>3</sub>) δ -114.59 – -114.97 (m); **HRMS** (EI-TOF) *m/z*: [M]<sup>+</sup> calcd for C<sub>19</sub>H<sub>17</sub>FO<sub>2</sub>: 296.1207, found: 296.1210; [α]<sub>D</sub><sup>25</sup> = +24.5 (*c* 0.20, CH<sub>2</sub>Cl<sub>2</sub>); **HPLC** (Chiralpak AD-H, *n*-hexane/isopropanol = 99/1, flow rate = 1.0 mL/min, λ = 220 nm) t<sub>R</sub> = 3.546 min (minor), 3.807 min (major).

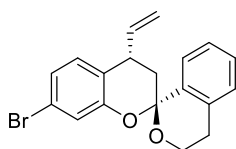

**(2R,4S)-7-Bromo-4-vinylspiro[chromane-2,1'-isochromane] (3k):** Following the general procedure A, compound **3k** was obtained as a white solid in 99% yield of the diastereomeric mixtures (106.0 mg), 14:1 dr and 99% ee [*The product 3k was treated with CF<sub>3</sub>CO<sub>2</sub>H (20 mol%) in CH<sub>2</sub>Cl<sub>2</sub> for 12 h, the dr value changed from 12:1 to 14:1*], R<sub>f</sub> = 0.8 (petroleum ether/EtOAc = 10/1), m.p: 114 – 116 °C; **<sup>1</sup>H NMR** (400 MHz, CDCl<sub>3</sub>) δ 7.37 – 7.32 (m, 1H), 7.31 – 7.25 (m, 2H), 7.28 (d, *J* = 7.1 Hz, 1H), 7.21 – 7.09 (m, 3H), 5.86 (ddd, *J* = 16.9, 10.7, 8.4 Hz, 1H), 5.42 (dd, *J* = 16.9, 1.8 Hz, 1H), 5.35 (dd, *J* = 10.0, 1.8 Hz, 1H), 4.31 – 4.17 (m, 1H), 4.07 – 3.99 (m, 1H), 3.93 (ddd, *J* = 12.8, 7.6, 6.0 Hz, 1H), 3.26 – 3.12 (m, 1H), 2.80 – 2.69 (m, 1H), 2.37 (dd, *J* = 13.4, 12.4 Hz, 1H), 2.20 (dd, *J* = 13.4, 6.0 Hz, 1H); **<sup>13</sup>C NMR** (100 MHz, CDCl<sub>3</sub>) δ 153.6, 139.4, 135.9, 134.6, 130.1, 128.9, 128.6, 126.9, 126.6, 124.0, 123.6, 120.7, 120.5, 118.0, 97.1, 59.7, 39.0, 37.2, 28.7; **HRMS** (EI-TOF) *m/z*: [M]<sup>+</sup> calcd for C<sub>19</sub>H<sub>17</sub><sup>79</sup>BrO<sub>2</sub>:

356.0406, found: 356.0414; C<sub>19</sub>H<sub>17</sub><sup>81</sup>BrO<sub>2</sub>: 358.0386, found: 358.0397; [ $\alpha$ ]<sub>D</sub><sup>25</sup> = +47.0 (*c* 0.20, CH<sub>2</sub>Cl<sub>2</sub>); **HPLC** (Chiralpak IG, *n*-hexane/isopropanol = 99/1, flow rate = 1.0 mL/min,  $\lambda$  = 220 nm) *t*<sub>R</sub> = 3.759 min (minor), 4.006 min (major).

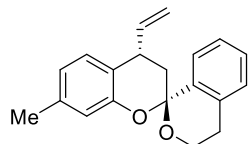

**(2R,4S)-7-Methyl-4-vinylspiro[chromane-2,1'-isochromane] (3l)**: Following the general procedure **A**, compound **3l** was obtained as a white solid in 61% yield of the diastereomeric mixtures (53.4 mg), 14:1 dr and 99% ee; *R*<sub>f</sub> = 0.8 (petroleum ether/EtOAc = 10/1), m.p: 84 – 86 °C; **<sup>1</sup>H NMR** (400 MHz, CDCl<sub>3</sub>)  $\delta$  7.37 (dd, *J* = 7.0, 2.7 Hz, 1H), 7.31 – 7.23 (m, 2H), 7.17 (d, *J* = 6.3 Hz, 1H), 7.11 (d, *J* = 7.8 Hz, 1H), 6.76 (d, *J* = 7.8 Hz, 1H), 6.69 (s, 1H), 5.79 (ddd, *J* = 17.0, 9.2, 8.4 Hz, 1H), 5.31 (dd, *J* = 16.8, 1.8 Hz, 1H), 5.23 (dd, *J* = 9.6, 1.8 Hz, 1H), 4.28 – 4.13 (m, 1H), 3.97 – 3.79 (m, 2H), 3.17 – 3.03 (m, 1H), 2.69 – 2.59 (m, 1H), 2.32 – 2.21 (m, 4H), 2.06 (dd, *J* = 13.2, 5.2 Hz, 1H); **<sup>13</sup>C NMR** (100 MHz, CDCl<sub>3</sub>)  $\delta$  152.5, 140.2, 137.9, 136.5, 134.6, 128.8, 128.5, 128.3, 126.9, 126.6, 121.9, 121.4, 117.8, 117.3, 96.7, 59.5, 39.3, 37.2, 28.8, 21.1; **HRMS** (EI-TOF) *m/z*: [*M*]<sup>+</sup> calcd for C<sub>20</sub>H<sub>20</sub>O<sub>2</sub>: 292.1458, found: 292.1466; [ $\alpha$ ]<sub>D</sub><sup>25</sup> = +38.5 (*c* 0.20, CH<sub>2</sub>Cl<sub>2</sub>); **HPLC** (Chiralcel OJ-H, *n*-hexane/ethanol = 99/1, flow rate = 1.0 mL/min,  $\lambda$  = 220 nm) *t*<sub>R</sub> = 6.684 min (*trans*-minor), 7.347 min (*cis*-major), 11.129 min (*cis*-minor), 12.234 min (*trans*-major).

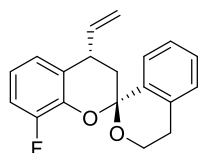

**(2R,4S)-8-Fluoro-4-vinylspiro[chromane-2,1'-isochromane] (3m)**: Following the general procedure **A**, compound **3m** was obtained as a colorless oil in 99% yield of the diastereomeric mixtures (87.9 mg), 11:1 dr and 98% ee; *R*<sub>f</sub> = 0.8 (petroleum ether/EtOAc = 10/1); **<sup>1</sup>H NMR** (400 MHz, CDCl<sub>3</sub>)  $\delta$  7.41 – 7.34 (m, 1H), 7.31 – 7.23 (m, 2H), 7.19 – 7.13 (m, 1H), 7.01 – 6.96 (m, 1H), 6.96 – 6.90 (m, 1H), 6.88 – 6.79 (m, 1H), 5.79 (ddd, *J* = 17.3, 9.6, 8.4 Hz, 1H), 5.32 (dd, *J* = 17.2, 1.9 Hz, 1H), 5.25 (dd, *J* = 9.9, 1.9 Hz, 1H), 4.24 – 4.14 (m, 1H), 3.9 – 3.84 (m, 2H), 3.10 (ddd, *J* = 17.5, 12.5, 5.8 Hz, 1H), 2.70 – 2.60 (m, 1H), 2.32 (dd, *J* = 13.5, 12.9 Hz, 1H), 2.11 (dd, *J* = 13.5, 5.8 Hz, 1H); **<sup>13</sup>C NMR** (100 MHz, CDCl<sub>3</sub>)  $\delta$  152.1 (d, C-F, <sup>1</sup>*J*<sub>C-F</sub> = 245.0 Hz), 141.2 (d, C-F, <sup>2</sup>*J*<sub>C-F</sub> = 10.9 Hz), 139.6, 135.8, 134.7, 128.8, 128.6, 127.1, 126.9, 126.8, 123.6 (d, <sup>3</sup>*J*<sub>C-F</sub> = 3.3 Hz), 120.1 (d, C-F, <sup>3</sup>*J*<sub>C-F</sub> = 7.4 Hz), 117.8, 114.4 (d, C-F, <sup>2</sup>*J*<sub>C-F</sub> = 18.4 Hz), 97.0, 59.8, 39.2, 37.5 (d, C-F, <sup>4</sup>*J*<sub>C-F</sub> = 2.6 Hz), 28.8; **<sup>19</sup>F NMR** (376 MHz, CDCl<sub>3</sub>)  $\delta$  -

136.19 – -136.32 (m); **HRMS** (EI-TOF)  $m/z$ :  $[M]^+$  calcd for  $C_{19}H_{17}FO_2$ : 296.1207, found: 296.1216;  $[\alpha]_D^{25} = +36.5$  ( $c$  0.20,  $CH_2Cl_2$ ); **HPLC** (Chiralcel OJ-H,  $n$ -hexane/isopropanol = 99/1, flow rate = 1.0 mL/min,  $\lambda = 220$  nm)  $t_R = 8.603$  min (minor), 10.228 min (major).

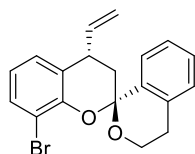

**(2R,4S)-8-Bromo-4-vinylspiro[chromane-2,1'-isochromane] (3n)**: Following the general procedure **A**, compound **3n** was obtained as a colorless oil in 91% yield of the diastereomeric mixtures (97.5 mg), 14:1 dr, and 98% ee [*The product 3n* was treated with  $CF_3CO_2H$  (20 mol%) in  $CH_2Cl_2$  for 12 h, the dr changed from 7:1 to 14:1];  $R_f = 0.8$  (petroleum ether/EtOAc = 10/1);  **$^1H$  NMR** (400 MHz,  $CDCl_3$ )  $\delta$  7.44 – 7.35 (m, 2H), 7.30 – 7.25 (m, 2H), 7.21 – 7.13 (m, 2H), 6.86 – 6.75 (m, 1H), 5.78 (ddd,  $J = 18.0, 9.6, 8.4$  Hz, 1H), 5.32 (dd,  $J = 17.8, 1.9$  Hz, 1H), 5.25 (dd,  $J = 9.9, 1.9$  Hz, 1H), 4.28 – 4.11 (m, 1H), 3.98 – 3.82 (m, 2H), 3.11 (ddd,  $J = 17.7, 12.5, 5.8$  Hz, 1H), 2.72 – 2.61 (m, 1H), 2.32 (dd,  $J = 13.2, 13.0$  Hz, 1H), 2.10 (dd,  $J = 13.5, 6.1$  Hz, 1H);  **$^{13}C$  NMR** (100 MHz,  $CDCl_3$ )  $\delta$  149.6, 139.6, 135.9, 134.6, 131.6, 128.8, 128.5, 127.9, 126.8(3), 126.8(0), 126.3, 121.6, 117.9, 111.8, 97.5, 59.8, 39.1, 37.9, 28.8; **HRMS** (EI-TOF)  $m/z$ :  $[M]^+$  calcd for  $C_{19}H_{17}^{79}BrO_2$ : 356.0406, found: 356.0414;  $C_{19}H_{17}^{81}BrO_2$ : 358.0386, found: 358.0394;  $[\alpha]_D^{25} = +54.5$  ( $c$  0.20,  $CH_2Cl_2$ ); **HPLC** (Chiralpak IG,  $n$ -hexane/isopropanol = 99/1, flow rate = 1.0 mL/min,  $\lambda = 220$  nm)  $t_R = 4.031$  min (major), 4.873 min (minor).

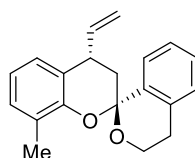

**(2R,4S)-8-Methyl-4-vinylspiro[chromane-2,1'-isochromane] (3o)**: Following the general procedure **A**, compound **3o** was obtained as a white solid in 99% yield of the diastereomeric mixtures (86.7 mg), 12:1 dr and 99% ee [*The product 3o* was treated with  $CF_3CO_2H$  (20 mol%) in  $CH_2Cl_2$  for 12 h, the dr value changed from 3:1 to 12:1];  $R_f = 0.8$  (petroleum ether/EtOAc = 10/1), m.p.: 65 – 67 °C;  **$^1H$  NMR** (400 MHz,  $CDCl_3$ )  $\delta$  7.36 (d,  $J = 7.3$  Hz, 1H), 7.31 – 7.21 (m, 2H), 7.17 (d,  $J = 7.2$  Hz, 1H), 7.07 (d,  $J = 7.7$  Hz, 1H), 7.00 (d,  $J = 7.5$  Hz, 1H), 6.88 – 6.78 (m, 1H), 5.80 (ddd,  $J = 17.2, 9.5, 8.4$  Hz, 1H), 5.29 (dd,  $J = 17.0, 1.9$  Hz, 1H), 5.21 (dd,  $J = 10.0, 1.9$  Hz, 1H), 4.20 – 4.04 (m, 1H), 3.96 – 3.82 (m, 2H), 3.09 (ddd,  $J = 17.9, 12.8, 5.9$  Hz, 1H), 2.69 – 2.55 (m, 1H), 2.28 (dd,  $J = 13.2, 13.0$  Hz, 1H), 2.21 – 1.98 (m, 4H);  **$^{13}C$  NMR** (100 MHz,  $CDCl_3$ )  $\delta$  150.8, 140.4, 136.9, 134.7, 129.1, 128.7, 128.2, 126.9, 126.7, 126.4, 126.2, 123.8, 120.3, 117.2, 96.6, 59.5, 39.3, 37.6, 29.0, 16.4; **HRMS** (EI-TOF)  $m/z$ :  $[M]^+$  calcd for



C<sub>20</sub>H<sub>20</sub>O<sub>2</sub>: 292.1458, found: 292.1465; [ $\alpha$ ]<sub>D</sub><sup>25</sup> = +34.5 (*c* 0.20, CH<sub>2</sub>Cl<sub>2</sub>); **HPLC** (Chiralpak AD-H, *n*-hexane/isopropanol = 99/1, flow rate = 1.0 mL/min,  $\lambda$  = 220 nm) *t*<sub>R</sub> = 3.363 min (minor), 3.596 min (major).

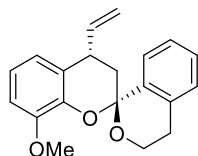

**(2R,4S)-8-Methoxy-4-vinylspiro[chromane-2,1'-isochromane] (3p)**: Following the general procedure **A**, compound **3p** was obtained as a colorless oil in 98% yield of the diastereomeric mixtures (90.6 mg), 11:1 dr and >99% ee; *R*<sub>f</sub> = 0.8 (petroleum ether/EtOAc = 10/1); **<sup>1</sup>H NMR** (400 MHz, CDCl<sub>3</sub>)  $\delta$  7.40 (dd, *J* = 6.7, 2.5 Hz, 1H), 7.30 – 7.21 (m, 2H), 7.19 – 7.12 (m, 1H), 6.87 (d, *J* = 7.3 Hz, 2H), 6.78 (dd, *J* = 7.0, 2.5 Hz, 1H), 5.81 (ddd, *J* = 16.8, 9.5, 8.4 Hz, 1H), 5.30 (dd, *J* = 17.0, 1.8 Hz, 1H), 5.21 (dd, *J* = 10.0, 1.8 Hz, 1H), 4.25 – 4.13 (m, 1H), 3.97 – 3.83 (m, 2H), 3.77 (s, 3H), 3.10 (ddd, *J* = 17.8, 12.5, 5.9 Hz, 1H), 2.70 – 2.61 (m, 1H), 2.31 (dd, *J* = 13.4, 12.9 Hz, 1H), 2.08 (dd, *J* = 13.4, 5.9 Hz, 1H); **<sup>13</sup>C NMR** (100 MHz, CDCl<sub>3</sub>)  $\delta$  149.1, 142.5, 140.3, 136.5, 134.7, 128.7, 128.3, 127.0, 126.9, 125.4, 120.6, 120.3, 117.2, 110.6, 96.7, 59.6, 56.3, 39.4, 37.7, 28.9; **HRMS** (EI-TOF) *m/z*: [*M*]<sup>+</sup> calcd for C<sub>20</sub>H<sub>20</sub>O<sub>3</sub>: 308.1407, found: 308.1415; [ $\alpha$ ]<sub>D</sub><sup>25</sup> = +41.0 (*c* 0.20, CH<sub>2</sub>Cl<sub>2</sub>); **HPLC** (Chiralcel OJ-H, *n*-hexane/ethanol = 99/1, flow rate = 1.0 mL/min,  $\lambda$  = 220 nm) *t*<sub>R</sub> = 9.795 min (*cis*-major), 10.604 min (*trans*-minor), 25.423 min (*cis*-minor), 29.495 min (*trans*-major).

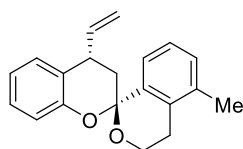

**(2R,4S)-5'-Methyl-4-vinylspiro[chromane-2,1'-isochromane] (3q)**: Following the general procedure **A**, CF<sub>3</sub>CO<sub>2</sub>H (4.6  $\mu$ L/6.8 mg, 18 mg, 0.06 mmol, 0.2 equiv) was used instead of (PhSO<sub>2</sub>)<sub>2</sub>NH, compound **3q** was obtained as a white solid in 52% yield of the diastereomeric mixtures (45.6 mg), 17:1 dr and 91% ee; *R*<sub>f</sub> = 0.6 (petroleum ether/EtOAc = 10/1), m.p: 100 – 102 °C; **<sup>1</sup>H NMR** (400 MHz, CDCl<sub>3</sub>)  $\delta$  7.37 – 7.29 (m, 2H), 7.28 – 7.18 (m, 3H), 7.07 – 6.99 (m, 1H), 6.95 (dd, *J* = 8.0, 1.3 Hz, 1H), 5.89 (ddd, *J* = 16.9, 9.5, 8.5 Hz, 1H), 5.40 (dd, *J* = 17.1, 1.8 Hz, 1H), 5.32 (dd, *J* = 9.9, 1.8 Hz, 1H), 4.31 – 4.23 (m, 1H), 4.09 – 4.03 (m, 1H), 3.97 (ddd, *J* = 12.7, 9.0, 5.9 Hz, 1H), 2.95 (ddd, *J* = 18.0, 12.4, 6.1 Hz, 1H), 2.72 – 2.65 (m, 1H), 2.44 – 2.34 (m, 4H), 2.15 (dd, *J* = 13.3, 5.8 Hz, 1H); **<sup>13</sup>C NMR** (100 MHz, CDCl<sub>3</sub>)  $\delta$  152.7, 140.1, 136.3, 136.2, 133.2, 129.7, 128.7, 127.9, 126.4, 124.5, 124.2, 121.0, 117.5(2), 117.4(6), 96.9, 59.1, 39.2, 37.6, 26.3, 19.3; **HRMS** (EI-TOF) *m/z*: [*M*]<sup>+</sup> calcd for C<sub>20</sub>H<sub>20</sub>O<sub>2</sub>: 292.1458, found:

292.1465;  $[\alpha]_{\text{D}}^{25} = +18.0$  ( $c$  0.20,  $\text{CH}_2\text{Cl}_2$ ); **HPLC** (Chiralcel OJ-H,  $n$ -hexane/ethanol = 99/1, flow rate = 1.0 mL/min,  $\lambda = 220$  nm)  $t_{\text{R}} = 7.817$  min (*trans*-minor), 10.175 min (*cis*-major), 13.777 min (*cis*-minor), 16.227 min (*trans*-major).

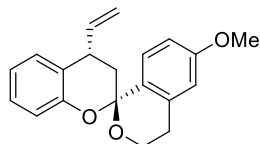

**(2R,4S)-6'-Methoxy-4-vinylspiro[chromane-2,1'-isochromane] (3r)**: Following the general procedure **A**,  $\text{CF}_3\text{CO}_2\text{H}$  (4.6  $\mu\text{L}$ /6.8 mg, 18 mg, 0.06 mmol, 0.2 equiv) was used instead of  $(\text{PhSO}_2)_2\text{NH}$ , compound **3r** was obtained as a white solid in 63% yield of the diastereomeric mixtures (58.2 mg), 15:1 dr and 93% ee;  $R_{\text{f}} = 0.6$  (petroleum ether/EtOAc = 10/1), m.p: 106 – 108  $^{\circ}\text{C}$ ;  $^1\text{H NMR}$  (400 MHz,  $\text{CDCl}_3$ )  $\delta$  7.30 (d,  $J = 8.6$  Hz, 1H), 7.25 – 7.22 (m, 1H), 7.17 – 7.10 (m, 1H), 6.97 – 6.90 (m, 1H), 6.88 – 6.79 (m, 2H), 6.70 (d,  $J = 2.6$  Hz, 1H), 5.81 (ddd,  $J = 16.9, 9.5, 8.4$  Hz, 1H), 5.32 (dd,  $J = 17.0, 1.8$  Hz, 1H), 5.24 (dd,  $J = 9.9, 1.8$  Hz, 1H), 4.25 – 4.12 (m, 1H), 3.95 – 3.84 (m, 2H), 3.80 (s, 3H), 3.09 (ddd,  $J = 17.8, 12.6, 5.9$  Hz, 1H), 2.67 – 2.56 (m, 1H), 2.29 (dd,  $J = 13.2, 12.9$  Hz, 1H), 2.09 (dd,  $J = 13.4, 5.8$  Hz, 1H);  $^{13}\text{C NMR}$  (100 MHz,  $\text{CDCl}_3$ )  $\delta$  159.4, 152.8, 140.1, 136.2, 129.0, 128.7, 127.9(0), 127.8(7), 124.4, 121.0, 117.5(0), 117.4(5), 113.2(2), 113.1(9), 96.7, 59.4, 55.4, 39.2, 37.6, 29.2; **HRMS** (EI-TOF)  $m/z$ :  $[\text{M}]^+$  calcd for  $\text{C}_{20}\text{H}_{20}\text{O}_3$ : 308.1407, found: 308.1414;  $[\alpha]_{\text{D}}^{25} = +14.0$  ( $c$  0.20,  $\text{CH}_2\text{Cl}_2$ ); **HPLC** (Chiralcel OJ-H,  $n$ -hexane/ethanol = 99/1, flow rate = 1.0 mL/min,  $\lambda = 220$  nm)  $t_{\text{R}} = 11.511$  min (*trans*-minor), 13.177 min (*cis*-major), 24.047 min (*trans*-major), 29.947 min (*cis*-minor).

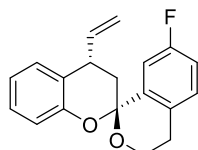

**(2R,4S)-7-Fluoro-4-vinylspiro[chromane-2,1'-isochromane] (3s)**: Following the general procedure **A**,  $\text{CF}_3\text{CO}_2\text{H}$  (4.6  $\mu\text{L}$ /6.8 mg, 18 mg, 0.06 mmol, 0.2 equiv) was used instead of  $(\text{PhSO}_2)_2\text{NH}$ , compound **3s** was obtained as a white solid in 85% yield of the diastereomeric mixtures (75.5 mg), 13:1 dr and >99% ee;  $R_{\text{f}} = 0.6$  (petroleum ether/EtOAc = 10/1), m.p: 108 – 110  $^{\circ}\text{C}$ ;  $^1\text{H NMR}$  (400 MHz,  $\text{CDCl}_3$ )  $\delta$  7.30 – 7.09 (m, 4H), 6.98 (m, 2H), 7.05 – 6.91 (d,  $J = 8.1$  Hz, 1H), 5.81 (ddd,  $J = 17.2, 9.5, 8.4$  Hz, 1H), 5.33 (dd,  $J = 17.2, 1.9$  Hz, 1H), 5.26 (dd,  $J = 10.0, 1.9$  Hz, 1H), 4.22 – 4.07 (m, 1H), 4.02 – 3.79 (m, 2H), 3.04 – 2.96 (ddd,  $J = 17.8, 12.5, 5.6$  Hz, 1H), 2.64 (m, 1H), 2.24 (dd,  $J = 12.9, 12.8$  Hz, 1H), 2.11 (dd,  $J = 13.3, 5.8$  Hz, 1H);  $^{13}\text{C NMR}$  (100 MHz,  $\text{CDCl}_3$ )  $\delta$  161.6 (d, C-F,  $^1J_{\text{C-F}} = 244.7$  Hz), 152.4, 139.8, 138.1 (d, C-F,  $^3J_{\text{C-F}} = 6.7$  Hz), 130.4, 130.3, 128.7, 128.0, 124.3, 121.2, 117.8, 117.4, 115.8 (d, C-F,  $^2J_{\text{C-F}}$ ).

$F = 21.6$  Hz), 113.4 (d, C-F,  $^2J_{C-F} = 22.3$  Hz), 96.4, 59.6, 39.1, 37.4, 28.1;  $^{19}\text{F NMR}$  (376 MHz,  $\text{CDCl}_3$ )  $\delta$  -115.09 – -115.25 (m). **HRMS** (EI-TOF)  $m/z$ :  $[\text{M}]^+$  calcd for  $\text{C}_{19}\text{H}_{17}\text{FO}_2$ : 296.1207, found: 296.1216;  $[\alpha]_{\text{D}}^{25} = +46.0$  ( $c$  0.20,  $\text{CH}_2\text{Cl}_2$ ); **HPLC** (Chiralcel OJ-H,  $n$ -hexane/ethanol = 99/1, flow rate = 1.0 mL/min,  $\lambda = 220$  nm)  $t_{\text{R}} = 5.844$  min (minor), 7.238 min (major).

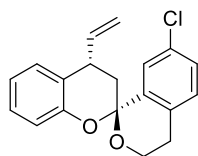

**(2R,4S)-7'-Chloro-4-vinylspiro[chromane-2,1'-isochromane] (3t)**: Following the general procedure A,  $\text{CF}_3\text{CO}_2\text{H}$  (4.6  $\mu\text{L}$ /6.8 mg, 18 mg, 0.06 mmol, 0.2 equiv) was used instead of  $(\text{PhSO}_2)_2\text{NH}$ , compound **3t** was obtained as a white solid in 80% yield of the diastereomeric mixtures (74.5 mg), 12:1 dr and >99% ee;  $R_{\text{f}} = 0.6$  (petroleum ether/EtOAc = 10/1), m.p: 137 – 139  $^{\circ}\text{C}$ ;  $^1\text{H NMR}$  (400 MHz,  $\text{CDCl}_3$ )  $\delta$  7.38 (s, 1H), 7.28 – 7.21 (m, 2H), 7.18 – 7.09 (m, 2H), 6.99 – 6.92 (m, 1H), 6.86 (d,  $J = 8.1$  Hz, 1H), 5.81 (ddd,  $J = 17.2, 9.5, 8.4$  Hz, 1H), 5.33 (dd,  $J = 17.0, 1.8$  Hz, 1H), 5.26 (dd,  $J = 10.0, 1.8$  Hz, 1H), 4.18 – 4.08 (m, 1H), 3.99 – 3.82 (m, 2H), 3.05 (ddd,  $J = 17.7, 12.4, 5.9$  Hz, 1H), 2.73 – 2.57 (m, 1H), 2.26 (dd,  $J = 12.9, 12.8$  Hz, 1H), 2.10 (dd,  $J = 13.3, 5.8$  Hz, 1H);  $^{13}\text{C NMR}$  (100 MHz,  $\text{CDCl}_3$ )  $\delta$  152.4, 139.8, 138.1, 133.1, 132.5, 130.2, 128.7(1), 128.6(7), 128.0, 126.9, 124.3, 121.3, 117.8, 117.4, 96.3, 59.4, 39.1, 37.4, 28.3. **HRMS** (EI-TOF)  $m/z$ :  $[\text{M}]^+$  calcd for  $\text{C}_{19}\text{H}_{17}^{35}\text{ClO}_2$ : 312.0912, found: 312.0919;  $\text{C}_{19}\text{H}_{17}^{37}\text{ClO}_2$ : 314.0883, found: 314.0887;  $[\alpha]_{\text{D}}^{25} = +25.0$  ( $c$  0.20,  $\text{CH}_2\text{Cl}_2$ ); **HPLC** (Chiralcel OJ-H,  $n$ -hexane/ethanol = 99/1, flow rate = 1.0 mL/min,  $\lambda = 220$  nm)  $t_{\text{R}} = 5.741$  min (minor), 7.162 min (major).

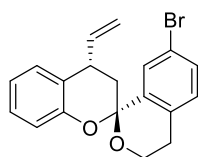

**(2R,4S)-7'-Bromo-4-vinylspiro[chromane-2,1'-isochromane] (3u)**: Following the general procedure A,  $\text{CF}_3\text{CO}_2\text{H}$  (4.6  $\mu\text{L}$ /6.8 mg, 18 mg, 0.06 mmol, 0.2 equiv) was used instead of  $(\text{PhSO}_2)_2\text{NH}$ , compound **3u** was obtained as a white solid in 79% yield of the diastereomeric mixtures (83.4 mg), 12:1 dr and 94% ee;  $R_{\text{f}} = 0.6$  (petroleum ether/EtOAc = 10/1), m.p: 190 – 192  $^{\circ}\text{C}$ ;  $^1\text{H NMR}$  (400 MHz,  $\text{CDCl}_3$ )  $\delta$  7.53 (d,  $J = 2.0$  Hz, 1H), 7.42 (dd,  $J = 8.2, 2.1$  Hz, 1H), 7.24 (d,  $J = 9.9$  Hz, 1H), 7.19 – 7.12 (m, 1H), 7.08 (d,  $J = 8.1$  Hz, 1H), 7.00 – 6.92 (m, 1H), 6.86 (dd,  $J = 8.1, 1.3$  Hz, 1H), 5.81 (ddd,  $J = 17.0, 9.6, 8.4$  Hz, 1H), 5.33 (dd,  $J = 17.0, 1.8$  Hz, 1H), 5.26 (dd,  $J = 9.9, 1.8$  Hz, 1H), 4.14 (ddd,  $J = 12.4, 11.3, 2.9$  Hz, 1H), 3.98 – 3.83 (m, 2H), 3.03 (ddd,  $J = 17.3, 12.3, 5.9$  Hz, 1H), 2.69 – 2.59 (m, 1H), 2.25 (dd,  $J = 13.3, 12.9$  Hz, 1H),

2.10 (dd,  $J = 13.3, 5.9$  Hz, 1H);  $^{13}\text{C}$  NMR (100 MHz,  $\text{CDCl}_3$ )  $\delta$  152.4, 139.8, 138.5, 133.6, 131.6, 130.5, 129.8, 128.7, 128.0, 124.3, 121.3, 120.4, 117.8, 117.4, 96.2, 59.3, 39.1, 37.4, 28.4; **HRMS** (EI-TOF)  $m/z$ :  $[\text{M}]^+$  calcd for  $\text{C}_{19}\text{H}_{17}^{79}\text{BrO}_2$ : 356.0406, found: 356.0411;  $\text{C}_{19}\text{H}_{17}^{81}\text{BrO}_2$ : 358.0386, found: 358.0396;  $[\alpha]_{\text{D}}^{25} = +16.0$  ( $c$  0.20,  $\text{CH}_2\text{Cl}_2$ ); **HPLC** (Chiralcel OJ-H,  $n$ -hexane/ethanol = 99/1, flow rate = 1.0 mL/min,  $\lambda = 220$  nm)  $t_{\text{R}} = 6.113$  min (minor), 7.722 min (major).

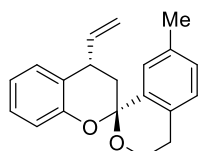

**(2R,4S)-7'-Methyl-4-vinylspiro[chromane-2,1'-isochromane] (3v)**: Following the general procedure A,  $\text{CF}_3\text{CO}_2\text{H}$  (4.6  $\mu\text{L}$ /6.8 mg, 18 mg, 0.06 mmol, 0.2 equiv) was used instead of  $(\text{PhSO}_2)_2\text{NH}$ , compound **3v** was obtained as a white solid in 85% yield of the diastereomeric mixtures (78.8 mg), 16:1 dr and >99% ee;  $R_f = 0.6$  (petroleum ether/EtOAc = 10/1), m.p: 140 – 142  $^\circ\text{C}$ ;  $^1\text{H}$  NMR (400 MHz,  $\text{CDCl}_3$ )  $\delta$  7.19 – 7.10 (m, 2H), 7.03 – 6.97 (m, 3H), 6.89 – 6.82 (m, 1H), 6.79 (d,  $J = 8.1$  Hz, 1H), 5.74 (ddd,  $J = 17.2, 9.6, 8.4$  Hz, 1H), 5.24 (dd,  $J = 17.0, 1.9$  Hz, 1H), 5.16 (dd,  $J = 9.9, 1.9$  Hz, 1H), 4.13 – 4.02 (m, 1H), 3.89 – 3.75 (m, 2H), 2.97 (ddd,  $J = 17.8, 12.6, 6.0$  Hz, 1H), 2.57 – 2.47 (m, 1H), 2.33 – 2.16 (m, 4H), 2.02 (dd,  $J = 13.2, 5.6$  Hz, 1H);  $^{13}\text{C}$  NMR (100 MHz,  $\text{CDCl}_3$ )  $\delta$  152.7, 140.1, 136.5, 136.2, 131.6, 129.4, 128.7(3), 128.6(8), 127.9, 127.0, 124.5, 121.0, 117.5, 117.4, 96.8, 59.7, 39.2, 37.5, 28.5, 21.4; **HRMS** (EI-TOF)  $m/z$ :  $[\text{M}]^+$  calcd for  $\text{C}_{20}\text{H}_{20}\text{O}_2$ : 292.1458, found: 292.1467;  $[\alpha]_{\text{D}}^{25} = +26.0$  ( $c$  0.20,  $\text{CH}_2\text{Cl}_2$ ); **HPLC** (Chiralcel OJ-H,  $n$ -hexane/ethanol = 99/1, flow rate = 1.0 mL/min,  $\lambda = 220$  nm)  $t_{\text{R}} = 4.938$  min (minor), 7.344 min (major).

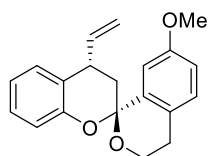

**(2R,4S)-7'-Methoxy-4-vinylspiro[chromane-2,1'-isochromane] (3w)**: Following the general procedure A,  $\text{CF}_3\text{CO}_2\text{H}$  (4.6  $\mu\text{L}$ /6.8 mg, 18 mg, 0.06 mmol, 0.2 equiv) was used instead of  $(\text{PhSO}_2)_2\text{NH}$ , compound **3w** was obtained as a white solid in 87% yield of the diastereomeric mixtures (80.4 mg), 16:1 dr and 96% ee;  $R_f = 0.6$  (petroleum ether/EtOAc = 10/1), m.p: 98 – 100  $^\circ\text{C}$ ;  $^1\text{H}$  NMR (400 MHz,  $\text{CDCl}_3$ )  $\delta$  7.27 – 7.22 (m, 1H), 7.18 – 7.06 (m, 2H), 6.99 – 6.92 (m, 1H), 6.91 – 6.85 (m, 3H), 5.82 (ddd,  $J = 16.7, 9.6, 8.5$  Hz, 1H), 5.33 (dd,  $J = 17.0, 2.0$  Hz, 1H), 5.25 (dd,  $J = 9.9, 1.9$  Hz, 1H), 4.13 (ddd,  $J = 13.7, 8.4, 2.8$  Hz, 1H), 3.90 (ddd,  $J = 13.9, 9.7, 5.4$  Hz, 2H), 3.77 (s, 3H), 3.02 (ddd,  $J = 15.2, 12.6, 5.8$  Hz, 1H), 2.63 – 2.55 (m, 1H), 2.29

(dd,  $J = 13.2, 12.5$  Hz, 1H), 2.11 (dd,  $J = 12.7, 5.2$  Hz, 1H);  $^{13}\text{C}$  NMR (100 MHz,  $\text{CDCl}_3$ )  $\delta$  158.5, 152.7, 140.0, 137.2, 129.8, 128.7, 127.9, 126.7, 124.4, 121.1, 117.6, 117.5, 115.2, 111.1, 96.8, 59.8, 55.5, 39.3, 37.5, 28.0; **HRMS** (EI-TOF)  $m/z$ :  $[\text{M}]^+$  calcd for  $\text{C}_{20}\text{H}_{20}\text{O}_3$ :308.1412, found: 308.1414;  $[\alpha]_{\text{D}}^{25} = +36.0$  ( $c$  0.20,  $\text{CH}_2\text{Cl}_2$ ); **HPLC** (Chiralcel OJ-H,  $n$ -hexane/ethanol = 99/1, flow rate = 1.0 mL/min,  $\lambda = 220$  nm)  $t_{\text{R}} = 7.519$  min (*trans*-minor), 8.690 min (*cis*-major), 10.342 min (*trans*-major), 18.356 min (*cis*-minor).

#### 4. General procedure and characterization data for bisbenzannulated spiroaminals **5**

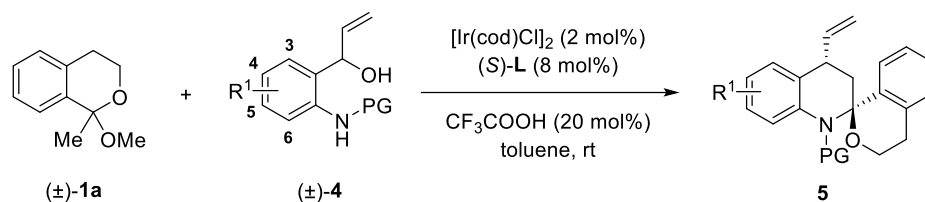

**General procedure B:** Under a nitrogen atmosphere, a flame dried 10 mL Schlenk tube was charged with  $[\text{Ir}(\text{cod})\text{Cl}]_2$  (2.7 mg, 0.004 mmol, 2 mol%), Carreira's ligand (*S*)-**L** (8.1 mg, 0.016 mmol, 8 mol%). After the tube was evacuated and backfilled with nitrogen, freshly distilled toluene (2.0 mL) was added, then stirred at room temperature for 15 minutes while the solution turned dark red. Then, 2-(1-hydroxyallyl)anilines ( $\pm$ )-**4** (0.4 mmol, 2.0 equiv) were added and the reaction mixture immediately turned light yellow. Isochroman ketals ( $\pm$ )-**1a** (35.6 mg, 0.2 mmol, 1.0 equiv) and  $\text{CF}_3\text{CO}_2\text{H}$  (4.6 mg, 0.04 mmol, 0.2 equiv) were added sequentially. The reaction mixture was stirred at room temperature for 24 h, which was directly purified by silica gel flash column chromatography (petroleum ether/EtOAc = 10/1) to afford bisbenzannulated spiroaminals **5**.

Corresponding racemic products rac-**5** were prepared according to the general procedure **B** using racemic ligand which had the same skeleton with (*S*)-**L**.

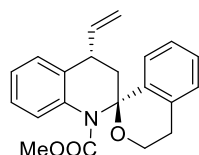

**Methyl (1*S*,4'*S*)-4'-vinyl-3',4'-dihydro-1'*H*-spiro[isochromane-1,2'-quinoline]-1'-carboxylate (**5a**):** Following the general procedure **B**, compound **5a** was obtained as a colorless oil in 76% yield of the diastereomeric mixtures (51.0 mg), 6:1 dr and 99% ee;  $R_f = 0.4$  (petroleum ether/EtOAc = 10/1);  $^1\text{H NMR}$  (400 MHz,  $\text{CDCl}_3$ )  $\delta$  7.44 (dd,  $J = 8.2, 1.2$  Hz, 1H), 7.24 – 7.17 (m, 3H), 7.16 – 7.12 (m, 2H), 7.11 – 7.04 (m, 1H), 7.05 – 7.03 (m, 1H), 5.88 (ddd,  $J = 16.9, 10.5, 8.9$  Hz, 1H), 5.34 – 5.28 (m, 2H), 4.25 – 4.11 (m, 2H), 3.78 (ddd,  $J = 12.1, 8.9, 2.7$  Hz, 1H), 3.60 (s, 3H), 3.13 (ddd,  $J = 14.7, 9.0, 4.9$  Hz, 1H), 2.73 (dt,  $J = 15.8, 4.2$  Hz, 1H), 2.45 (dd,  $J = 13.6, 2.9$  Hz, 1H), 1.73 (dd,  $J = 13.6, 12.4$  Hz, 1H);  $^{13}\text{C NMR}$  (100 MHz,  $\text{CDCl}_3$ )  $\delta$  155.2, 140.3, 138.3, 137.8, 134.7(2), 134.7(0), 127.9, 127.0, 126.6, 126.5, 125.3, 124.5, 123.7, 123.4, 117.8, 87.9, 62.5, 52.7, 46.3, 37.7, 28.6; **HRMS** (EI-TOF)  $m/z$ :  $[\text{M}]^+$  calcd for  $\text{C}_{21}\text{H}_{21}\text{NO}_3$ : 335.1516, found: 335.1519;  $[\alpha]_D^{25} = +29.3$  ( $c$  0.80,  $\text{CH}_2\text{Cl}_2$ ); **HPLC** (Chiralpak IB, *n*-hexane/isopropanol = 99/1, flow rate = 1.0 mL/min,  $\lambda = 220$  nm)  $t_R = 8.224$  min (*cis*-major),

8.704 min (*trans*-major), 9.729 min (*cis*-minor), 10.795 min (*trans*-minor).

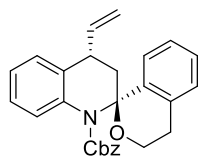

**Benzyl** (1*S*,4'*S*)-4'-vinyl-3',4'-dihydro-1'*H*-spiro[isochromane-1,2'-quinoline]-1'-carboxylate (**5b**): Following the general procedure **B**, compound **5b** was obtained as a colorless oil in 60% yield of the diastereomeric mixtures (49.4 mg), 6:1 dr and 99% ee;  $R_f = 0.4$  (petroleum ether/EtOAc = 10/1);  $^1\text{H NMR}$  (400 MHz,  $\text{CDCl}_3$ )  $\delta$  7.55 (dd,  $J = 8.2, 1.2$  Hz, 1H), 7.25 – 7.20 (m, 4H), 7.21 – 7.12 (m, 3H), 7.11 – 7.03 (m, 2H), 7.02 – 6.96 (m, 1H), 6.97 – 6.91 (m, 2H), 5.86 (ddd,  $J = 17.0, 10.4, 8.8$  Hz, 1H), 5.34 – 5.26 (m, 2H), 5.10 – 4.98 (m, 2H), 4.08 (dd,  $J = 7.1, 4.2$  Hz, 2H), 3.78 (ddd,  $J = 12.1, 8.8, 2.7$  Hz, 1H), 2.83 – 2.66 (m, 1H), 2.56 (dt,  $J = 15.8, 4.2$  Hz, 1H), 2.44 (dd,  $J = 13.7, 2.8$  Hz, 1H), 1.72 (dd,  $J = 13.7, 12.3$  Hz, 1H);  $^{13}\text{C NMR}$  (100 MHz,  $\text{CDCl}_3$ )  $\delta$  155.0, 140.5, 138.3, 137.8, 135.8, 134.8, 134.5, 128.4 (2C), 128.2, 128.0(1) (2C), 128.0(0), 126.9, 126.6, 126.4, 125.2, 124.5, 123.9, 123.3, 117.7, 87.9, 67.6, 62.2, 46.3, 37.6, 28.3; **HRMS** (EI-TOF)  $m/z$ :  $[\text{M}]^+$  calcd for  $\text{C}_{27}\text{H}_{25}\text{NO}_3$ : 411.1829, found: 411.1833;  $[\alpha]_{\text{D}}^{25} = +48.8$  ( $c$  0.40,  $\text{CH}_2\text{Cl}_2$ ); **HPLC** (Chiralpak IB, *n*-hexane/isopropanol = 99/1, flow rate = 1.0 mL/min,  $\lambda = 220$  nm)  $t_{\text{R}} = 9.578$  min (*cis*-major), 10.403 min (*trans*-major), 11.905 min (*cis*-minor), 13.504 min (*trans*-minor).

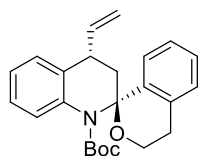

**tert-Butyl** (1*S*,4'*S*)-4'-vinyl-3',4'-dihydro-1'*H*-spiro[isochromane-1,2'-quinoline]-1'-carboxylate (**5c**): Following the general procedure **B**, compound **5c** was obtained as a colorless oil in 63% yield of the diastereomeric mixtures (47.6 mg), 4:1 dr and 99% ee;  $R_f = 0.6$  (petroleum ether/EtOAc = 15/1);  $^1\text{H NMR}$  (400 MHz,  $\text{CDCl}_3$ )  $\delta$  7.52 (dd,  $J = 8.3, 1.2$  Hz, 1H), 7.20 – 7.12 (m, 4H), 7.15 – 7.08 (m, 2H), 7.03 – 6.98 (m, 1H), 5.83 (ddd,  $J = 17.0, 10.1, 8.9$  Hz, 1H), 5.34 – 5.23 (m, 2H), 4.28 – 4.18 (m, 1H), 4.19 – 4.13 (m, 1H), 3.78 (ddd,  $J = 12.4, 8.8, 3.1$  Hz, 1H), 3.05 (ddd,  $J = 16.0, 7.9, 5.1$  Hz, 1H), 2.79 (dt,  $J = 15.9, 5.1$  Hz, 1H), 2.39 (dd,  $J = 13.6, 3.3$  Hz, 1H), 1.74 (dd,  $J = 13.7, 12.5$  Hz, 1H), 1.24 (s, 9H);  $^{13}\text{C NMR}$  (100 MHz,  $\text{CDCl}_3$ )  $\delta$  154.3, 141.1, 139.0, 138.3, 133.7, 133.1, 128.2, 126.8, 126.6, 126.3, 125.8, 124.6, 123.3, 122.5, 117.5, 87.1, 81.3, 61.7, 46.0, 37.7, 28.6, 28.0 (3C); **HRMS** (EI-TOF)  $m/z$ :  $[\text{M}]^+$  calcd for  $\text{C}_{24}\text{H}_{27}\text{NO}_3$ : 377.1986, found: 377.1988;  $[\alpha]_{\text{D}}^{25} = +59.2$  ( $c$  0.40,  $\text{CH}_2\text{Cl}_2$ ); **HPLC** (Chiralpak IF, *n*-hexane/isopropanol = 99.5/0.5, flow rate = 1.0 mL/min,  $\lambda = 220$  nm)  $t_{\text{R}} = 4.471$  min (*trans*-

major), 4.846 min (*trans*-minor), 5.169 min (*cis*-major), 5.552 min (*cis*-minor).

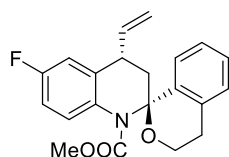

**Methyl (1*S*,4'*S*)-6'-fluoro-4'-vinyl-3',4'-dihydro-1'*H*-spiro[isochromane-1,2'-quinoline]-1'-carboxylate (5d):** Following the general procedure **B**, compound **5d** was obtained as a colorless oil in 54% yield of the diastereomeric mixtures (38.2 mg), 7:1 dr and 99% ee;  $R_f = 0.4$  (petroleum ether/EtOAc = 10/1);  $^1\text{H NMR}$  (400 MHz,  $\text{CDCl}_3$ )  $\delta$  7.46 – 7.38 (m, 1H), 7.18 (d,  $J = 1.6$  Hz, 1H), 7.16 – 7.10 (m, 2H), 7.04 – 6.98 (m, 1H), 6.93 – 6.88 (m, 2H), 5.89 – 5.76 (m, 1H), 5.37 – 5.28 (m, 2H), 4.24 – 4.11 (m, 2H), 3.80 – 3.72 (m, 1H), 3.59 (s, 3H), 3.18 – 3.07 (m, 1H), 2.72 (dt,  $J = 15.8, 4.2$  Hz, 1H), 2.45 (dd,  $J = 13.7, 2.8$  Hz, 1H), 1.71 (dd,  $J = 13.7, 12.3$  Hz, 1H);  $^{13}\text{C NMR}$  (100 MHz,  $\text{CDCl}_3$ )  $\delta$  158.9 (d,  $^1J_{\text{C-F}} = 243.1$  Hz), 155.1, 140.0, 137.5, 137.0 (d,  $^3J_{\text{C-F}} = 7.0$  Hz), 134.6, 133.7 (d,  $^4J_{\text{C-F}} = 2.9$  Hz), 128.0, 127.1, 126.7, 125.1 (d,  $^3J_{\text{C-F}} = 8.1$  Hz), 124.4, 118.5, 113.1 (d,  $^2J_{\text{C-F}} = 22.6$  Hz), 112.0 (d,  $^2J_{\text{C-F}} = 23.6$  Hz), 87.8, 62.5, 52.7, 46.1, 37.7, 28.6;  $^{19}\text{F NMR}$  (376 MHz,  $\text{CDCl}_3$ )  $\delta$  -119.51 – -119.61 (m); **HRMS** (EI-TOF)  $m/z$ :  $[\text{M}]^+$  calcd for  $\text{C}_{21}\text{H}_{20}\text{FNO}_3$ : 353.1422, found: 353.1430;  $[\alpha]_{\text{D}}^{25} = +15.8$  ( $c$  0.40,  $\text{CH}_2\text{Cl}_2$ ); **HPLC** (Chiralpak IG, *n*-hexane/ethanol = 99/1, flow rate = 1.0 mL/min,  $\lambda = 220$  nm)  $t_{\text{R}} = 7.411$  min (*trans*-major), 8.765 min (*trans*-minor), 9.178 min (*cis*-minor), 14.895 min (*cis*-major).

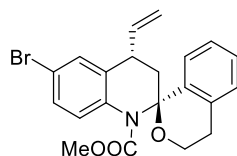

**Methyl (1*S*,4'*S*)-6'-bromo-4'-vinyl-3',4'-dihydro-1'*H*-spiro[isochromane-1,2'-quinoline]-1'-carboxylate (5e):** Following the general procedure **B**, compound **5e** was obtained as a colorless oil in 42% yield of the diastereomeric mixtures (34.8 mg), 4:1 dr and 98% ee;  $R_f = 0.4$  (petroleum ether/EtOAc = 10/1);  $^1\text{H NMR}$  (400 MHz,  $\text{CDCl}_3$ )  $\delta$  7.36 – 7.32 (m, 2H), 7.30 (d,  $J = 1.9$  Hz, 1H), 7.19 – 7.14 (m, 2H), 7.13 – 7.10 (m, 1H), 7.03 – 6.96 (m, 1H), 5.82 (ddd,  $J = 16.5, 10.6, 8.8$  Hz, 1H), 5.37 – 5.28 (m, 2H), 4.25 – 4.02 (m, 2H), 3.82 – 3.70 (m, 1H), 3.58 (s, 3H), 3.11 (ddd,  $J = 14.6, 9.0, 4.9$  Hz, 1H), 2.72 (dt,  $J = 15.8, 4.2$  Hz, 1H), 2.43 (dd,  $J = 13.7, 2.9$  Hz, 1H), 1.72 (dd,  $J = 13.7, 12.4$  Hz, 1H);  $^{13}\text{C NMR}$  (100 MHz,  $\text{CDCl}_3$ )  $\delta$  155.0, 139.8, 137.4, 136.9, 136.8, 134.6, 129.5, 128.3, 128.0, 127.1, 126.7, 125.3, 124.3, 118.6, 116.5, 87.8, 62.5, 52.8, 46.0, 37.6, 28.5; **HRMS** (EI-TOF)  $m/z$ :  $[\text{M}]^+$  calcd for  $\text{C}_{21}\text{H}_{20}^{79}\text{BrNO}_3$ : 413.0622, found: 413.0624;  $\text{C}_{21}\text{H}_{20}^{81}\text{BrNO}_3$ : 415.0601, found: 415.0608;  $[\alpha]_{\text{D}}^{25} = +13.8$  ( $c$  0.40,  $\text{CH}_2\text{Cl}_2$ ); **HPLC** (Chiralcel OJ-H, *n*-hexane/ethanol = 95/5, flow rate = 1.0 mL/min,  $\lambda = 220$  nm)  $t_{\text{R}} =$



7.342 min (*trans*-minor), 7.728 min (*trans*-major), 8.654 min (*cis*-minor), 10.667 min (*cis*-major).

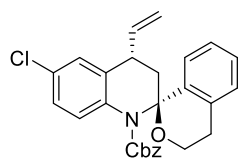

**Benzyl (1*S*,4'*S*)-6'-chloro-4'-vinyl-3',4'-dihydro-1'*H*-spiro[isochromane-1,2'-quinoline]-1'-carboxylate (5f):** Following the general procedure **B**, compound **5f** was obtained as a white solid in 54% yield of the diastereomeric mixtures (48.2 mg, 5:1 dr and 99% ee;  $R_f = 0.5$  (petroleum ether/EtOAc = 10/1); m.p: 109 – 111 °C;  $^1\text{H NMR}$  (400 MHz,  $\text{CDCl}_3$ )  $\delta$  7.54 – 7.47 (m, 1H), 7.25 – 7.22 (m, 3H), 7.18 – 7.14 (m, 4H), 7.04 – 6.96 (m, 2H), 6.95 – 6.91 (m, 2H), 5.81 (ddd,  $J = 16.6, 10.7, 8.7$  Hz, 1H), 5.36 – 5.27 (m, 2H), 5.06 – 4.98 (m, 2H), 4.06 (dd,  $J = 7.1, 4.2$  Hz, 2H), 3.75 (ddd,  $J = 12.0, 8.7, 2.7$  Hz, 1H), 2.80 – 2.65 (m, 1H), 2.55 (dt,  $J = 15.9, 4.2$  Hz, 1H), 2.43 (dd,  $J = 13.8, 2.9$  Hz, 1H), 1.70 (dd,  $J = 13.7, 12.4$  Hz, 1H);  $^{13}\text{C NMR}$  (100 MHz,  $\text{CDCl}_3$ )  $\delta$  154.7, 140.1, 137.5, 136.5, 136.4, 135.6, 134.4, 128.7, 128.4 (2C), 128.3, 128.1(8), 128.1(5) (2C), 127.0, 126.7, 126.4, 125.3, 125.1, 124.3, 118.6, 87.8, 67.8, 62.2, 46.0, 37.5, 28.2; **HRMS** (EI-TOF)  $m/z$ :  $[\text{M}]^+$  calcd for  $\text{C}_{27}\text{H}_{24}^{35}\text{ClNO}_3$ : 445.1440, found: 445.1443;  $\text{C}_{27}\text{H}_{24}^{37}\text{ClNO}_3$ : 447.1410, found: 447.1412;  $[\alpha]_{\text{D}}^{25} = +47.5$  ( $c$  0.20,  $\text{CH}_2\text{Cl}_2$ ); **HPLC** (Chiralpak IG, *n*-hexane/isopropanol = 95/5, flow rate = 1.0 mL/min,  $\lambda = 220$  nm)  $t_{\text{R}} = 9.902$  min (minor), 11.020 min (major).

**The preparation and X-ray analysis of the single crystal:** Compound **5f** (10.0 mg) was dissolved in 5.0 mL ethanol in a round-bottom flask. A single crystal was obtained after placing at -20 °C for 12 hours. The data set was collected by a Bruker APEX-II CCD at 293(2) K equipped with Mo radiation source ( $K\alpha = 0.71073$  Å). Applied with multi-scan absorption correction, the structure solution was solved and refinement was processed by SHELXTL program package. CCDC 2342944 contains the supplementary crystallographic data, and can be obtained free of charge via [www.ccdc.cam.ac.uk/conts/retrieving.html](http://www.ccdc.cam.ac.uk/conts/retrieving.html).

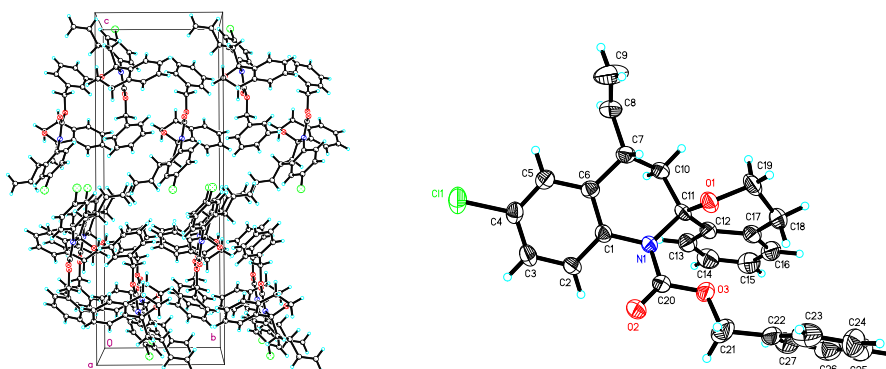

**Fig S2.** The thermal ellipsoid plot for X-ray structure of (1*S*,4'*S*)-**5f** with the ellipsoid contour at 30% probability levels

**Crystal data and structure refinement for (1*S*,4'*S*)-**5f****

|                                   |                                                     |          |
|-----------------------------------|-----------------------------------------------------|----------|
| Identification code               | mo_d8v23612_0m                                      |          |
| Empirical formula                 | C <sub>27</sub> H <sub>24</sub> Cl N O <sub>3</sub> |          |
| Formula weight                    | 445.92                                              |          |
| Temperature                       | 293(2) K                                            |          |
| Wavelength                        | 0.71073 Å                                           |          |
| Crystal system                    | Orthorhombic                                        |          |
| Space group                       | P 21 21 21                                          |          |
| Unit cell dimensions              | a = 8.740(2) Å                                      | α = 90°. |
|                                   | b = 9.775(3) Å                                      | β = 90°. |
|                                   | c = 26.948(6) Å                                     | γ = 90°. |
| Volume                            | 2302.5(10) Å <sup>3</sup>                           |          |
| Z                                 | 4                                                   |          |
| Density (calculated)              | 1.286 Mg/m <sup>3</sup>                             |          |
| Absorption coefficient            | 0.195 mm <sup>-1</sup>                              |          |
| F (000)                           | 936                                                 |          |
| Crystal size                      | 0.150 x 0.100 x 0.060 mm <sup>3</sup>               |          |
| Theta range for data collection   | 2.574 to 26.499 °                                   |          |
| Index ranges                      | -10 ≤ h ≤ 10, -12 ≤ k ≤ 10, -33 ≤ l ≤ 32            |          |
| Reflections collected             | 19725                                               |          |
| Independent reflections           | 4756 [R(int) = 0.0788]                              |          |
| Completeness to theta = 25.242 °  | 99.7 %                                              |          |
| Absorption correction             | Semi-empirical from equivalents                     |          |
| Max. and min. transmission        | 0.7456 and 0.6685                                   |          |
| Refinement method                 | Full-matrix least-squares on F <sup>2</sup>         |          |
| Data / restraints / parameters    | 4756 / 0 / 290                                      |          |
| Goodness-of-fit on F <sup>2</sup> | 1.084                                               |          |
| Final R indices [I > 2σ(I)]       | R1 = 0.0618, wR2 = 0.1205                           |          |
| R indices (all data)              | R1 = 0.1249, wR2 = 0.1488                           |          |
| Absolute structure parameter      | 0.12(5)                                             |          |

|                             |                                    |
|-----------------------------|------------------------------------|
| Extinction coefficient      | 0.0058(18)                         |
| Largest diff. peak and hole | 0.343 and -0.182 e.Å <sup>-3</sup> |

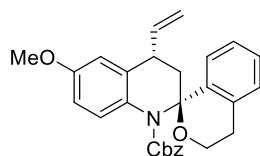

**Benzyl (1S,4'S)-6'-methoxy-4'-vinyl-3',4'-dihydro-1'H-spiro[isochromane-1,2'-quinoline]-1'-carboxylate (5g):** Following the general procedure **B**, compound **5g** was obtained as a colorless oil in 89% yield of the diastereomeric mixtures (78.6 mg), 5:1 dr and 99% ee;  $R_f = 0.4$  (petroleum ether/EtOAc = 5/1);  $^1\text{H NMR}$  (400 MHz,  $\text{CDCl}_3$ )  $\delta$  7.49 (d,  $J = 8.8$  Hz, 1H), 7.24 – 7.21 (m, 3H), 7.18 – 7.13 (m, 2H), 7.10 – 7.03 (m, 1H), 7.00 – 6.97 (m, 1H), 6.96 – 6.93 (m, 2H), 6.78 – 6.72 (m, 2H), 5.91 – 5.78 (m, 1H), 5.33 – 5.27 (m, 2H), 5.08 – 5.00 (m, 2H), 4.07 (dd,  $J = 7.1, 4.1$  Hz, 2H), 3.80 (s, 3H), 3.81 – 3.71 (m, 1H), 2.81 – 2.71 (m, 1H), 2.55 (dt,  $J = 15.9, 4.2$  Hz, 1H), 2.43 (dd,  $J = 13.7, 2.7$  Hz, 1H), 1.70 (dd,  $J = 13.6, 12.3$  Hz, 1H);  $^{13}\text{C NMR}$  (100 MHz,  $\text{CDCl}_3$ )  $\delta$  155.6, 154.9, 140.6, 138.1, 136.5, 136.0, 134.5, 131.0, 128.4 (2C), 128.1, 127.9(7) (2C), 127.9(1), 126.9, 126.6, 125.0, 124.5, 118.0, 111.5, 110.8, 87.9, 67.5, 62.3, 55.6, 46.4, 37.7, 28.3; **HRMS** (EI-TOF)  $m/z$ :  $[\text{M}]^+$  calcd for  $\text{C}_{28}\text{H}_{27}\text{NO}_4$ : 441.1935, found: 441.1938;  $[\alpha]_{\text{D}}^{25} = +38.4$  ( $c$  0.80,  $\text{CH}_2\text{Cl}_2$ ); **HPLC** (Chiralpak IA, *n*-hexane/isopropanol = 97/3, flow rate = 1.0 mL/min,  $\lambda = 220$  nm)  $t_{\text{R}} = 16.775$  min (minor), 19.329 min (major).

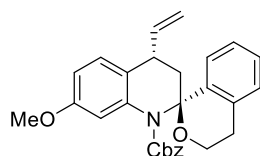

**Benzyl (1S,4'S)-7'-methoxy-4'-vinyl-3',4'-dihydro-1'H-spiro[isochromane-1,2'-quinoline]-1'-carboxylate (5h):** Following the general procedure **B**, compound **5h** was obtained as a colorless oil in 63% yield of the diastereomeric mixtures (55.6 mg), 10:1 dr and 99% ee;  $R_f = 0.3$  (petroleum ether/EtOAc = 10/1);  $^1\text{H NMR}$  (400 MHz,  $\text{CDCl}_3$ )  $\delta$  7.25 – 7.22 (m, 3H), 7.18 – 7.14 (m, 3H), 7.10 – 7.05 (m, 2H), 7.01 – 6.97 (m, 3H), 6.62 (dd,  $J = 8.5, 2.6$  Hz, 1H), 5.82 (ddd,  $J = 17.1, 10.1, 8.9$  Hz, 1H), 5.32 – 5.22 (m, 2H), 5.12 – 4.95 (m, 2H), 4.10 – 4.05 (m, 2H), 3.74 – 3.69 (m, 1H), 3.69 (s, 3H), 2.82 – 2.72 (m, 1H), 2.57 (dt,  $J = 15.8, 4.3$  Hz, 1H), 2.41 (dd,  $J = 13.7, 2.9$  Hz, 1H), 1.70 (dd,  $J = 13.6, 12.3$  Hz, 1H);  $^{13}\text{C NMR}$  (100 MHz,  $\text{CDCl}_3$ )  $\delta$  158.2, 154.8, 140.6, 138.7, 138.5, 135.7, 134.4, 128.4 (2C), 128.2(1), 128.2(0) (2C), 128.0, 126.9(7), 126.9(5), 126.6, 125.9, 124.4, 117.5, 109.5, 109.5, 88.0, 67.7, 62.2, 55.5, 46.3, 37.0, 28.2; **HRMS** (EI-TOF)  $m/z$ :  $[\text{M}]^+$  calcd for  $\text{C}_{28}\text{H}_{27}\text{NO}_4$ : 441.1935, found: 441.1942;  $[\alpha]_{\text{D}}^{25} = +33.8$  ( $c$  0.40,  $\text{CH}_2\text{Cl}_2$ ); **HPLC** (Chiralcel OD-H, *n*-hexane/isopropanol = 97/3, flow rate = 1.0 mL/min,  $\lambda = 220$  nm)  $t_{\text{R}} = 11.286$  min (*cis*-major), 12.543 min (*trans*-major), 17.334 min (*trans*-minor), 20.954 min (*cis*-minor).

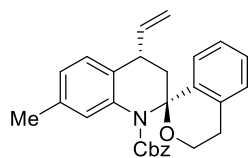

**Benzyl (1S,4'S)-7'-methyl-4'-vinyl-3',4'-dihydro-1'H-spiro[isochromane-1,2'-quinoline]-1'-carboxylate (5i):** Following the general procedure **B**, compound **5i** was obtained as a colorless oil in 69% yield of the diastereomeric mixtures (58.7 mg), 5:1 dr and 99% ee;  $R_f = 0.5$  (petroleum ether/EtOAc = 10/1);  $^1\text{H NMR}$  (400 MHz,  $\text{CDCl}_3$ )  $\delta$  7.35 (s, 1H), 7.25 – 7.23 (m, 3H), 7.18 – 7.13 (m, 2H), 7.09 – 7.04 (m, 2H), 7.01 – 6.97 (m, 3H), 6.88 – 6.85 (m, 1H), 5.84 (ddd,  $J = 17.0, 10.2, 8.8$  Hz, 1H), 5.33 – 5.23 (m, 2H), 5.14 – 4.95 (m, 2H), 4.08 (dd,  $J = 7.0, 4.2$  Hz, 2H), 3.79 – 3.68 (m, 1H), 2.84 – 2.74 (m, 1H), 2.57 (dt,  $J = 15.9, 4.2$  Hz, 1H), 2.42 (dd,  $J = 13.7, 2.8$  Hz, 1H), 2.30 (s, 3H), 1.70 (dd,  $J = 13.6, 12.3$  Hz, 1H);  $^{13}\text{C NMR}$  (100 MHz,  $\text{CDCl}_3$ )  $\delta$  154.9, 140.6, 138.6, 137.5, 136.0, 135.9, 134.5, 131.8, 128.4 (2C), 128.2, 128.1 (2C), 128.0, 126.9, 126.6, 125.1, 124.5(3), 124.5(0), 124.2, 117.5, 87.9, 67.6, 62.2, 46.4, 37.3, 28.3, 21.4; **HRMS** (EI-TOF)  $m/z$ :  $[\text{M}]^+$  calcd for  $\text{C}_{28}\text{H}_{27}\text{NO}_3$ : 425.1986, found: 425.1993;  $[\alpha]_{\text{D}}^{25} = +43.5$  ( $c$  0.40,  $\text{CH}_2\text{Cl}_2$ ); **HPLC** (Chiralpak IC,  $n$ -hexane/ethanol = 99/1, flow rate = 1.0 mL/min,  $\lambda = 220$  nm)  $t_{\text{R}} = 8.310$  min (*cis*-major), 10.121 min (*cis*-minor), 10.879 min (*trans*-major), 13.481 min (*trans*-minor).

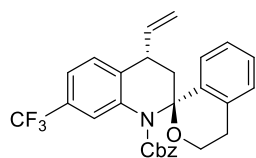

**Benzyl (1S,4'S)-7'-(trifluoromethyl)-4'-vinyl-3',4'-dihydro-1'H-spiro[isochromane-1,2'-quinoline]-1'-carboxylate (5j):** Following the general procedure **B**, compound **5j** was obtained as a colorless oil in 40% yield of the diastereomeric mixtures (38.4 mg), 6:1 dr and 99% ee;  $R_f = 0.5$  (petroleum ether/EtOAc = 10/1);  $^1\text{H NMR}$  (400 MHz,  $\text{CDCl}_3$ )  $\delta$  7.86 (s, 1H), 7.30 – 7.28 (m, 2H), 7.27 – 7.24 (m, 3H), 7.20 – 7.16 (m, 2H), 7.06 – 7.01 (m, 2H), 7.01 – 6.98 (m, 2H), 5.90 – 5.77 (m, 1H), 5.38 – 5.29 (m, 2H), 5.13 – 4.97 (m, 2H), 4.11 – 4.06 (m, 2H), 3.81 (t,  $J = 10.8$  Hz, 1H), 2.83 – 2.74 (m, 1H), 2.58 (dt,  $J = 15.8, 4.3$  Hz, 1H), 2.45 (dd,  $J = 13.8, 2.9$  Hz, 1H), 1.78 – 1.67 (m, 1H);  $^{13}\text{C NMR}$  (100 MHz,  $\text{CDCl}_3$ )  $\delta$  154.5, 139.8, 138.2(9), 138.2(5), 137.5, 135.3, 134.5, 128.6 (q,  $^2J_{\text{C-F}} = 32.0$  Hz), 128.5 (2C), 128.3, 128.2(4) (2C), 128.2(2), 127.1, 126.8, 125.9, 125.5 (q,  $^1J_{\text{C-F}} = 239.0$  Hz), 124.3, 120.9 (q,  $^3J_{\text{C-F}} = 4.1$  Hz), 119.9 (q,  $^3J_{\text{C-F}} = 3.9$  Hz), 118.6, 87.8, 68.1, 62.4, 45.9, 37.6, 28.2;  $^{19}\text{F NMR}$  (376 MHz,  $\text{CDCl}_3$ )  $\delta$  -62.21 (s); **HRMS** (EI-TOF)  $m/z$ :  $[\text{M}]^+$  calcd for  $\text{C}_{28}\text{H}_{24}\text{F}_3\text{NO}_3$ : 479.1703, found: 479.1705;  $[\alpha]_{\text{D}}^{25} = +34.0$  ( $c$  0.40,  $\text{CH}_2\text{Cl}_2$ ); **HPLC** (Chiralpak IB,  $n$ -hexane/isopropanol = 99/1, flow rate = 1.0 mL/min,

$\lambda = 220 \text{ nm}$ )  $t_R = 6.547 \text{ min}$  (*cis*-major),  $6.943 \text{ min}$  (*trans*-major),  $7.835 \text{ min}$  (*trans*-minor),  
 $10.471 \text{ min}$  (*cis*-minor).

## 5. Gram-scale preparation of bisbenzannulated spiroketal **3a**

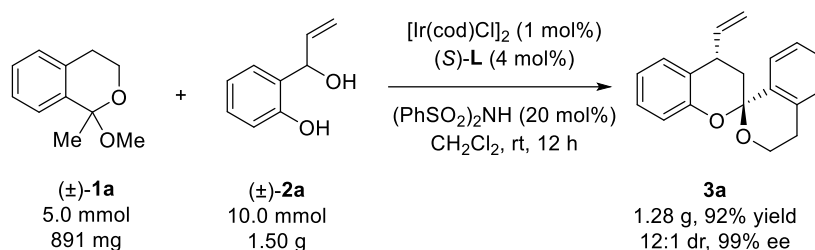

Under a nitrogen atmosphere, a flame dried 100 mL Schlenk tube was charged with  $[\text{Ir}(\text{cod})\text{Cl}]_2$  (34 mg, 0.05 mmol, 1 mol%), Carreira's ligand (*S*)-**L** (102 mg, 0.2 mmol, 4 mol%). After the tube was evacuated and backfilled with nitrogen, freshly distilled  $\text{CH}_2\text{Cl}_2$  (50 mL) was added, then stirred at room temperature for 15 minutes while the solution turned dark red. Then, 2-(1-hydroxyallyl)phenol ( $\pm$ )-**2a** (1.50 g, 10.0 mmol, 2.0 equiv) were added and the reaction mixture immediately turned light yellow. Isochroman ketal **1a** (891 mg, 5.0 mmol, 1.0 equiv) and  $(\text{PhSO}_2)_2\text{NH}$  (300 mg, 1.0 mmol, 0.2 equiv) were added sequentially. The reaction mixture was stirred at room temperature until **1a** were consumed (monitored by TLC), which was directly purified by flash column chromatography silica gel (petroleum ether/EtOAc = 10/1) to afford spiroketal **3a** in 92% yield (1.28 g) with 12:1 dr and 99% ee.

## 6. Synthetic transformations of bisbenzannulated spiroketal **3a**

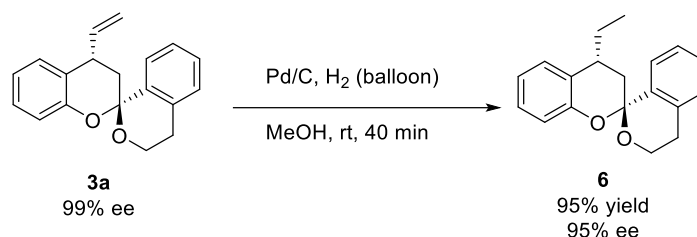

A stirred suspension of compound **3a** (83.4 mg, 0.3 mmol, 1.0 equiv) in MeOH (3.0 mL) and palladium on activated carbon (63.9 mg, 10 mol%) was added. The reaction mixture was stirred under H<sub>2</sub> atmosphere (H<sub>2</sub> balloon) at room temperature for 40 min. The mixture was filtered over SiO<sub>2</sub> and the solvent was removed under reduced pressure. The residue was purified by silica gel flash column chromatography (petroleum ether/EtOAc = 15:1) to afford the title product **6** (79.8 mg, 95% yield, 95% ee) as a white solid.  $R_f$  = 0.8 (petroleum ether/EtOAc = 10/1), m.p: 76 – 78 °C; <sup>1</sup>H NMR (400 MHz, CDCl<sub>3</sub>) δ 7.45 – 7.37 (m, 1H), 7.33 (dd,  $J$  = 7.8, 1.5 Hz, 1H), 7.31 – 7.24 (m, 2H), 7.21 – 7.15 (m, 1H), 7.14 – 7.08 (m, 1H), 6.98 – 6.92 (m, 1H), 6.86 (dd,  $J$  = 8.1, 1.5 Hz, 1H), 4.22 – 4.10 (m, 1H), 3.96 – 3.86 (m, 1H), 3.25 – 3.16 (m, 1H), 3.10 (ddd,  $J$  = 17.5, 12.4, 5.8 Hz, 1H), 2.69 – 2.60 (m, 1H), 2.22 – 2.05 (m, 3H), 1.64 (ddq,  $J$  = 14.1, 9.2, 7.1 Hz, 1H), 0.98 (t,  $J$  = 7.4 Hz, 3H); <sup>13</sup>C NMR (100 MHz, CDCl<sub>3</sub>) δ 153.0, 136.9, 134.6, 128.8, 128.3, 127.2, 126.9, 126.8, 126.7, 126.4, 121.1, 117.6, 97.0, 59.4, 37.7, 31.6, 28.9, 26.2, 10.7; HRMS (EI-TOF)  $m/z$ : [M]<sup>+</sup> calcd for C<sub>19</sub>H<sub>20</sub>O<sub>2</sub>: 280.1458, found: 280.1460;  $[\alpha]_D^{25}$  = –30.0 ( $c$  0.20, CH<sub>2</sub>Cl<sub>2</sub>); HPLC (Chiralcel OJ-H, *n*-hexane/ethanol = 99/1, flow rate = 1.0 mL/min,  $\lambda$  = 220 nm)  $t_R$  = 6.779 min (minor), 9.355 min (major).

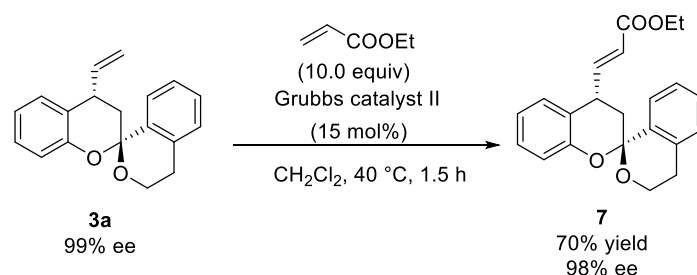

Compound **3a** (83.4 mg, 0.3 mmol, 1.0 equiv), ethyl acrylate (0.3 mL, 3.0 mmol, 10.0 equiv) and Grubbs catalyst II (39.0 mg, 0.045 mmol, 15 mol%) were dissolved in CH<sub>2</sub>Cl<sub>2</sub> (3.0 mL). After stirring at 40 °C for 1.5 h, the reaction mixture was directly purified by silica gel flash column chromatography (petroleum ether/EtOAc = 10:1) to afford the title product **7** as a white solid (73.5 mg, 70% yield, 98% ee).  $R_f$  = 0.3 (petroleum ether/EtOAc = 10/1), m.p: 94 – 96 °C; <sup>1</sup>H NMR (400 MHz, CDCl<sub>3</sub>) δ 7.38 (d,  $J$  = 7.1 Hz, 1H), 7.29 (d,  $J$  = 6.0 Hz, 2H), 7.22 – 7.14 (m, 2H), 7.12 (d,  $J$  = 7.6 Hz, 1H), 7.03 – 6.91 (m, 2H), 6.89 (d,  $J$  = 8.0 Hz, 1H), 6.11 (d,  $J$  = 15.6 Hz, 1H), 4.27 – 4.03 (m, 4H), 3.98 – 3.90 (m, 1H), 3.11 (ddd,  $J$  = 17.8, 12.6, 5.9 Hz, 1H),



2.72 – 2.62 (m, 1H), 2.37 (dd,  $J = 12.9, 12.8$  Hz, 1H), 2.11 (dd,  $J = 13.3, 6.0$  Hz, 1H), 1.31 (t,  $J = 7.0$  Hz, 3H);  $^{13}\text{C NMR}$  (100 MHz,  $\text{CDCl}_3$ )  $\delta$  166.4, 152.6, 149.4, 136.0, 134.6, 128.9, 128.8, 128.6, 128.4, 127.0, 126.6, 123.9, 122.6, 121.3, 117.8, 96.4, 60.6, 59.6, 38.3, 35.9, 28.8, 14.4. **HRMS** (EI-TOF)  $m/z$ :  $[\text{M}]^+$  calcd for  $\text{C}_{22}\text{H}_{22}\text{O}_4$ : 350.1513, found: 350.1516;  $[\alpha]_{\text{D}}^{25} = +69.0$  ( $c$  0.20,  $\text{CH}_2\text{Cl}_2$ ); **HPLC** (Chiralcel OD-H,  $n$ -hexane/ethanol = 90/10, flow rate = 1.0 mL/min,  $\lambda = 220$  nm)  $t_{\text{R}} = 4.930$  min (minor), 6.570 min (major).

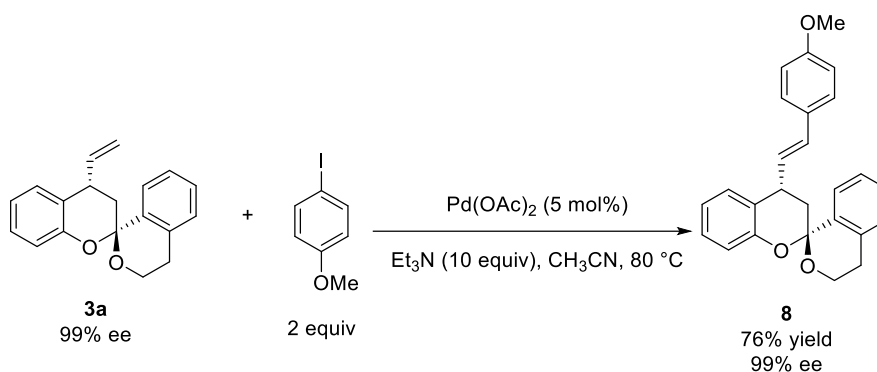

Under nitrogen atmosphere, to a stirring solution of **3a** (83.4 mg, 0.3 mmol, 1.0 equiv) in anhydrous  $\text{CH}_3\text{CN}$  (3.0 mL) were added  $\text{Pd}(\text{OAc})_2$  (2.5 mg, 0.015 mmol, 5 mol%),  $\text{Et}_3\text{N}$  (0.42 mL, 3 mmol, 10 equiv), and 4-iodophenyl methyl ether (140.4 mg, 0.6 mmol, 2 equiv). The mixture was then stirred for 24 hours at 80 °C (oil bath temperature), which was cooled down to room temperature, diluted with water, and extracted with ethyl acetate. The combined organic phases were dried over anhydrous  $\text{Na}_2\text{SO}_4$  and concentrated under reduced pressure. The residue was purified by silica gel flash column chromatography (petroleum ether/ $\text{EtOAc} = 15:1$ ) to give **8** (87.5 mg, 76% yield, 99% ee) as colorless oil.  $R_{\text{f}} = 0.4$  (petroleum ether/ $\text{EtOAc} = 10/1$ );  $^1\text{H NMR}$  (400 MHz,  $\text{CDCl}_3$ )  $\delta$  7.44 – 7.39 (m, 1H), 7.35 (d,  $J = 8.5$  Hz, 2H), 7.31 – 7.25 (m, 3H), 7.22 – 7.12 (m, 2H), 6.96 – 6.91 (m, 1H), 6.90 – 6.83 (m, 3H), 6.63 (d,  $J = 15.7$  Hz, 1H), 6.06 (dd,  $J = 15.7, 9.3$  Hz, 1H), 4.21 (ddd,  $J = 12.3, 11.9, 2.9$  Hz, 1H), 4.04 (ddd,  $J = 14.1, 9.0, 6.0$  Hz, 1H), 3.99– 3.92 (dd,  $J = 11.3, 5.8$  Hz, 1H), 3.81 (s, 3H), 3.13 (ddd,  $J = 17.6, 12.4, 5.8$  Hz, 1H), 2.72 – 2.64 (dd,  $J = 16.5, 2.7$  Hz, 1H), 2.39 (dd,  $J = 13.0, 12.8$  Hz, 1H), 2.16 (dd,  $J = 13.3, 5.8$  Hz, 1H);  $^{13}\text{C NMR}$  (100 MHz,  $\text{CDCl}_3$ )  $\delta$  159.2, 152.8, 136.4, 134.6, 132.1, 130.1, 129.5, 129.0, 128.9, 128.5, 128.0, 127.5 (2C), 126.9, 126.6, 125.0, 121.1, 117.5, 114.2 (2C), 96.8, 59.6, 55.5, 39.5, 36.7, 28.9; **HRMS** (EI-TOF)  $m/z$ :  $[\text{M}]^+$  calcd for  $\text{C}_{26}\text{H}_{24}\text{O}_3$ : 384.1720, found: 384.1723;  $[\alpha]_{\text{D}}^{25} = +50.0$  ( $c$  0.20,  $\text{CH}_2\text{Cl}_2$ ); **HPLC** (Chiralcel OD-H,  $n$ -hexane/ethanol = 99/1, flow rate = 1.0 mL/min,  $\lambda = 220$  nm)  $t_{\text{R}} = 11.990$  min (minor), 37.067 min (major).

## 7. *In-vitro* antifungal activity against four species of pathogenic fungi

*In-vitro* antifungal activities of target compounds against *Rhizoctonia solani* (*R. s.*), *Botrytis cinerea* (*B. c.*), *Sclerotinia sclerotiorum* (*S. s.*), and *Fusarium graminearum* (*F. g.*) which were provided by GreenTech Laboratory, were tested using the mycelium growth rate method. All compounds were tested at 100 mg/L as well as the positive control reagent Spiroxamine. Each compound was dissolved with dimethyl sulfoxide (DMSO) for preparing 1000 mg/L stock solution and diluted with the melted potato dextrose agar (PDA) media to prepared the target concentrations of compounds. A blank control was established by incorporating 0.5% DMSO (v/v) into PDA media. The mycelial disks, with a diameter of 5 mm, from phytopathogenic fungi were placed onto PDA plates and then were incubated at 25 °C under 80% moisturizing conditions in the dark. Diameters (mm) of the colony were measured by the cross-bracketing method. The growth inhibition rates were calculated according to the following formula percentage inhibition (%) = [(C – T)/(C – 5 mm)] × 100, where C and T represent diameters of the colony cultured on blank control and dosed PDA, respectively. Each experiment was conducted three times.

**Table S6:** *In-vitro* antifungal activity against four species of pathogenic fungi.

| compounds | Inhibition Rates (%)/100 mg/L |              |              |              |
|-----------|-------------------------------|--------------|--------------|--------------|
|           | <i>R. s.</i>                  | <i>B. c.</i> | <i>S. s.</i> | <i>F. g.</i> |
| <b>3a</b> | <b>60.5</b>                   | 21.0         | 34.0         | 49.3         |
| <b>3b</b> | 48.8                          | 11.3         | 23.0         | 39.5         |
| <b>3c</b> | 53.9                          | 10.9         | 24.8         | 42.0         |
| <b>3d</b> | 47.6                          | 16.5         | 1.4          | 48.1         |
| <b>3e</b> | 44.8                          | 17.4         | -8.3         | 46.7         |
| <b>3f</b> | <b>61.5</b>                   | 21.0         | -38.2        | 23.8         |
| <b>3g</b> | 36.9                          | 6.4          | -36.7        | 22.0         |
| <b>3h</b> | 50.3                          | 24.4         | 18.0         | 46.7         |
| <b>3i</b> | 37.4                          | 6.4          | -10.6        | 25.9         |
| <b>3j</b> | <b>61.4</b>                   | 8.5          | 26.2         | 42.3         |
| <b>3k</b> | 44.0                          | -2.4         | 35.3         | 11.3         |
| <b>3l</b> | 45.7                          | 9.6          | 15.7         | 11.3         |
| <b>3m</b> | <b>61.1</b>                   | 12.0         | 27.7         | 50.2         |
| <b>3n</b> | 53.1                          | 14.9         | 0.5          | <b>61.4</b>  |
| <b>3o</b> | <b>60.7</b>                   | 24.1         | 30.9         | 51.2         |
| <b>3p</b> | 58.2                          | 33.9         | 36.8         | 55.4         |

|                           |      |       |      |      |
|---------------------------|------|-------|------|------|
| <b>3q</b>                 | 52.6 | 14.7  | 30.9 | 19.1 |
| <b>3r</b>                 | 49.2 | 16.7  | 37.0 | 15.7 |
| <b>3s</b>                 | 30.0 | -15.2 | 20.1 | 0.6  |
| <b>3t</b>                 | 23.2 | -15.4 | 24.8 | 13.2 |
| <b>3u</b>                 | 33.1 | -16.5 | 16.3 | 3.4  |
| <b>3v</b>                 | 49.2 | -8.5  | 29.7 | 16.0 |
| <b>3w</b>                 | 45.7 | 9.2   | 13.4 | 30.1 |
| <b>5a</b>                 | 56.4 | 44.1  | 56.1 | 36.7 |
| <b>5b</b>                 | 0.7  | 17.1  | 7.0  | 19.0 |
| <b>5c</b>                 | 28.6 | 31.4  | 21.0 | 21.4 |
| <b>5d</b>                 | 27.5 | 19.3  | 54.1 | 49.0 |
| <b>5e</b>                 | 48.0 | 24.0  | 29.5 | 25.4 |
| <b>5f</b>                 | 25.7 | 0.7   | 5.6  | 1.5  |
| <b>5g</b>                 | 30.2 | 24.0  | 14.2 | 9.1  |
| <b>5h</b>                 | 11.2 | 14.8  | -5.8 | 14.2 |
| <b>5i</b>                 | 12.6 | 13.6  | 7.4  | 10.9 |
| <b>5j</b>                 | 3.0  | 6.8   | 5.3  | 10.3 |
| <b>6</b>                  | 58.4 | 21.5  | 30.9 | 41.7 |
| <b>7</b>                  | 44.4 | 17.1  | 29.7 | 24.5 |
| <b>8</b>                  | 36.2 | -0.7  | 11.1 | 11.3 |
| <b><i>Spiroxamine</i></b> | 91.3 | 92.6  | 94.9 | 67.1 |

---

## 8. Control experiments for mechanism study

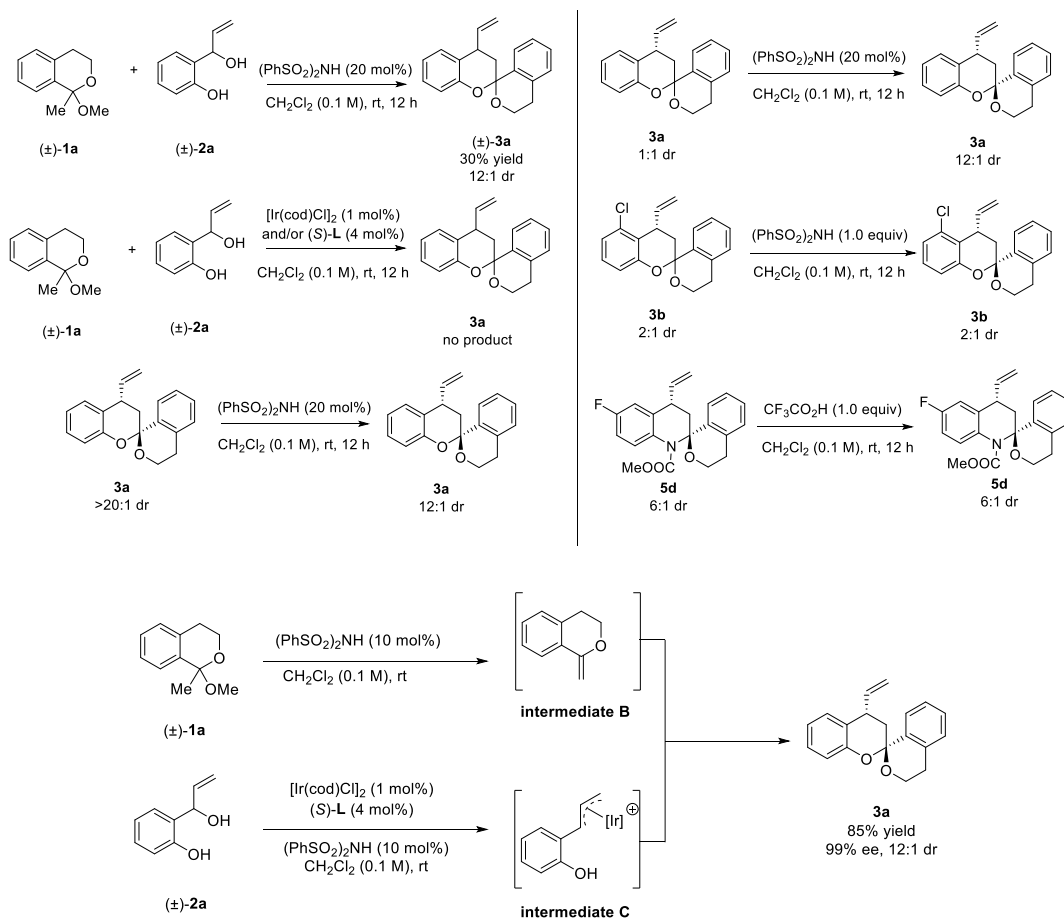

According to our experiment, the intermediate **B** is unstable, and the attempt to separate it was failed. In addition, the intermediate **B** was prepared in advance and used directly in our reaction, affording product **3a** in 85% yield with 99% ee and 12:1 dr. This result revealed that intermediate **B** is indeed generated in this reaction.

## 9. DFT calculations

**Computational details:** All density functional theory (DFT) calculations were performed using Gaussian 16.<sup>[7]</sup> The geometry optimizations and frequencies were calculated using the B3LYP-D3(BJ) hybrid density functional theory<sup>[8]</sup> with 6-31G(d,p) basis set for all elements. Frequency calculations confirmed that optimized structures are minima (no imaginary frequency) or transition structures (one imaginary frequency). To obtain more accurate electronic energies, single-point energy calculations were performed at the M06-2X/def2TZVP level of theory<sup>[9-10]</sup> with the optimized structures. Grimme's quasi-RRHO correction<sup>[11]</sup> for the frequencies that are below 100 cm<sup>-1</sup> and concentration correction for all species (from 1 atm to 1 mol/L) are implemented by the GoodVibes program.<sup>[12]</sup>

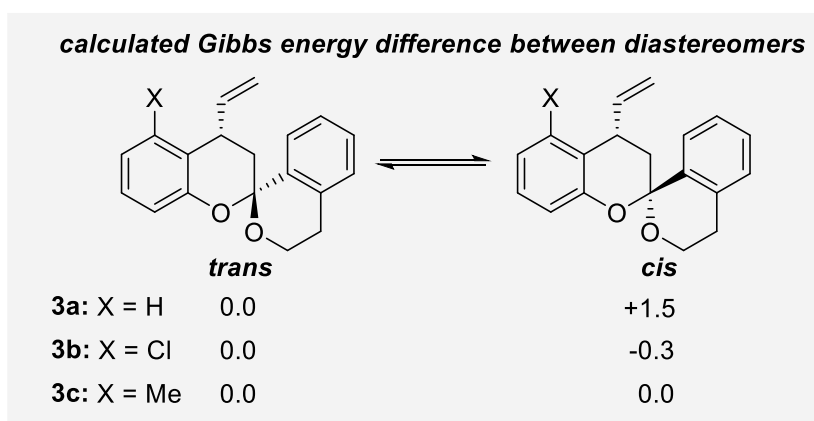

**Fig S4.** Calculated Gibbs free energy of diastereomers.

### The calculated Cartesian coordinates of optimized structures

|                          |          |          |          |         |         |          |          |
|--------------------------|----------|----------|----------|---------|---------|----------|----------|
|                          |          |          | C        | 3.53901 | 0.0299  | -2.14515 |          |
| <i>trans</i> - <b>3a</b> |          |          | C        | 2.2301  | 0.07184 | -1.67583 |          |
| C                        | -3.39365 | -2.58487 | -0.40294 | C       | 1.96258 | 0.06565  | -0.30279 |
| C                        | -2.01331 | -2.41422 | -0.41013 | C       | 3.02156 | -0.02716 | 0.6116   |
| C                        | -1.46687 | -1.14097 | -0.23088 | C       | 4.33458 | -0.06934 | 0.12924  |
| C                        | -2.29077 | -0.02108 | -0.04598 | C       | 4.59776 | -0.03201 | -1.23665 |
| C                        | -3.67573 | -0.22054 | -0.03636 | H       | 3.73321 | 0.03924  | -3.21305 |
| C                        | -4.2326  | -1.48496 | -0.21077 | H       | 1.4052  | 0.09672  | -2.37999 |
| H                        | -3.81261 | -3.57656 | -0.54407 | C       | 2.72895 | -0.1214  | 2.09122  |
| H                        | -1.33624 | -3.24958 | -0.55315 | H       | 5.15449 | -0.14544 | 0.83867  |
| C                        | -1.68365 | 1.35849  | 0.1532   | H       | 5.62266 | -0.0672  | -1.59325 |
| H                        | -4.31824 | 0.64339  | 0.10464  | C       | 1.30622 | -0.61945 | 2.29549  |
| H                        | -5.31046 | -1.61105 | -0.20052 | H       | 3.44773 | -0.79022 | 2.57789  |
| C                        | -0.23554 | 1.35612  | -0.36376 | H       | 2.83159 | 0.86373  | 2.56468  |
| O                        | -0.0932  | -1.07069 | -0.27602 | H       | 1.1937  | -1.65136 | 1.9404   |
| H                        | -1.65121 | 1.57003  | 1.22856  | H       | 0.99778 | -0.5718  | 3.3419   |
| H                        | -0.22765 | 1.31257  | -1.45685 | C       | 0.52202 | 0.14536  | 0.1814   |
| H                        | 0.28289  | 2.26798  | -0.06028 | O       | 0.41577 | 0.24059  | 1.5831   |

|   |          |         |          |
|---|----------|---------|----------|
| C | -2.48227 | 2.43866 | -0.52522 |
| H | -2.60637 | 2.32484 | -1.60251 |
| C | -3.01791 | 3.48863 | 0.09514  |
| H | -3.5731  | 4.2501  | -0.44382 |
| H | -2.91685 | 3.62343 | 1.16917  |

M06-2X/def2TZVP-SMD(CH<sub>2</sub>Cl<sub>2</sub>): E = -  
885.281768 hartree  
Corrected Gibbs Free Energy = -884.998858  
hartree

*cis-3a*

|   |          |          |          |
|---|----------|----------|----------|
| C | 3.46592  | -2.46978 | 0.58604  |
| C | 2.08236  | -2.33497 | 0.55756  |
| C | 1.50631  | -1.16338 | 0.05828  |
| C | 2.30275  | -0.11764 | -0.42324 |
| C | 3.69264  | -0.2703  | -0.36869 |
| C | 4.27988  | -1.4309  | 0.12573  |
| H | 3.90868  | -3.38225 | 0.97361  |
| H | 1.42527  | -3.11994 | 0.91644  |
| C | 1.68612  | 1.15158  | -0.98895 |
| H | 4.31363  | 0.54867  | -0.72156 |
| H | 5.36055  | -1.5263  | 0.15348  |
| C | 0.1692   | 0.96001  | -1.20149 |
| O | 0.13005  | -1.12769 | 0.04666  |
| H | 2.12795  | 1.32648  | -1.9781  |
| H | -0.33438 | 1.92472  | -1.2937  |
| H | 0.00601  | 0.40837  | -2.13052 |
| C | -3.6963  | -1.01603 | -1.75045 |
| C | -2.35248 | -0.76842 | -1.48904 |
| C | -1.9599  | -0.11975 | -0.31335 |
| C | -2.92715 | 0.2441   | 0.63471  |
| C | -4.27617 | -0.00922 | 0.36222  |
| C | -4.66466 | -0.62494 | -0.82361 |
| H | -3.98704 | -1.51666 | -2.66862 |
| H | -1.59765 | -1.09398 | -2.19687 |
| C | -2.49846 | 0.85795  | 1.94743  |
| H | -5.02405 | 0.27022  | 1.09973  |
| H | -5.71581 | -0.81512 | -1.01776 |
| C | -1.04727 | 0.49648  | 2.22306  |
| H | -2.59041 | 1.95113  | 1.90787  |
| H | -3.14662 | 0.50786  | 2.75865  |
| H | -0.64527 | 1.02685  | 3.0887   |
| H | -0.93095 | -0.58243 | 2.38364  |

|   |          |         |          |
|---|----------|---------|----------|
| C | -0.48427 | 0.16683 | -0.06878 |
| O | -0.25846 | 0.91076 | 1.10639  |
| C | 2.03003  | 2.34836 | -0.13341 |
| H | 1.68677  | 2.30303 | 0.89545  |
| C | 2.71662  | 3.40045 | -0.57692 |
| H | 2.95382  | 4.24109 | 0.068    |
| H | 3.06587  | 3.46121 | -1.60541 |

M06-2X/def2TZVP-SMD(CH<sub>2</sub>Cl<sub>2</sub>): E = -  
885.279528 hartree  
Corrected Gibbs Free Energy = -884.99648  
hartree

*trans-3b*

|   |          |          |          |
|---|----------|----------|----------|
| C | 2.73778  | 2.74875  | -0.94329 |
| C | 1.38374  | 2.44509  | -0.99175 |
| C | 0.94126  | 1.18109  | -0.5968  |
| C | 1.83191  | 0.17601  | -0.17367 |
| C | 3.18085  | 0.5529   | -0.08246 |
| C | 3.64793  | 1.80716  | -0.46744 |
| H | 3.08656  | 3.72914  | -1.25133 |
| H | 0.6451   | 3.16804  | -1.31881 |
| C | 1.32286  | -1.21297 | 0.18128  |
| H | 4.70309  | 2.03573  | -0.38173 |
| C | -0.16998 | -1.35276 | -0.18681 |
| O | -0.41773 | 0.99575  | -0.65307 |
| H | 1.42606  | -1.35142 | 1.26324  |
| H | -0.26899 | -1.54933 | -1.25765 |
| H | -0.60158 | -2.20293 | 0.34445  |
| C | -4.1365  | -0.59939 | -1.88819 |
| C | -2.79456 | -0.4982  | -1.53531 |
| C | -2.42308 | -0.15946 | -0.22993 |
| C | -3.41152 | 0.12241  | 0.7242   |
| C | -4.75813 | 0.01754  | 0.35887  |
| C | -5.12364 | -0.3488  | -0.93295 |
| H | -4.41177 | -0.86694 | -2.90344 |
| H | -2.02672 | -0.67145 | -2.28171 |
| C | -3.01036 | 0.57043  | 2.11069  |
| H | -5.52357 | 0.23957  | 1.09781  |
| H | -6.17347 | -0.42373 | -1.19934 |
| C | -1.59997 | 1.13831  | 2.07215  |
| H | -3.71839 | 1.31698  | 2.48752  |
| H | -3.0327  | -0.27745 | 2.80758  |
| H | -1.56088 | 2.06045  | 1.47896  |
| H | -1.20907 | 1.34505  | 3.07035  |

|    |          |          |          |
|----|----------|----------|----------|
| C  | -0.94963 | -0.08687 | 0.13849  |
| O  | -0.72931 | 0.15711  | 1.50491  |
| C  | 2.05552  | -2.32979 | -0.52941 |
| H  | 2.28228  | -2.14688 | -1.57927 |
| C  | 2.3391   | -3.50885 | 0.01777  |
| H  | 2.80515  | -4.3051  | -0.55351 |
| H  | 2.13004  | -3.71345 | 1.06486  |
| Cl | 4.36728  | -0.56381 | 0.5897   |

M06-2X/def2TZVP-SMD(CH<sub>2</sub>Cl<sub>2</sub>): E = -1344.882219 hartree  
 Corrected Gibbs Free Energy = -1344.611155 hartree

*cis-3b*

|   |          |          |          |
|---|----------|----------|----------|
| C | -2.81893 | 2.70705  | 0.95089  |
| C | -1.45561 | 2.44647  | 0.91225  |
| C | -0.99159 | 1.25259  | 0.35373  |
| C | -1.87268 | 0.29039  | -0.16971 |
| C | -3.23885 | 0.60479  | -0.12145 |
| C | -3.7266  | 1.78645  | 0.42839  |
| H | -3.18127 | 3.63358  | 1.38448  |
| H | -0.72726 | 3.14926  | 1.30051  |
| C | -1.34666 | -1.00845 | -0.7522  |
| H | -4.79273 | 1.97657  | 0.43873  |
| C | 0.15018  | -0.85176 | -1.08986 |
| O | 0.3739   | 1.12522  | 0.3131   |
| H | -1.87106 | -1.19608 | -1.69555 |
| H | 0.59975  | -1.82679 | -1.28741 |
| H | 0.24961  | -0.2453  | -1.99366 |
| C | 3.97192  | 1.11324  | -1.90032 |
| C | 2.66029  | 0.86729  | -1.50772 |
| C | 2.38605  | 0.11768  | -0.35862 |
| C | 3.44412  | -0.35216 | 0.43256  |
| C | 4.76004  | -0.0995  | 0.02894  |
| C | 5.02806  | 0.61798  | -1.13267 |
| H | 4.17031  | 1.69286  | -2.79629 |
| H | 1.83943  | 1.27242  | -2.08998 |
| C | 3.14884  | -1.07644 | 1.72514  |
| H | 5.57874  | -0.46113 | 0.64549  |
| H | 6.05517  | 0.80588  | -1.43005 |
| C | 1.7549   | -0.70151 | 2.20236  |
| H | 3.19204  | -2.16306 | 1.57596  |
| H | 3.89966  | -0.82293 | 2.4818   |
| H | 1.43661  | -1.29606 | 3.06102  |

|    |          |          |          |
|----|----------|----------|----------|
| H  | 1.69907  | 0.36158  | 2.46752  |
| C  | 0.93934  | -0.16698 | 0.02558  |
| O  | 0.82475  | -0.99416 | 1.1576   |
| C  | -1.62614 | -2.18564 | 0.15942  |
| H  | -1.27998 | -2.08113 | 1.18197  |
| C  | -2.23593 | -3.29891 | -0.24064 |
| H  | -2.40583 | -4.12948 | 0.43751  |
| H  | -2.59715 | -3.41766 | -1.25916 |
| Cl | -4.41404 | -0.51039 | -0.81558 |

M06-2X/def2TZVP-SMD(CH<sub>2</sub>Cl<sub>2</sub>): E = -1344.88325 hartree  
 Corrected Gibbs Free Energy = -1344.611577 hartree

*trans-3c*

|   |          |          |          |
|---|----------|----------|----------|
| C | -3.03421 | -2.6277  | -0.90508 |
| C | -1.67532 | -2.35607 | -0.97739 |
| C | -1.2025  | -1.10872 | -0.56541 |
| C | -2.06717 | -0.10217 | -0.10633 |
| C | -3.43893 | -0.41521 | 0.01994  |
| C | -3.90443 | -1.66856 | -0.38933 |
| H | -3.41237 | -3.59443 | -1.22335 |
| H | -0.95824 | -3.08802 | -1.33248 |
| C | -1.51174 | 1.26455  | 0.27491  |
| H | -4.96219 | -1.89421 | -0.29145 |
| C | -0.025   | 1.38795  | -0.12128 |
| O | 0.16488  | -0.95343 | -0.64289 |
| H | -1.58331 | 1.38093  | 1.36336  |
| H | 0.05528  | 1.60696  | -1.18959 |
| H | 0.43798  | 2.21538  | 0.42007  |
| C | 3.88621  | 0.59702  | -1.92847 |
| C | 2.5506   | 0.51429  | -1.54764 |
| C | 2.20052  | 0.1504   | -0.24313 |
| C | 3.20397  | -0.17713 | 0.68028  |
| C | 4.54416  | -0.09092 | 0.28711  |
| C | 4.8889   | 0.30144  | -1.00277 |
| H | 4.1444   | 0.88459  | -2.94281 |
| H | 1.76993  | 0.72126  | -2.27181 |
| C | 2.82512  | -0.65413 | 2.06351  |
| H | 5.32086  | -0.34856 | 1.00246  |
| H | 5.93397  | 0.36132  | -1.29099 |
| C | 1.39978  | -1.1854  | 2.0446   |
| H | 3.52341  | -1.42795 | 2.40182  |
| H | 2.88593  | 0.17318  | 2.78261  |

|   |          |          |          |
|---|----------|----------|----------|
| H | 1.323    | -2.09003 | 1.42859  |
| H | 1.02878  | -1.40997 | 3.04676  |
| C | 0.733    | 0.09688  | 0.15509  |
| O | 0.54248  | -0.16817 | 1.52512  |
| C | -2.23448 | 2.41508  | -0.38648 |
| H | -2.40667 | 2.29949  | -1.45683 |
| C | -2.58664 | 3.54518  | 0.22312  |
| H | -3.04938 | 4.36583  | -0.31594 |
| H | -2.42921 | 3.68652  | 1.28974  |
| C | -4.42379 | 0.5602   | 0.62064  |
| H | -4.03798 | 1.00768  | 1.5419   |
| H | -4.65047 | 1.39055  | -0.05376 |
| H | -5.36085 | 0.05038  | 0.85857  |

M06-2X/def2TZVP-SMD(CH<sub>2</sub>Cl<sub>2</sub>): E = -  
924.589307 hartree  
Corrected Gibbs Free Energy = -924.280306  
hartree

*cis-3c*

|   |          |          |          |
|---|----------|----------|----------|
| C | 3.13455  | -2.59183 | 0.85553  |
| C | 1.7642   | -2.37345 | 0.84271  |
| C | 1.26063  | -1.19932 | 0.27707  |
| C | 2.10827  | -0.22912 | -0.27653 |
| C | 3.49992  | -0.46805 | -0.26537 |
| C | 3.99601  | -1.6445  | 0.30197  |
| H | 3.53318  | -3.50204 | 1.29315  |
| H | 1.06265  | -3.08974 | 1.25595  |
| C | 1.52694  | 1.04308  | -0.87154 |
| H | 5.0678   | -1.81887 | 0.30452  |
| C | 0.02339  | 0.85191  | -1.16    |
| O | -0.11395 | -1.10776 | 0.27035  |
| H | 2.00922  | 1.22741  | -1.83956 |
| H | -0.45562 | 1.81262  | -1.35997 |
| H | -0.08983 | 0.227    | -2.04951 |
| C | -3.79581 | -1.17885 | -1.80259 |
| C | -2.47402 | -0.9074  | -1.46441 |
| C | -2.16675 | -0.14429 | -0.33274 |
| C | -3.20061 | 0.31249  | 0.49726  |
| C | -4.52706 | 0.03396  | 0.14863  |
| C | -4.829   | -0.6964  | -0.99653 |
| H | -4.01967 | -1.76878 | -2.68582 |
| H | -1.66978 | -1.3032  | -2.07553 |
| C | -2.8675  | 1.051    | 1.77268  |
| H | -5.32661 | 0.38548  | 0.79553  |

|   |          |          |          |
|---|----------|----------|----------|
| H | -5.86379 | -0.9044  | -1.25098 |
| C | -1.44635 | 0.71058  | 2.19308  |
| H | -2.94149 | 2.13547  | 1.61945  |
| H | -3.58057 | 0.78571  | 2.56129  |
| H | -1.10648 | 1.31853  | 3.03414  |
| H | -1.3557  | -0.34889 | 2.46303  |
| C | -0.71001 | 0.16555  | -0.00839 |
| O | -0.56904 | 1.01497  | 1.10797  |
| C | 1.80359  | 2.25106  | -0.00061 |
| H | 1.51844  | 2.15194  | 1.04137  |
| C | 2.34115  | 3.38421  | -0.45043 |
| H | 2.50861  | 4.2353   | 0.20256  |
| H | 2.63159  | 3.50399  | -1.49198 |
| C | 4.46034  | 0.52118  | -0.87822 |
| H | 4.23241  | 0.70089  | -1.93577 |
| H | 4.4124   | 1.49325  | -0.37948 |
| H | 5.48604  | 0.14987  | -0.81837 |

M06-2X/def2TZVP-SMD(CH<sub>2</sub>Cl<sub>2</sub>): E = --  
924.589572 hartree  
Corrected Gibbs Free Energy = -924.280303  
hartree



## 10. References

- [1] Defieber, C.; Ariger, M.; Moriel, A. P.; Carreira, E. M. *Angew. Chem. Int. Ed.* **2007**, *46*, 3139–3143.
- [2] Yang, T.; Sun, Y.; Wang, H.; Lin, Z.; Wen, J.; Zhang, X. *Angew. Chem. Int. Ed.* **2020**, *59*, 6108–6114.
- [3] Yang, W.-L.; Wang, Y.-L.; Li, W.; Gu, B.-M.; Wang, S.-W.; Luo, X.; Tian, B.-X.; Deng, W.-P. *ACS Catal.* **2021**, *11*, 12557–12564.
- [4] Li, C.-Z.; Xiang, X.; Zhang, X.-H.; He, Z.-L.; Gu, S.-X.; Dong, X.-Q. *Org. Lett.* **2023**, *25*, 1172–1177.
- [5] Mei, G.-J.; Bian, C.-Y.; Li, G.-H.; Xu, S.-L.; Zheng, W.-Q.; Shi, F. *Org. Lett.* **2017**, *19*, 3219–3222.
- [6] Ma, Z.-C.; Wei, L.-W.; Huang, Y. *Org. Lett.* **2023**, *25*, 1661–1666.
- [7] Frisch, M. J.; Trucks, G. W.; Schlegel, H. B.; Scuseria, G. E.; Robb, M. A.; Cheeseman, J. R.; Scalmani, G.; Barone, V.; Petersson, G. A.; Nakatsuji, H.; Li, X.; Caricato, M.; Marenich, A. V.; Bloino, J.; Janesko, B. G.; Gomperts, R.; Mennucci, B.; Hratchian, H. P.; Ortiz, J. V.; Izmaylov, A. F.; Sonnenberg, J. L.; Williams-Young, D.; Ding, F.; Lipparini, F. Egidi, F.; Goings, J.; Peng, B.; Petrone, A.; Henderson, T.; Ranasinghe, D.; Zakrzewski, V. G.; Gao, J.; Rega, N.; Zheng, G.; Liang, W.; Hada, M.; Ehara, M.; Toyota, K.; Fukuda, R.; Hasegawa, J.; Ishida, M.; Nakajima, T.; Honda, Y.; Kitao, O.; Nakai, H.; Vreven, T.; Throssell, K.; Montgomery, Jr., J. A.; Peralta, J. E.; Ogliaro, F.; Bearpark, M. J.; Heyd, J. J.; Brothers, E. N.; Kudin, K. N.; Staroverov, V. N.; Keith, T. A.; Kobayashi, R.; Normand, J.; Raghavachari, K.; Rendell, A. P.; Burant, J. C.; Iyengar, S. S.; Tomasi, J.; Cossi, M.; Millam, J. M.; Klene, M.; Adamo, C.; Cammi, R.; Ochterski, J. W.; Martin, R. L.; Morokuma, K.; Farkas, O.; Foresman, J. B.; and Fox, D. J. Gaussian 16, Revision C.01, Gaussian, Inc., Wallingford CT, 2019.
- [8] (a) Lee, C.; Yang, W.; Parr, R. G. *Phys. Rev. B: Condens. Matter Mater. Phys.* **1988**, *37*, 785. (b) Becke, A. D. *J. Chem. Phys.* **1993**, *98*, 5648; (c) Grimme, S.; Antony, J.; Ehrlich, S.; Krieg, H. *J. Chem. Phys.* **2010**, *132*, 154104.
- [9] Zhao, Y.; Truhlar, D. G. *Acc. Chem. Res.* **2008**, *41*, 157–167.
- [10] Marenich, A. V.; Cramer, C. J.; Truhlar, D. G. *J. Phys. Chem. B* **2009**, *113*, 6378.
- [11] Grimme, S. *Chem. Eur. J.* **2012**, *18*, 9955.
- [12] Luchini, G.; Alegre-Requena J. V.; Guan, Y.; Funes-Ardoiz, I.; Paton, R. S. **2019**, *GoodVibes: GoodVibes 3.0.1*, <http://doi.org/10.5281/zenodo.595246>.

## 11. $^1\text{H}$ NMR, $^{13}\text{C}$ NMR and $^{19}\text{F}$ NMR spectra

$^1\text{H}$  NMR spectrum of product **3a** (400 MHz,  $\text{CDCl}_3$ , 12:1 dr)

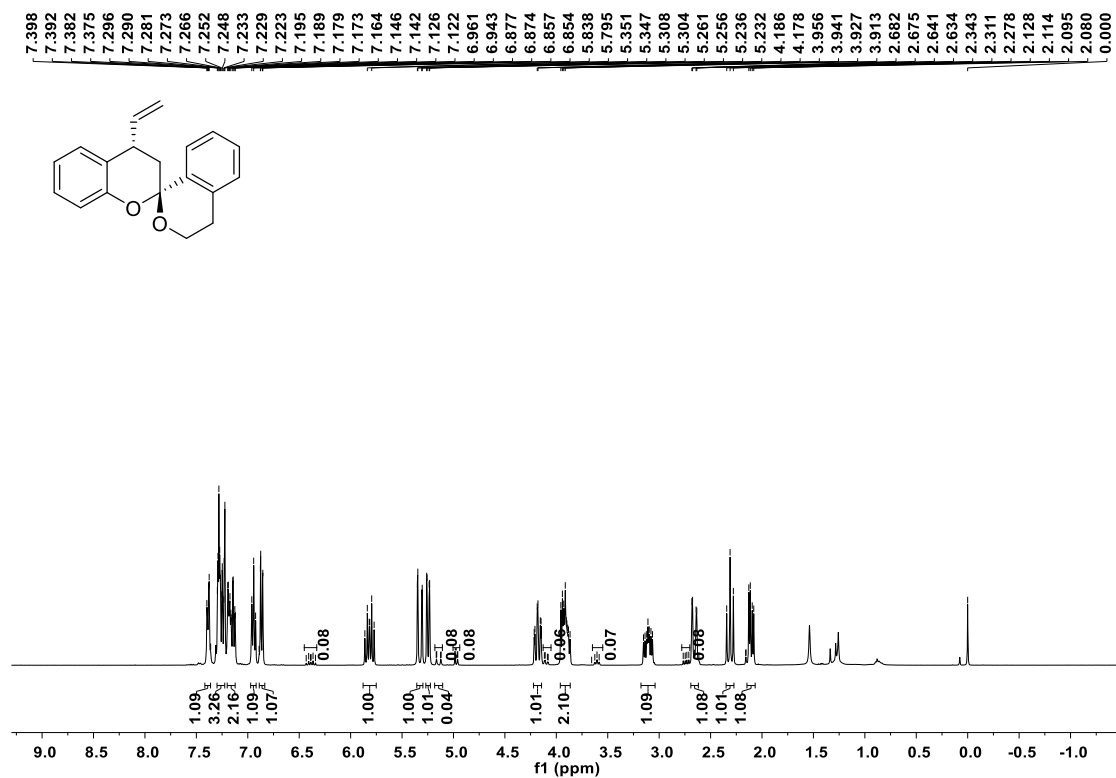

$^{13}\text{C}$  NMR spectrum of product **3a** (100 MHz,  $\text{CDCl}_3$ , 12:1 dr)

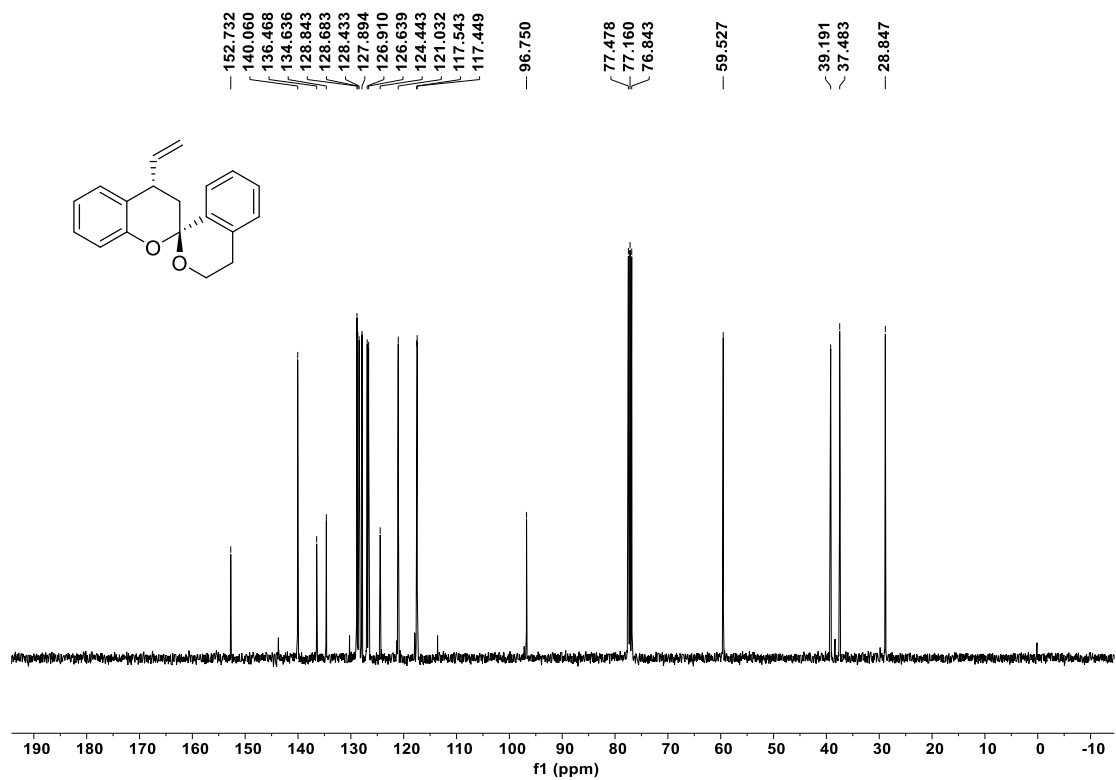

$^1\text{H}$  NMR spectrum of product **3b** (400 MHz,  $\text{CDCl}_3$ , 2:1 dr)

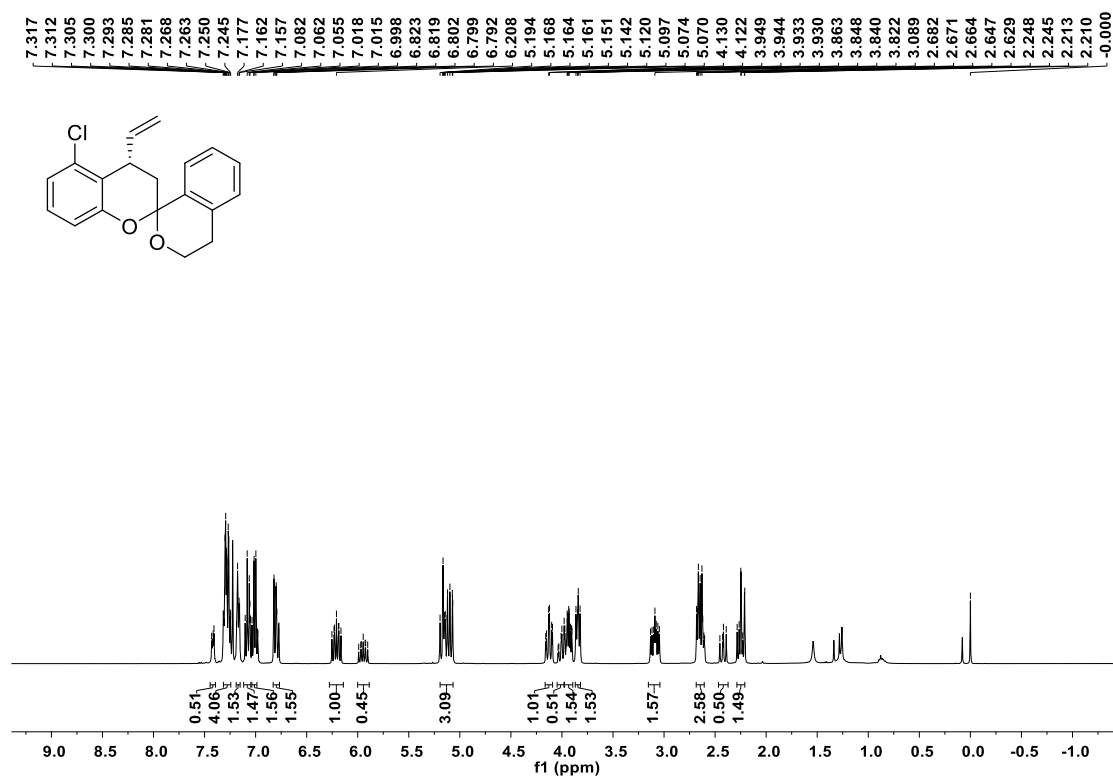

$^{13}\text{C}$  NMR spectrum of product **3b** (100 MHz,  $\text{CDCl}_3$ , 2:1 dr)

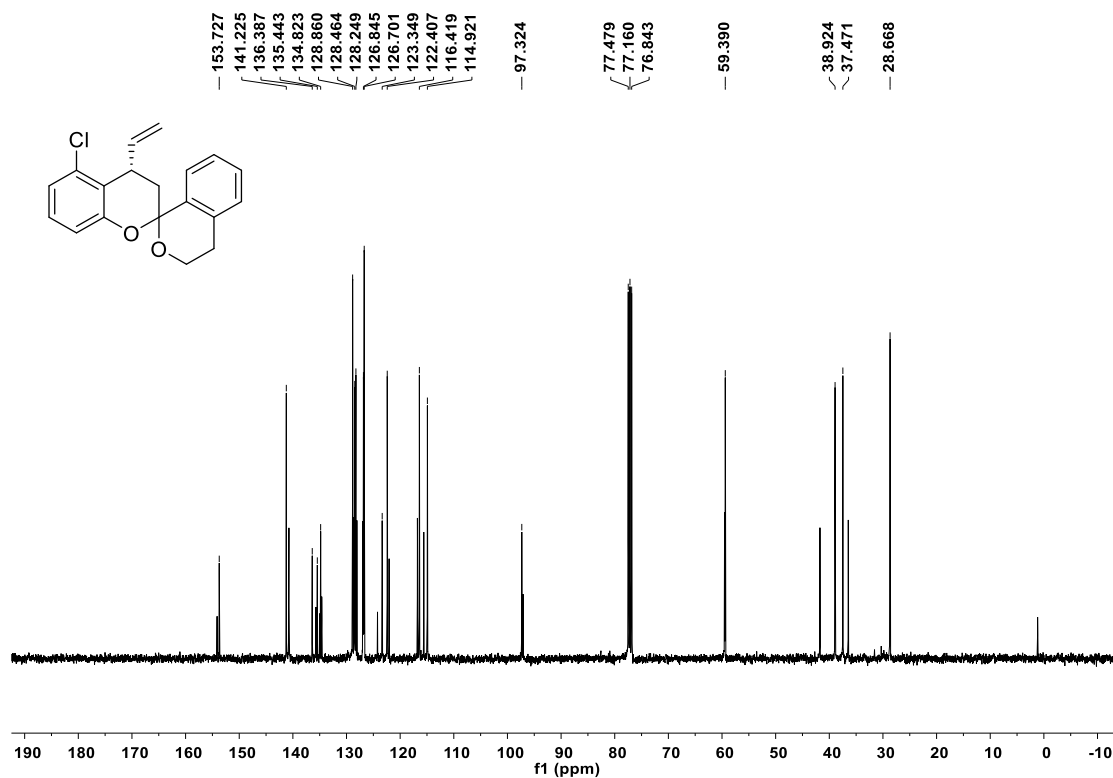

<sup>1</sup>H NMR spectrum of product **3c** (400 MHz, CDCl<sub>3</sub>, 1.6:1 dr)

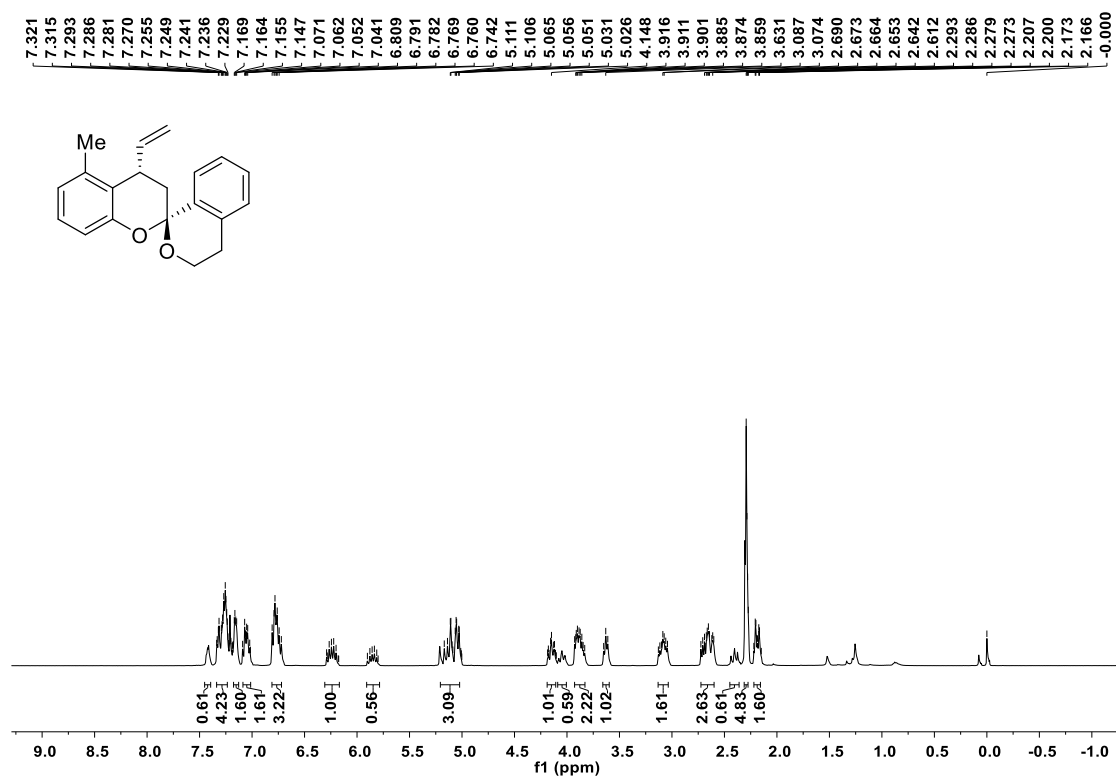

<sup>13</sup>C NMR spectrum of product **3c** (100 MHz, CDCl<sub>3</sub>, 1.6:1 dr)

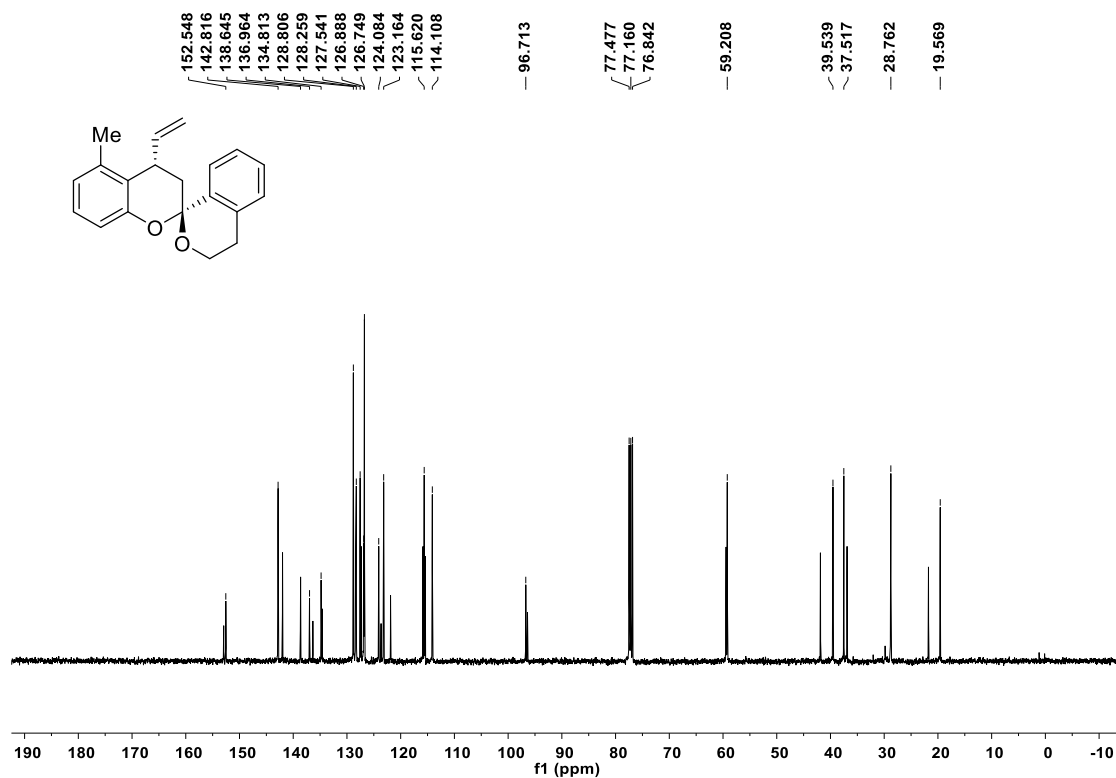

<sup>1</sup>H NMR spectrum of product **3d** (400 MHz, CDCl<sub>3</sub>, 14:1 dr)

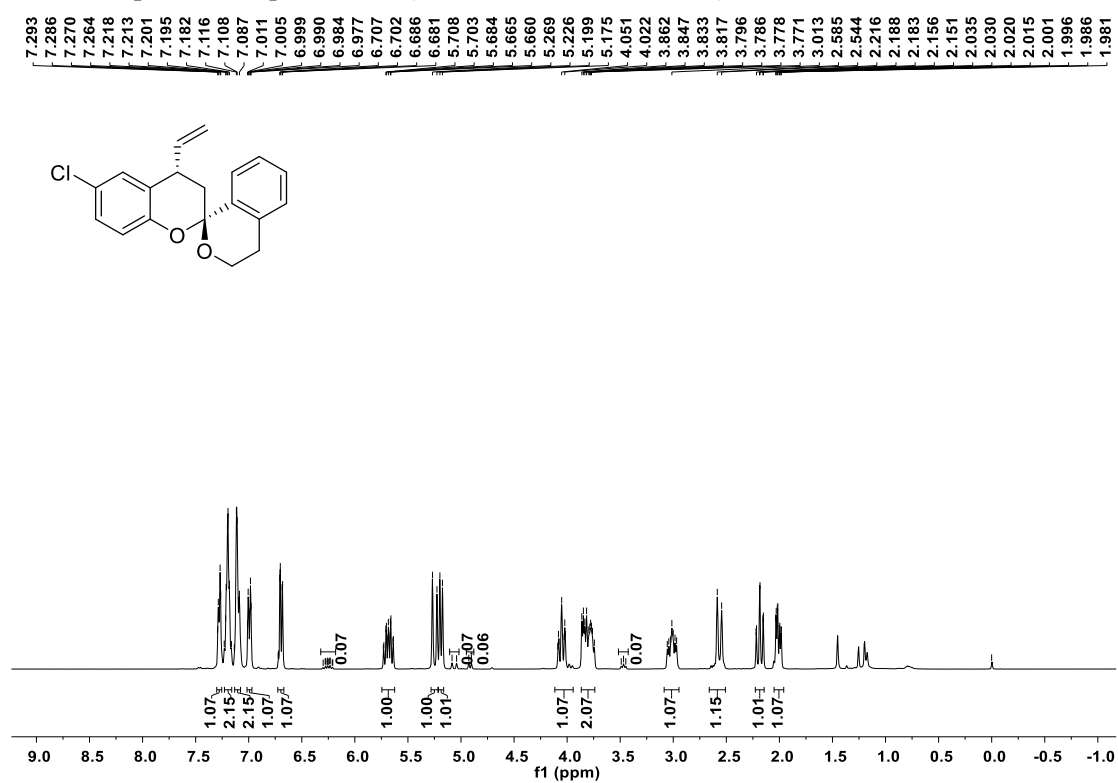

<sup>13</sup>C NMR spectrum of product **3d** (100 MHz, CDCl<sub>3</sub>, 14:1 dr)

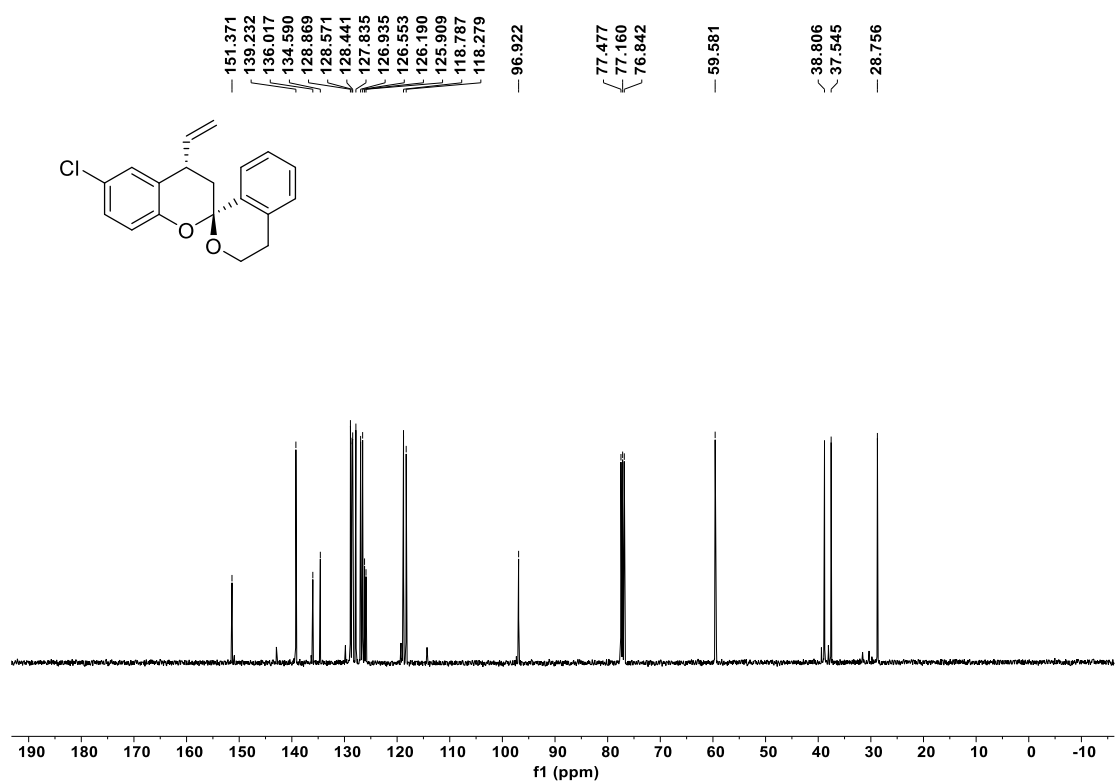

<sup>1</sup>H NMR spectrum of product **3e** (400 MHz, CDCl<sub>3</sub>, 14:1 dr)

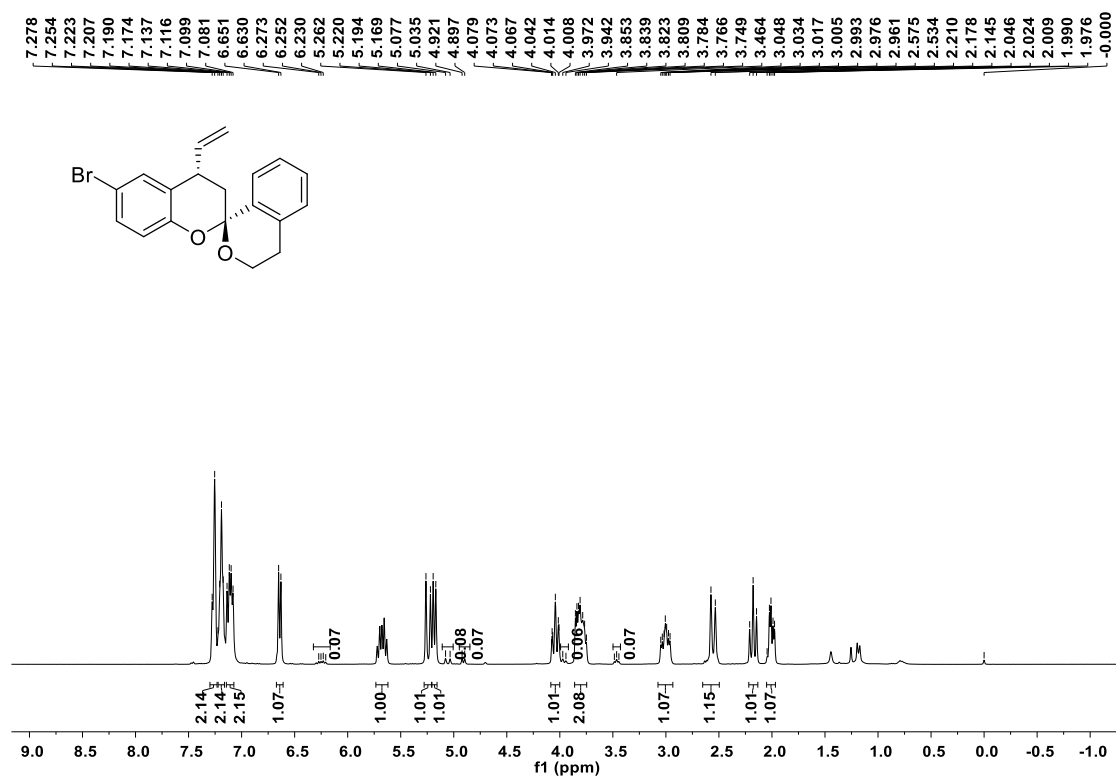

<sup>13</sup>C NMR spectrum of product **3e** (100 MHz, CDCl<sub>3</sub>, 14:1 dr)

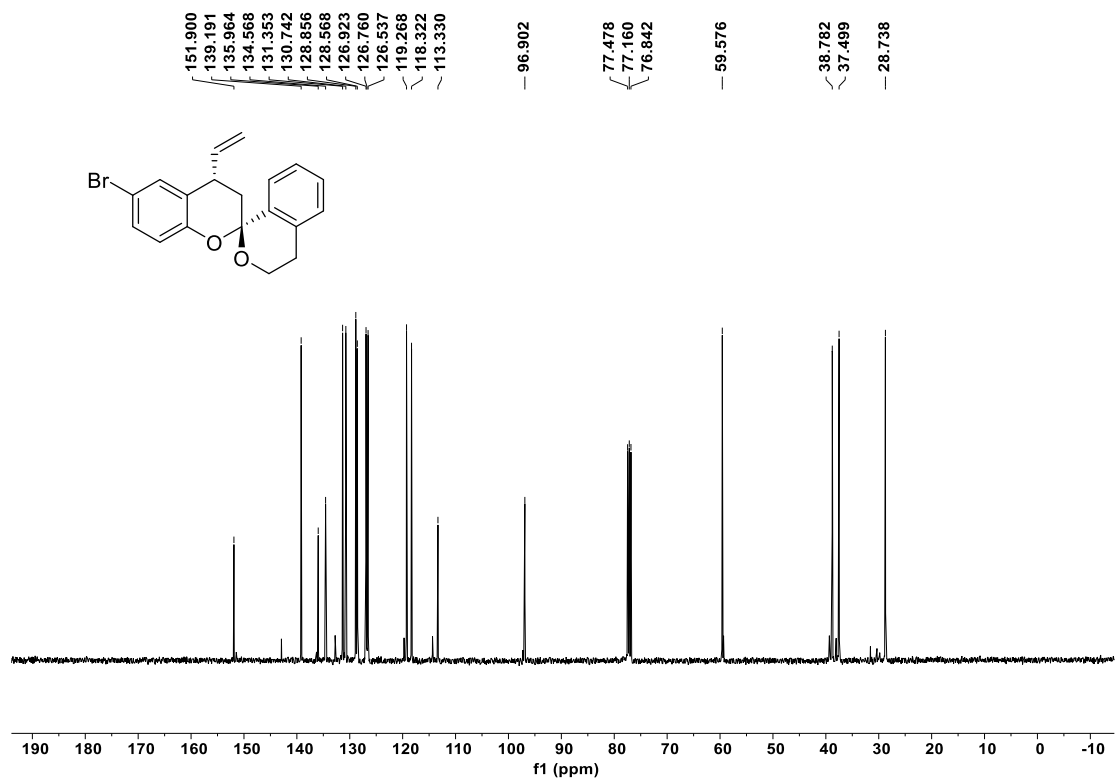

$^1\text{H}$  NMR spectrum of product **3f** (400 MHz,  $\text{CDCl}_3$ , 14:1 dr)

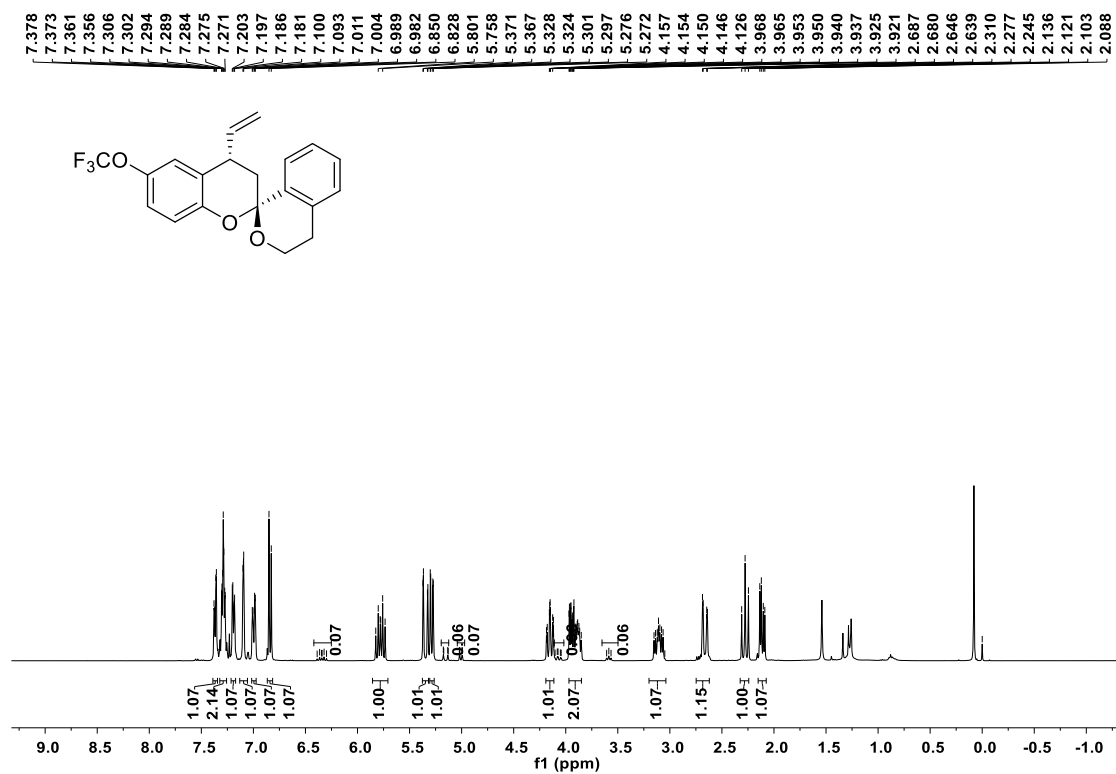

$^{13}\text{C}$  NMR spectrum of product **3f** (100 MHz,  $\text{CDCl}_3$ , 14:1 dr)

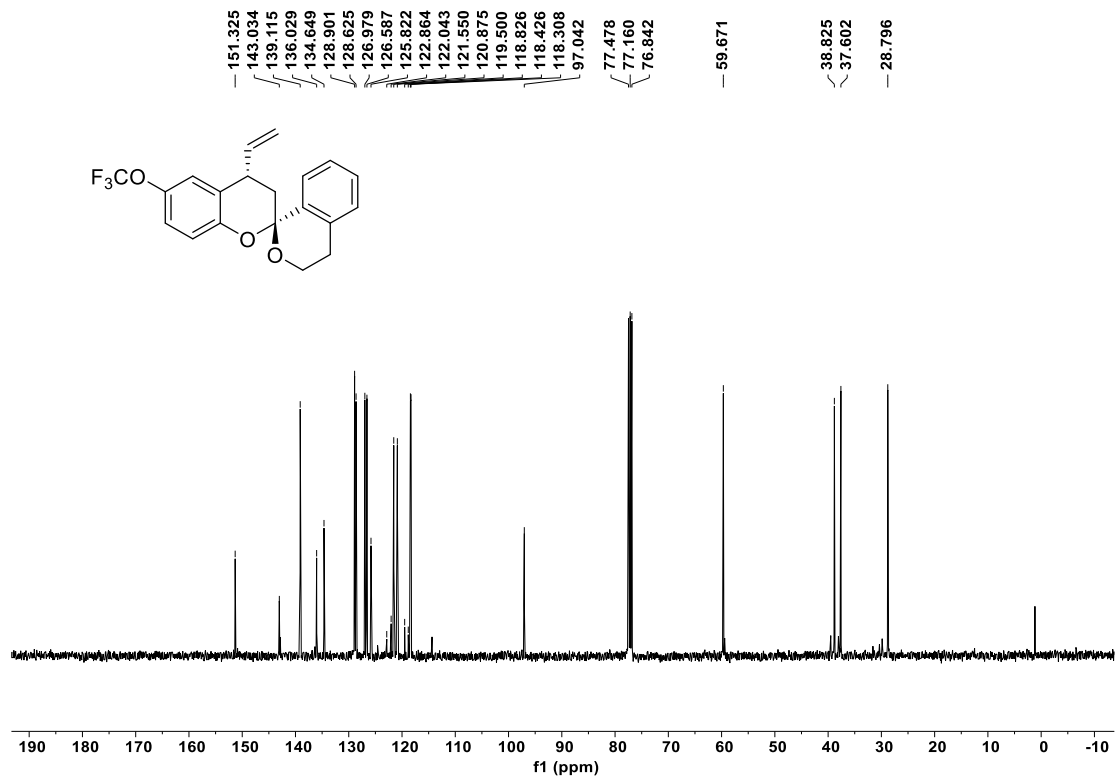

$^{19}\text{F}$  NMR spectrum of product **3f** (376 MHz,  $\text{CDCl}_3$ , 14:1 dr)

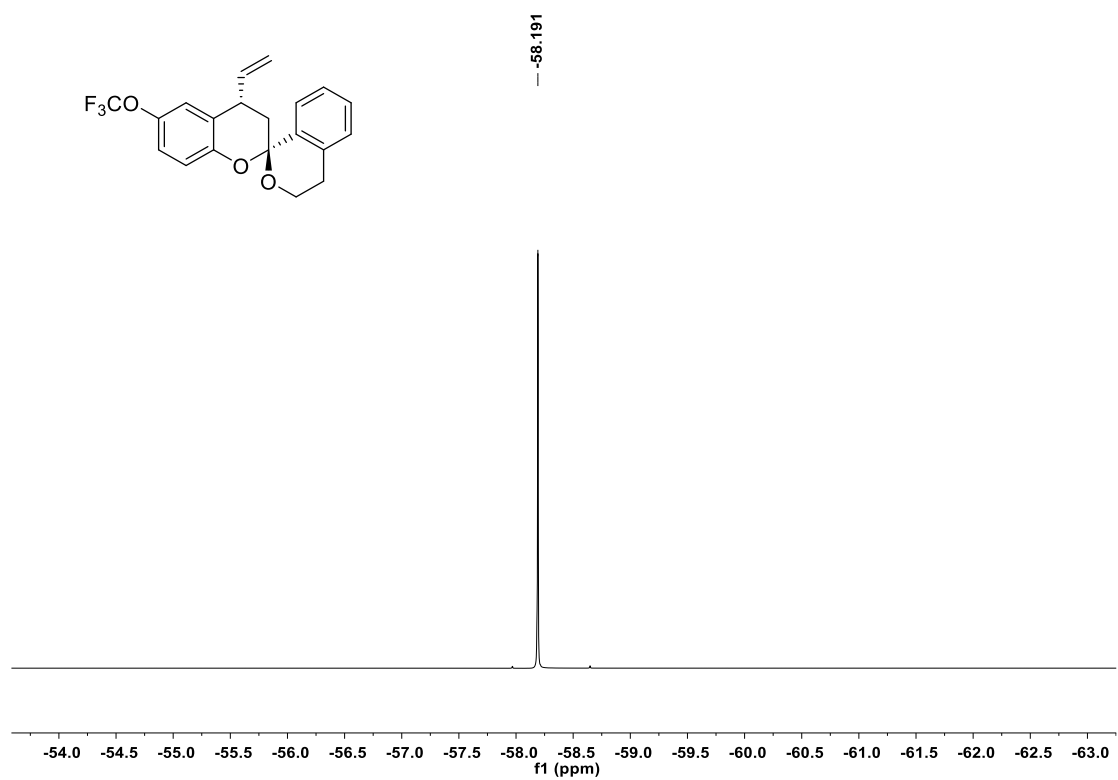



$^1\text{H}$  NMR spectrum of product **3g** (400 MHz,  $\text{CDCl}_3$ , 13:1 dr)

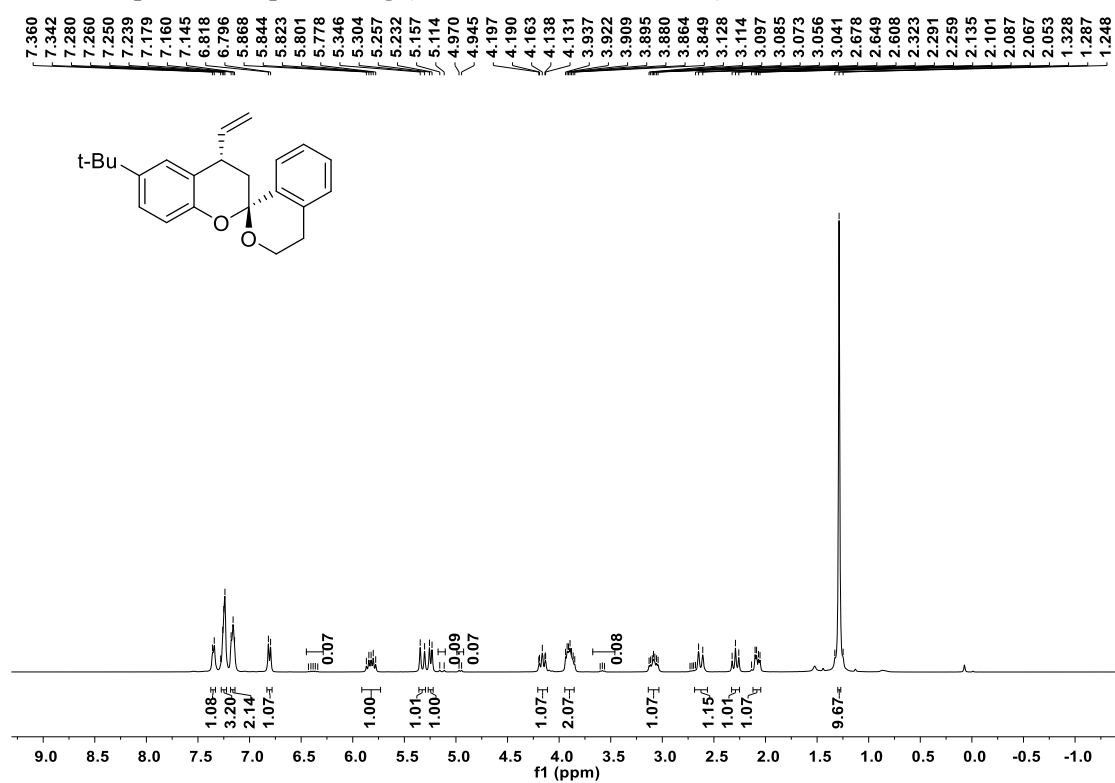

$^{13}\text{C}$  NMR spectrum of product **3g** (100 MHz,  $\text{CDCl}_3$ , 13:1 dr)

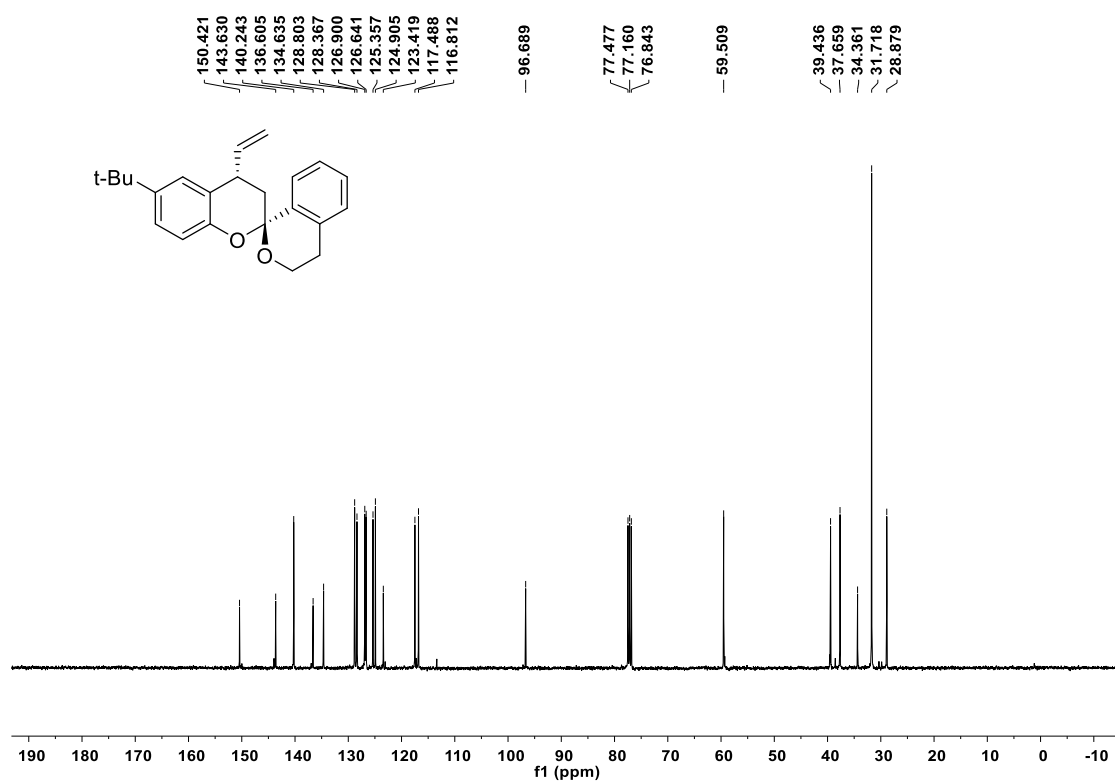

$^1\text{H}$  NMR spectrum of product **3h** (400 MHz,  $\text{CDCl}_3$ , 14:1 dr)

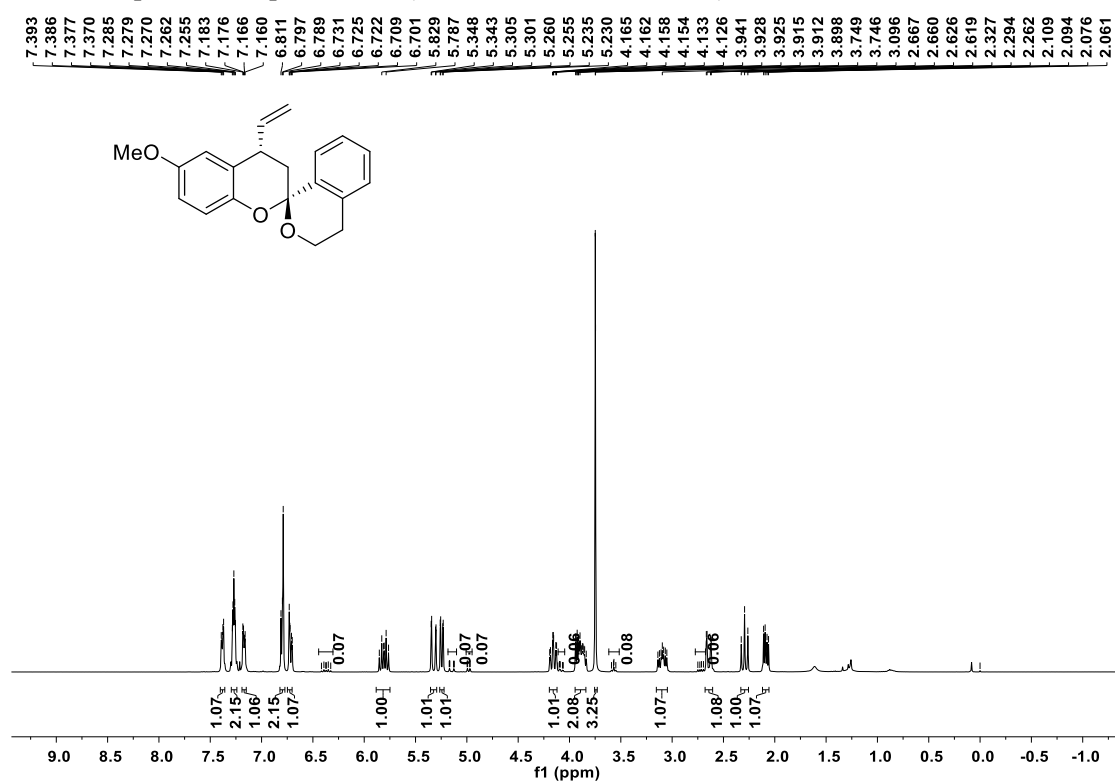

$^{13}\text{C}$  NMR spectrum of product **3h** (100 MHz,  $\text{CDCl}_3$ , 14:1 dr)

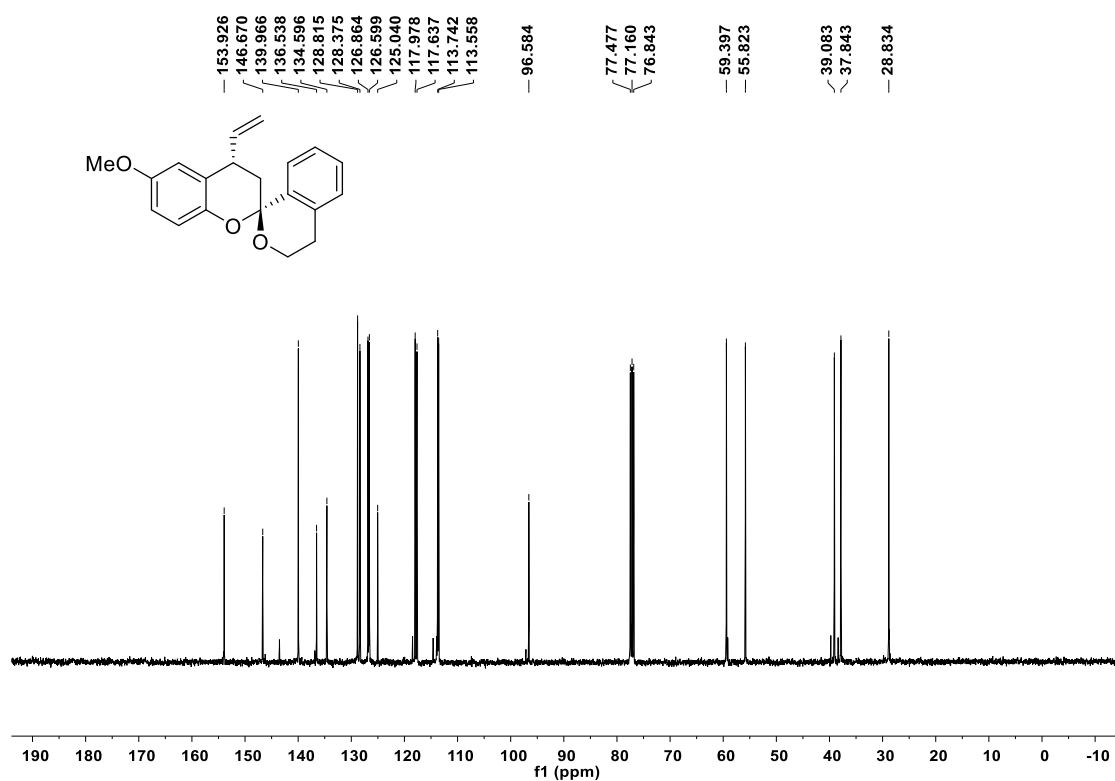

<sup>1</sup>H NMR spectrum of product **3i** (400 MHz, CDCl<sub>3</sub>, 14:1 dr)

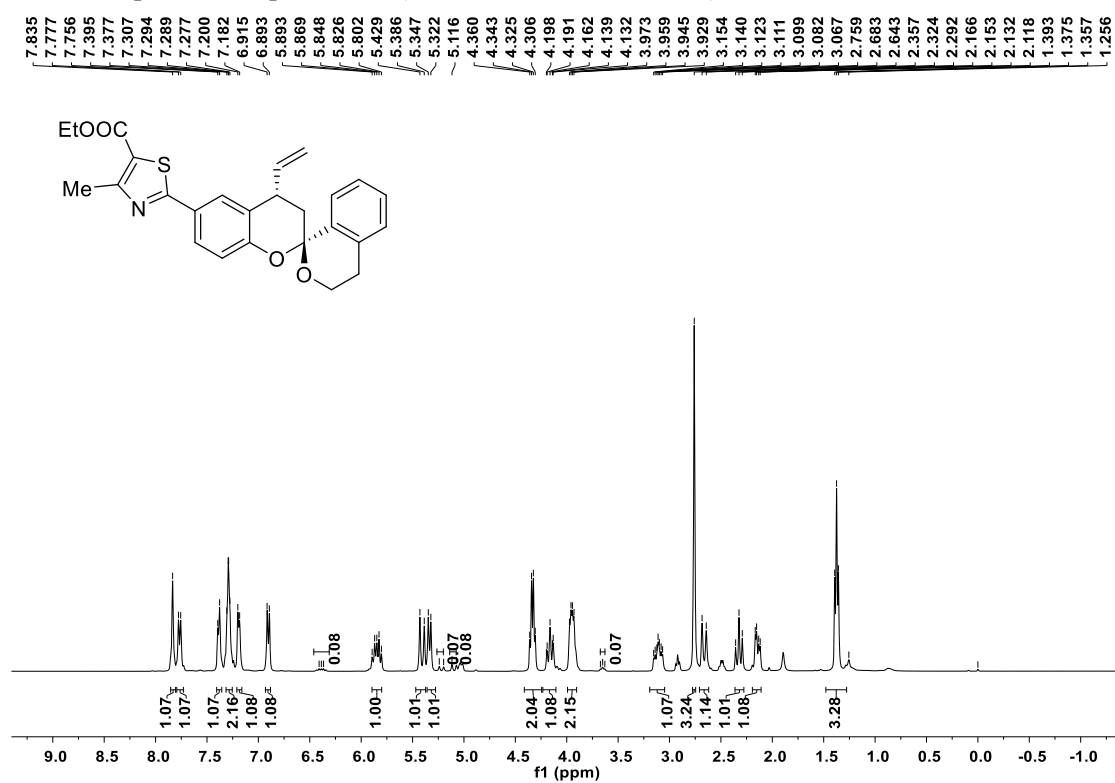

<sup>13</sup>C NMR spectrum of product **3i** (100 MHz, CDCl<sub>3</sub>, 14:1 dr)

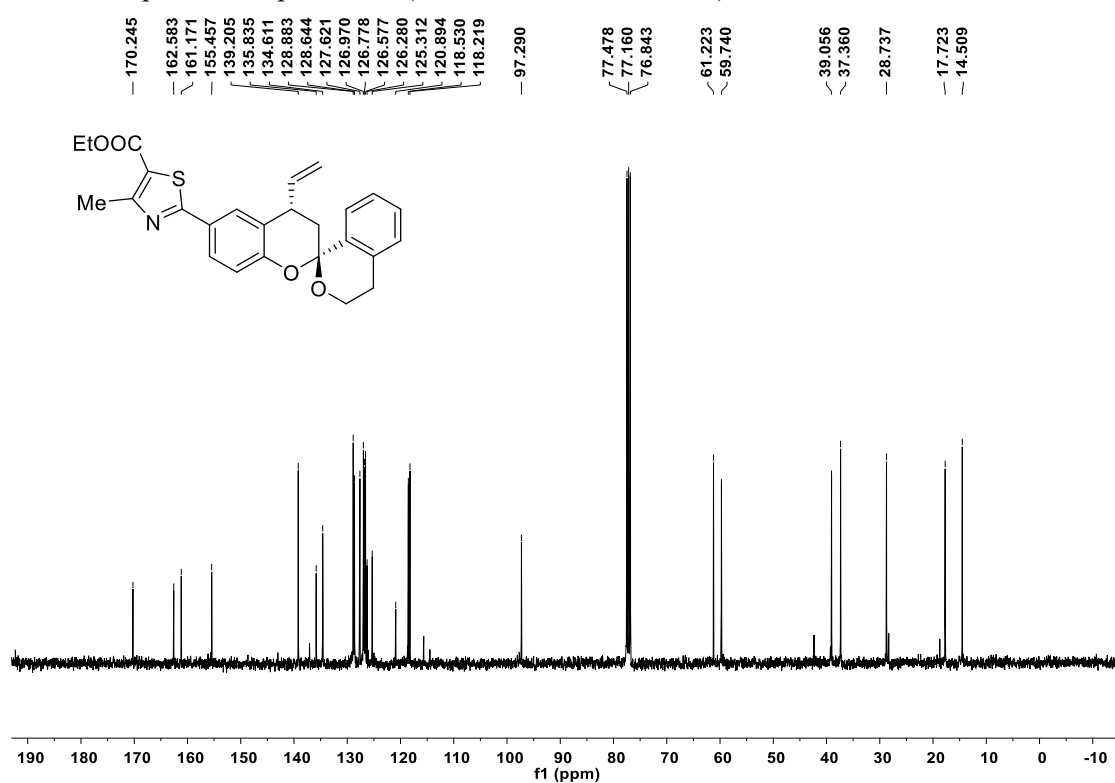

$^1\text{H}$  NMR spectrum of product **3j** (400 MHz,  $\text{CDCl}_3$ , 12:1 dr)

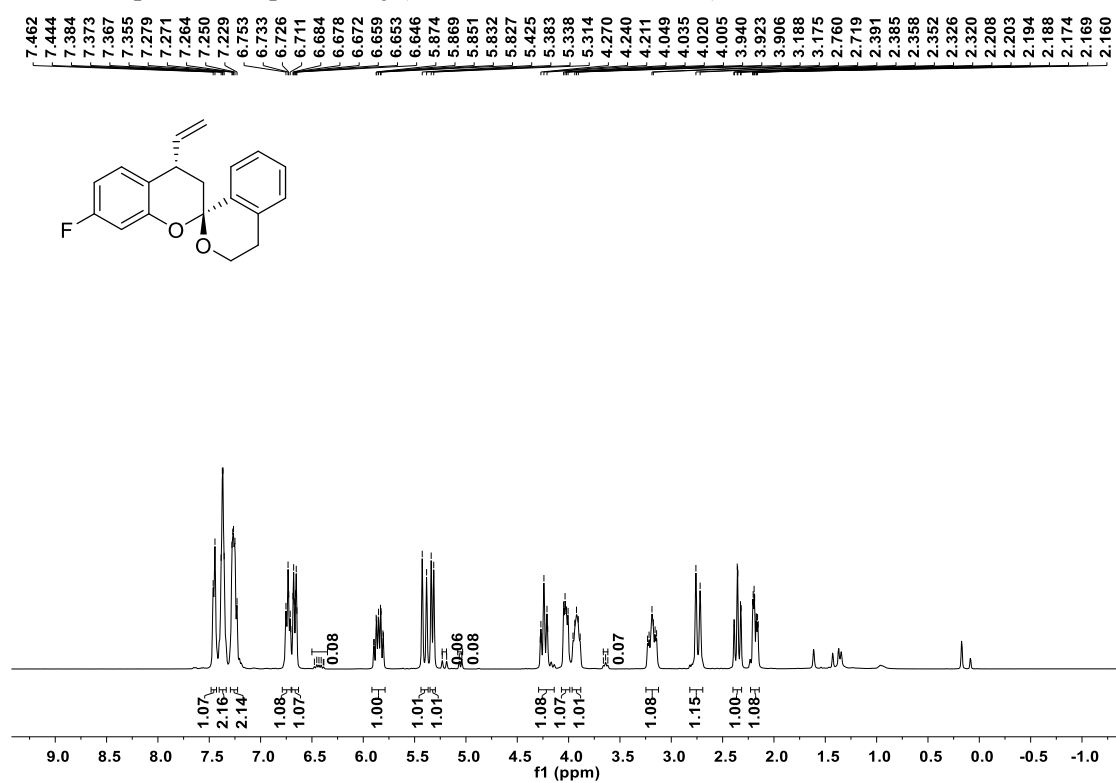

$^{13}\text{C}$  NMR spectrum of product **3j** (100 MHz,  $\text{CDCl}_3$ , 12:1 dr)

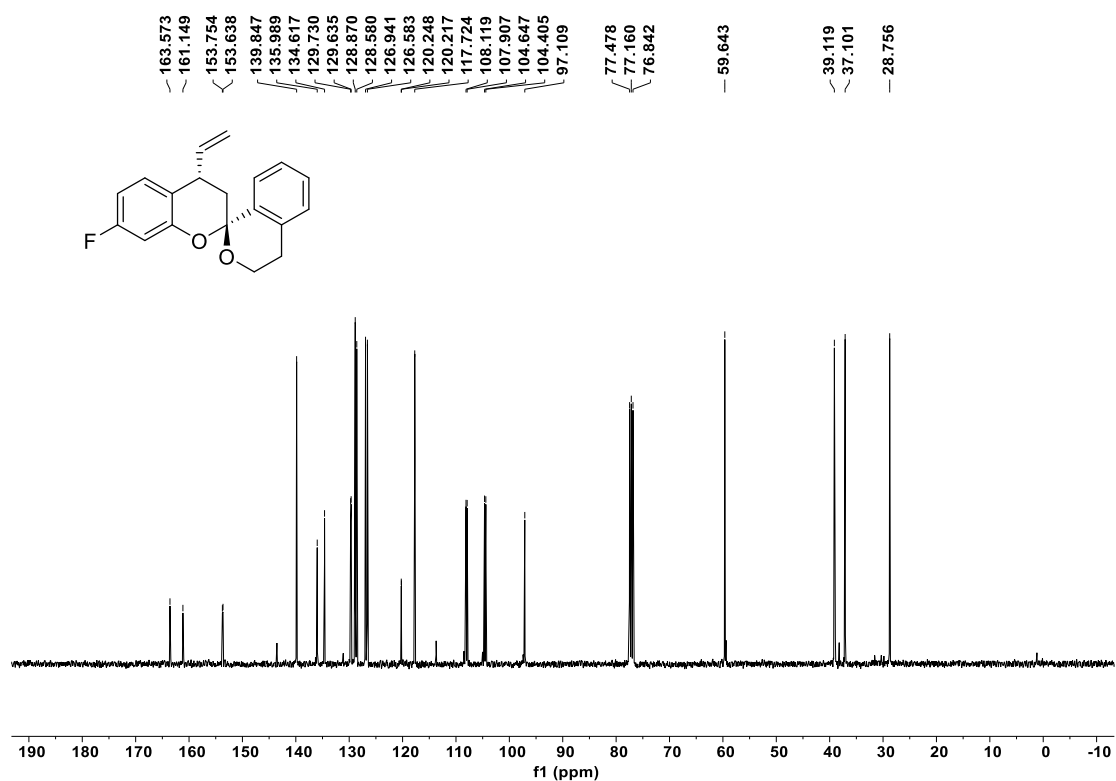

$^{19}\text{F}$  NMR spectrum of product **3j** (376 MHz,  $\text{CDCl}_3$ , 12:1 dr)

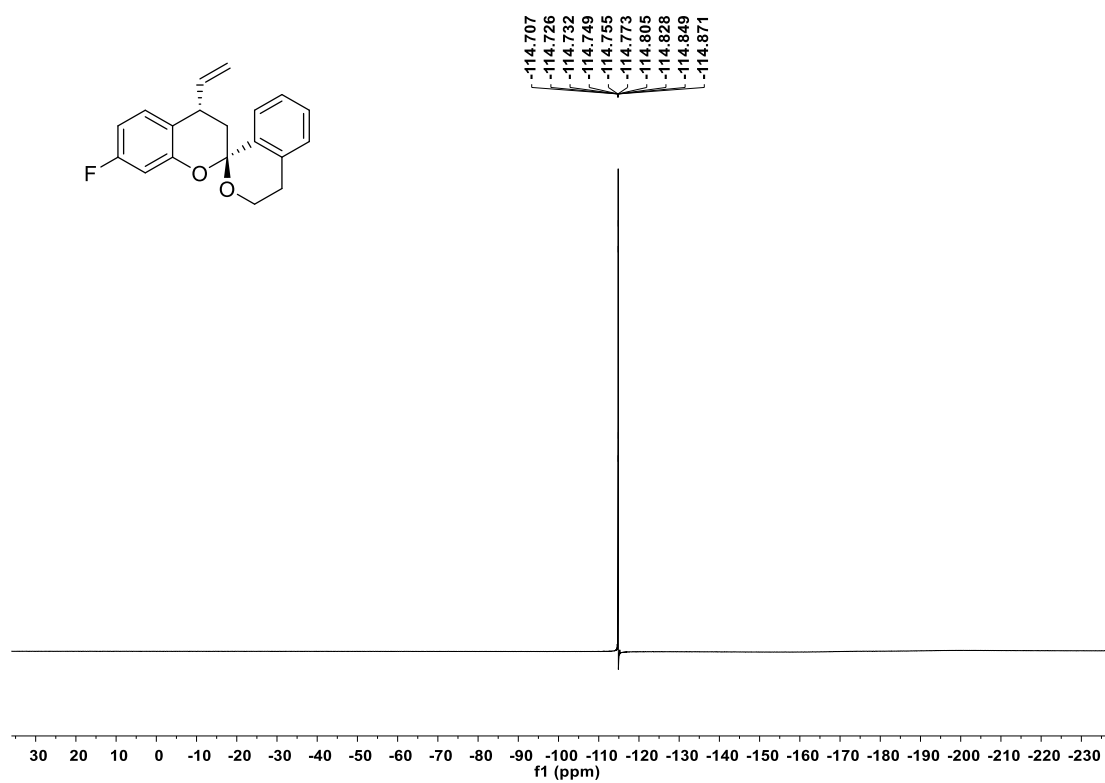

$^1\text{H}$  NMR spectrum of product **3k** (400 MHz,  $\text{CDCl}_3$ , 14:1 dr)

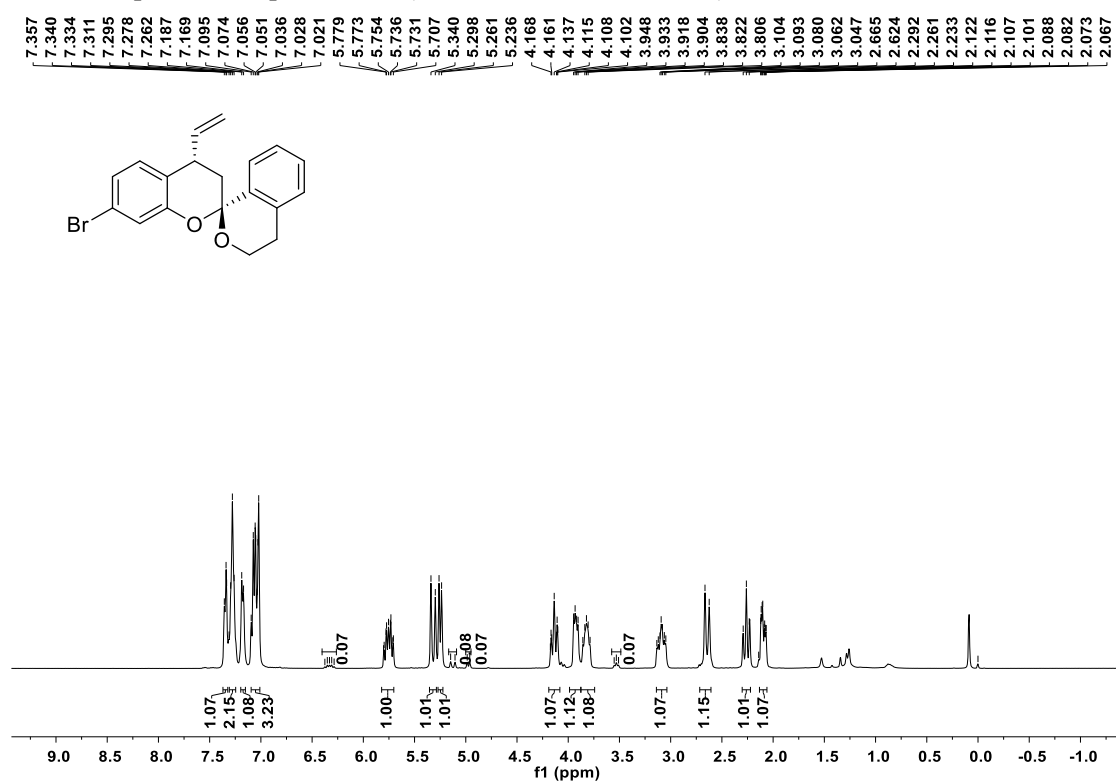

$^{13}\text{C}$  NMR spectrum of product **3k** (100 MHz,  $\text{CDCl}_3$ , 14:1 dr)

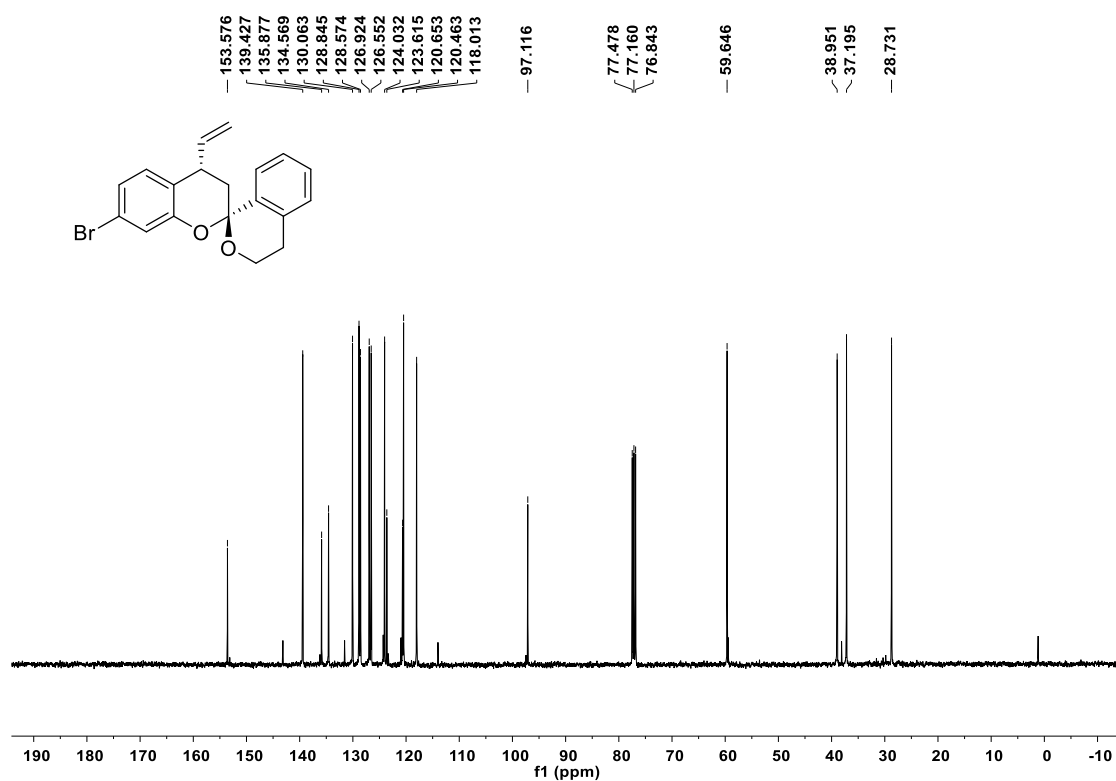

<sup>1</sup>H NMR spectrum of product **31** (400 MHz, CDCl<sub>3</sub>, 14:1 dr)

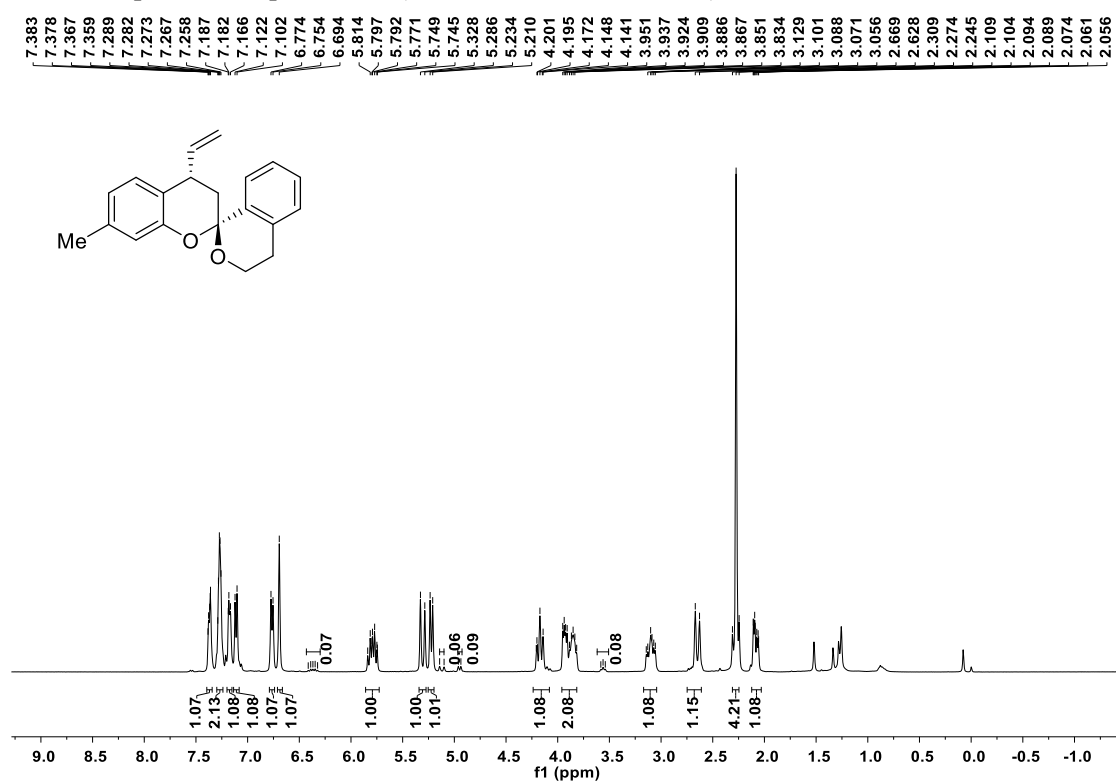

<sup>13</sup>C NMR spectrum of product **31** (100 MHz, CDCl<sub>3</sub>, 14:1 dr)

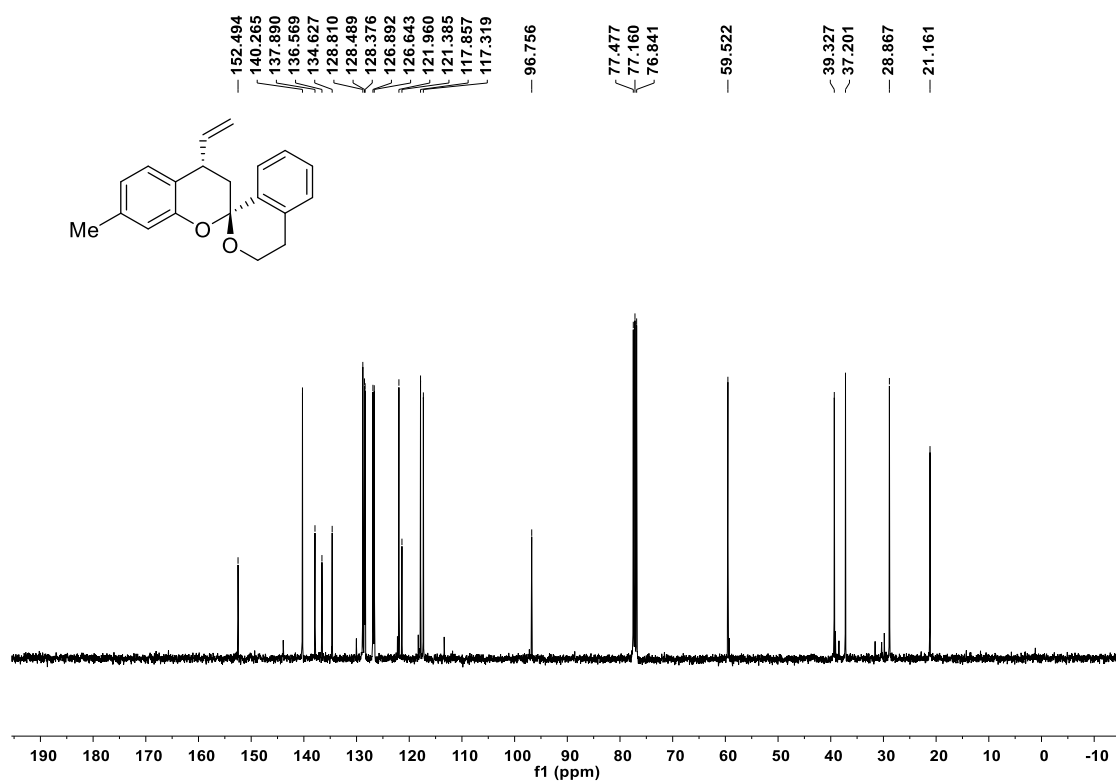

$^1\text{H}$  NMR spectrum of product **3m** (400 MHz,  $\text{CDCl}_3$ , 11:1 dr)

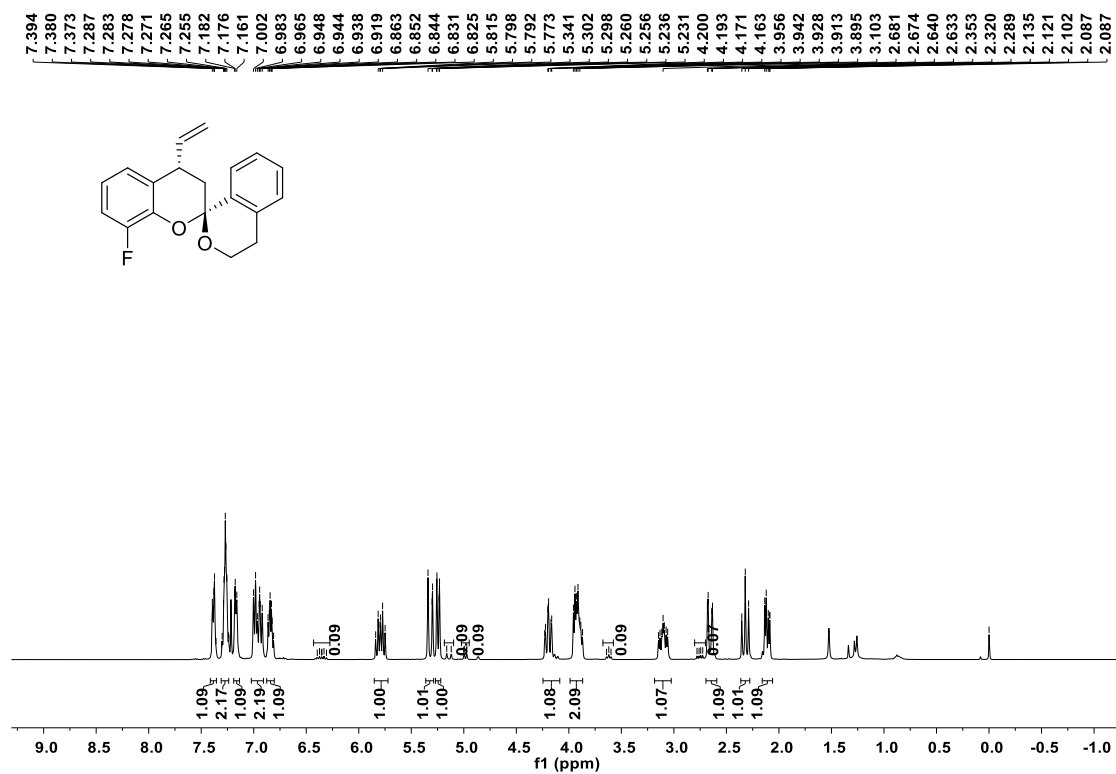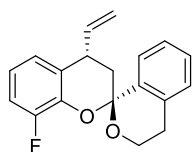

$^{13}\text{C}$  NMR spectrum of product **3m** (100 MHz,  $\text{CDCl}_3$ , 11:1 dr)

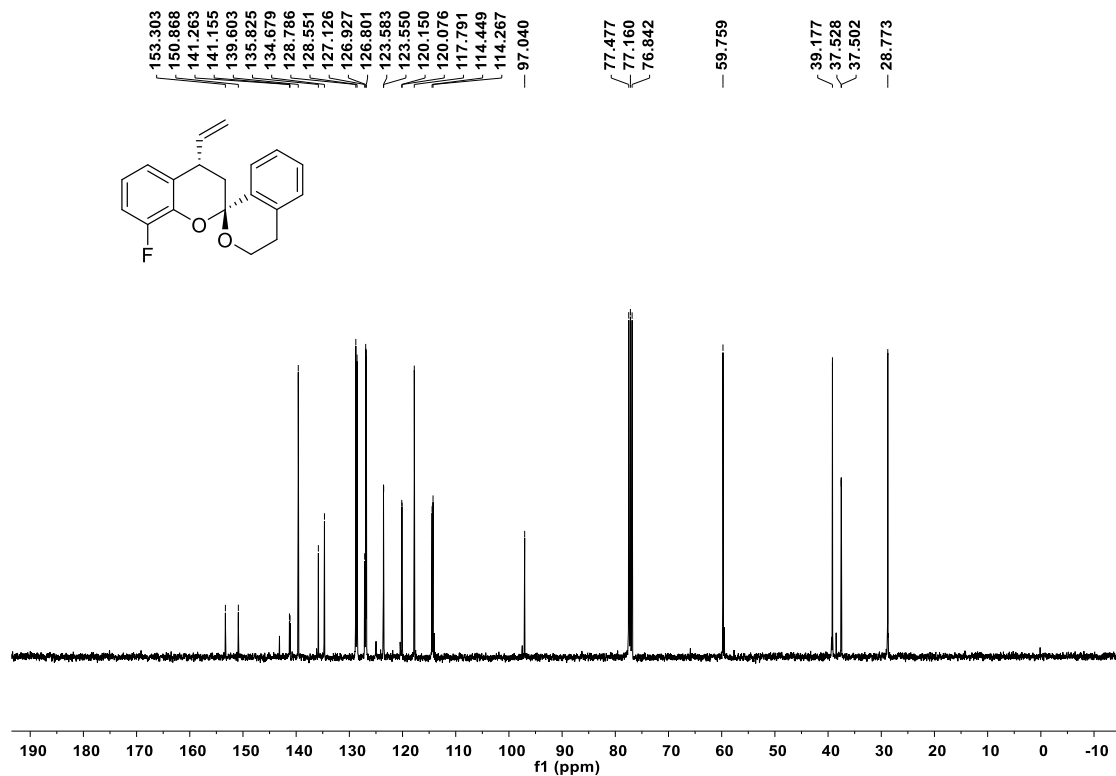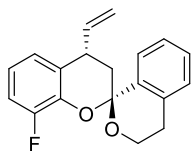



$^{19}\text{F}$  NMR spectrum of product **3m** (376 MHz,  $\text{CDCl}_3$ , 11:1 dr)

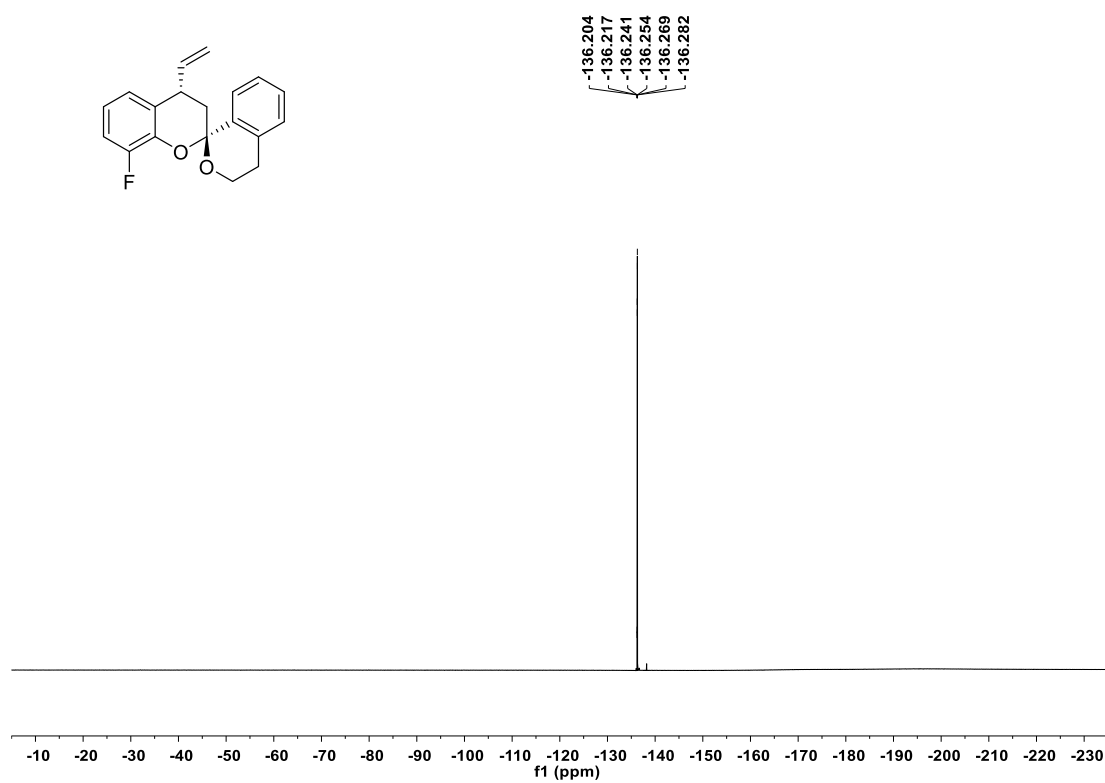

<sup>1</sup>H NMR spectrum of product **3n** (400 MHz, CDCl<sub>3</sub>, 14:1 dr)

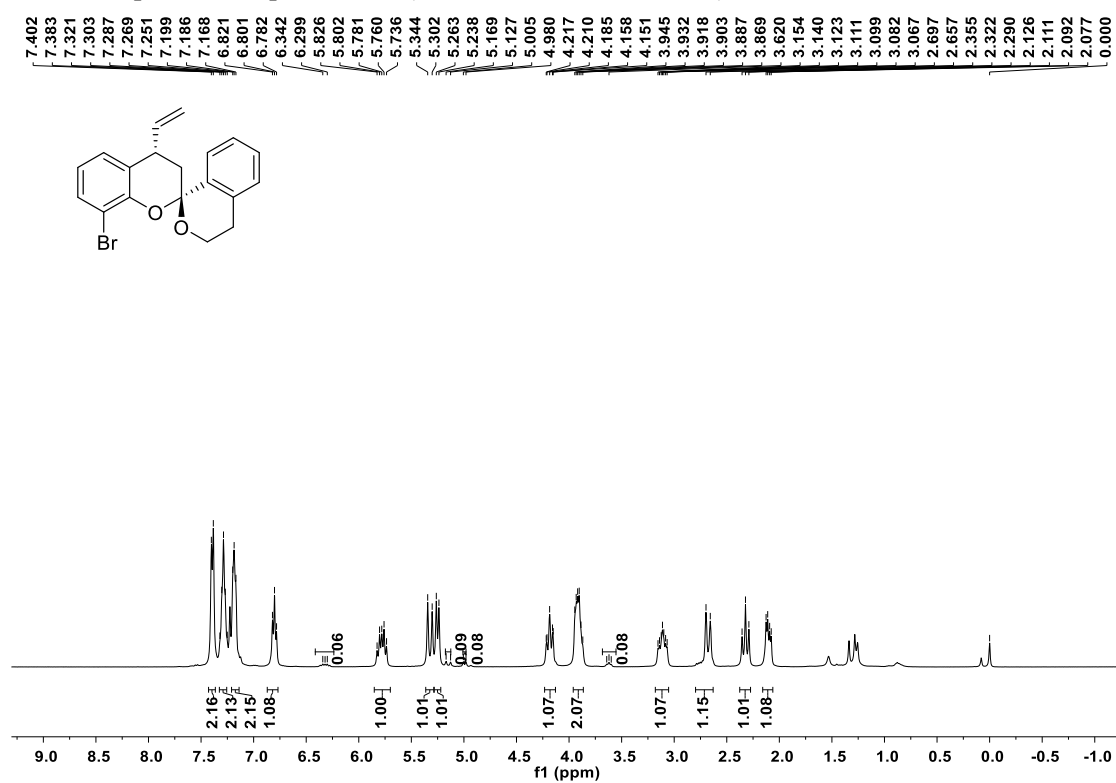

<sup>13</sup>C NMR spectrum of product **3n** (100 MHz, CDCl<sub>3</sub>, 14:1 dr)

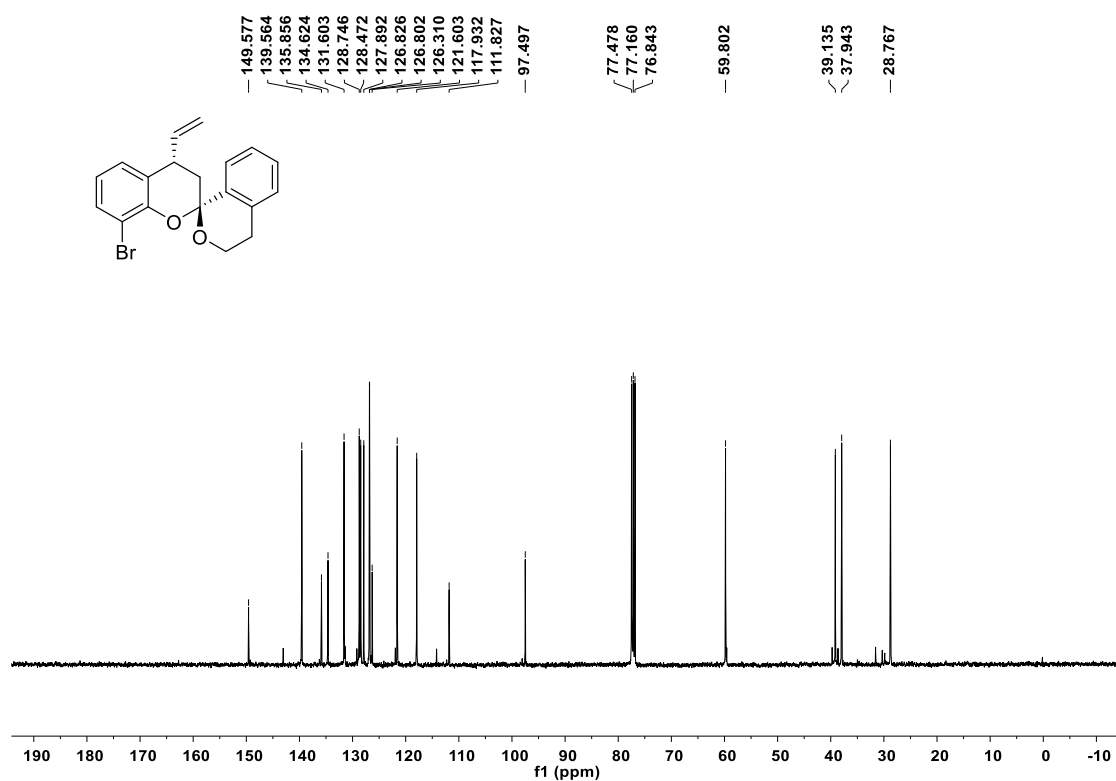

<sup>1</sup>H NMR spectrum of product **3o** (400 MHz, CDCl<sub>3</sub>, 12:1 dr)

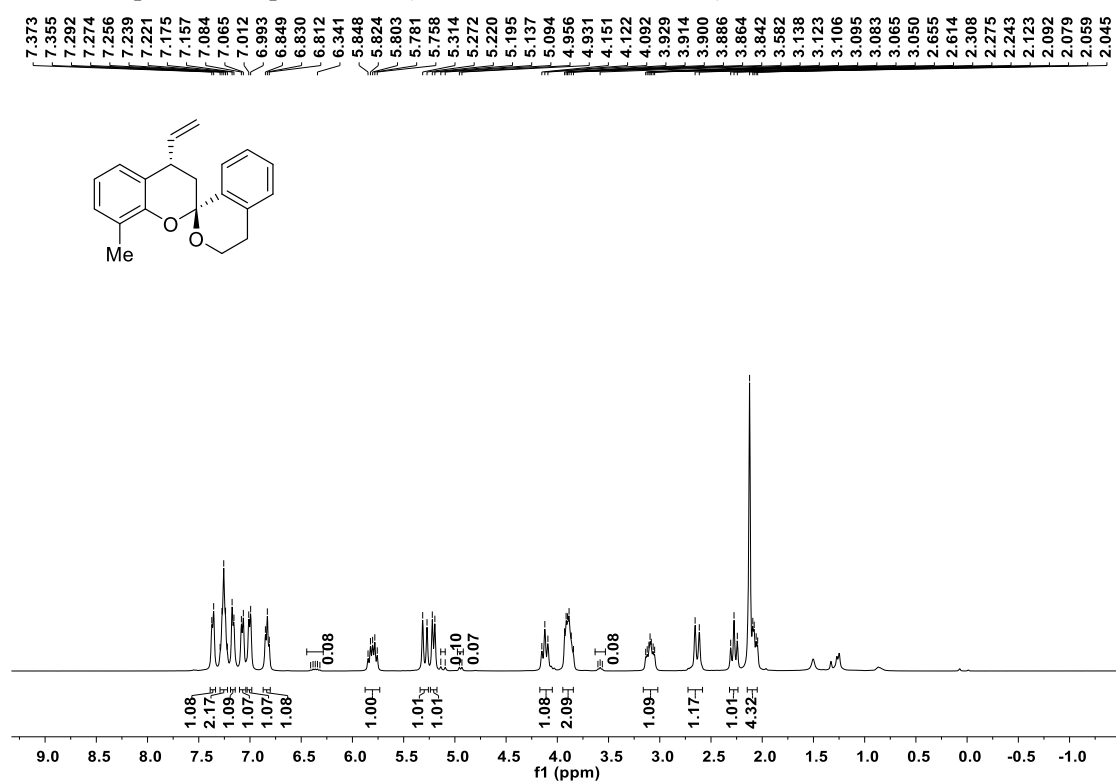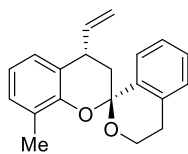

<sup>13</sup>C NMR spectrum of product **3o** (100 MHz, CDCl<sub>3</sub>, 12:1 dr)

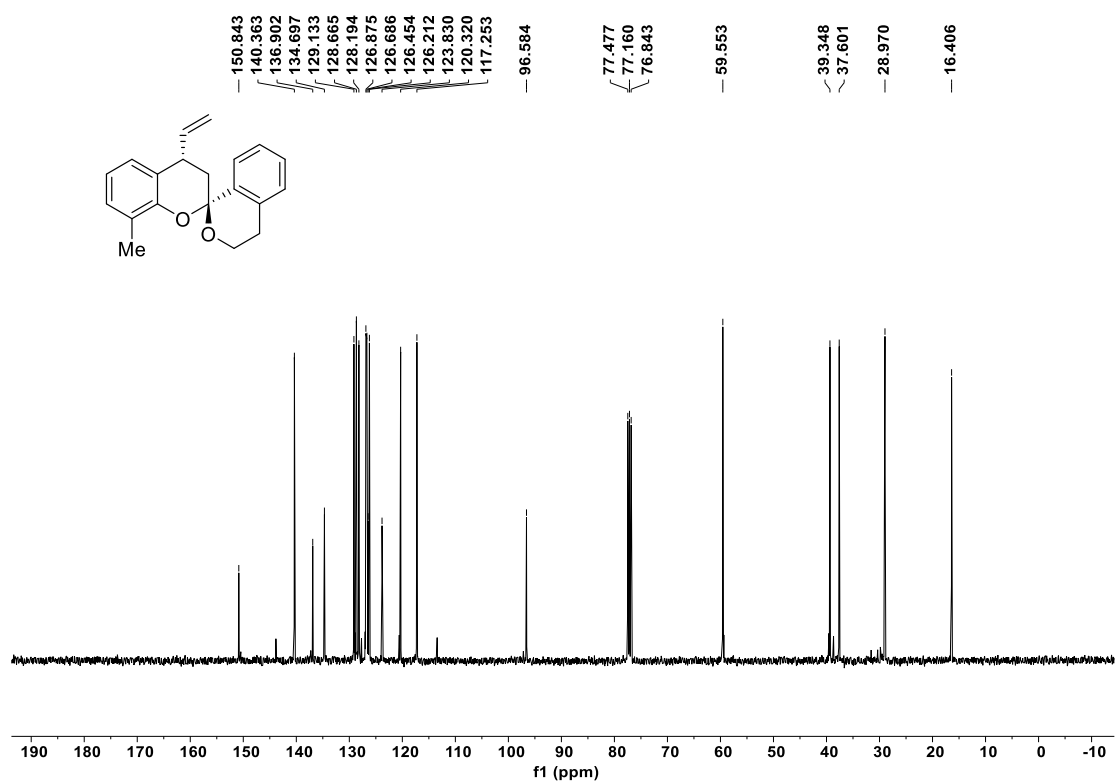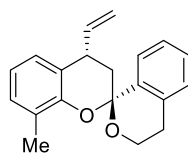

<sup>1</sup>H NMR spectrum of product **3p** (400 MHz, CDCl<sub>3</sub>, 11:1 dr)

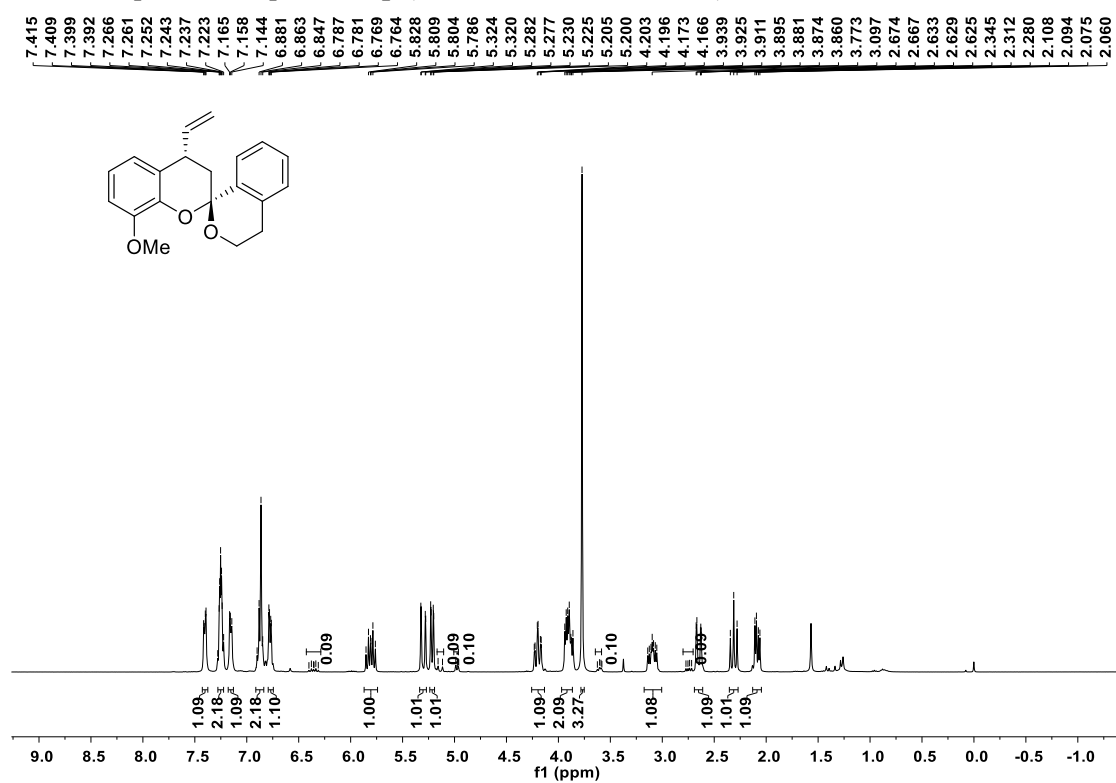

<sup>13</sup>C NMR spectrum of product **3p** (100 MHz, CDCl<sub>3</sub>, 11:1 dr)

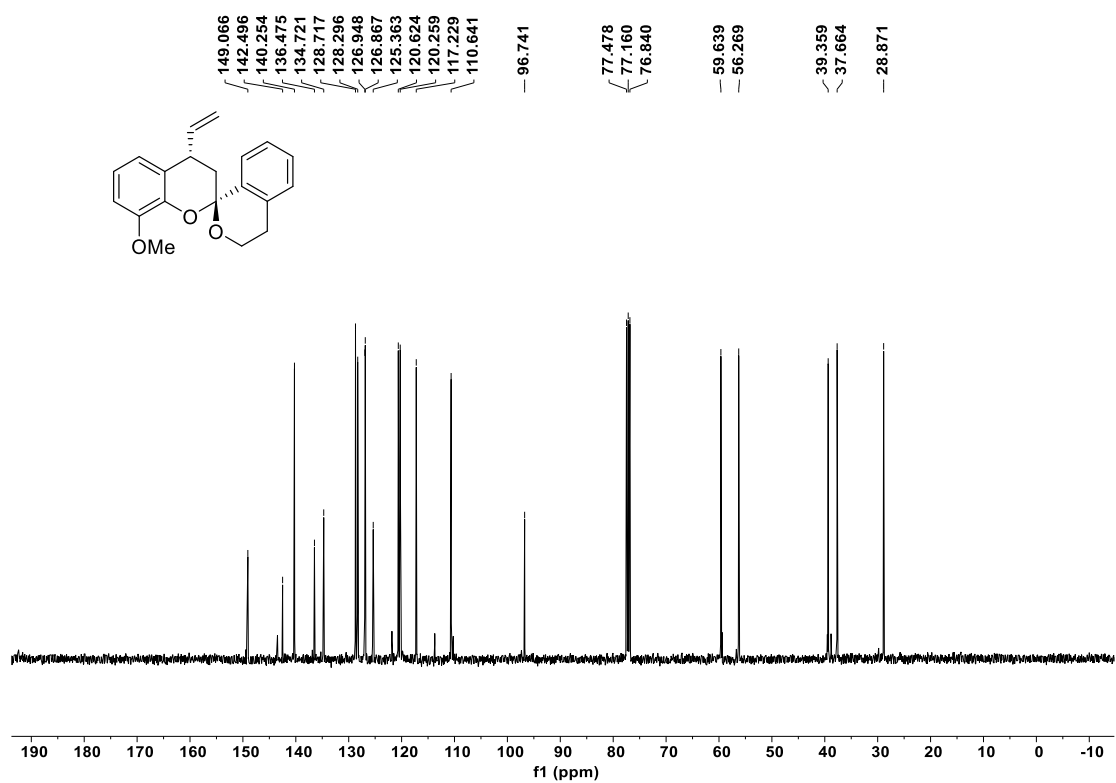

$^1\text{H}$  NMR spectrum of product **3q** (400 MHz,  $\text{CDCl}_3$ , 17:1 dr)

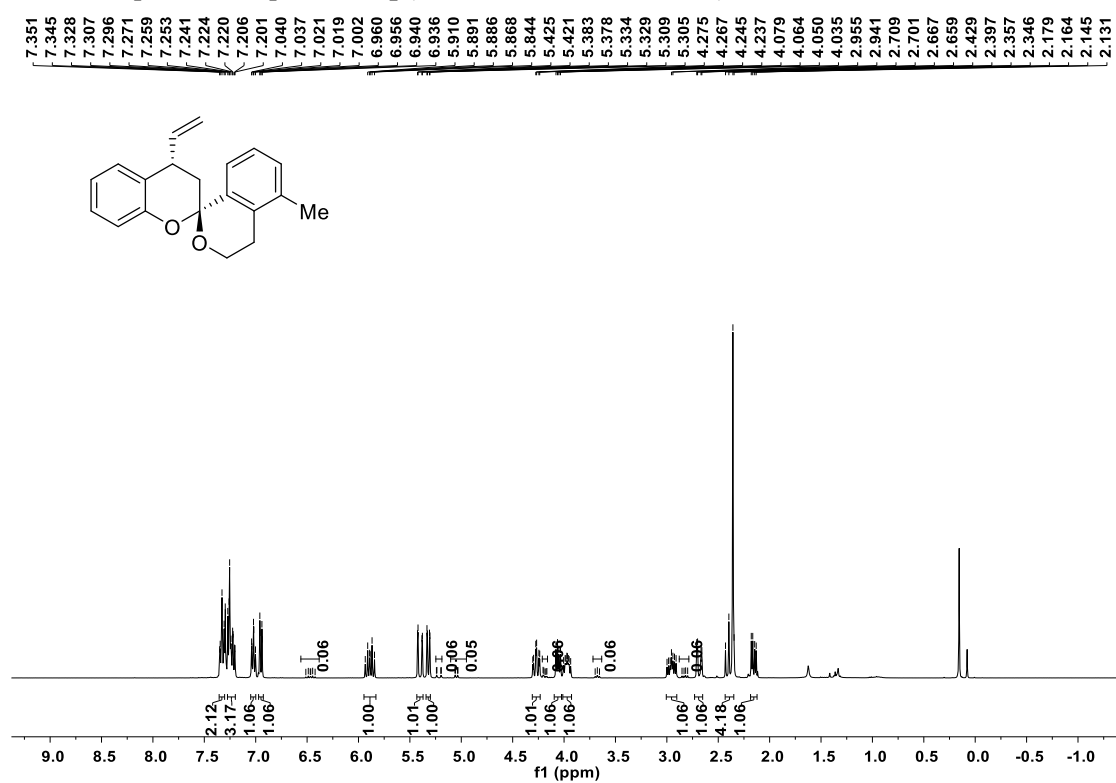

$^{13}\text{C}$  NMR spectrum of product **3q** (100 MHz,  $\text{CDCl}_3$ , 17:1 dr)

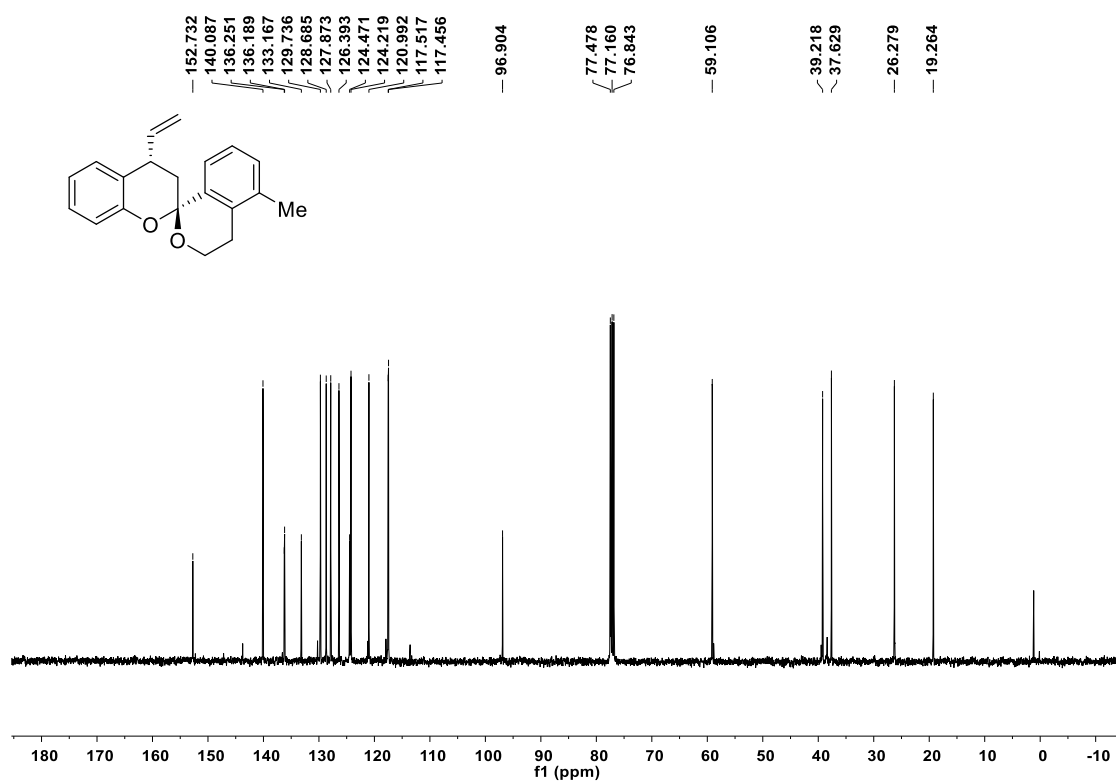

<sup>1</sup>H NMR spectrum of product **3r** (400 MHz, CDCl<sub>3</sub>, 15:1 dr)

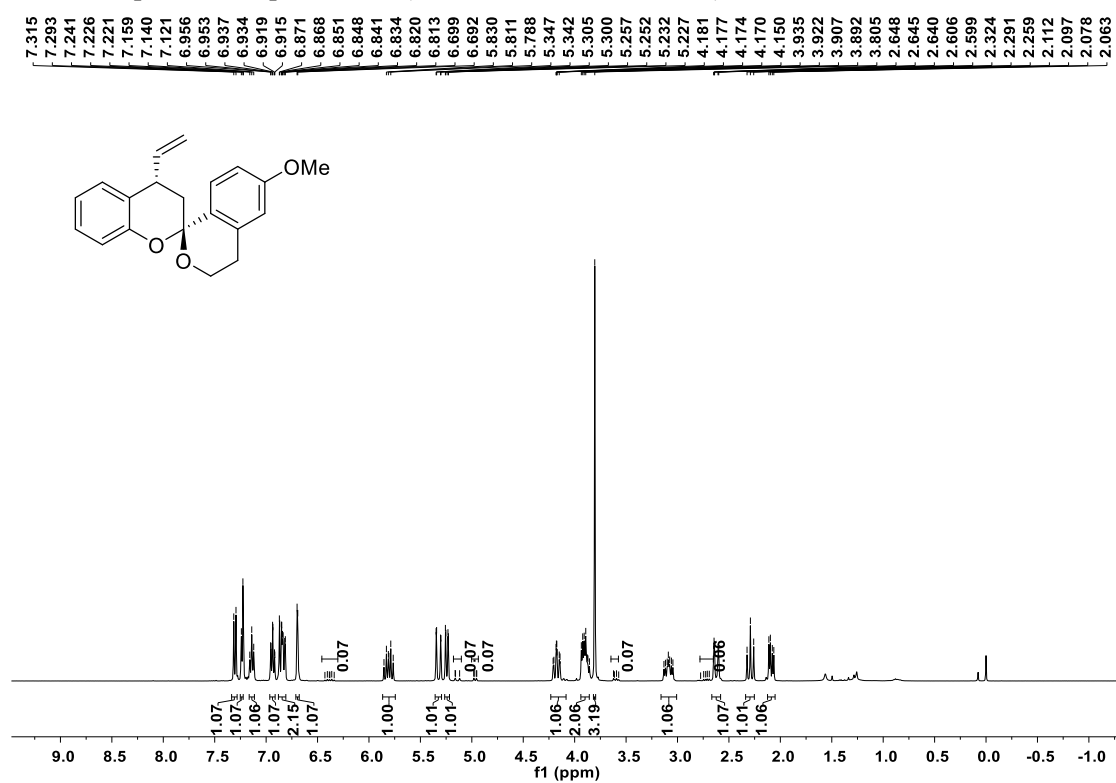

<sup>13</sup>C NMR spectrum of product **3r** (100 MHz, CDCl<sub>3</sub>, 15:1 dr)

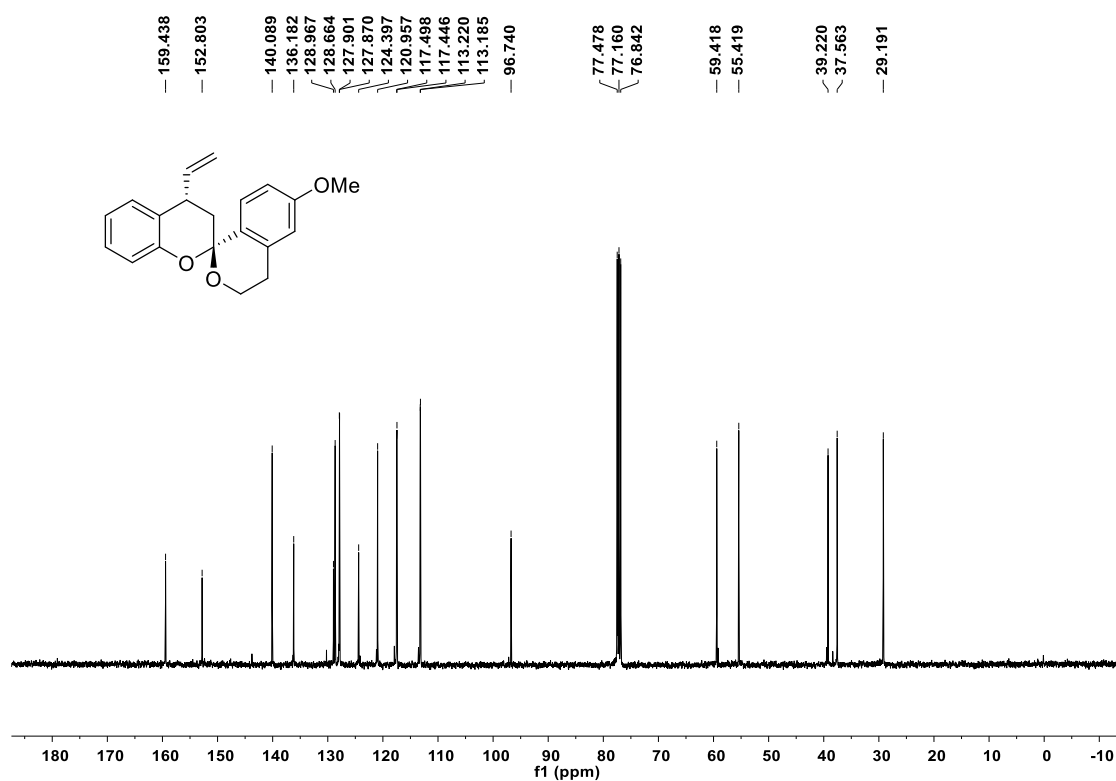

<sup>1</sup>H NMR spectrum of product **3s** (400 MHz, CDCl<sub>3</sub>, 13:1 dr)

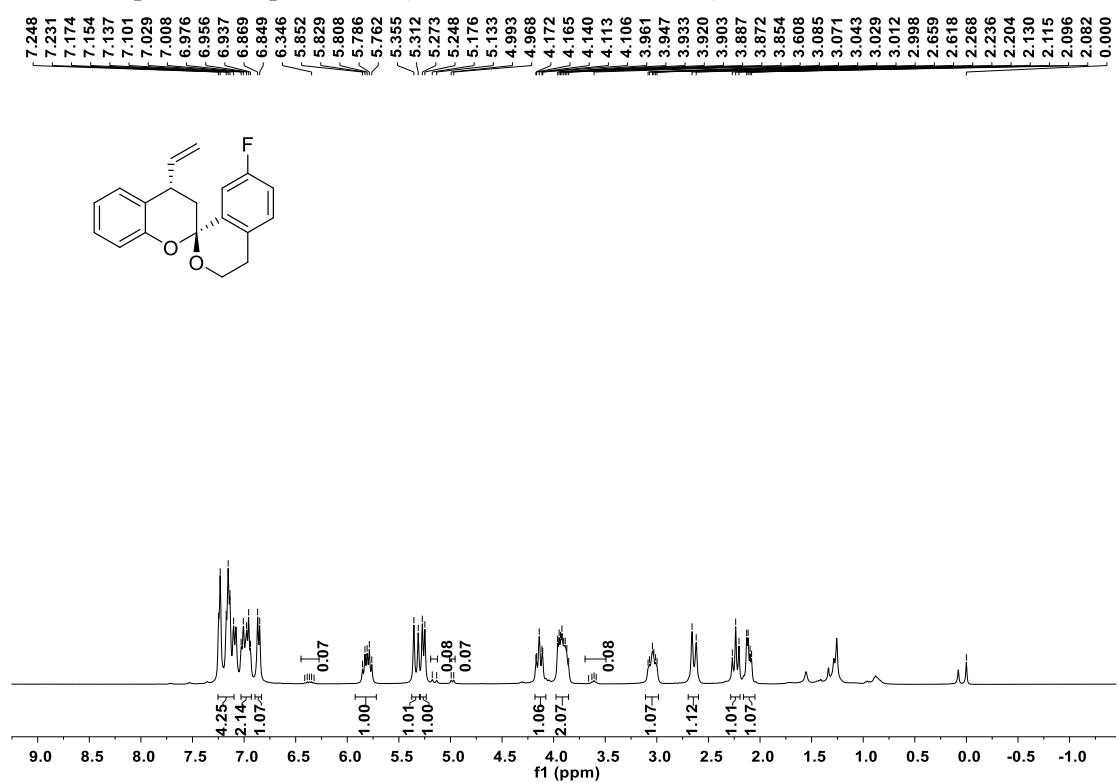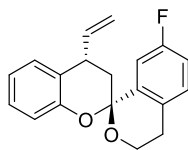

<sup>13</sup>C NMR spectrum of product **3s** (100 MHz, CDCl<sub>3</sub>, 13:1 dr)

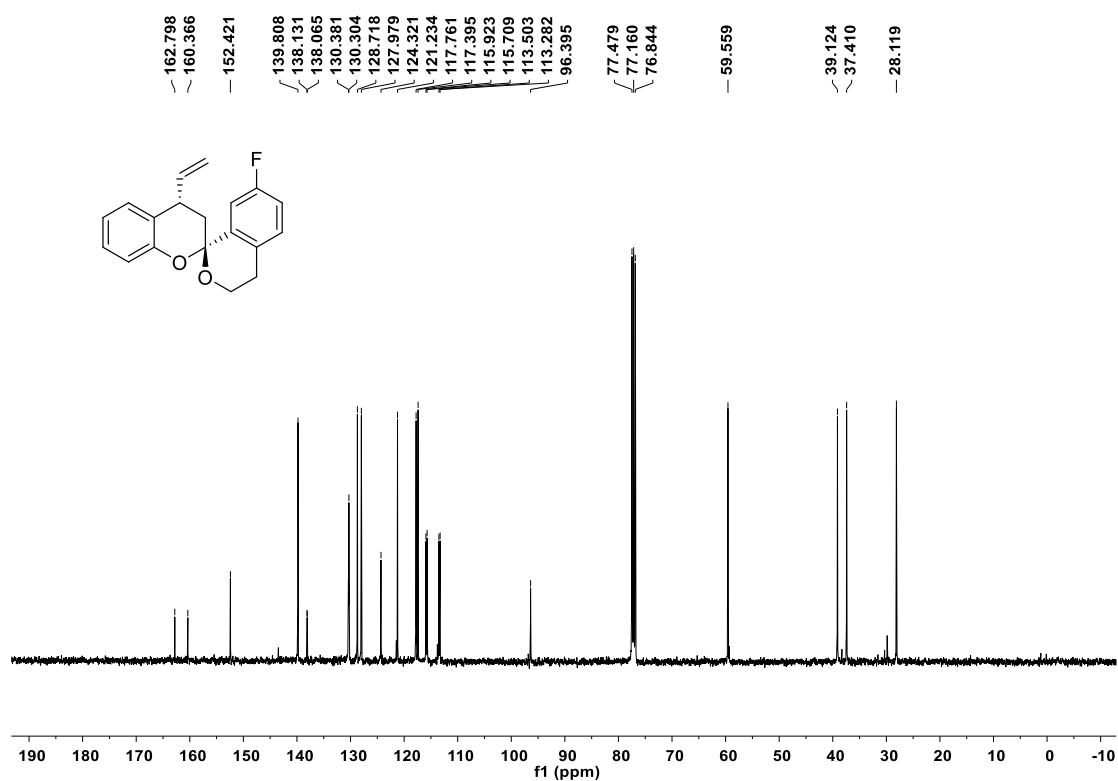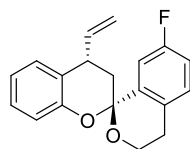

$^{19}\text{F}$  NMR spectrum of product **3s** (376 MHz,  $\text{CDCl}_3$ , 13:1 dr)

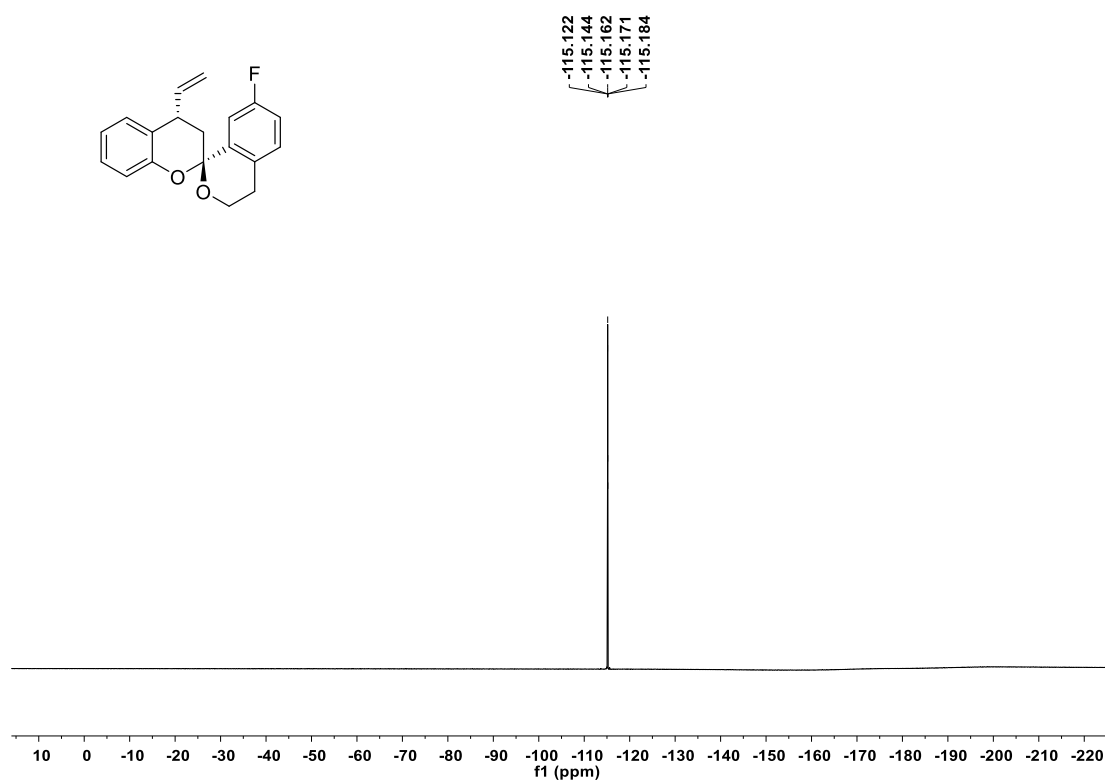



<sup>1</sup>H NMR spectrum of product **3t** (400 MHz, CDCl<sub>3</sub>, 12:1 dr)

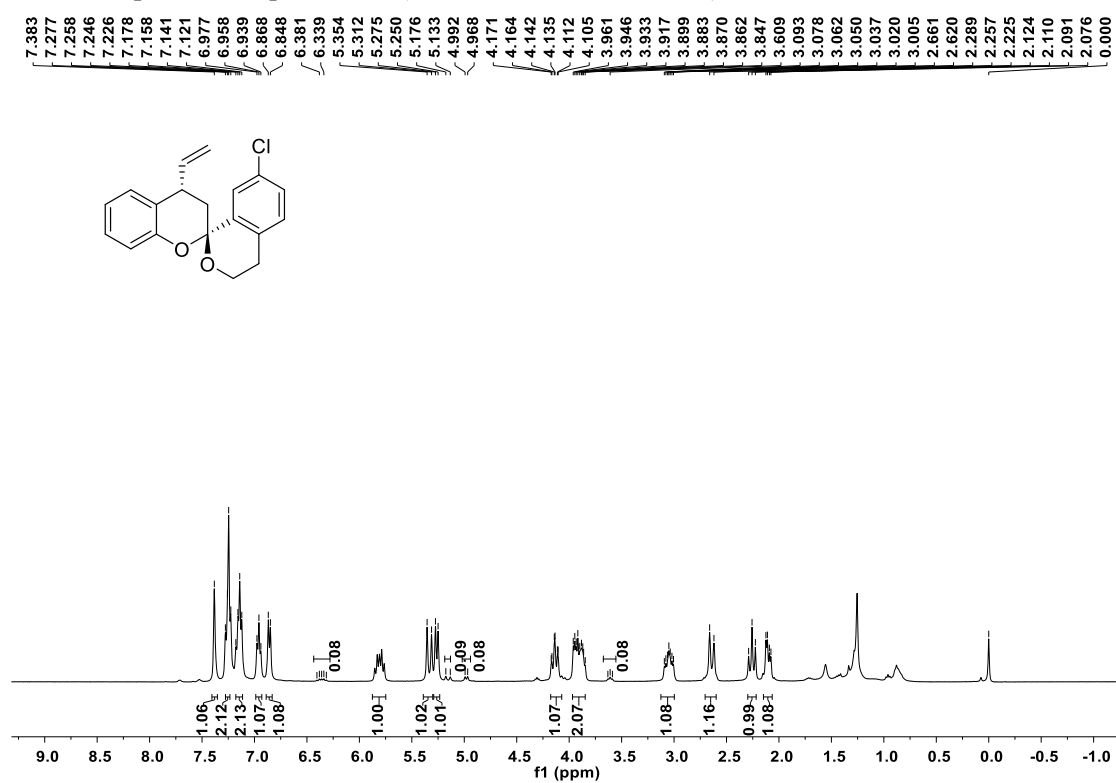

<sup>13</sup>C NMR spectrum of product **3t** (100 MHz, CDCl<sub>3</sub>, 12:1 dr)

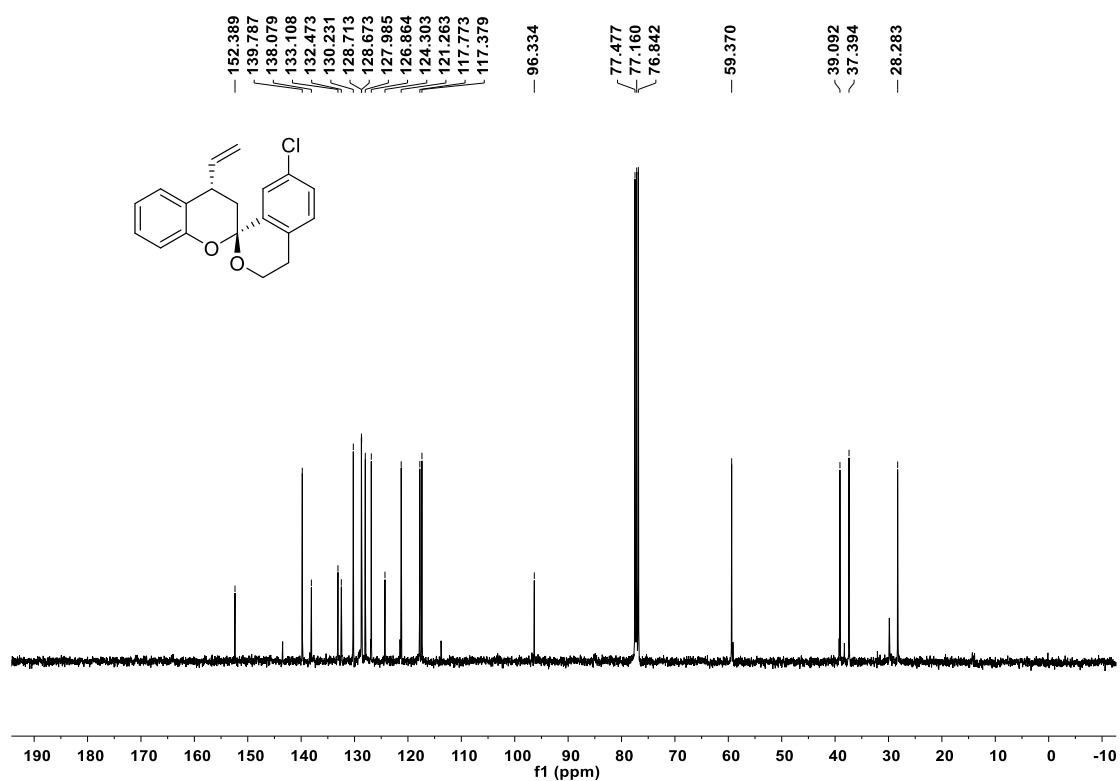

$^1\text{H}$  NMR spectrum of product **3u** (400 MHz,  $\text{CDCl}_3$ , 12:1 dr)

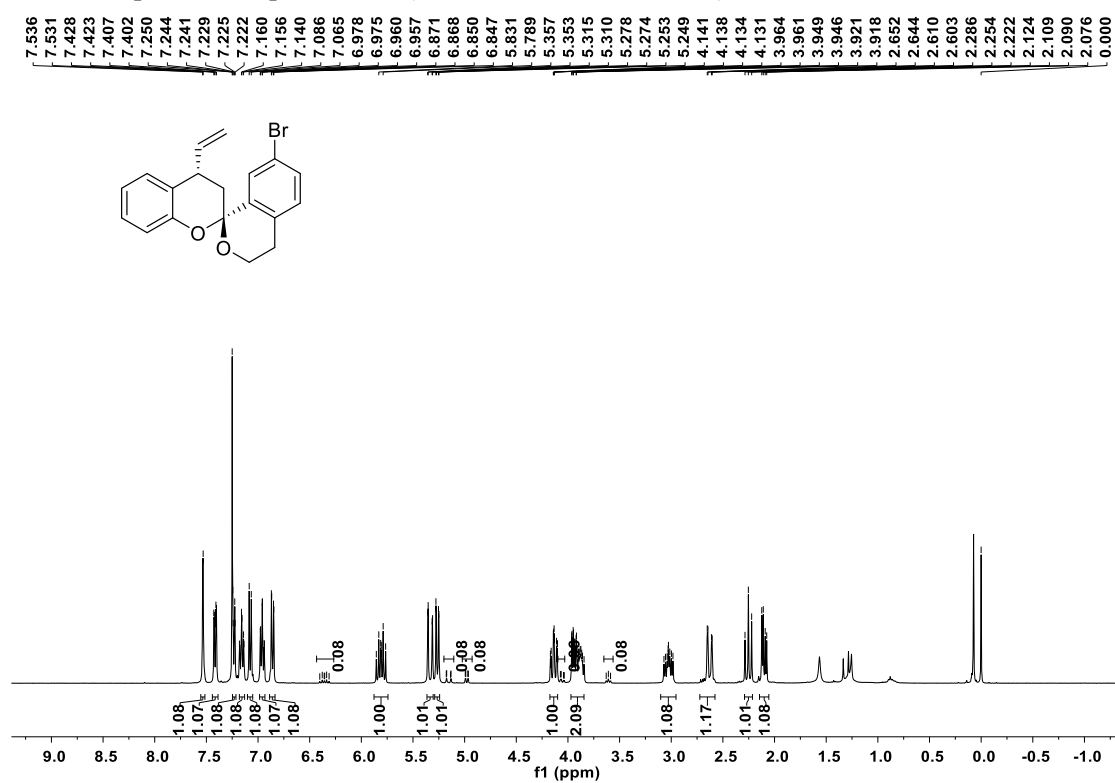

$^{13}\text{C}$  NMR spectrum of product **3u** (100 MHz,  $\text{CDCl}_3$ , 12:1 dr)

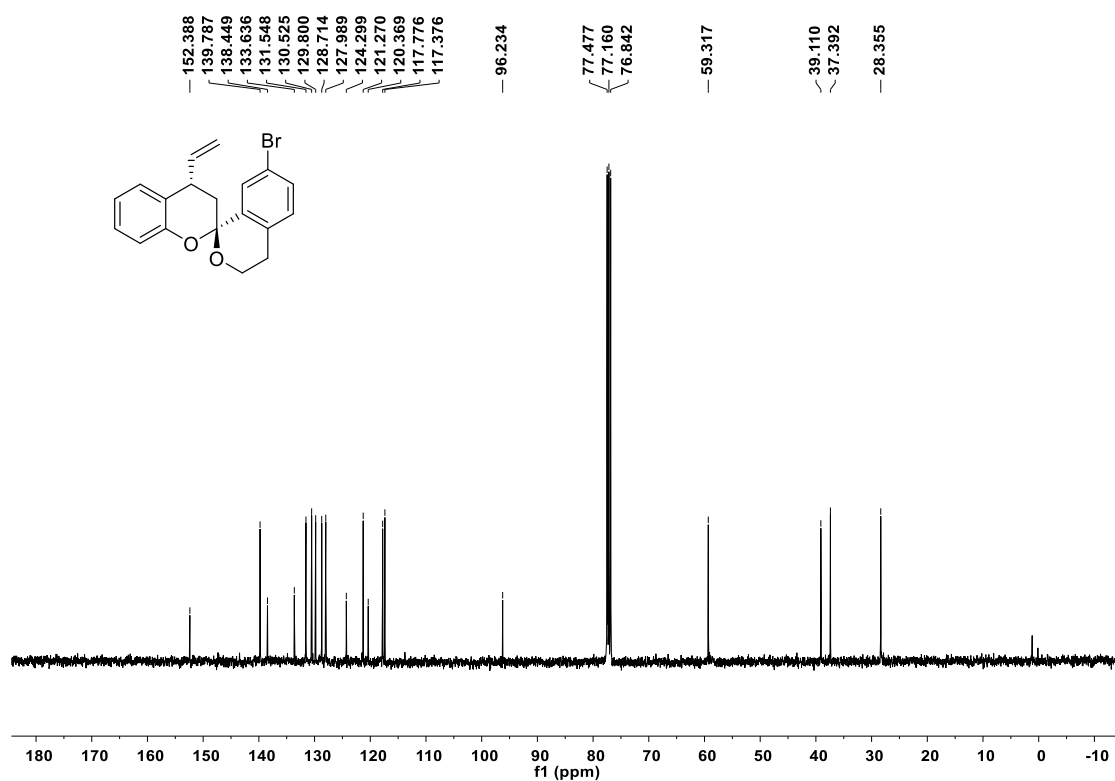

<sup>1</sup>H NMR spectrum of product **3v** (400 MHz, CDCl<sub>3</sub>, 16:1 dr)

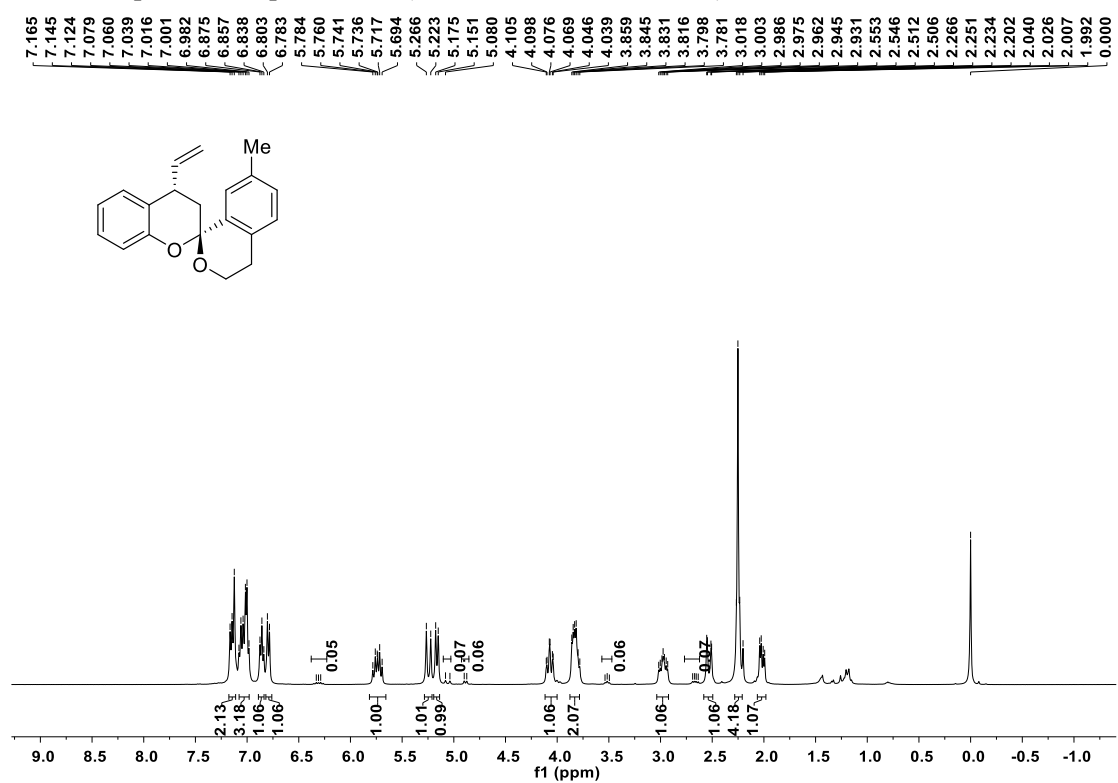

<sup>13</sup>C NMR spectrum of product **3v** (100 MHz, CDCl<sub>3</sub>, 16:1 dr)

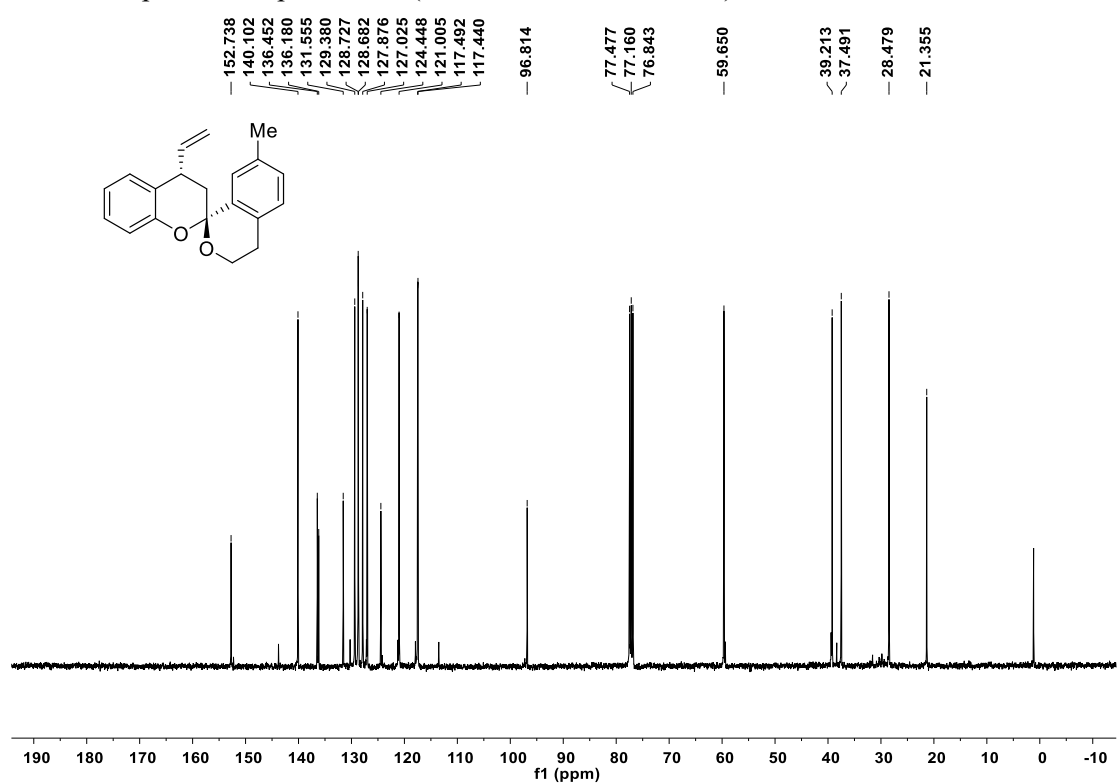

<sup>1</sup>H NMR spectrum of product **3w** (400 MHz, CDCl<sub>3</sub>, 16:1 dr)

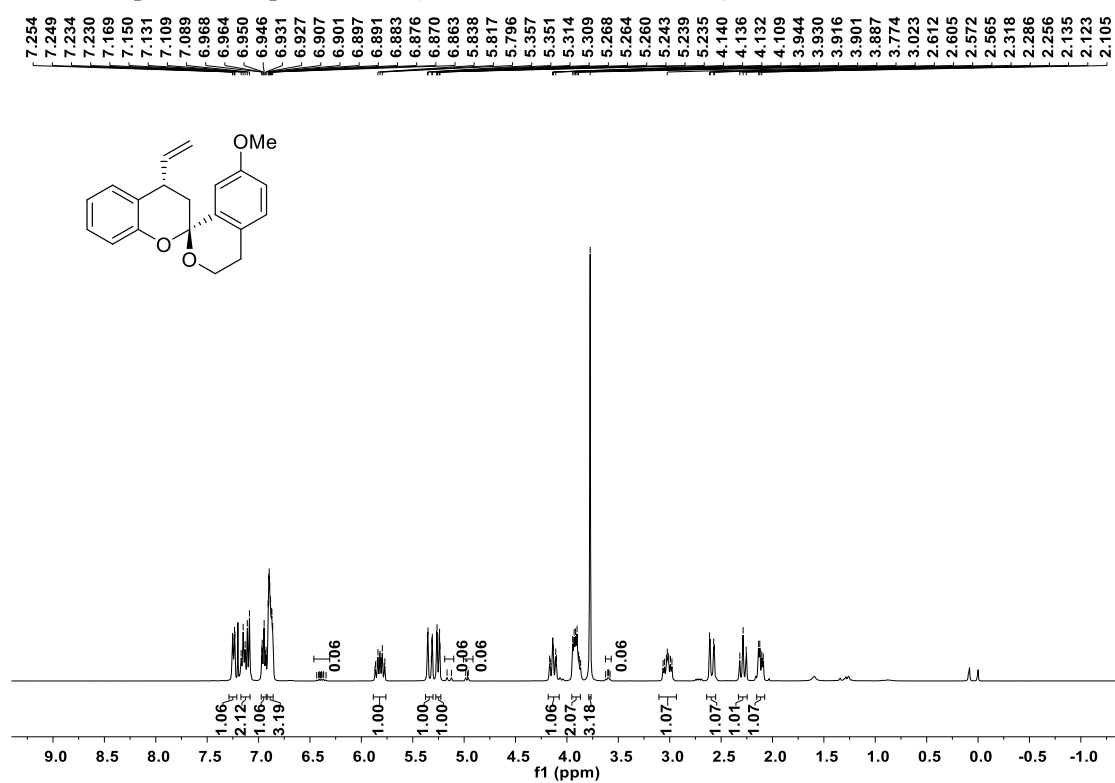

<sup>13</sup>C NMR spectrum of product **3w** (100 MHz, CDCl<sub>3</sub>, 16:1 dr)

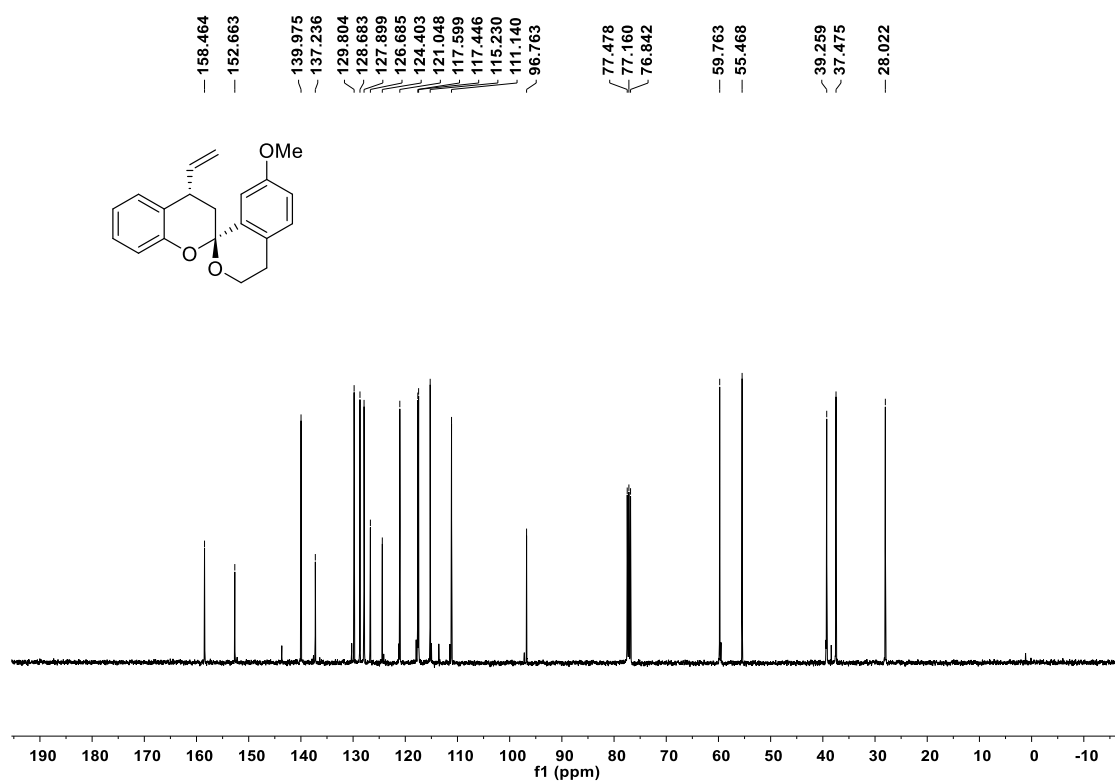

$^1\text{H}$  NMR spectrum of product **5a** (400 MHz,  $\text{CDCl}_3$ , 6:1 dr)

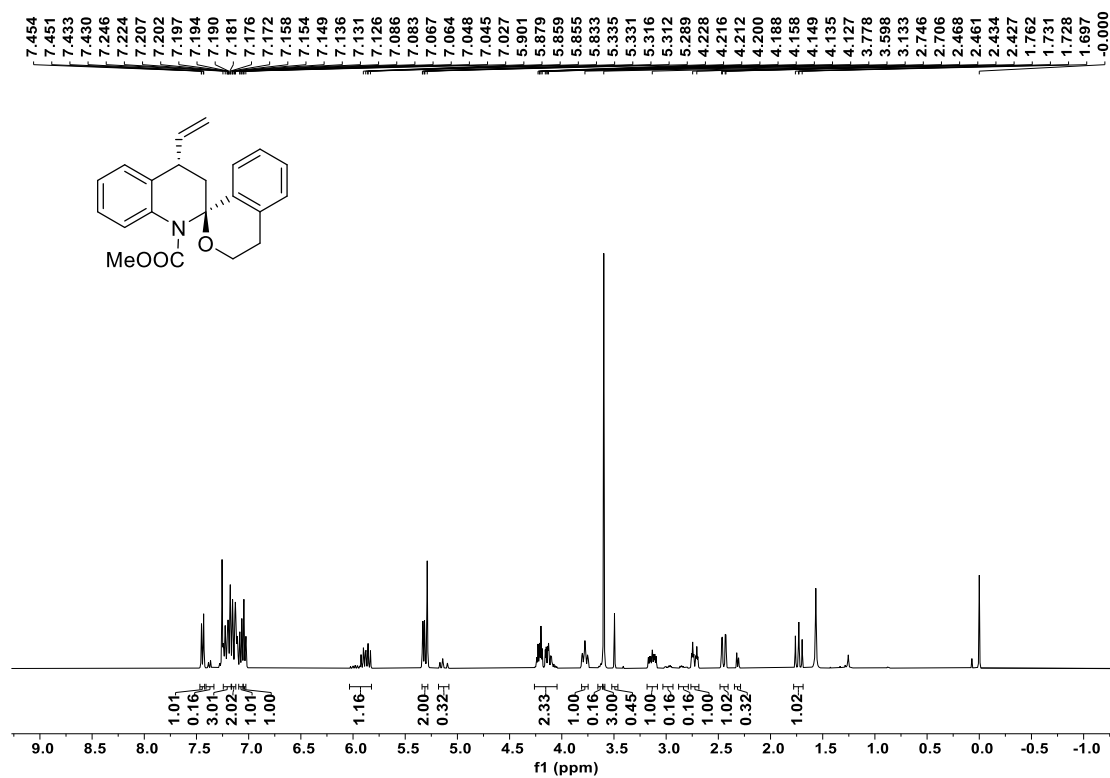

$^{13}\text{C}$  NMR spectrum of product **5a** (100 MHz,  $\text{CDCl}_3$ , 6:1 dr)

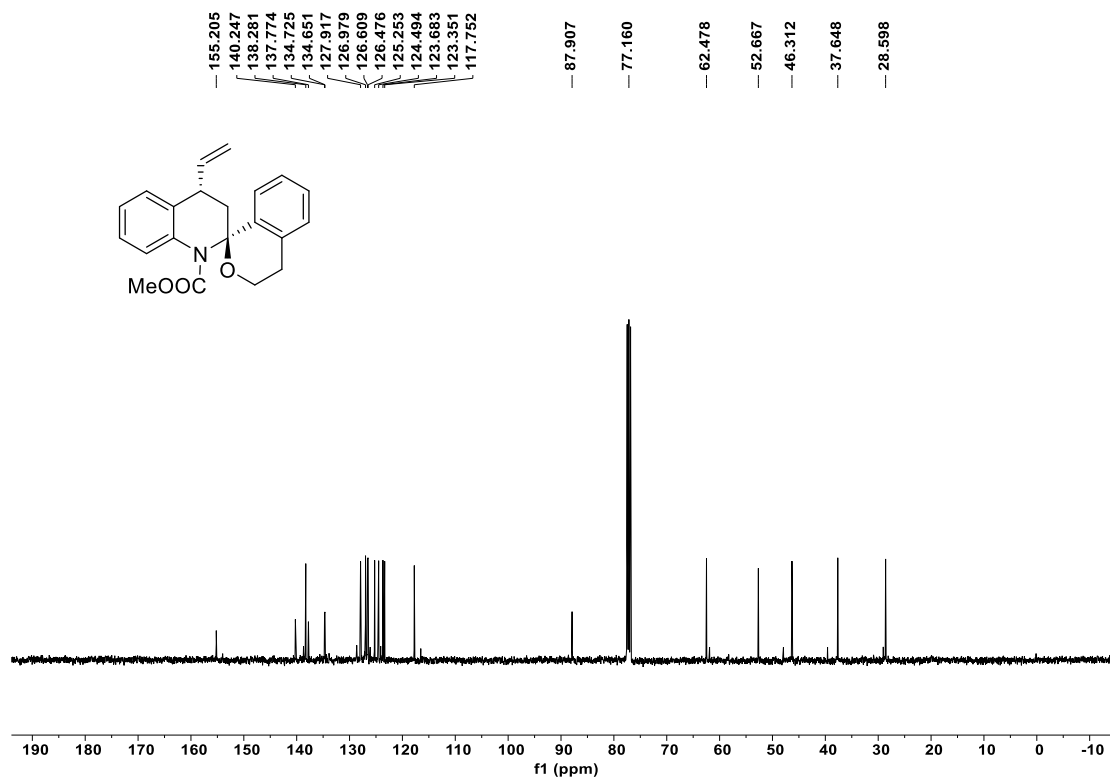

<sup>1</sup>H NMR spectrum of product **5b** (400 MHz, CDCl<sub>3</sub>, 6:1 dr)

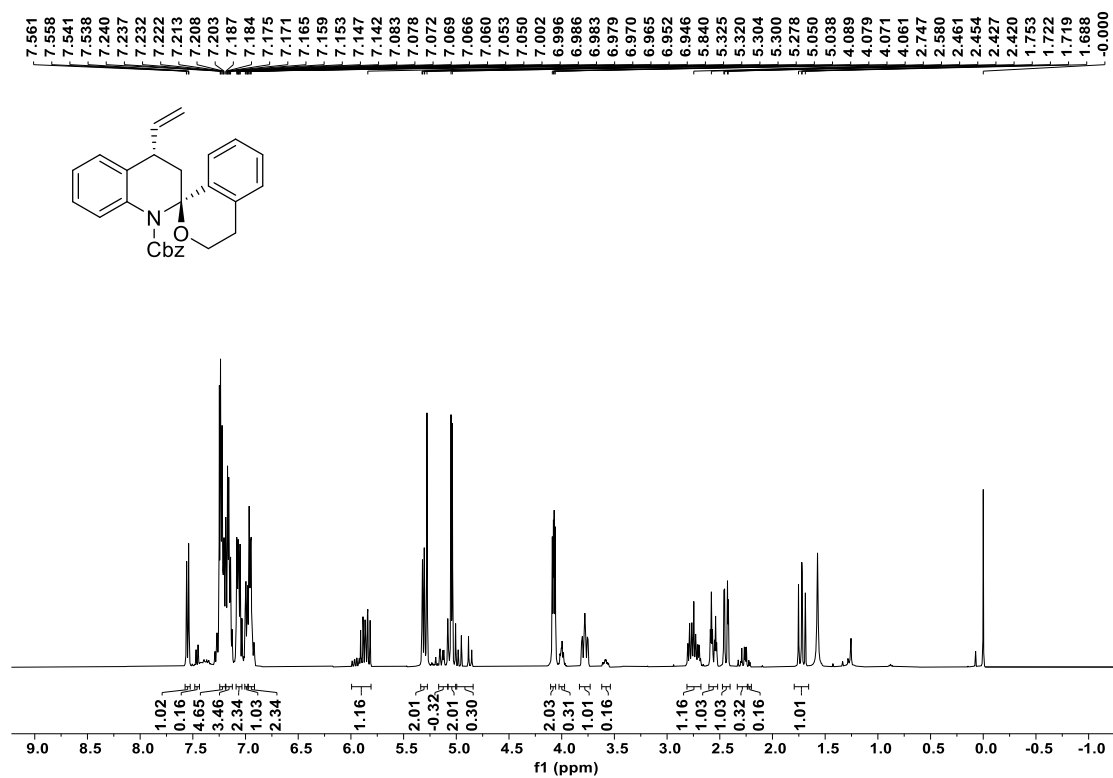

<sup>13</sup>C NMR spectrum of product **5b** (100 MHz, CDCl<sub>3</sub>, 6:1 dr)

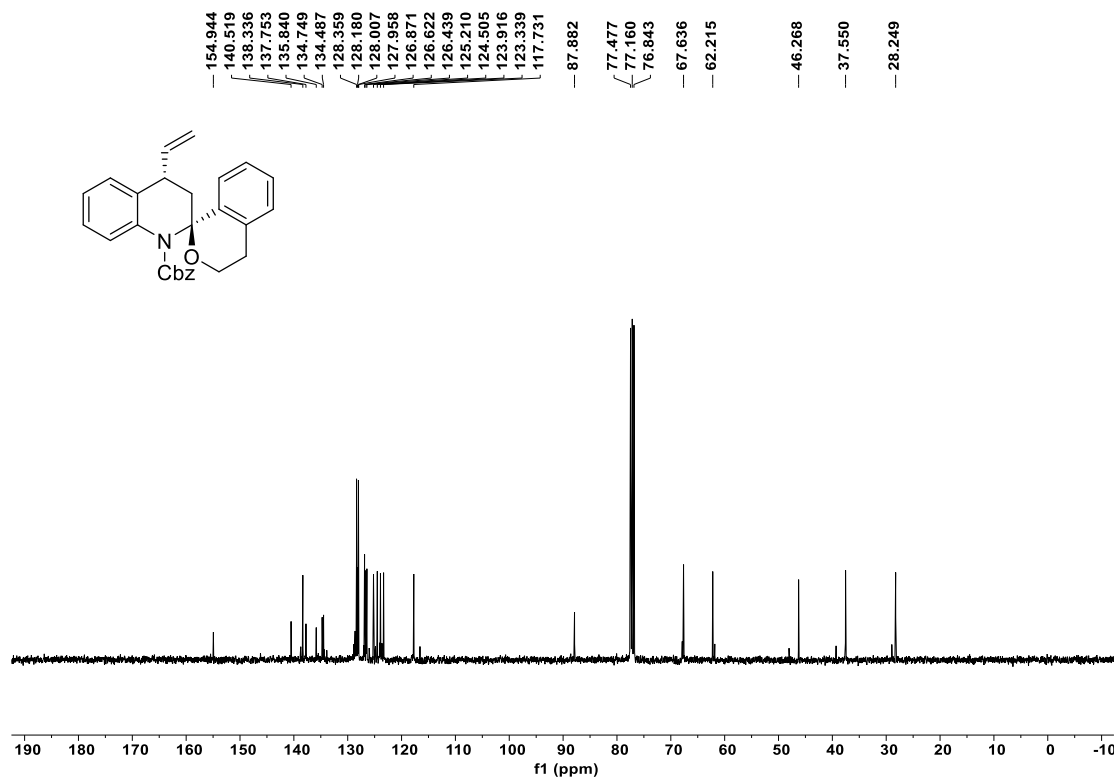

<sup>1</sup>H NMR spectrum of product **5c** (400 MHz, CDCl<sub>3</sub>, 4:1 dr)

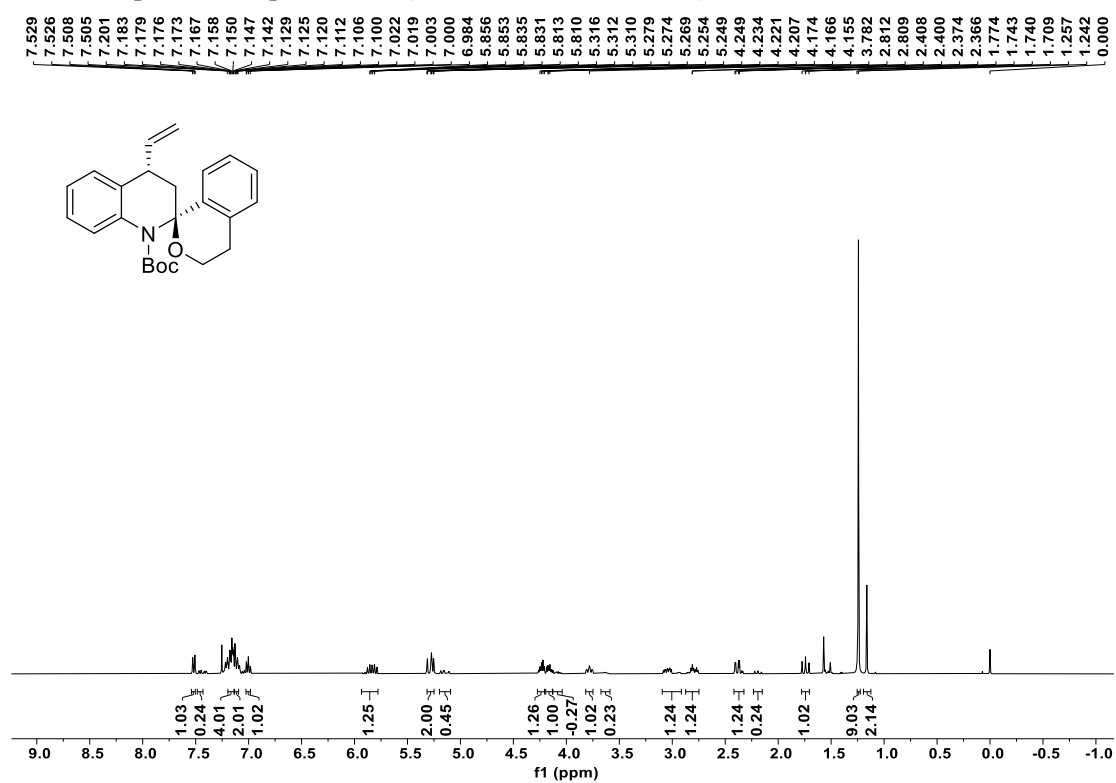

<sup>13</sup>C NMR spectrum of product **5c** (100 MHz, CDCl<sub>3</sub>, 4:1 dr)

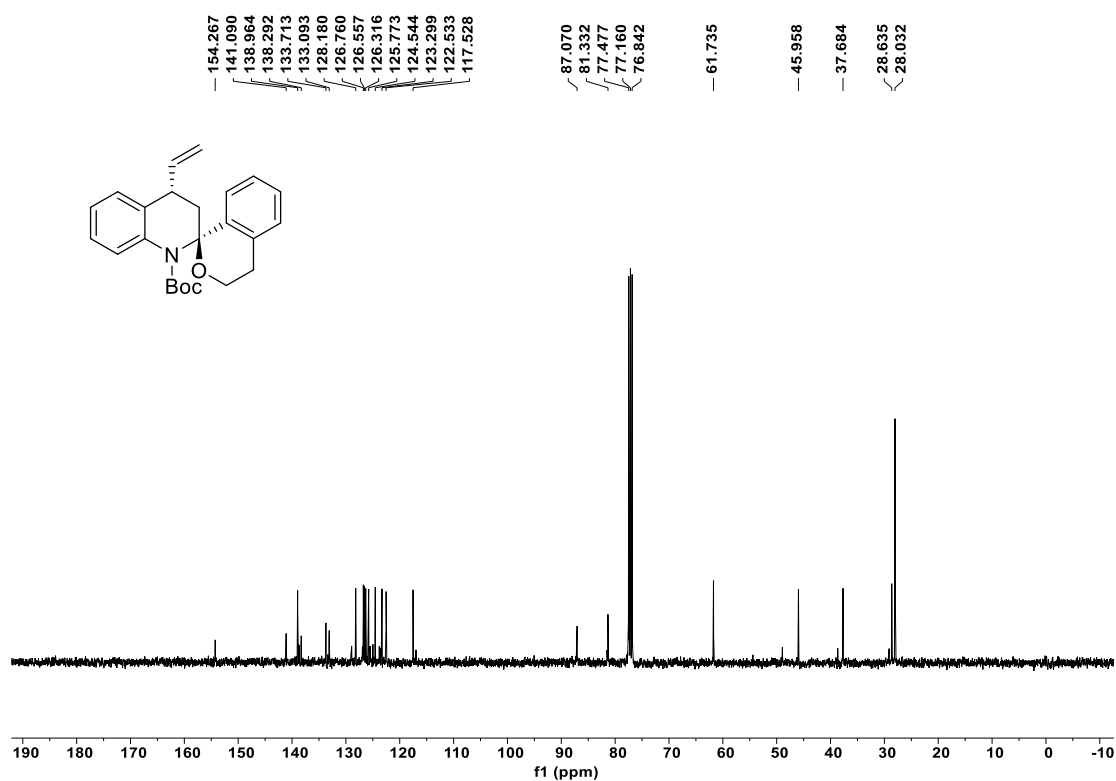

<sup>1</sup>H NMR spectrum of product **5d** (400 MHz, CDCl<sub>3</sub>, 7:1 dr)

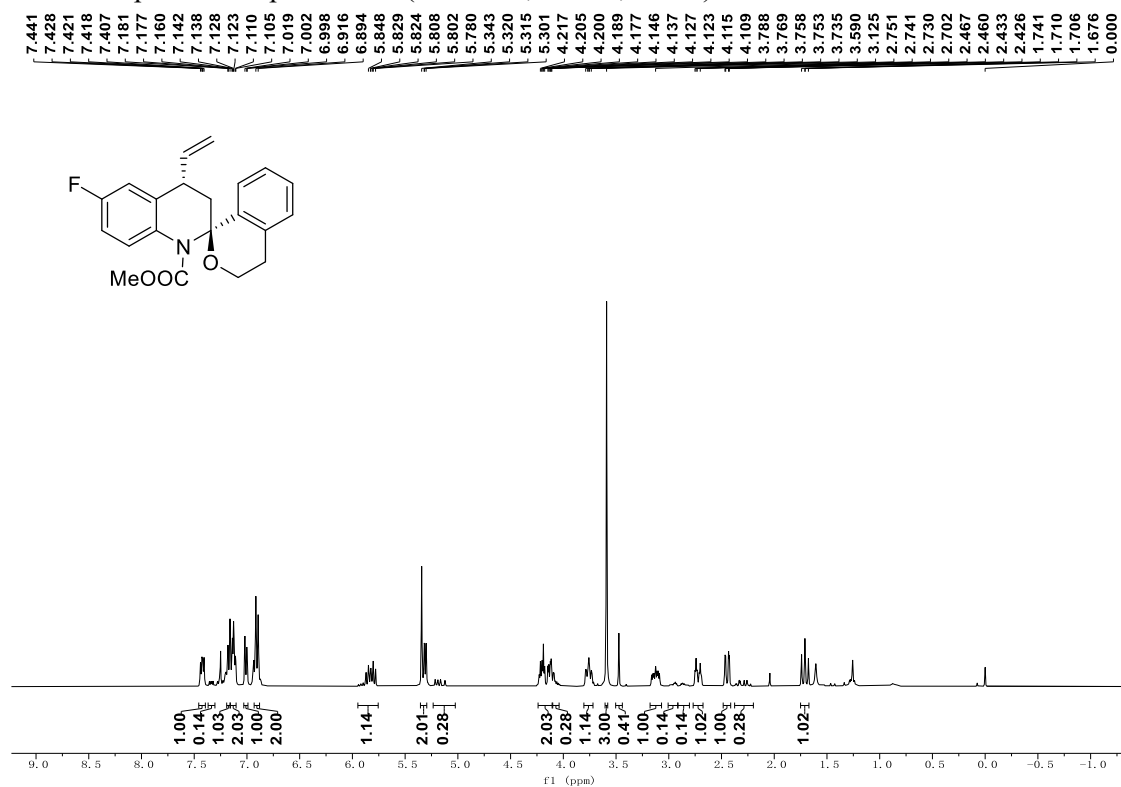

<sup>13</sup>C NMR spectrum of product **5d** (100 MHz, CDCl<sub>3</sub>, 7:1 dr)

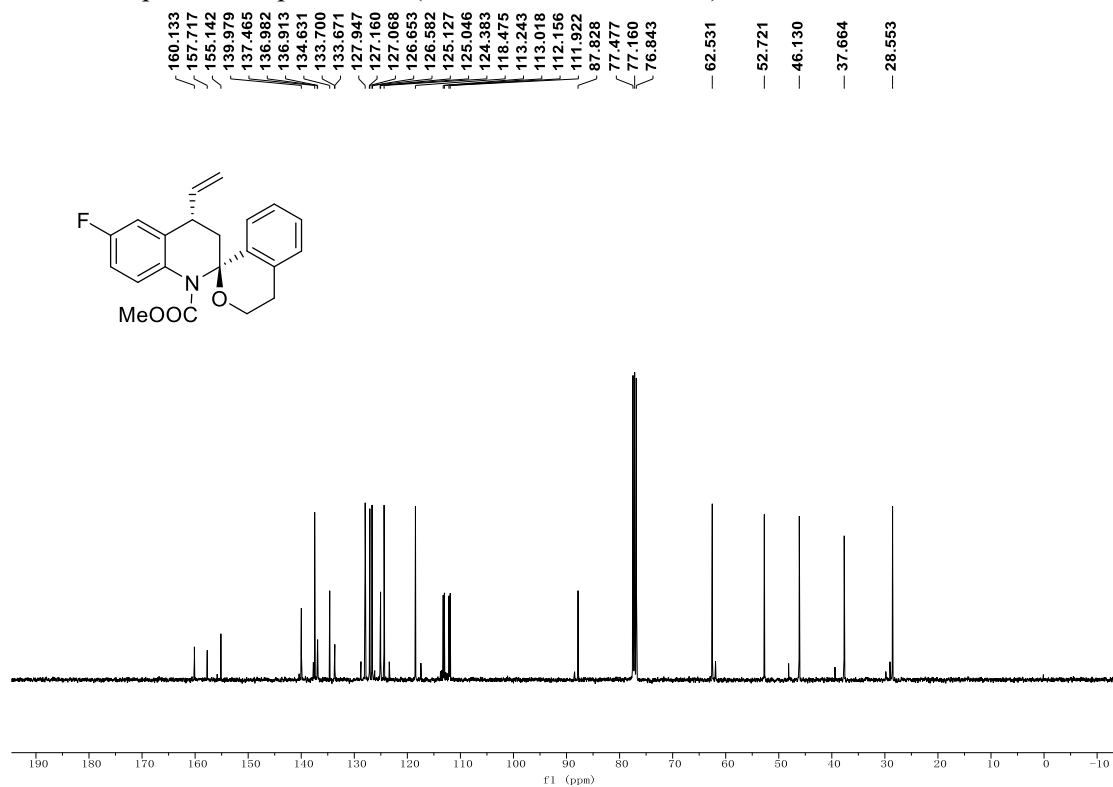



$^{19}\text{F}$  NMR spectrum of product **5d** (376 MHz,  $\text{CDCl}_3$ , 7:1 dr)

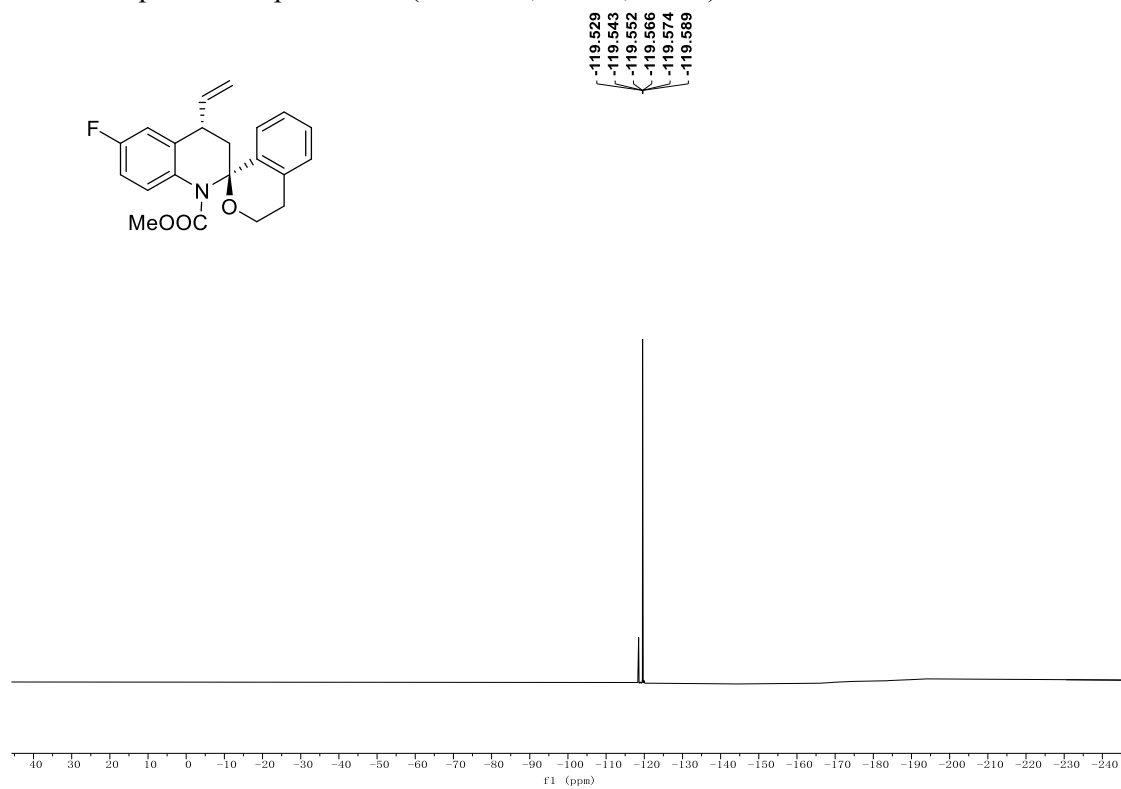

<sup>1</sup>H NMR spectrum of product **5e** (400 MHz, CDCl<sub>3</sub>, 4:1 dr)

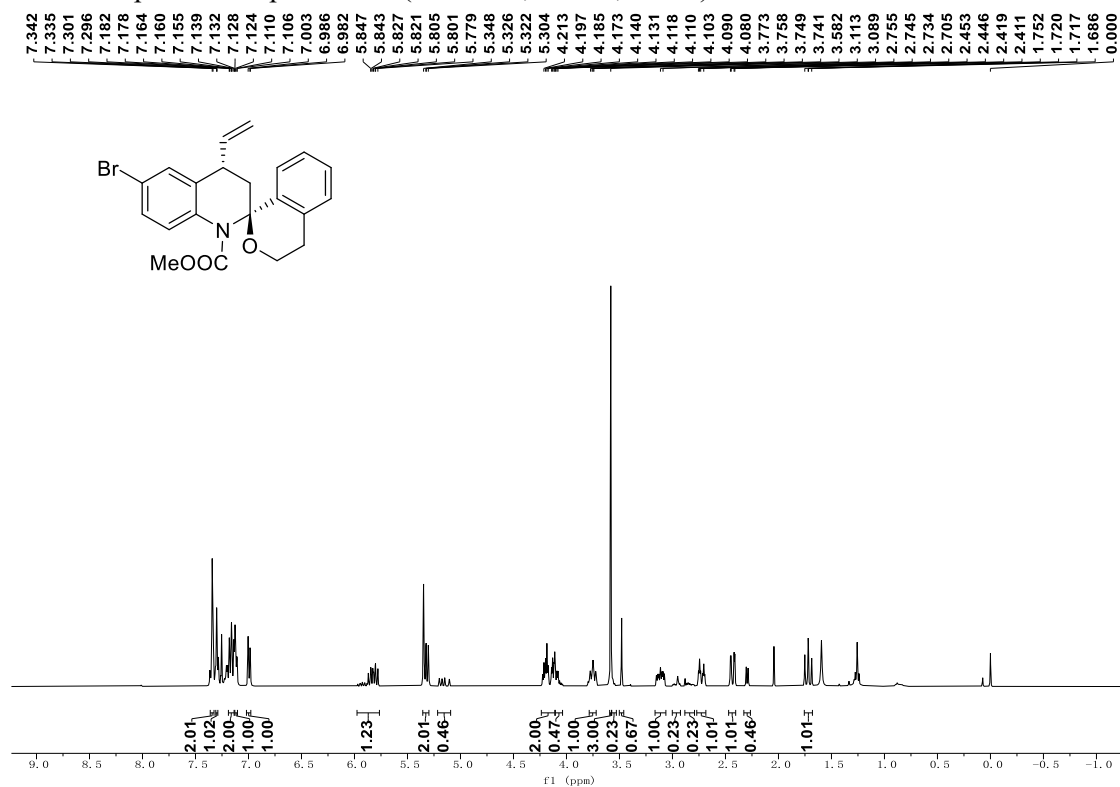

<sup>13</sup>C NMR spectrum of product **5e** (100 MHz, CDCl<sub>3</sub>, 5:1 dr)

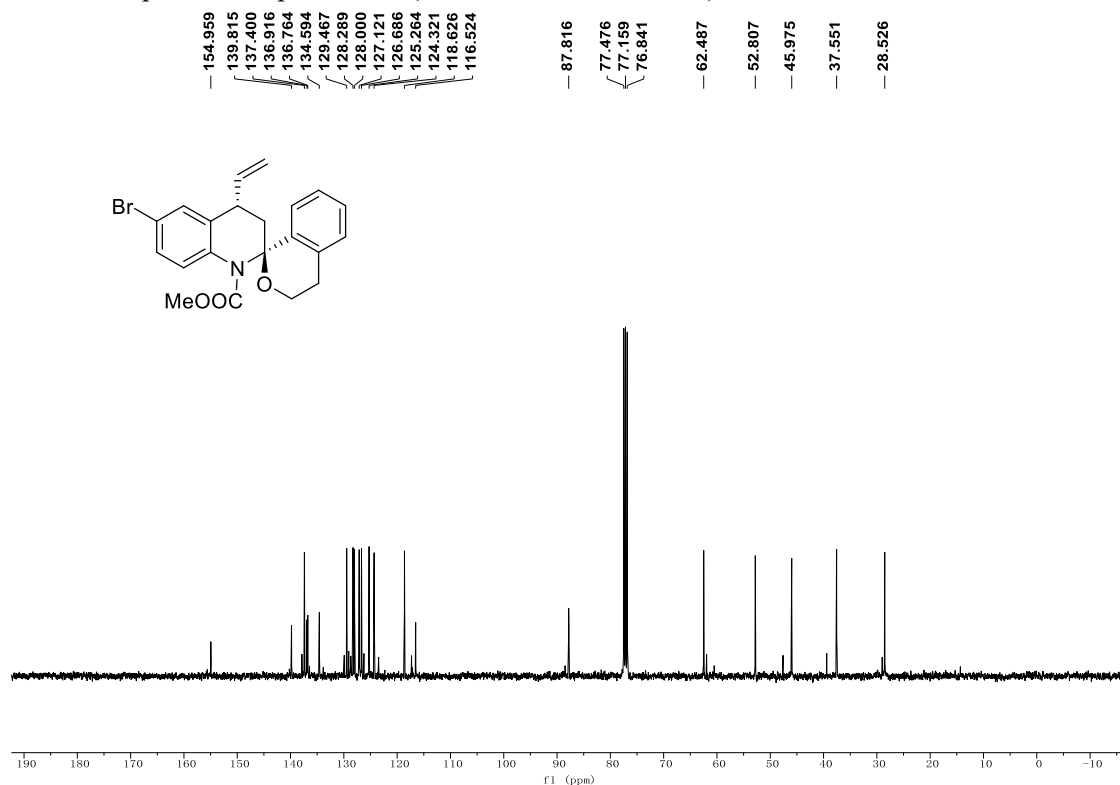

<sup>1</sup>H NMR spectrum of product **5f** (400 MHz, CDCl<sub>3</sub>, 5:1 dr)

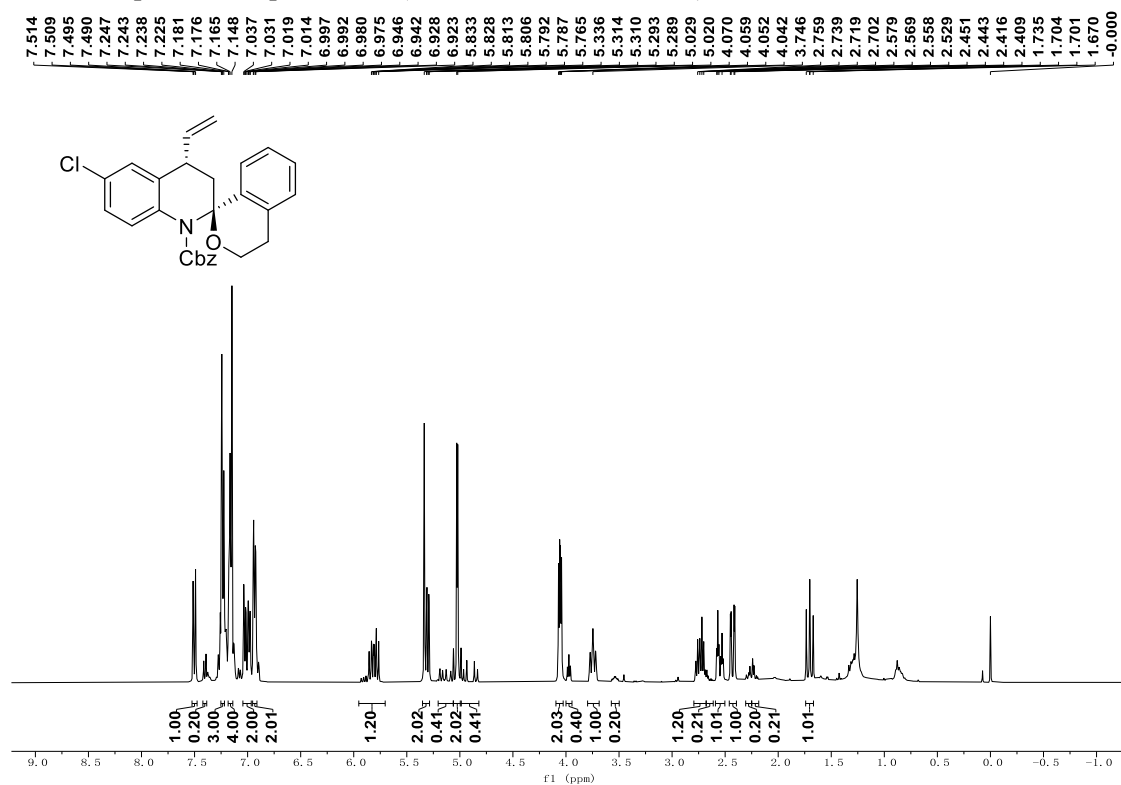

<sup>13</sup>C NMR spectrum of product **5f** (100 MHz, CDCl<sub>3</sub>, 5:1 dr)

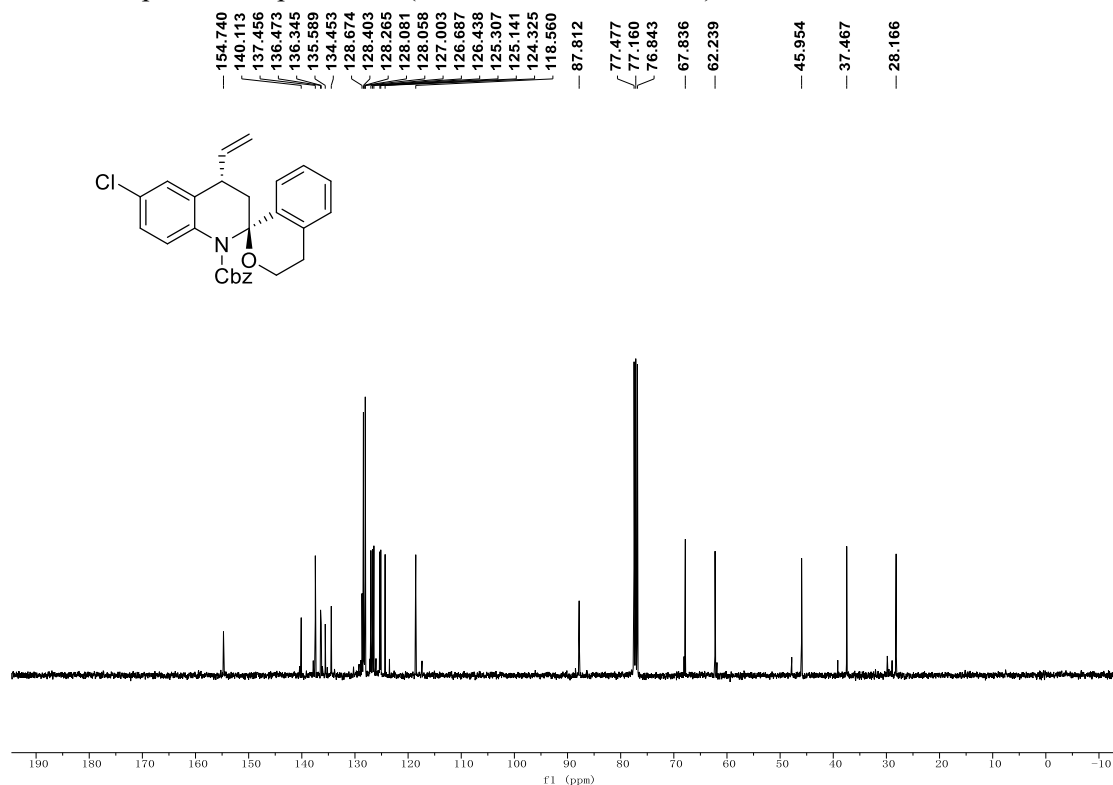

$^1\text{H}$  NMR spectrum of product **5g** (400 MHz,  $\text{CDCl}_3$ , 5:1 dr)

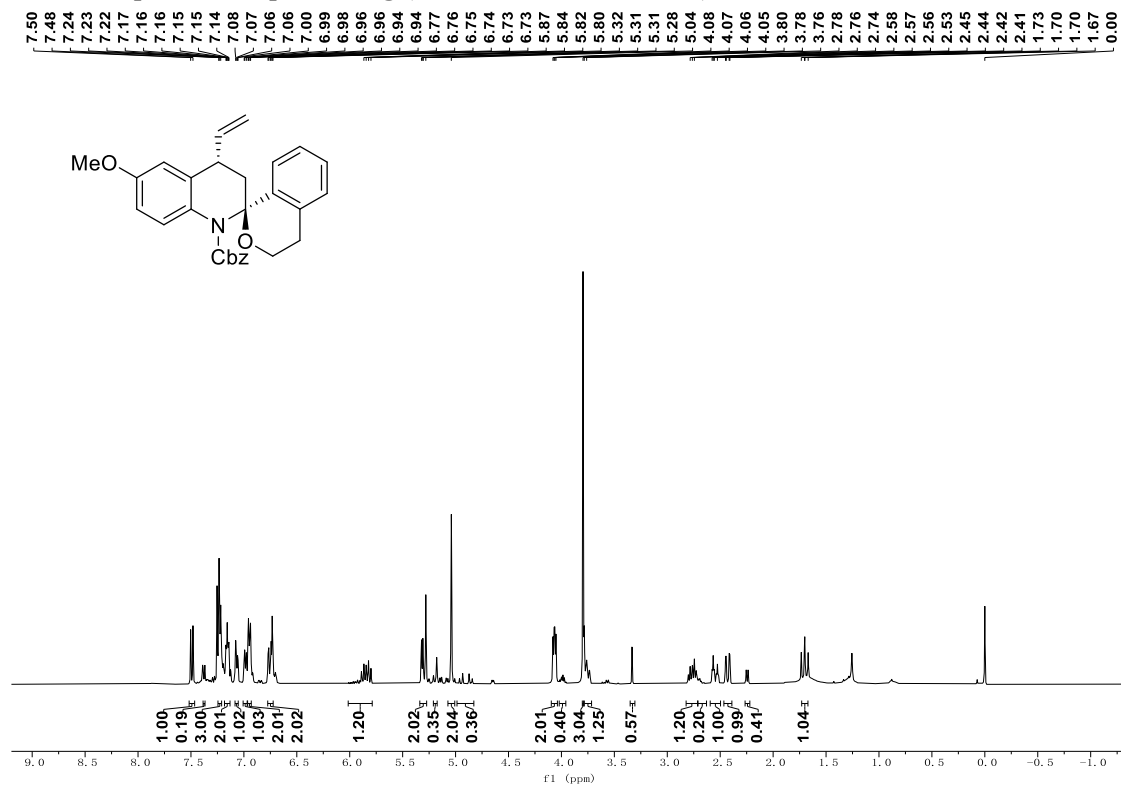

$^{13}\text{C}$  NMR spectrum of product **5g** (100 MHz,  $\text{CDCl}_3$ , 5:1 dr)

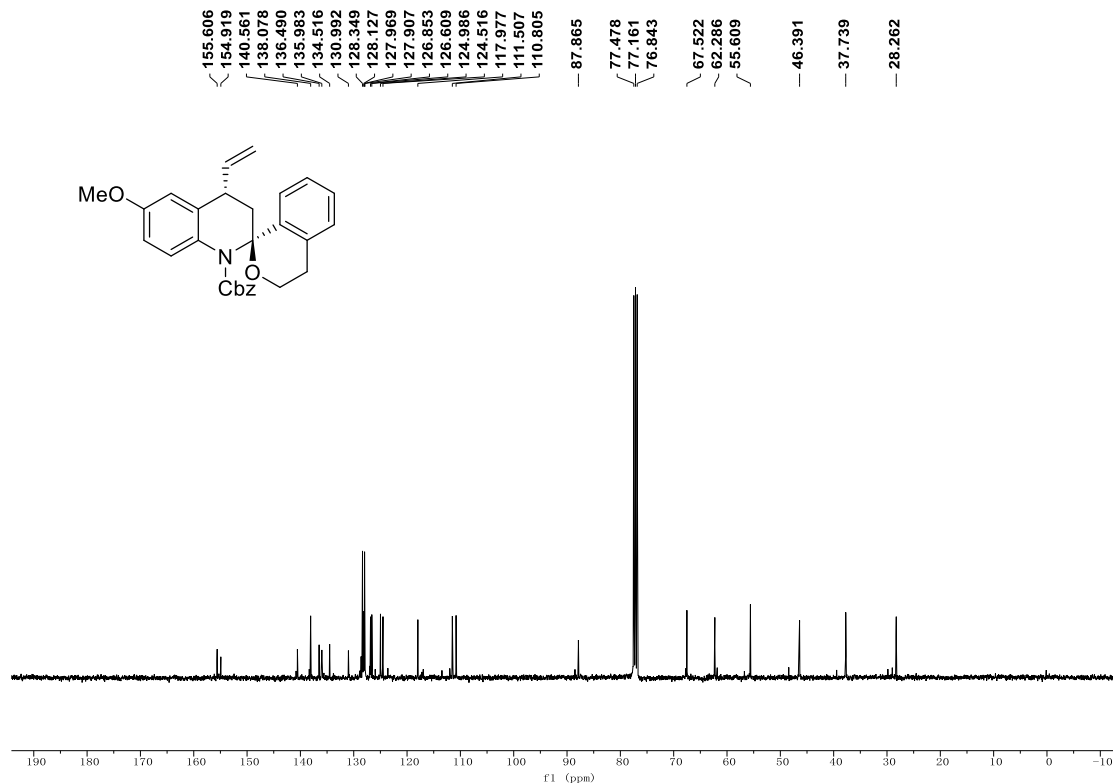

<sup>1</sup>H NMR spectrum of product **5h** (400 MHz, CDCl<sub>3</sub>, 10:1 dr)

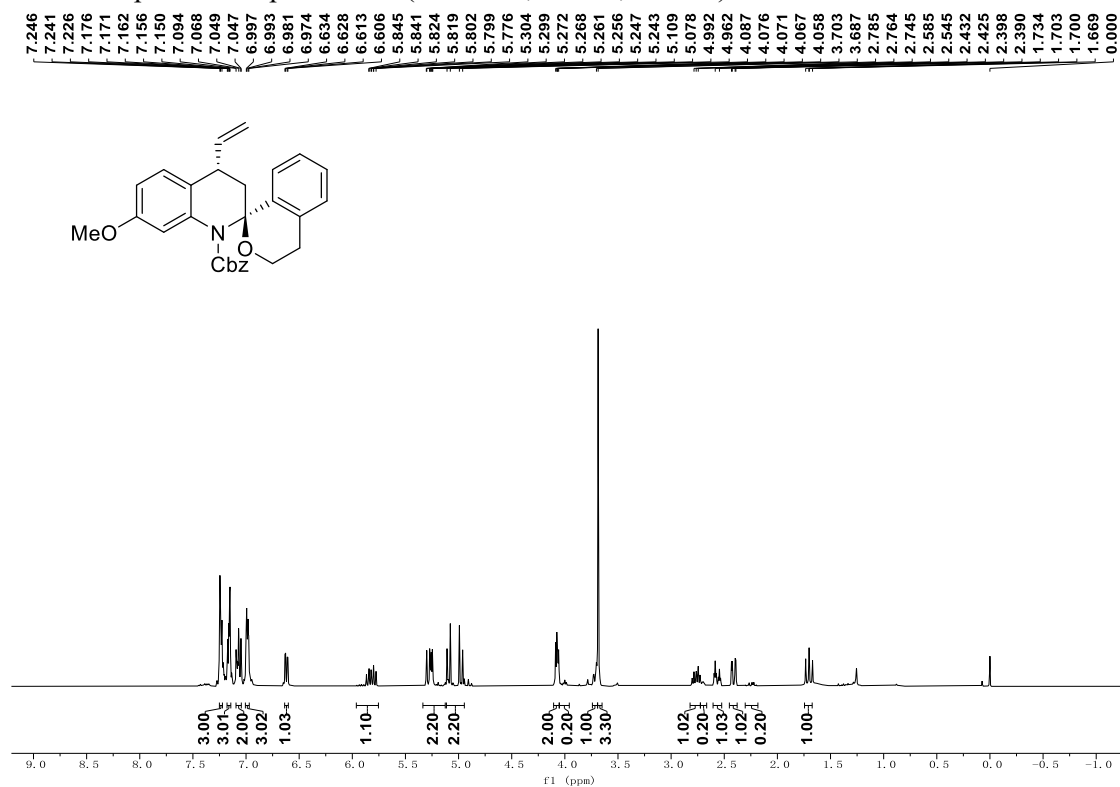

<sup>13</sup>C NMR spectrum of product **5h** (100 MHz, CDCl<sub>3</sub>, 10:1 dr)

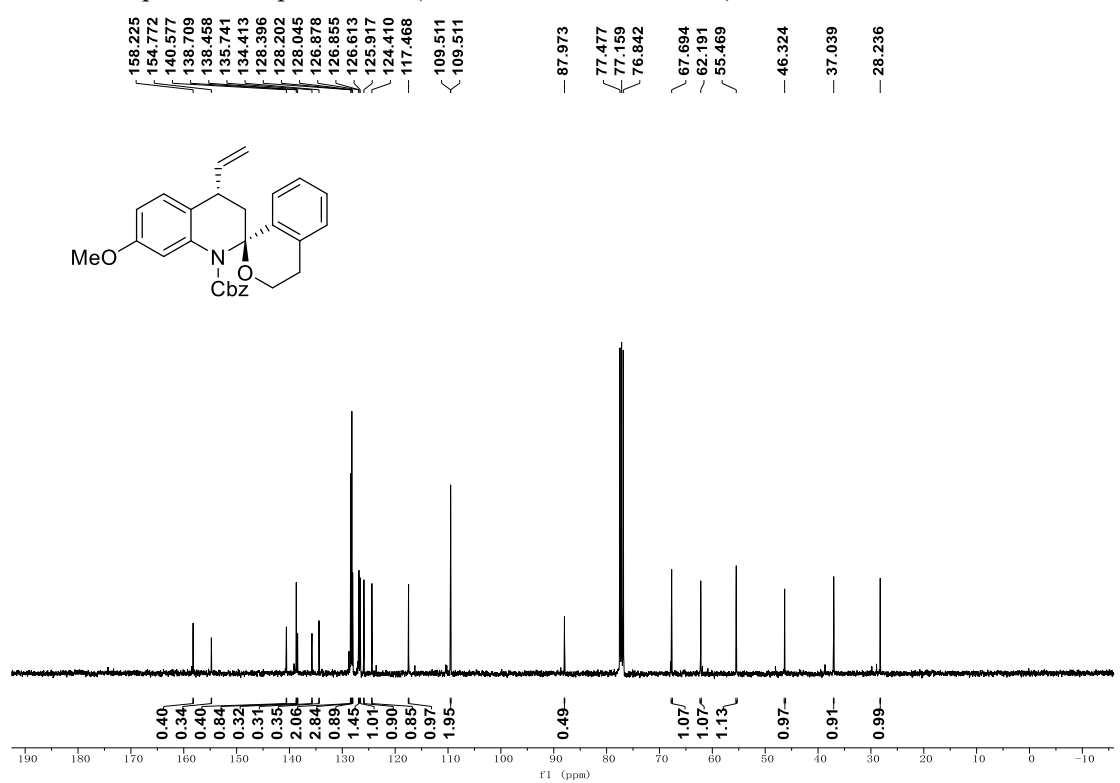

<sup>1</sup>H NMR spectrum of product **5i** (400 MHz, CDCl<sub>3</sub>, 5:1 dr)

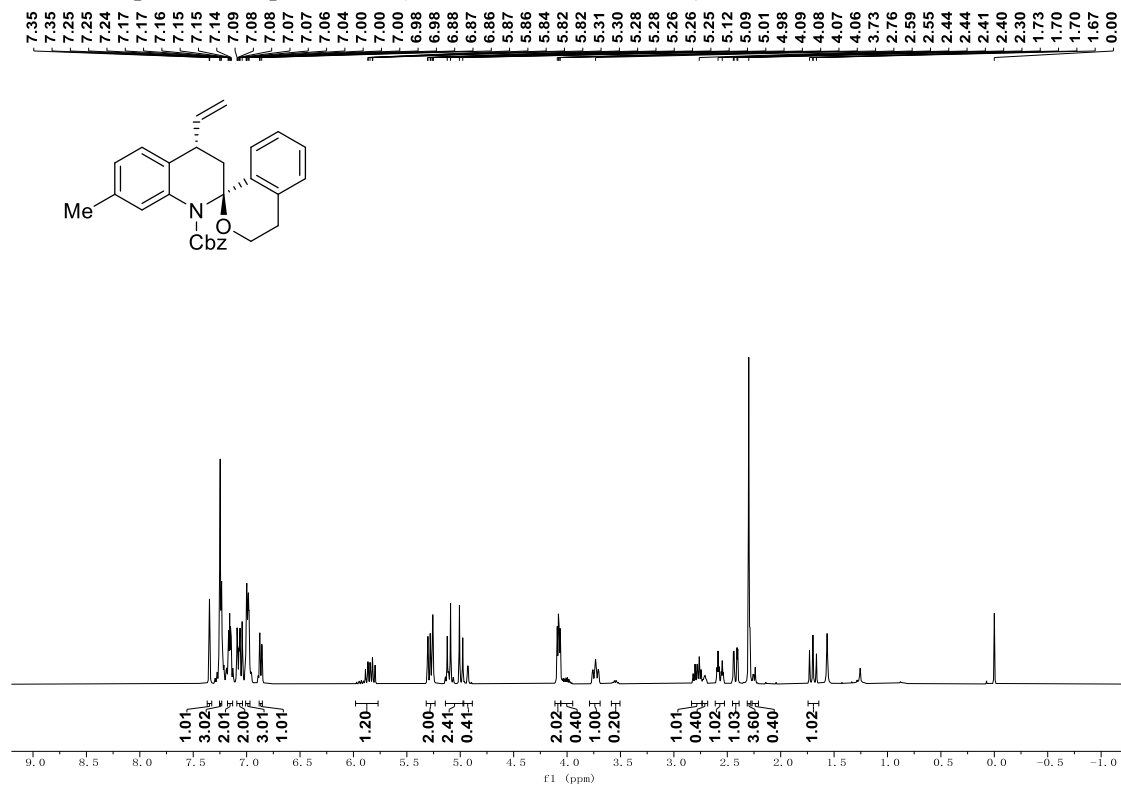

<sup>13</sup>C NMR spectrum of product **5i** (100 MHz, CDCl<sub>3</sub>, 5:1 dr)

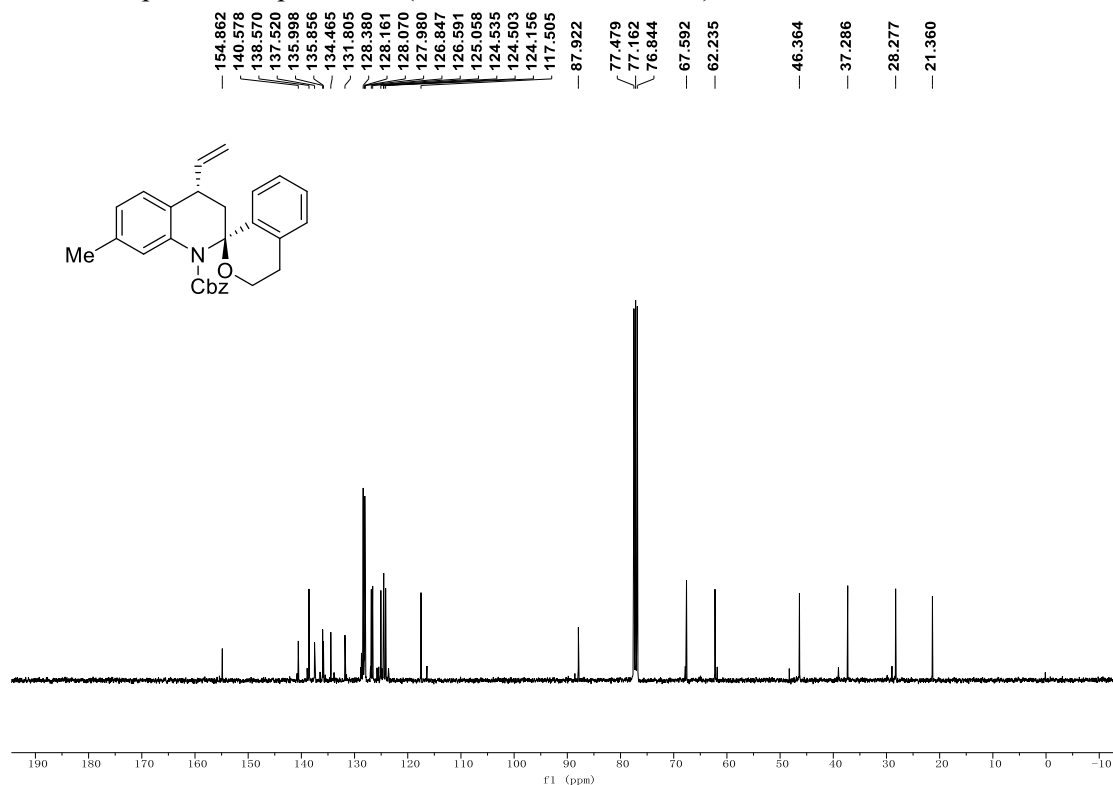

<sup>1</sup>H NMR spectrum of product **5j** (400 MHz, CDCl<sub>3</sub>, 6:1 dr)

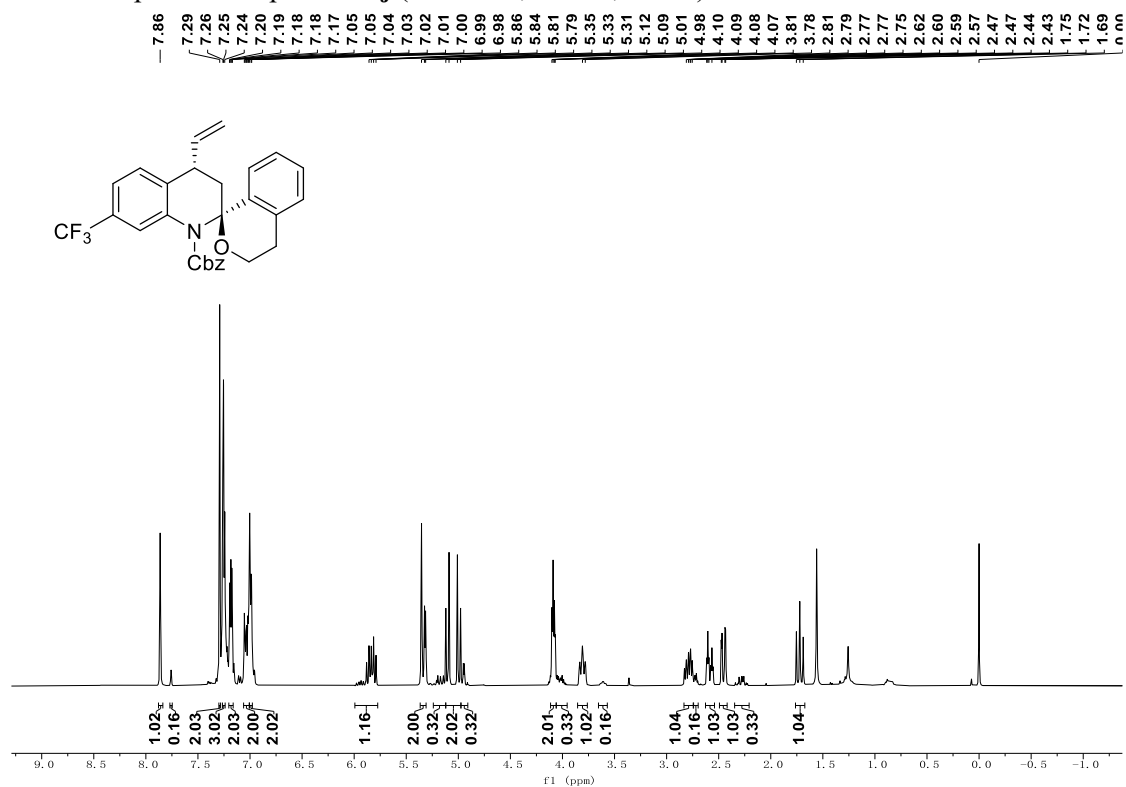

<sup>13</sup>C NMR spectrum of product **5j** (100 MHz, CDCl<sub>3</sub>, 6:1 dr)

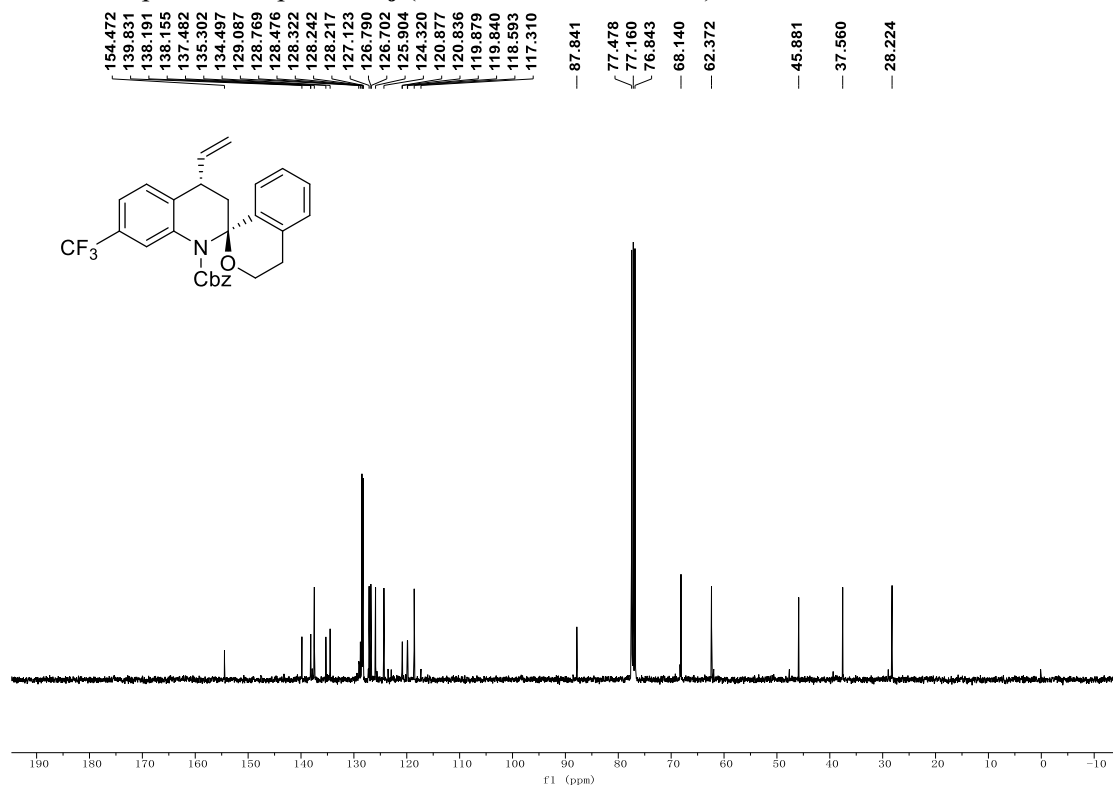

$^{19}\text{F}$  NMR spectrum of product **5j** (376 MHz,  $\text{CDCl}_3$ , 6:1 dr)

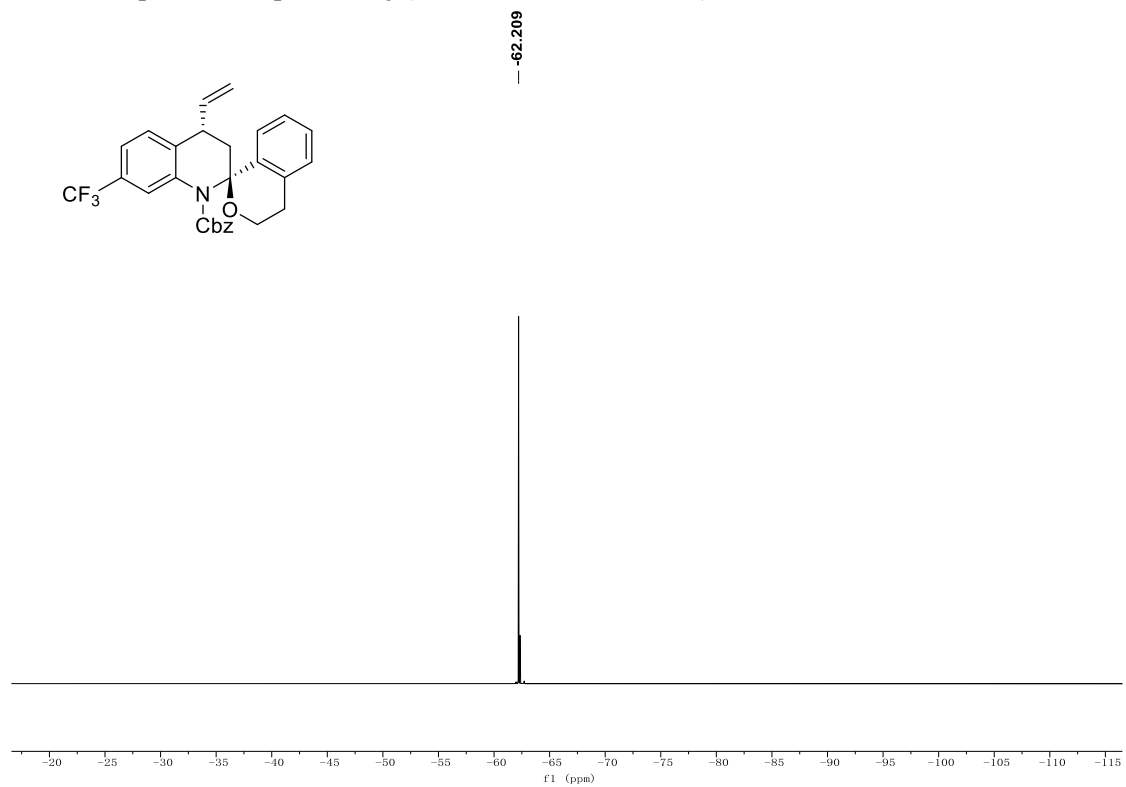



<sup>1</sup>H NMR spectrum of product **6** (400 MHz, CDCl<sub>3</sub>)

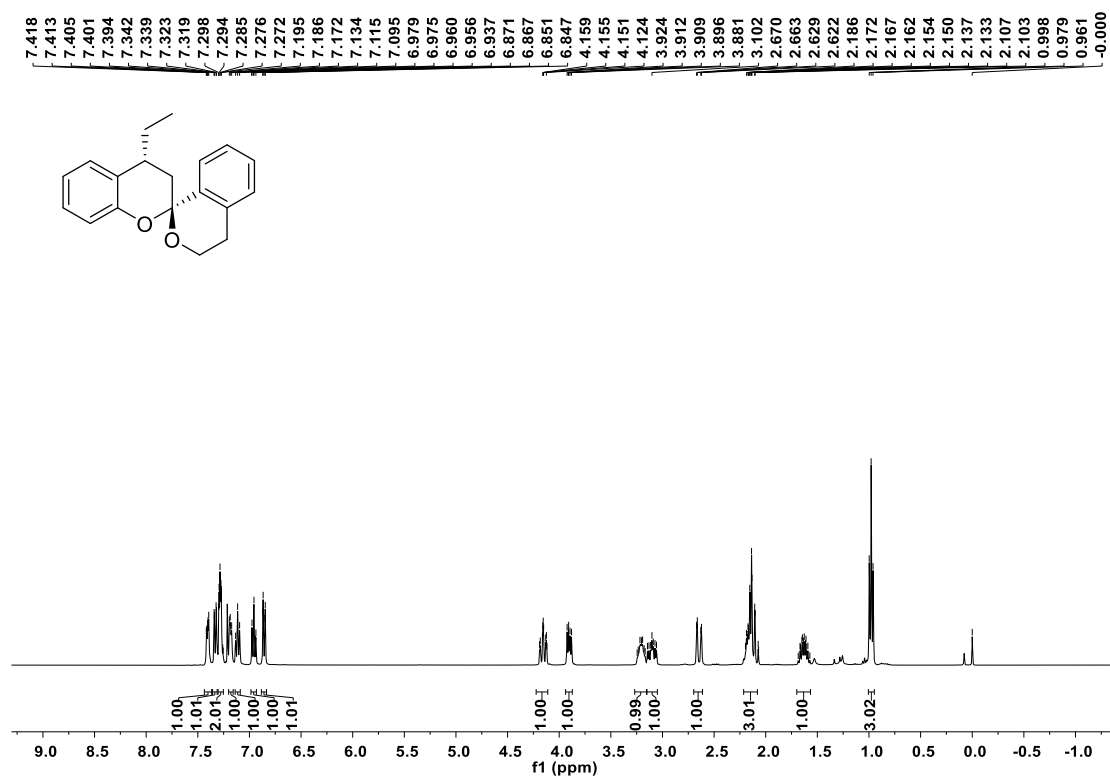

<sup>13</sup>C NMR spectrum of product **6** (100 MHz, CDCl<sub>3</sub>)

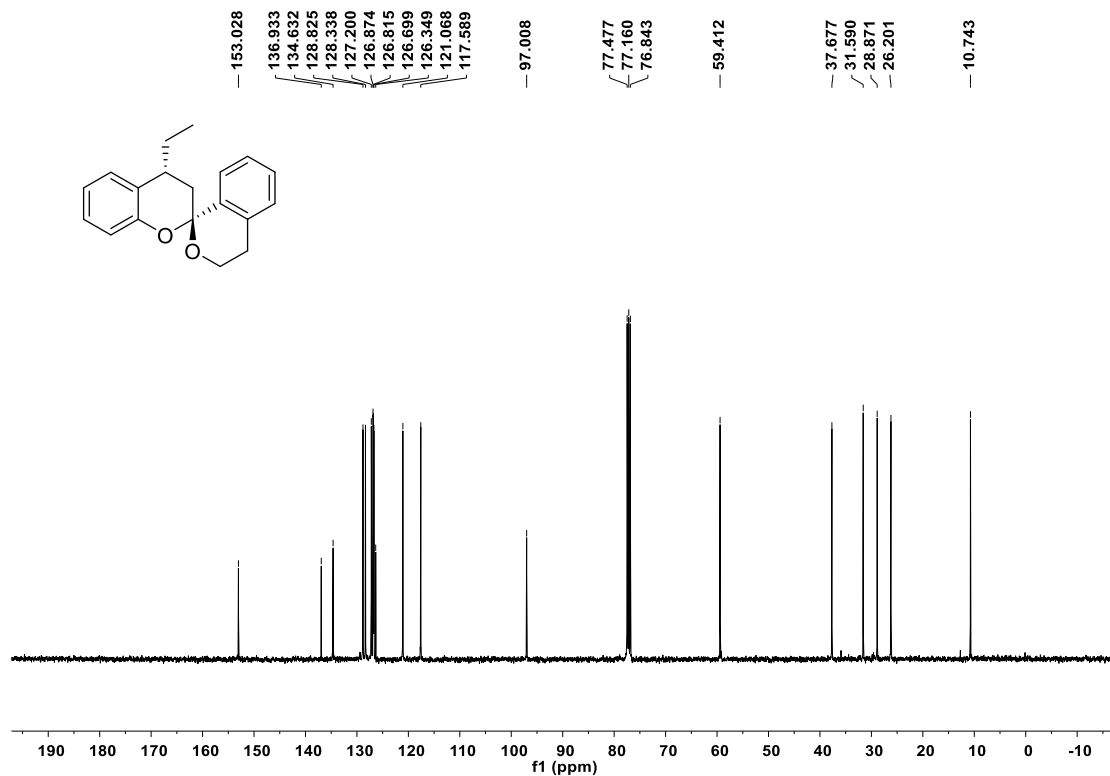

<sup>1</sup>H NMR spectrum of product 7 (400 MHz, CDCl<sub>3</sub>)

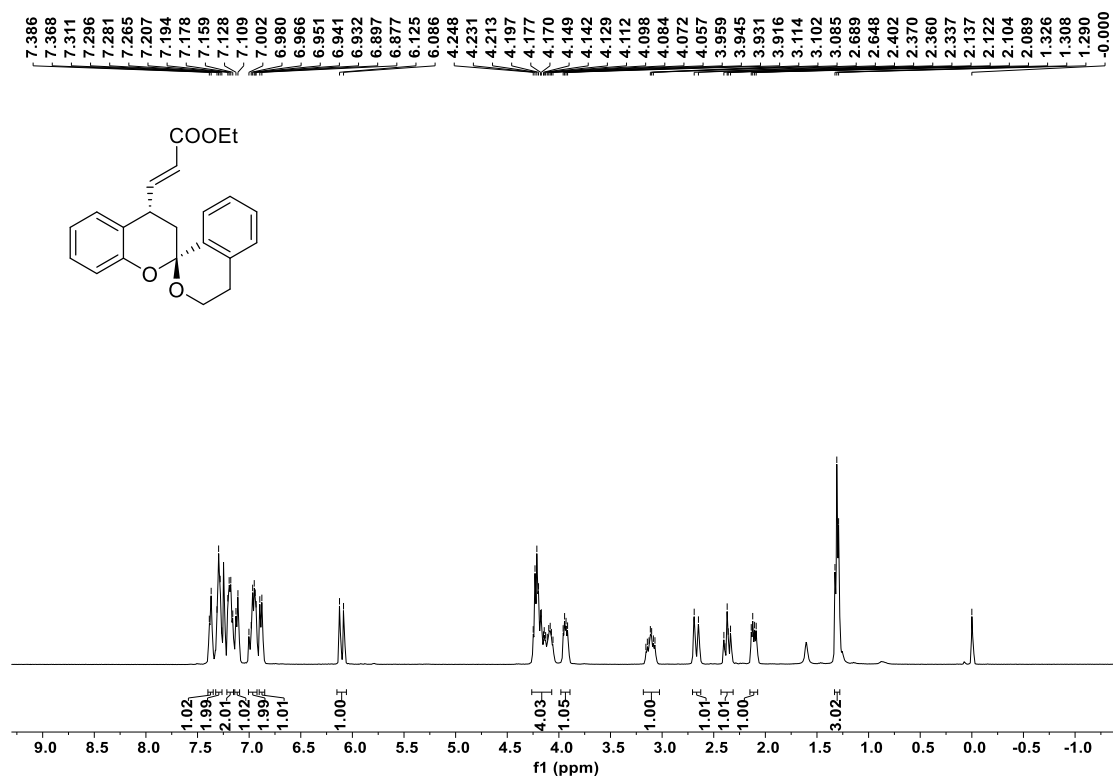

<sup>13</sup>C NMR spectrum of product 7 (100 MHz, CDCl<sub>3</sub>)

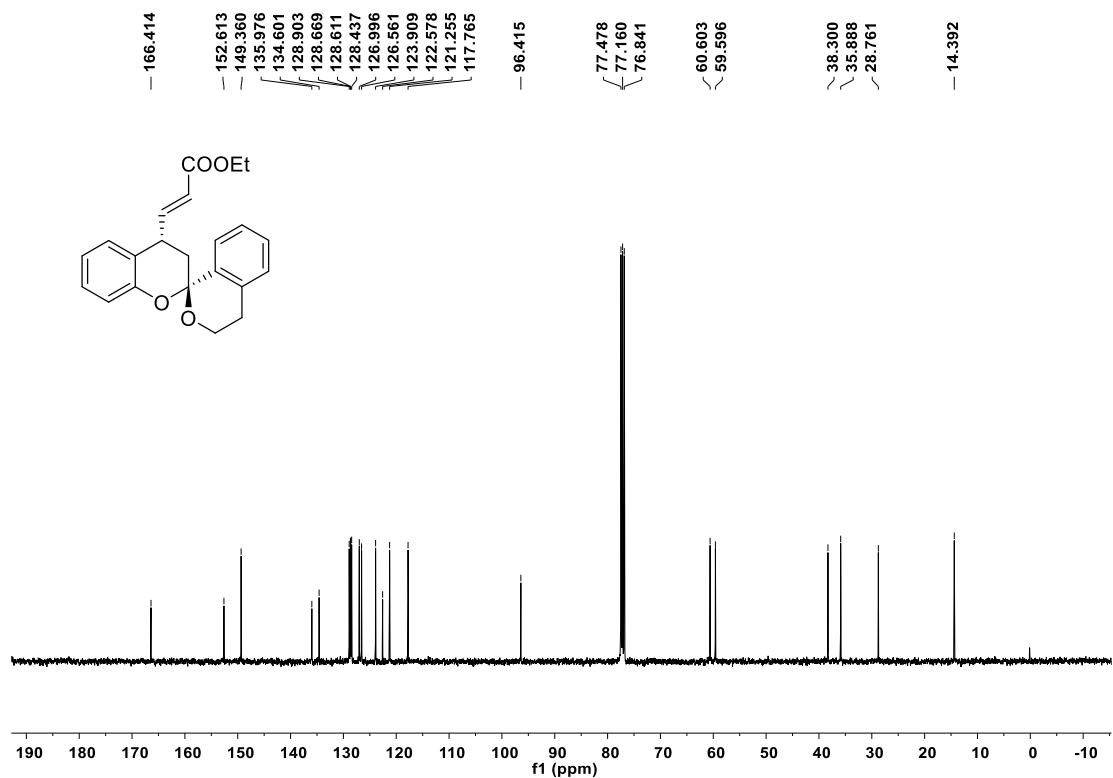

<sup>1</sup>H NMR spectrum of product **8** (400 MHz, CDCl<sub>3</sub>)

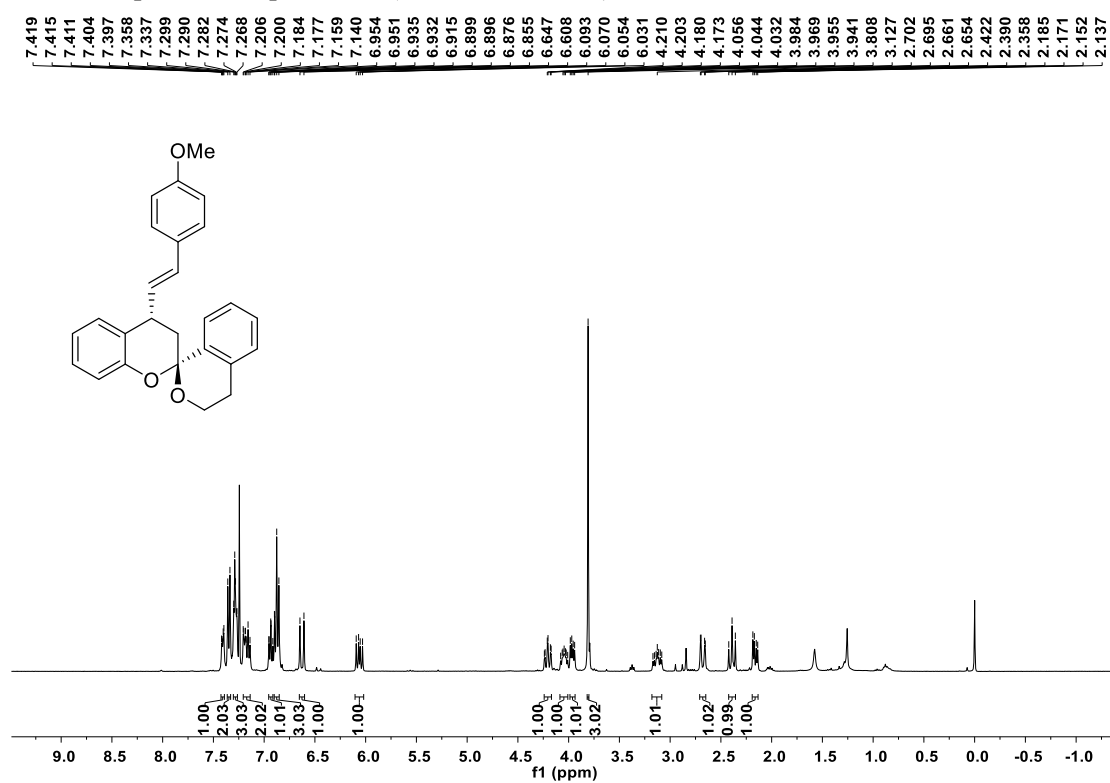

<sup>13</sup>C NMR spectrum of product **8** (100 MHz, CDCl<sub>3</sub>)

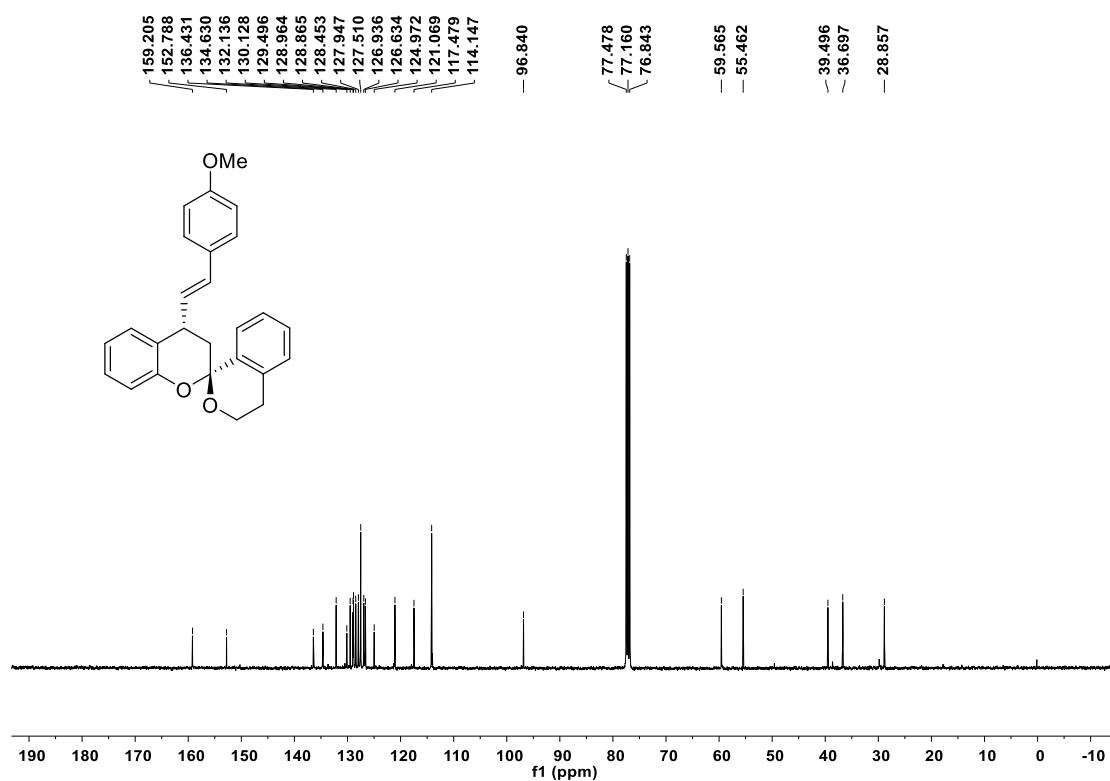

## 12. HPLC chromatograms

HPLC chromatogram of compound **3a** (99% ee, 12:1 dr)

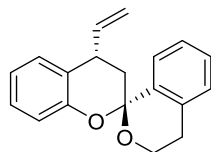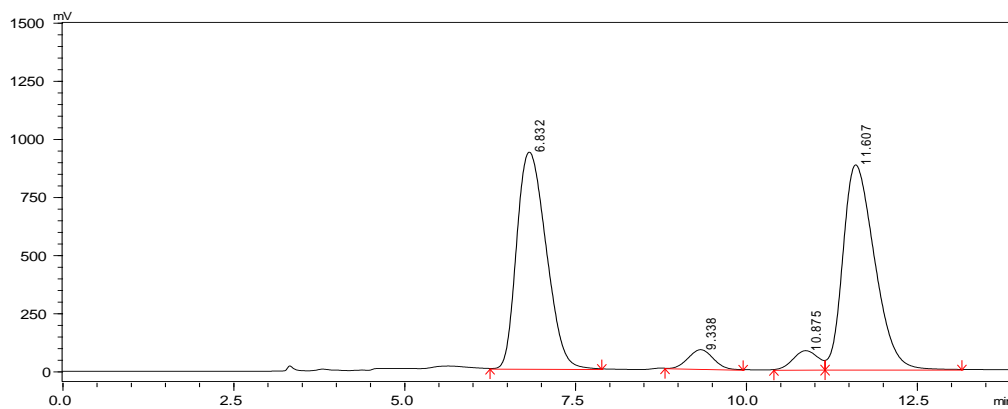

| #     | Ret Time (min) | Height ( $\mu\text{V}$ ) | Area ( $\mu\text{V}\cdot\text{sec}$ ) | Area (%) |
|-------|----------------|--------------------------|---------------------------------------|----------|
| 1     | 6.832          | 931366                   | 27819100                              | 46.220   |
| 2     | 9.338          | 82543                    | 2061916                               | 3.426    |
| 3     | 10.875         | 81411                    | 2041438                               | 3.392    |
| 4     | 11.607         | 880597                   | 28266633                              | 6.963    |
| total |                | 1975918                  | 60189088                              | 100.000  |

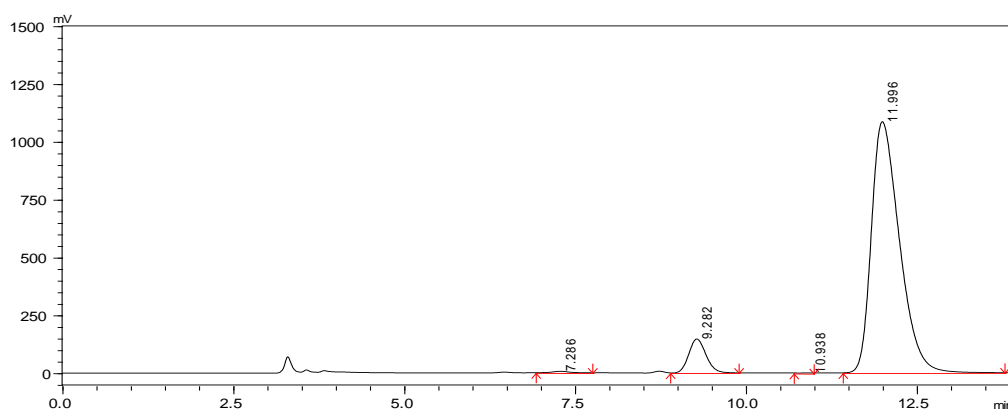

| #     | Ret Time (min) | Height ( $\mu\text{V}$ ) | Area ( $\mu\text{V}\cdot\text{sec}$ ) | Area (%) |
|-------|----------------|--------------------------|---------------------------------------|----------|
| 1     | 7.286          | 6280                     | 107382                                | 0.319    |
| 2     | 9.282          | 146644                   | 2563647                               | 7.614    |
| 3     | 10.938         | 2252                     | 29962                                 | 0.089    |
| 4     | 11.986         | 1085357                  | 30970419                              | 91.978   |
| total |                | 1240533                  | 33671409                              | 100.000  |

HPLC chromatogram of compound **3b** (98% / 93% ee, 2:1 dr)

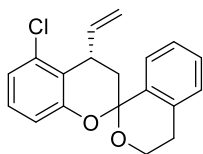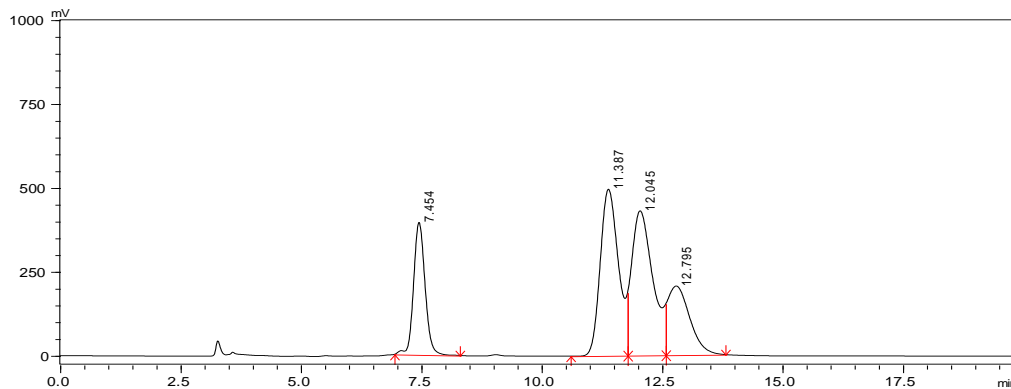

| #     | Ret Time (min) | Height ( $\mu\text{V}$ ) | Area ( $\mu\text{V}\cdot\text{sec}$ ) | Area (%) |
|-------|----------------|--------------------------|---------------------------------------|----------|
| 1     | 7.454          | 394191                   | 6553538                               | 16.610   |
| 2     | 11.387         | 496288                   | 13189999                              | 33.430   |
| 3     | 12.045         | 431019                   | 13236572                              | 33.548   |
| 4     | 12.795         | 205863                   | 6475698                               | 16.413   |
| total |                | 1527360                  | 39455807                              | 100.000  |

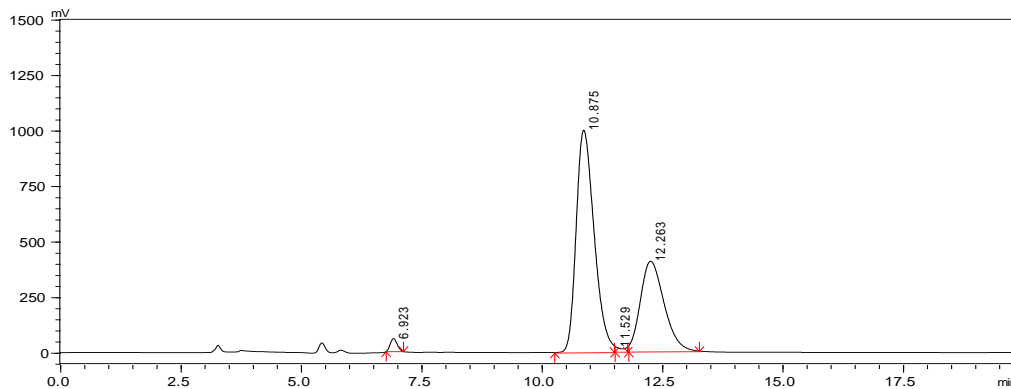

| #     | Ret Time (min) | Height ( $\mu\text{V}$ ) | Area ( $\mu\text{V}\cdot\text{sec}$ ) | Area (%) |
|-------|----------------|--------------------------|---------------------------------------|----------|
| 1     | 6.923          | 56019                    | 538325                                | 1.329    |
| 2     | 10.875         | 1000829                  | 25901553                              | 63.956   |
| 3     | 11.529         | 22966                    | 235116                                | 0.581    |
| 4     | 12.263         | 405963                   | 13823816                              | 34.134   |
| total |                | 1485777                  | 40498810                              | 100.000  |

HPLC chromatogram of compound **3c** (99% / 99% ee, 1.6:1 dr)

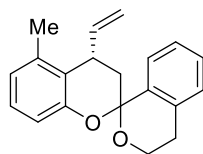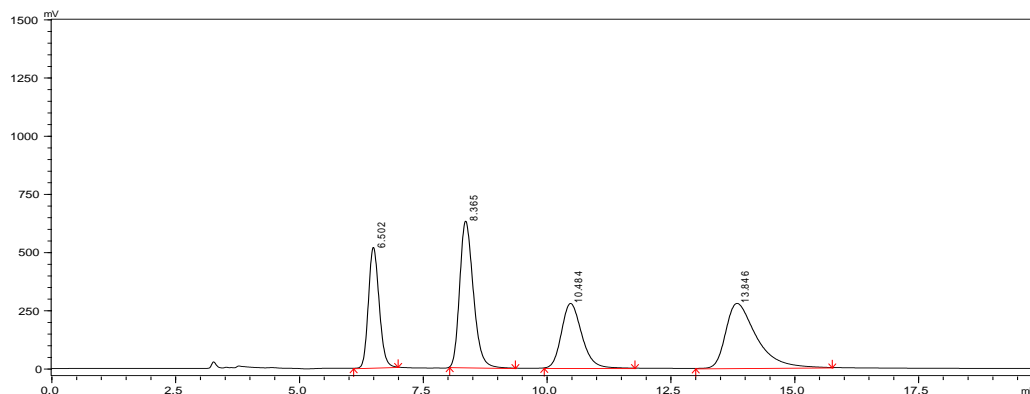

| #     | Ret Time (min) | Height (μV) | Area (μV.sec) | Area (%) |
|-------|----------------|-------------|---------------|----------|
| 1     | 6.502          | 516743      | 7767034       | 19.665   |
| 2     | 8.365          | 628308      | 11989617      | 30.356   |
| 3     | 10.484         | 277365      | 7849132       | 19.873   |
| 4     | 13.846         | 277948      | 11891452      | 30.107   |
| total |                | 1700363     | 39497235      | 100.000  |

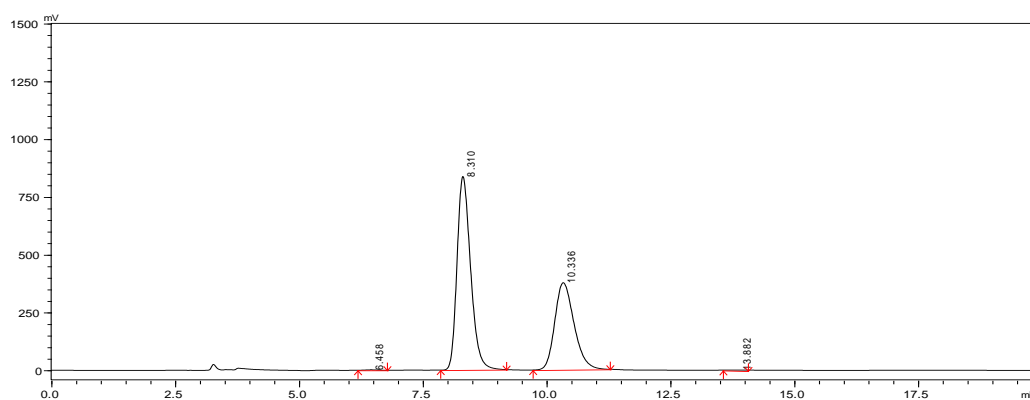

| #     | Ret Time (min) | Height (μV) | Area (μV.sec) | Area (%) |
|-------|----------------|-------------|---------------|----------|
| 1     | 6.458          | 1797        | 28257         | 0.108    |
| 2     | 8.310          | 836452      | 15941307      | 60.822   |
| 3     | 10.336         | 376303      | 10163075      | 38.776   |
| 4     | 13.882         | 2991        | 77052         | 0.294    |
| total |                | 1217544     | 26209690      | 100.000  |

HPLC chromatogram of compound **3d** (99% ee)

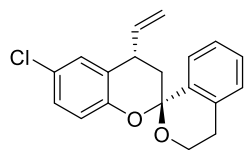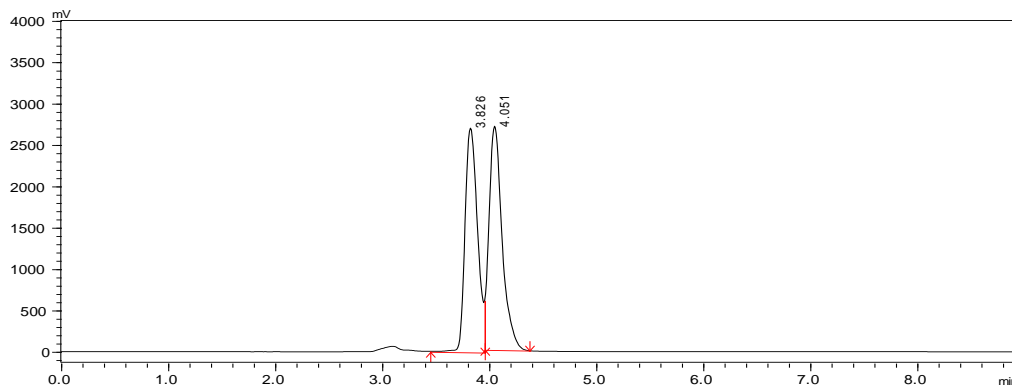

| #     | Ret Time (min) | Height ( $\mu\text{V}$ ) | Area ( $\mu\text{V}\cdot\text{sec}$ ) | Area (%) |
|-------|----------------|--------------------------|---------------------------------------|----------|
| 1     | 3.826          | 2709788                  | 22083925                              | 49.060   |
| 2     | 4.051          | 2702999                  | 22930054                              | 50.940   |
| total |                | 5412786                  | 45013978                              | 100.000  |

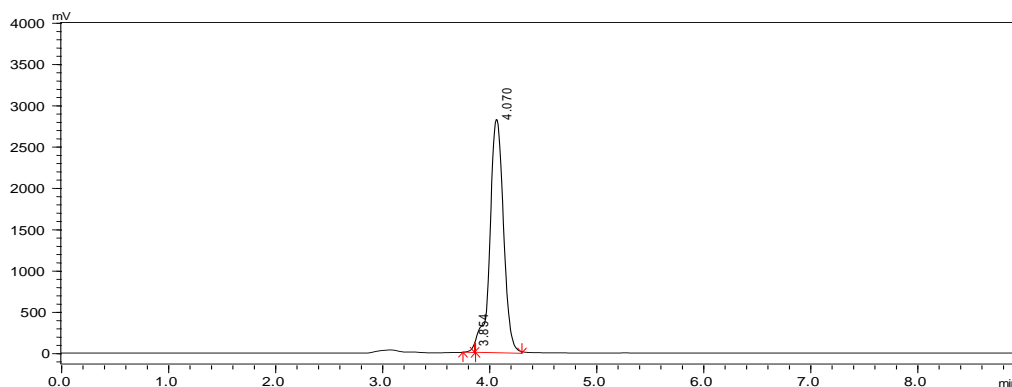

| #     | Ret Time (min) | Height ( $\mu\text{V}$ ) | Area ( $\mu\text{V}\cdot\text{sec}$ ) | Area (%) |
|-------|----------------|--------------------------|---------------------------------------|----------|
| 1     | 3.854          | 58843                    | 103610                                | 0.414    |
| 2     | 4.070          | 2815653                  | 24908707                              | 99.586   |
| total |                | 2874496                  | 25012317                              | 100.000  |

HPLC chromatogram of compound **3e** (99% ee)

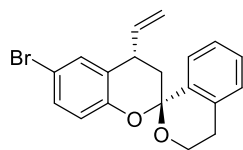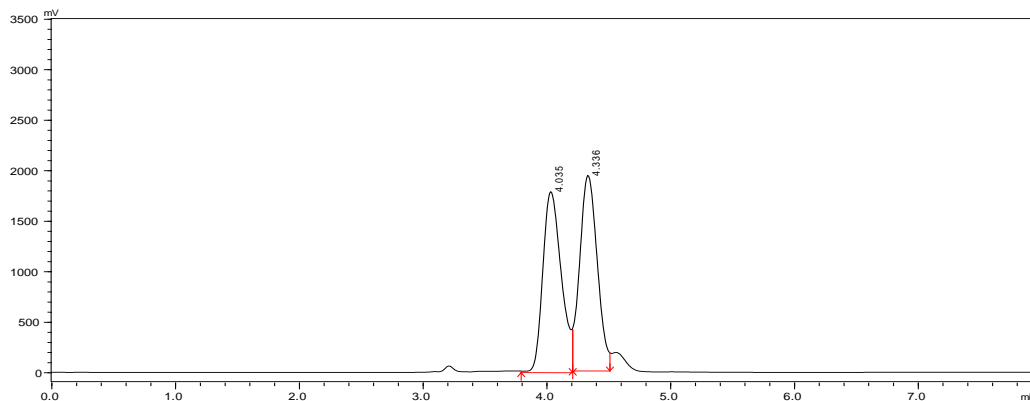

| #     | Ret Time (min) | Height (μV) | Area (μV.sec) | Area (%) |
|-------|----------------|-------------|---------------|----------|
| 1     | 4.035          | 1786723     | 18581296      | 49.479   |
| 2     | 4.336          | 1930701     | 18972907      | 50.521   |
| total |                | 3717424     | 37554203      | 100.000  |

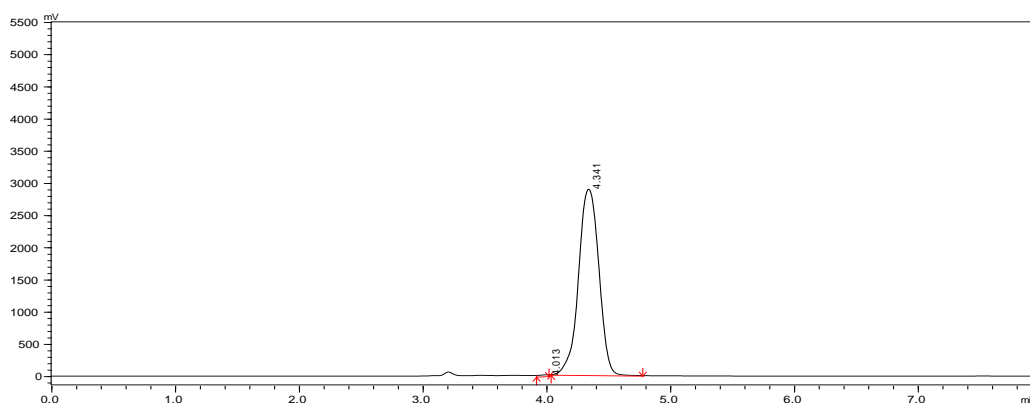

| #     | Ret Time (min) | Height (μV) | Area (μV.sec) | Area (%) |
|-------|----------------|-------------|---------------|----------|
| 1     | 4.013          | 22062       | 125224        | 0.379    |
| 2     | 4.341          | 2887124     | 32897250      | 99.621   |
| total |                | 2909186     | 33022474      | 100.000  |



HPLC chromatogram of compound **3f** (97% ee, 14:1 dr)

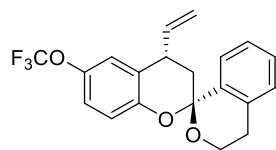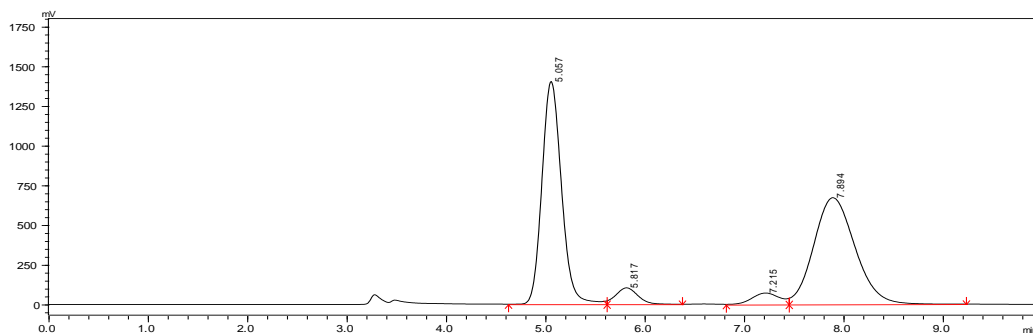

| #     | Ret Time (min) | Height (μV) | Area (μV.sec) | Area (%) |
|-------|----------------|-------------|---------------|----------|
| 1     | 5.057          | 1402619     | 19173991      | 46.040   |
| 2     | 5.817          | 102926      | 1562585       | 3.752    |
| 3     | 7.215          | 72524       | 1429127       | 3.432    |
| 4     | 7.894          | 672596      | 19480480      | 46.776   |
| total |                | 2250665     | 41646183      | 100.000  |

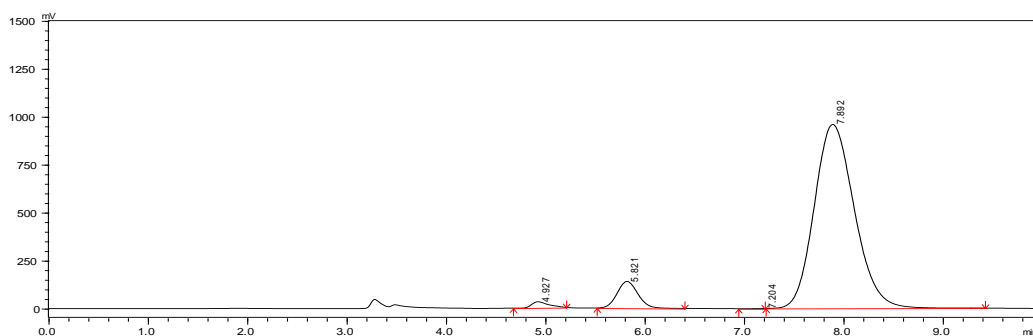

| #     | Ret Time (min) | Height (μV) | Area (μV.sec) | Area (%) |
|-------|----------------|-------------|---------------|----------|
| 1     | 4.927          | 31191       | 357202        | 1.220    |
| 2     | 5.821          | 138893      | 2007193       | 6.857    |
| 3     | 7.204          | 1619        | 9283          | 0.032    |
| 4     | 7.892          | 958649      | 26900132      | 91.891   |
| total |                | 1130352     | 29273810      | 100.000  |

HPLC chromatogram of compound **3g** (96% ee, 13:1 dr)

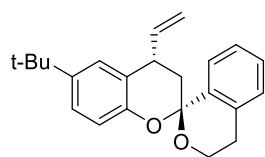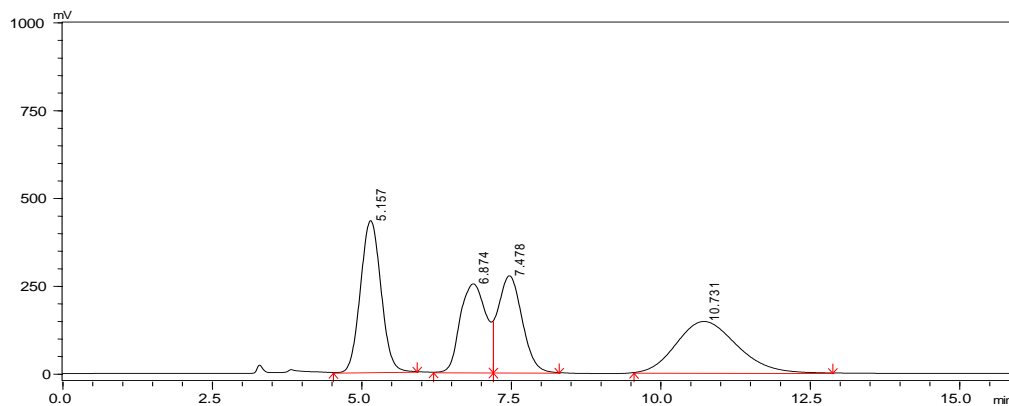

| #     | Ret Time (min) | Height (μV) | Area (μV.sec) | Area (%) |
|-------|----------------|-------------|---------------|----------|
| 1     | 5.157          | 431295      | 10271925      | 28.710   |
| 2     | 6.874          | 251832      | 7596124       | 21.231   |
| 3     | 7.478          | 275139      | 7668268       | 21.433   |
| 4     | 10.731         | 145953      | 10242314      | 28.627   |
| total |                | 1104218     | 35778630      | 100.000  |

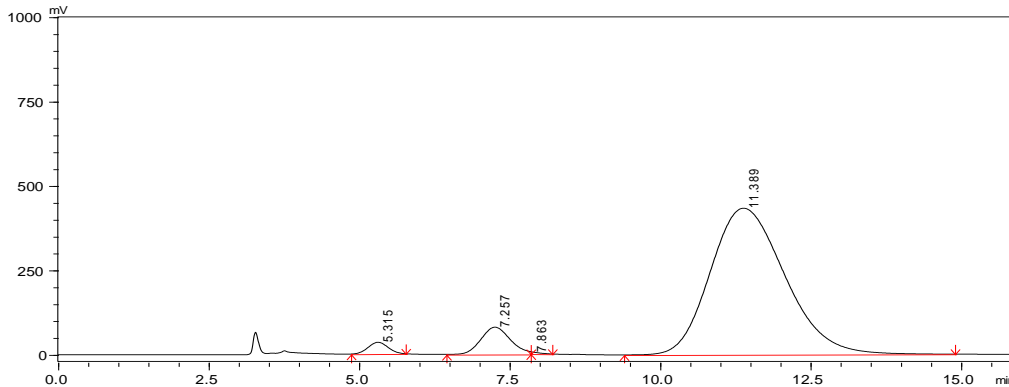

| #     | Ret Time (min) | Height (μV) | Area (μV.sec) | Area (%) |
|-------|----------------|-------------|---------------|----------|
| 1     | 5.315          | 34500       | 789840        | 1.928    |
| 2     | 7.257          | 80939       | 2757384       | 6.731    |
| 3     | 7.863          | 6505        | 58255         | 0.142    |
| 4     | 11.389         | 433617      | 37359071      | 91.199   |
| total |                | 555560      | 40964550      | 100.000  |

HPLC chromatogram of compound **3h** (98% ee, 14:1 dr)

[the dr values from HPLC analysis and NMR analysis were inconsistent, so, we determined the dr value by NMR analysis]

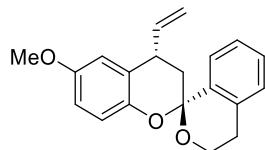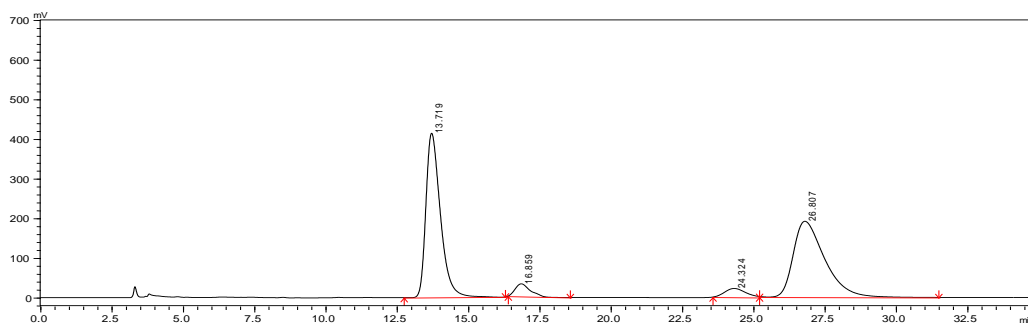

| #     | Ret Time (min) | Height ( $\mu\text{V}$ ) | Area ( $\mu\text{V}\cdot\text{sec}$ ) | Area (%) |
|-------|----------------|--------------------------|---------------------------------------|----------|
| 1     | 13.719         | 414329                   | 14641984                              | 46.437   |
| 2     | 16.859         | 31887                    | 1139320                               | 3.613    |
| 3     | 24.324         | 21979                    | 1104083                               | 3.502    |
| 4     | 26.807         | 191387                   | 14645257                              | 46.448   |
| total |                | 659582                   | 31530645                              | 100.000  |

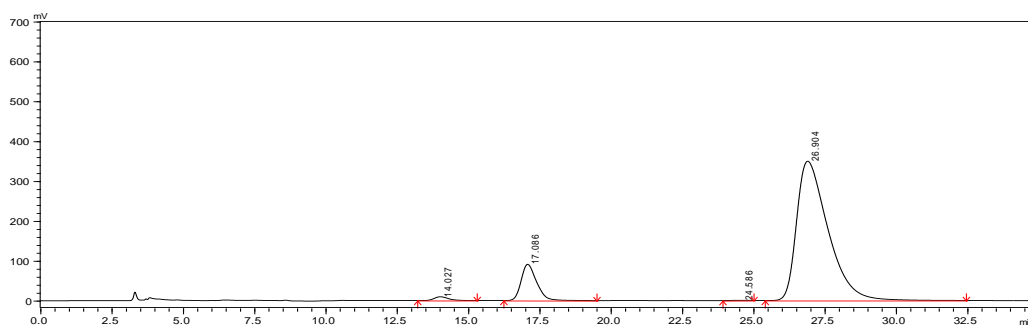

| #     | Ret Time (min) | Height ( $\mu\text{V}$ ) | Area ( $\mu\text{V}\cdot\text{sec}$ ) | Area (%) |
|-------|----------------|--------------------------|---------------------------------------|----------|
| 1     | 14.027         | 9521                     | 332788                                | 1.092    |
| 2     | 17.086         | 90992                    | 3419846                               | 11.219   |
| 3     | 24.586         | 522                      | 19897                                 | 0.065    |
| 4     | 26.904         | 349377                   | 26709673                              | 87.624   |
| total |                | 450412                   | 30482203                              | 100.000  |

HPLC chromatogram of compound **3i** (93% ee)

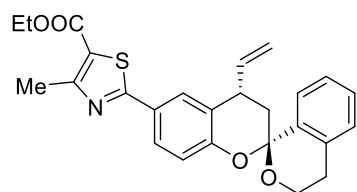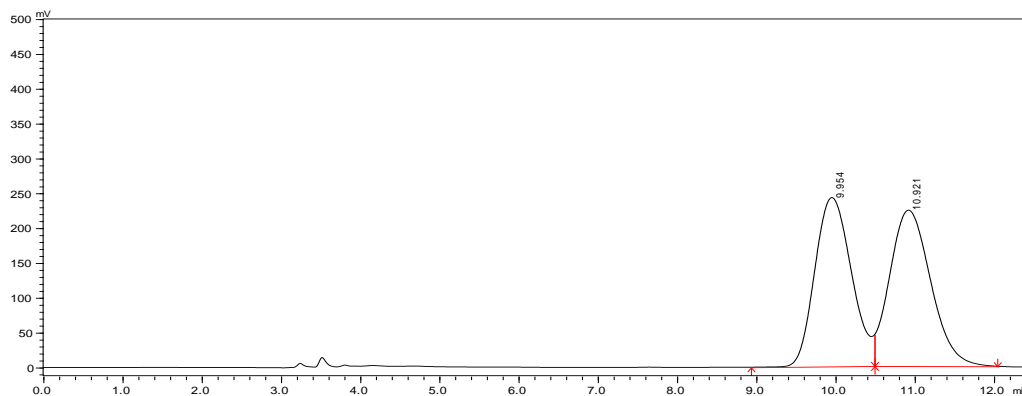

| #     | Ret Time (min) | Height (μV) | Area (μV.sec) | Area (%) |
|-------|----------------|-------------|---------------|----------|
| 1     | 9.729          | 34281       | 926466        | 3.508    |
| 2     | 10.635         | 673831      | 25485145      | 96.492   |
| total |                | 708112      | 26411611      | 100.000  |

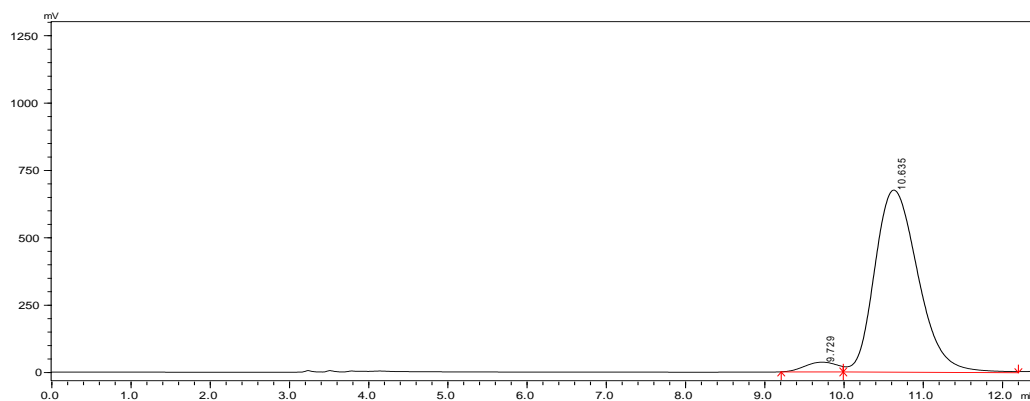

| #     | Ret Time (min) | Height (μV) | Area (μV.sec) | Area (%) |
|-------|----------------|-------------|---------------|----------|
| 1     | 9.729          | 34281       | 926466        | 3.508    |
| 2     | 10.635         | 673831      | 25485145      | 96.492   |
| total |                | 708112      | 26411611      | 100.000  |

HPLC chromatogram of compound **3j** (99% ee)

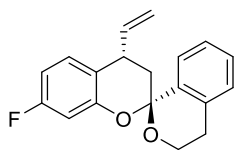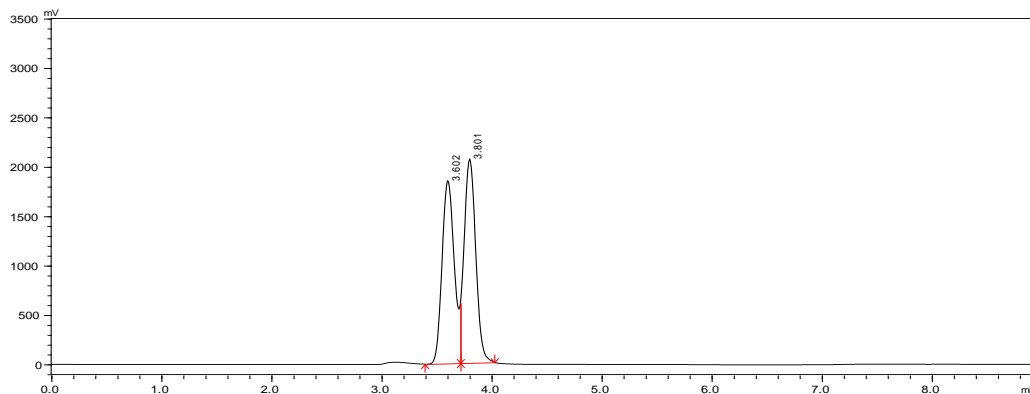

| #     | Ret Time (min) | Height (μV) | Area (μV.sec) | Area (%) |
|-------|----------------|-------------|---------------|----------|
| 1     | 3.602          | 1849602     | 14456177      | 49.081   |
| 2     | 3.801          | 2064089     | 14997823      | 50.919   |
| total |                | 3913691     | 29454000      | 100.000  |

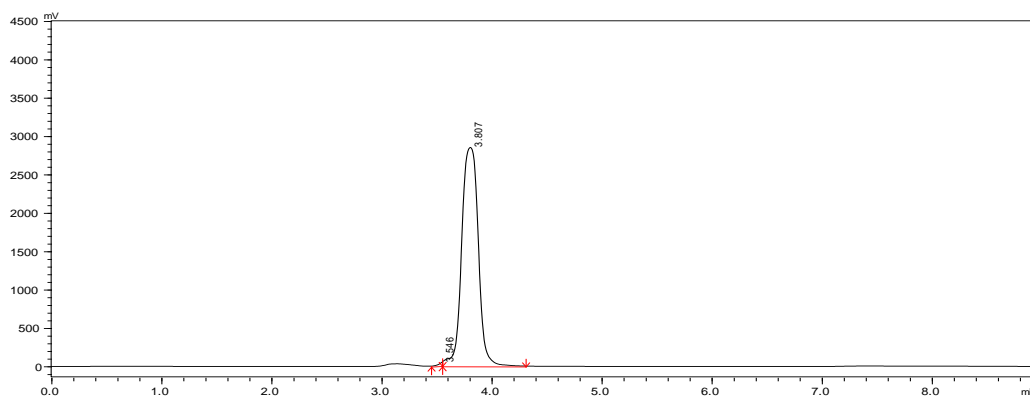

| #     | Ret Time (min) | Height (μV) | Area (μV.sec) | Area (%) |
|-------|----------------|-------------|---------------|----------|
| 1     | 3.546          | 42613       | 127266        | 0.423    |
| 2     | 3.807          | 2851304     | 29989093      | 99.577   |
| total |                | 2893917     | 30116360      | 100.000  |

HPLC chromatogram of compound **3k** (99% ee)

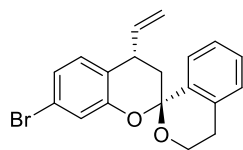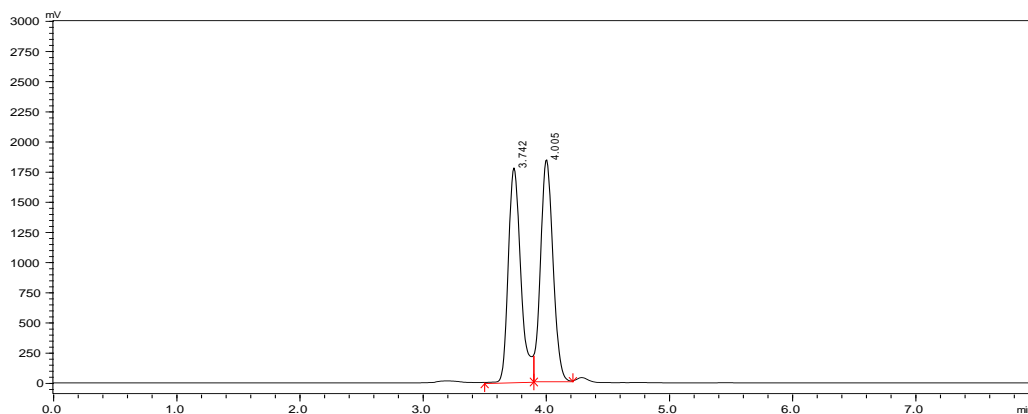

| #     | Ret Time (min) | Height (μV) | Area (μV.sec) | Area (%) |
|-------|----------------|-------------|---------------|----------|
| 1     | 3.742          | 1777039     | 12620764      | 49.493   |
| 2     | 4.005          | 1835084     | 12879314      | 50.507   |
| total |                | 3612124     | 25500079      | 100.000  |

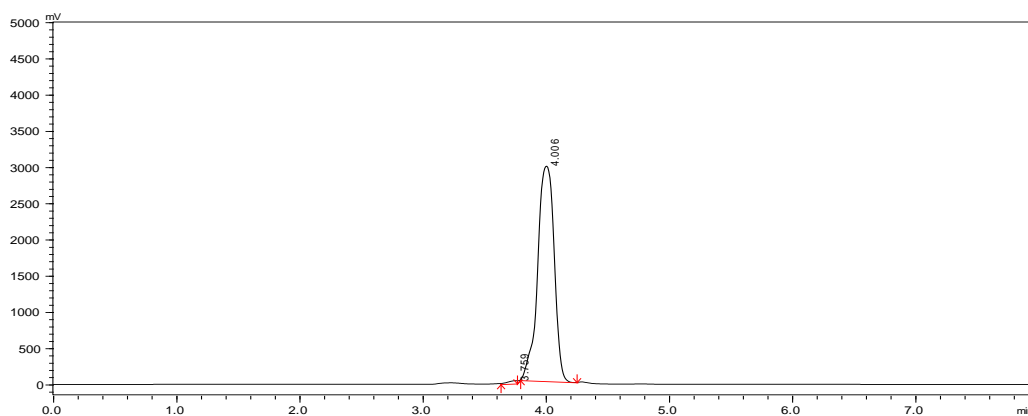

| #     | Ret Time (min) | Height (μV) | Area (μV.sec) | Area (%) |
|-------|----------------|-------------|---------------|----------|
| 1     | 3.759          | 36641       | 203995        | 0.731    |
| 2     | 4.006          | 2968195     | 27699897      | 99.269   |
| total |                | 3004836     | 27903892      | 100.000  |

HPLC chromatogram of compound **31** (99% ee, 14:1 dr)

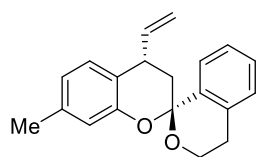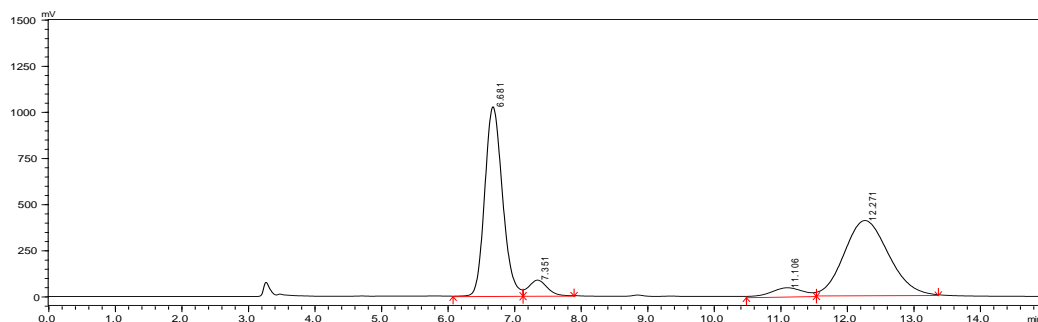

| #     | Ret Time (min) | Height (μV) | Area (μV.sec) | Area (%) |
|-------|----------------|-------------|---------------|----------|
| 1     | 6.681          | 1025229     | 18941758      | 46.183   |
| 2     | 7.351          | 84926       | 1625694       | 3.964    |
| 3     | 11.106         | 47668       | 1631201       | 3.977    |
| 4     | 12.271         | 405656      | 18815848      | 45.876   |
| total |                | 1563479     | 41014501      | 100.000  |

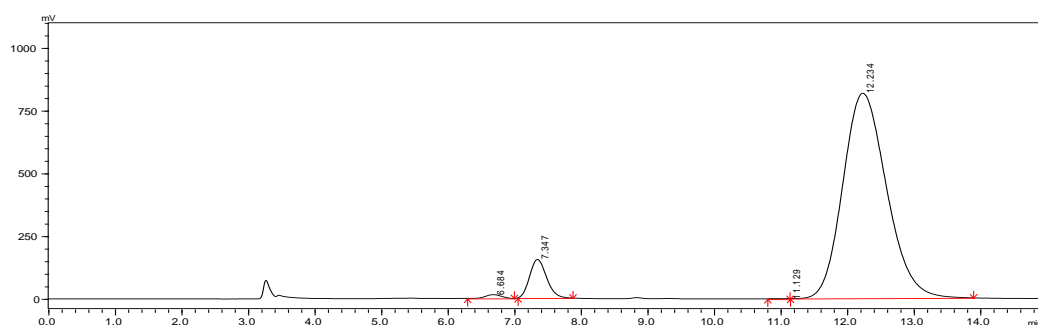

| #     | Ret Time (min) | Height (μV) | Area (μV.sec) | Area (%) |
|-------|----------------|-------------|---------------|----------|
| 1     | 6.684          | 15123       | 247421        | 0.614    |
| 2     | 7.347          | 153327      | 2699127       | 6.700    |
| 3     | 11.129         | 2676        | 27401         | 0.068    |
| 4     | 12.234         | 817447      | 37310067      | 92.618   |
| total |                | 988574      | 40284015      | 100.000  |

HPLC chromatogram of compound **3m** (98% ee)

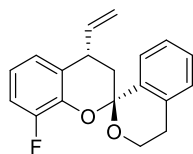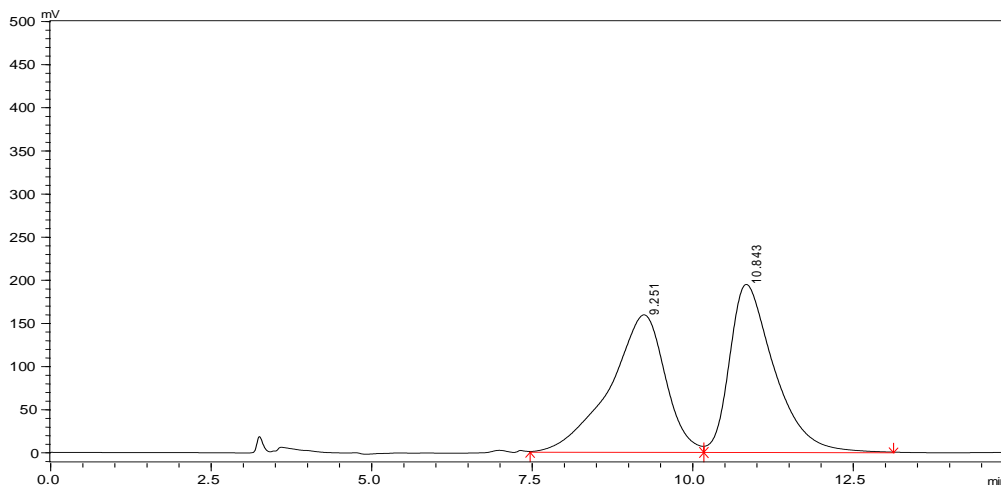

| #     | Ret Time (min) | Height (μV) | Area (μV.sec) | Area (%) |
|-------|----------------|-------------|---------------|----------|
| 1     | 9.251          | 158650      | 9459319       | 50.314   |
| 2     | 10.843         | 194062      | 9341224       | 49.686   |
| total |                | 352712      | 18800543      | 100.000  |

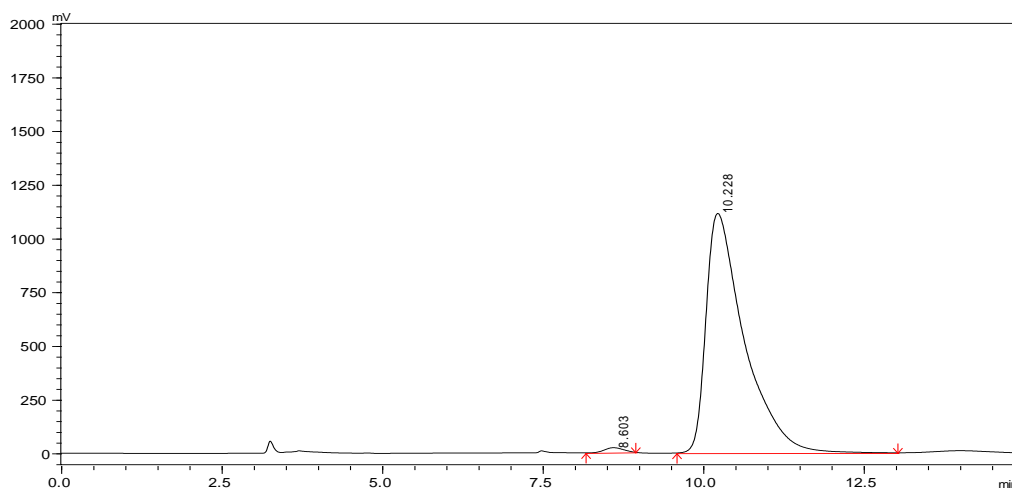

| #     | Ret Time (min) | Height (μV) | Area (μV.sec) | Area (%) |
|-------|----------------|-------------|---------------|----------|
| 1     | 8.603          | 22470       | 454995        | 0.979    |
| 2     | 10.228         | 1114651     | 46032714      | 99.021   |
| total |                | 1137121     | 46487709      | 100.000  |



HPLC chromatogram of compound **3n** (98% ee)

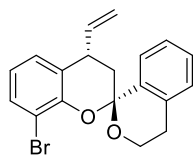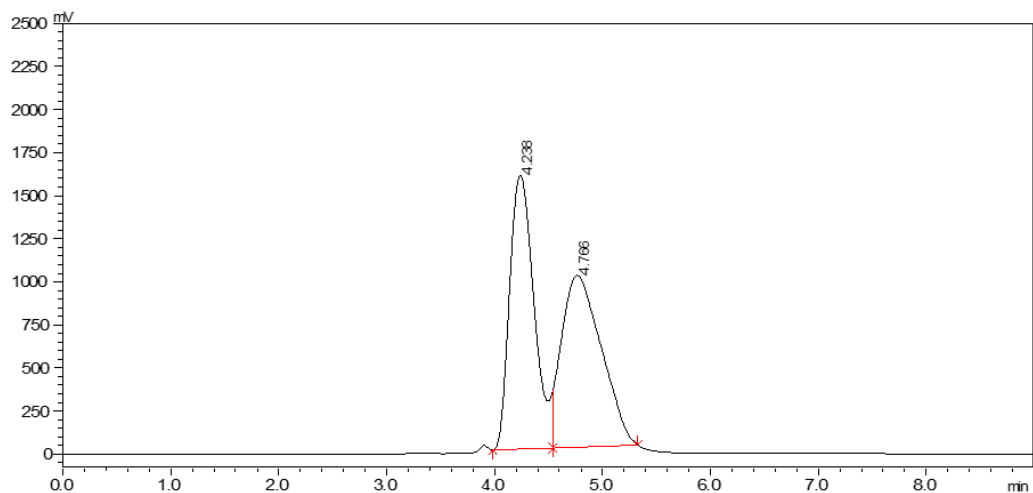

| #     | Ret Time (min) | Height (μV) | Area (μV.sec) | Area (%) |
|-------|----------------|-------------|---------------|----------|
| 1     | 4.238          | 1590301     | 25186460      | 49.260   |
| 2     | 4.766          | 996794      | 25942710      | 50.740   |
| total |                | 2587095     | 51129169      | 100.000  |

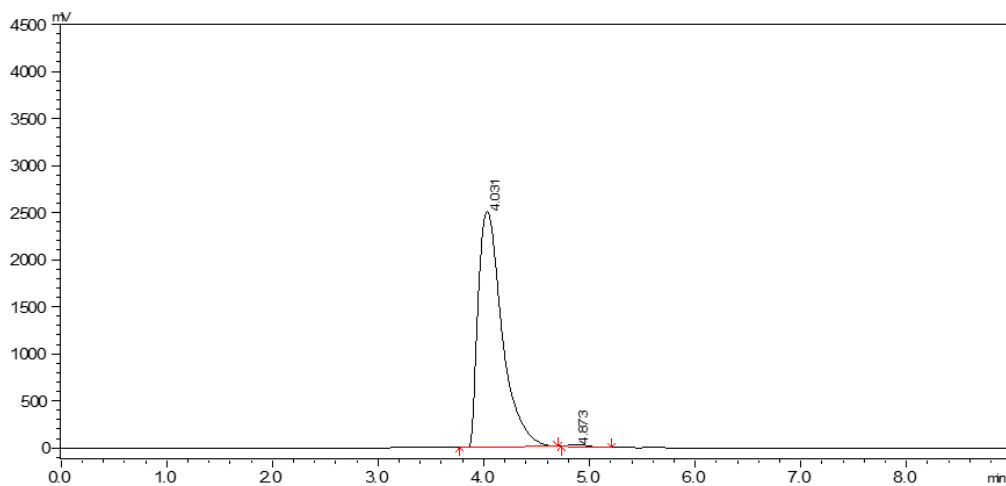

| #     | Ret Time (min) | Height (μV) | Area (μV.sec) | Area (%) |
|-------|----------------|-------------|---------------|----------|
| 1     | 4.031          | 2498044     | 39130218      | 99.241   |
| 2     | 4.873          | 27145       | 299444        | 0.759    |
| total |                | 2525188     | 39429662      | 100.000  |

HPLC chromatogram of compound **3o** (99% ee)

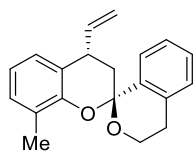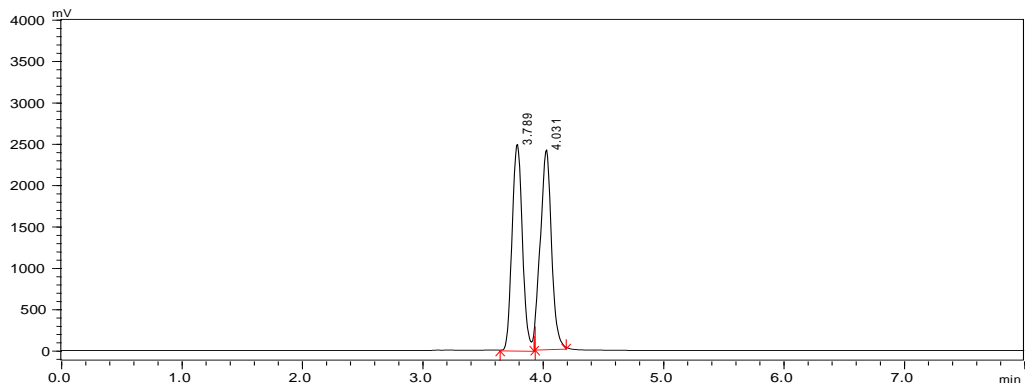

| #     | Ret Time (min) | Height ( $\mu$ V) | Area ( $\mu$ V.sec) | Area (%) |
|-------|----------------|-------------------|---------------------|----------|
| 1     | 3.789          | 2490962           | 15006166            | 49.371   |
| 2     | 4.031          | 2407221           | 15388414            | 50.629   |
| total |                | 4898183           | 30394580            | 100.000  |

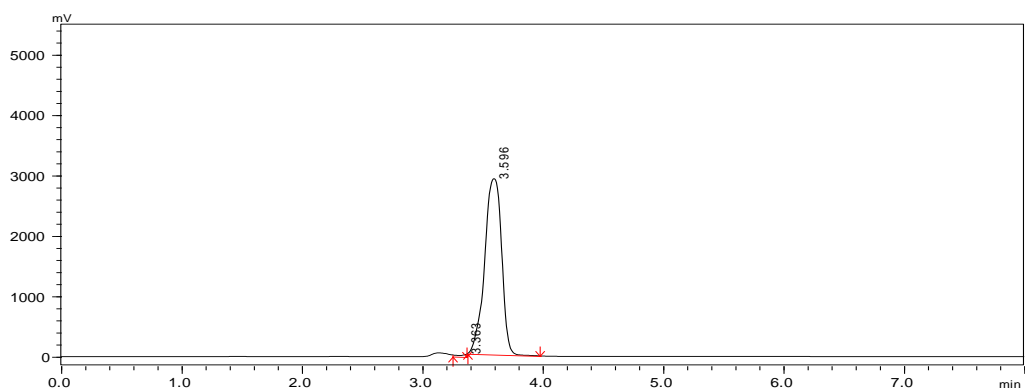

| #     | Ret Time (min) | Height ( $\mu$ V) | Area ( $\mu$ V.sec) | Area (%) |
|-------|----------------|-------------------|---------------------|----------|
| 1     | 3.363          | 36259             | 173693              | 0.605    |
| 2     | 3.596          | 2909865           | 28558912            | 99.395   |
| total |                | 2946123           | 28732605            | 100.000  |

HPLC chromatogram of compound **3p** (99% ee, 11:1 dr)

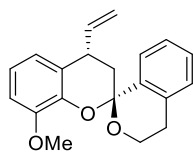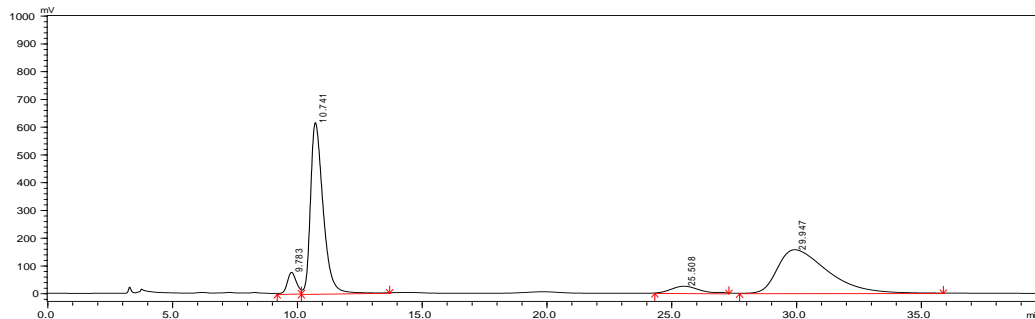

| #     | Ret Time (min) | Height (μV) | Area (μV.sec) | Area (%) |
|-------|----------------|-------------|---------------|----------|
| 1     | 9.783          | 77207       | 1925764       | 4.088    |
| 2     | 10.741         | 616554      | 21608259      | 45.865   |
| 3     | 25.508         | 24968       | 1925674       | 4.087    |
| 4     | 29.947         | 156608      | 21652605      | 45.960   |
| total |                | 875337      | 47112303      | 100.000  |

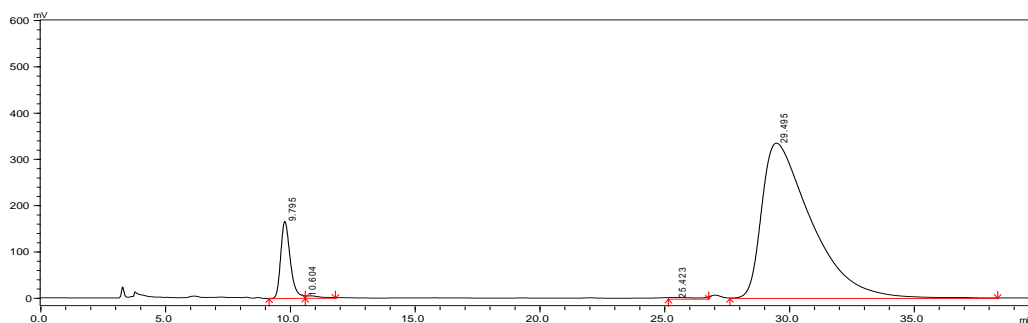

| #     | Ret Time (min) | Height (μV) | Area (μV.sec) | Area (%) |
|-------|----------------|-------------|---------------|----------|
| 1     | 9.795          | 165565      | 4355814       | 8.595    |
| 2     | 10.604         | 4128        | 153478        | 0.303    |
| 3     | 25.423         | 2474        | 198174        | 0.391    |
| 4     | 29.495         | 334498      | 45968192      | 90.711   |
| total |                | 506665      | 50675657      | 100.000  |

HPLC chromatogram of compound **3q** (91% ee, 17:1 dr)

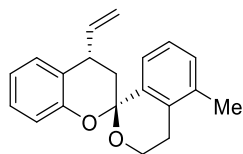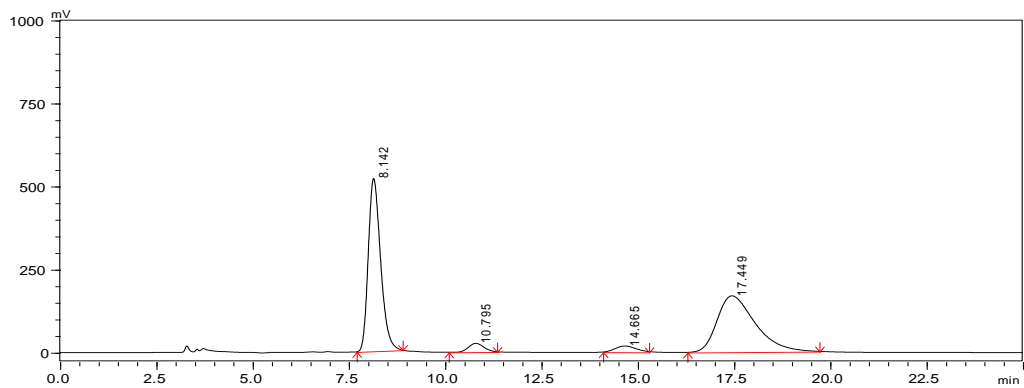

| #     | Ret Time (min) | Height ( $\mu$ V) | Area ( $\mu$ V.sec) | Area (%) |
|-------|----------------|-------------------|---------------------|----------|
| 1     | 8.142          | 520123            | 11604958            | 47.236   |
| 2     | 10.795         | 25814             | 703221              | 2.862    |
| 3     | 14.665         | 18278             | 681493              | 2.774    |
| 4     | 17.449         | 169182            | 11578410            | 47.128   |
| total |                | 733396            | 24568083            | 100.000  |

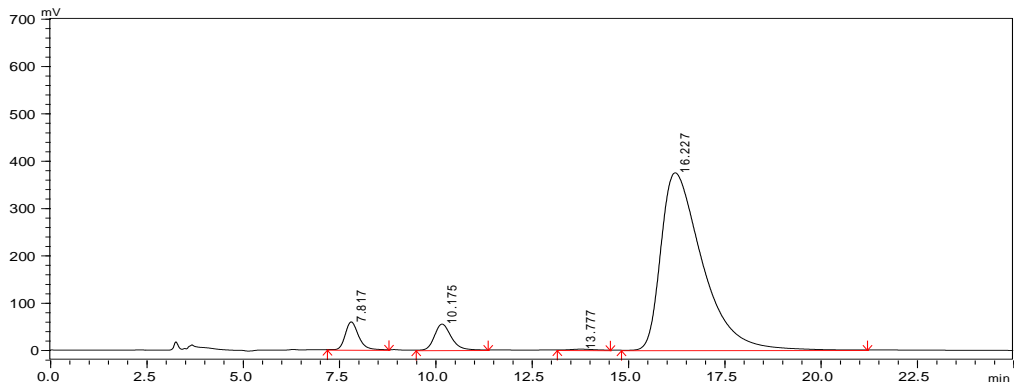

| #     | Ret Time (min) | Height ( $\mu$ V) | Area ( $\mu$ V.sec) | Area (%) |
|-------|----------------|-------------------|---------------------|----------|
| 1     | 7.817          | 58734             | 1388465             | 4.481    |
| 2     | 10.175         | 54852             | 1635813             | 5.279    |
| 3     | 13.777         | 1776              | 65877               | 0.213    |
| 4     | 16.227         | 374528            | 27895863            | 90.027   |
| total |                | 489890            | 30986018            | 100.000  |

HPLC chromatogram of compound **3r** (93% ee, 15:1 dr)

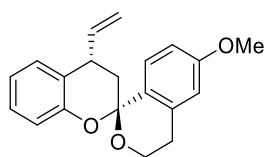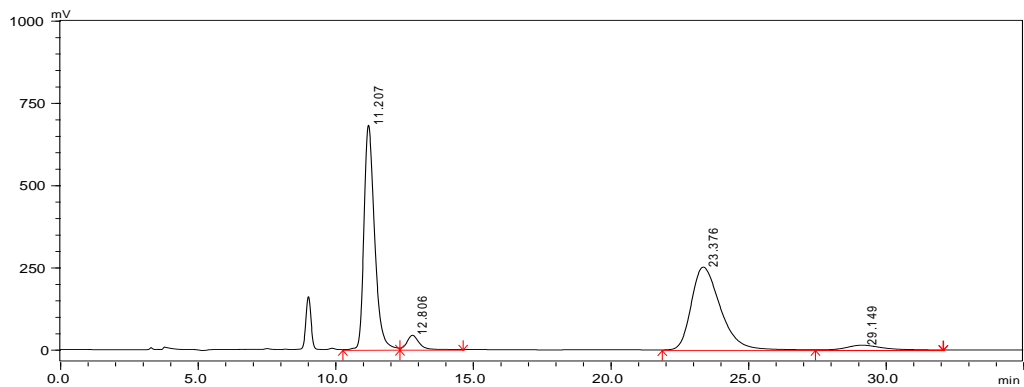

| #     | Ret Time (min) | Height ( $\mu$ V) | Area ( $\mu$ V.sec) | Area (%) |
|-------|----------------|-------------------|---------------------|----------|
| 1     | 11.207         | 682303            | 18295322            | 46.565   |
| 2     | 12.806         | 43600             | 1332342             | 3.391    |
| 3     | 23.376         | 251550            | 18434520            | 46.919   |
| 4     | 29.149         | 14369             | 1228064             | 3.126    |
| total |                | 991821            | 39290247            | 100.000  |

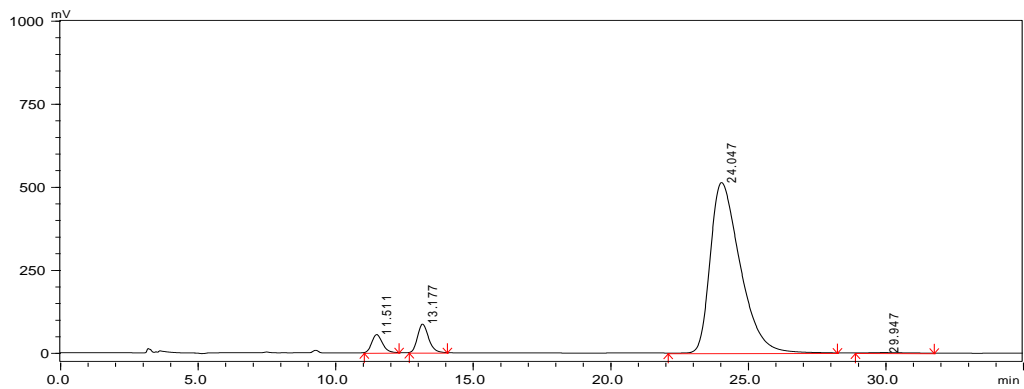

| #     | Ret Time (min) | Height ( $\mu$ V) | Area ( $\mu$ V.sec) | Area (%) |
|-------|----------------|-------------------|---------------------|----------|
| 1     | 11.511         | 54376             | 1453687             | 3.417    |
| 2     | 13.177         | 85774             | 2376027             | 5.585    |
| 3     | 24.047         | 512820            | 38625020            | 90.784   |
| 4     | 29.947         | 1203              | 91119               | 0.214    |
| total |                | 654173            | 42545852            | 100.000  |

HPLC chromatogram of compound **3s** (>99% ee)

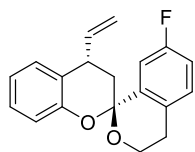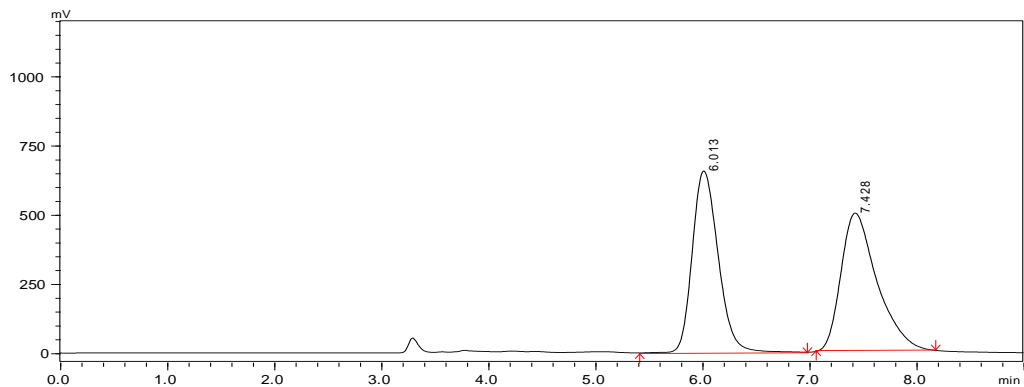

| #     | Ret Time (min) | Height (μV) | Area (μV.sec) | Area (%) |
|-------|----------------|-------------|---------------|----------|
| 1     | 6.013          | 656353      | 11056555      | 49.178   |
| 2     | 7.428          | 493887      | 11426329      | 50.822   |
| total |                | 1150240     | 22482885      | 100.000  |

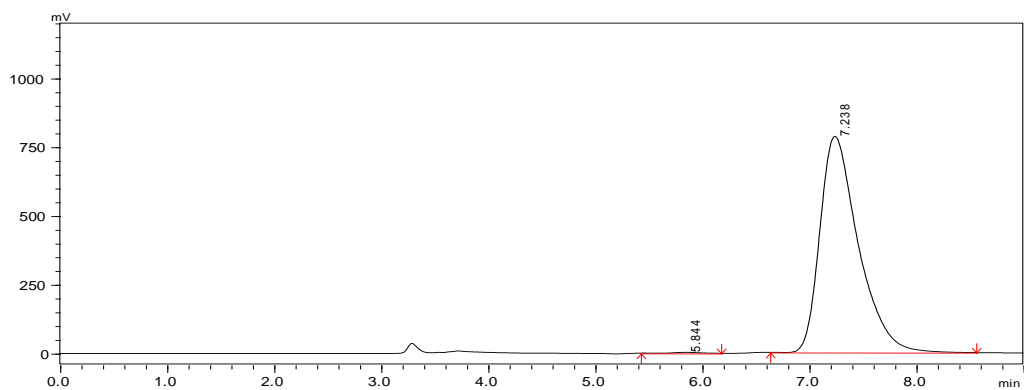

| #     | Ret Time (min) | Height (μV) | Area (μV.sec) | Area (%) |
|-------|----------------|-------------|---------------|----------|
| 1     | 5.844          | 2818        | 38860         | 0.198    |
| 2     | 7.238          | 785232      | 19560072      | 99.802   |
| total |                | 788050      | 19598932      | 100.000  |

HPLC chromatogram of compound **3t** (>99% ee)

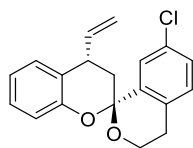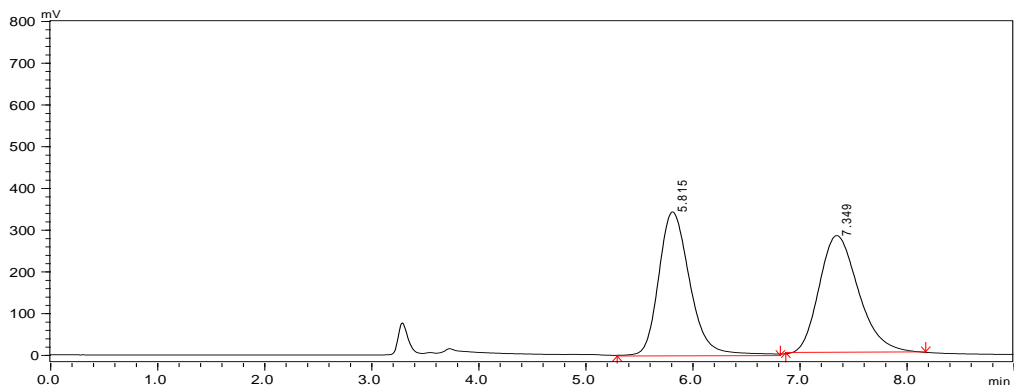

| #     | Ret Time (min) | Height (μV) | Area (μV.sec) | Area (%) |
|-------|----------------|-------------|---------------|----------|
| 1     | 5.815          | 343188      | 6904674       | 49.738   |
| 2     | 7.349          | 278027      | 6977353       | 50.262   |
| total |                | 621215      | 13882027      | 100.000  |

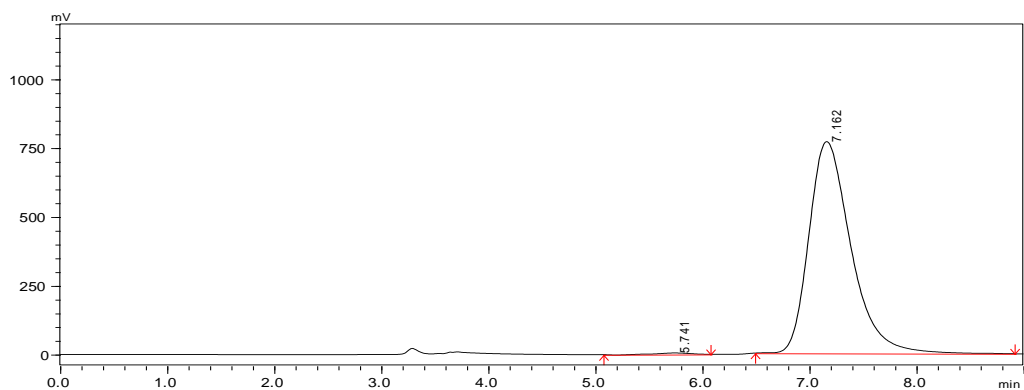

| #     | Ret Time (min) | Height (μV) | Area (μV.sec) | Area (%) |
|-------|----------------|-------------|---------------|----------|
| 1     | 5.741          | 5375        | 101772        | 0.483    |
| 2     | 7.162          | 768580      | 20972506      | 99.517   |
| total |                | 773955      | 21074278      | 100.000  |

HPLC chromatogram of compound **3u** (94% ee)

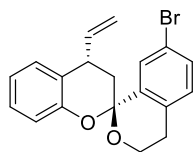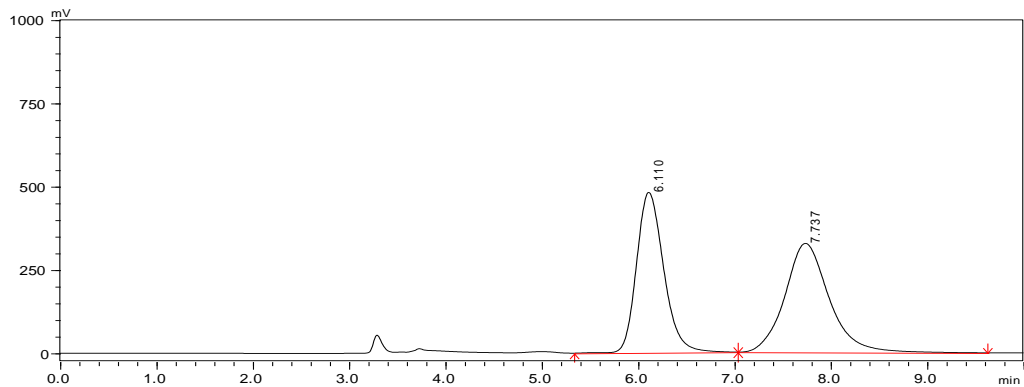

| #     | Ret Time (min) | Height (μV) | Area (μV.sec) | Area (%) |
|-------|----------------|-------------|---------------|----------|
| 1     | 6.110          | 480991      | 9432222       | 49.870   |
| 2     | 7.737          | 317383      | 9481363       | 50.130   |
| total |                | 798374      | 18913585      | 100.000  |

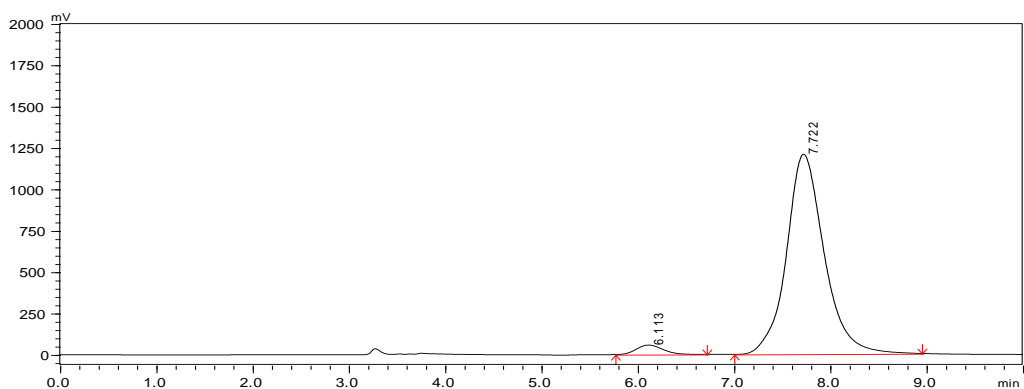

| #     | Ret Time (min) | Height (μV) | Area (μV.sec) | Area (%) |
|-------|----------------|-------------|---------------|----------|
| 1     | 6.113          | 57054       | 1092248       | 3.217    |
| 2     | 7.722          | 1207597     | 32860276      | 96.783   |
| total |                | 1264651     | 33952524      | 100.000  |



HPLC chromatogram of compound **3v** (>99% ee)

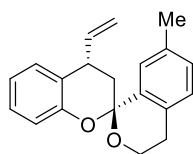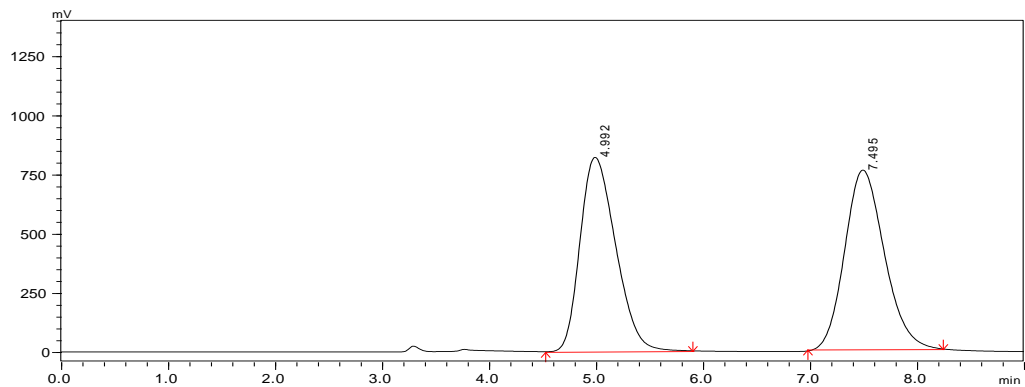

| #     | Ret Time (min) | Height ( $\mu$ V) | Area ( $\mu$ V.sec) | Area (%) |
|-------|----------------|-------------------|---------------------|----------|
| 1     | 4.992          | 819698            | 18939852            | 49.325   |
| 2     | 7.495          | 756125            | 19457968            | 50.675   |
| total |                | 1575823           | 38397821            | 100.000  |

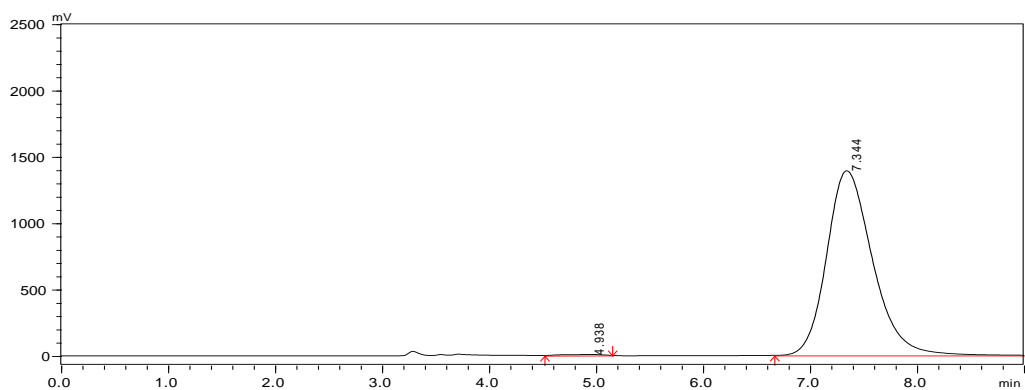

| #     | Ret Time (min) | Height ( $\mu$ V) | Area ( $\mu$ V.sec) | Area (%) |
|-------|----------------|-------------------|---------------------|----------|
| 1     | 4.938          | 7186              | 178229              | 0.429    |
| 2     | 7.344          | 1390785           | 41378581            | 99.571   |
| total |                | 1397972           | 41556810            | 100.000  |

HPLC chromatogram of compound **3w** (96% ee, 16:1 dr)

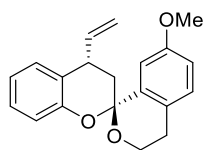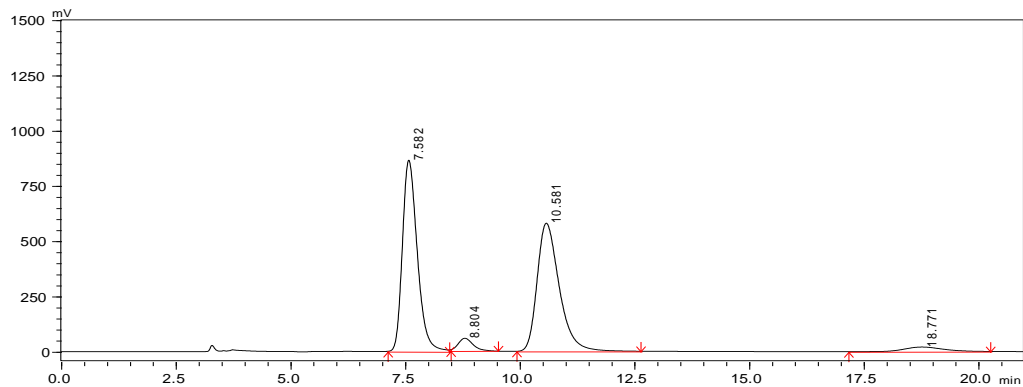

| #     | Ret Time (min) | Height (μV) | Area (μV.sec) | Area (%) |
|-------|----------------|-------------|---------------|----------|
| 1     | 7.582          | 865745      | 19533598      | 47.244   |
| 2     | 8.804          | 56353       | 1220830       | 2.953    |
| 3     | 10.581         | 579637      | 19405896      | 46.935   |
| 4     | 18.771         | 20393       | 1185830       | 2.868    |
| total |                | 1522127     | 41346154      | 100.000  |

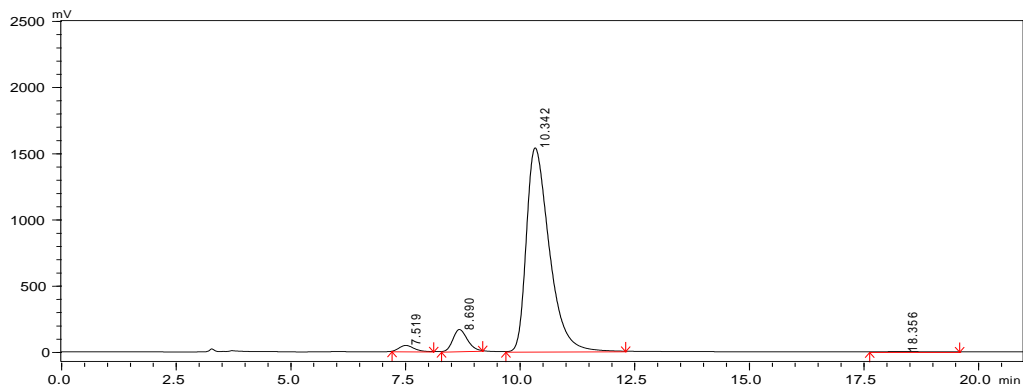

| #     | Ret Time (min) | Height (μV) | Area (μV.sec) | Area (%) |
|-------|----------------|-------------|---------------|----------|
| 1     | 7.519          | 44982       | 988333        | 1.706    |
| 2     | 8.690          | 163427      | 3508163       | 6.054    |
| 3     | 10.342         | 1538174     | 53374821      | 92.115   |
| 4     | 18.356         | 1257        | 72220         | 0.125    |
| total |                | 1747839     | 57943537      | 100.000  |

HPLC chromatogram of compound **5a** (99% ee, 6:1 dr)

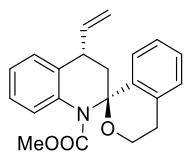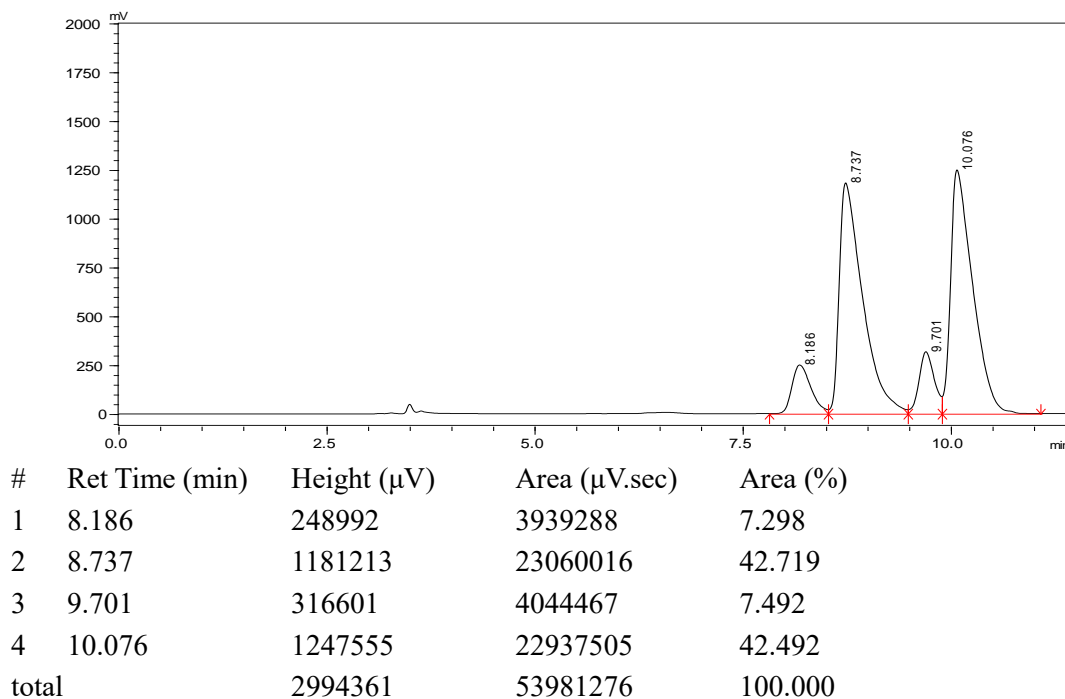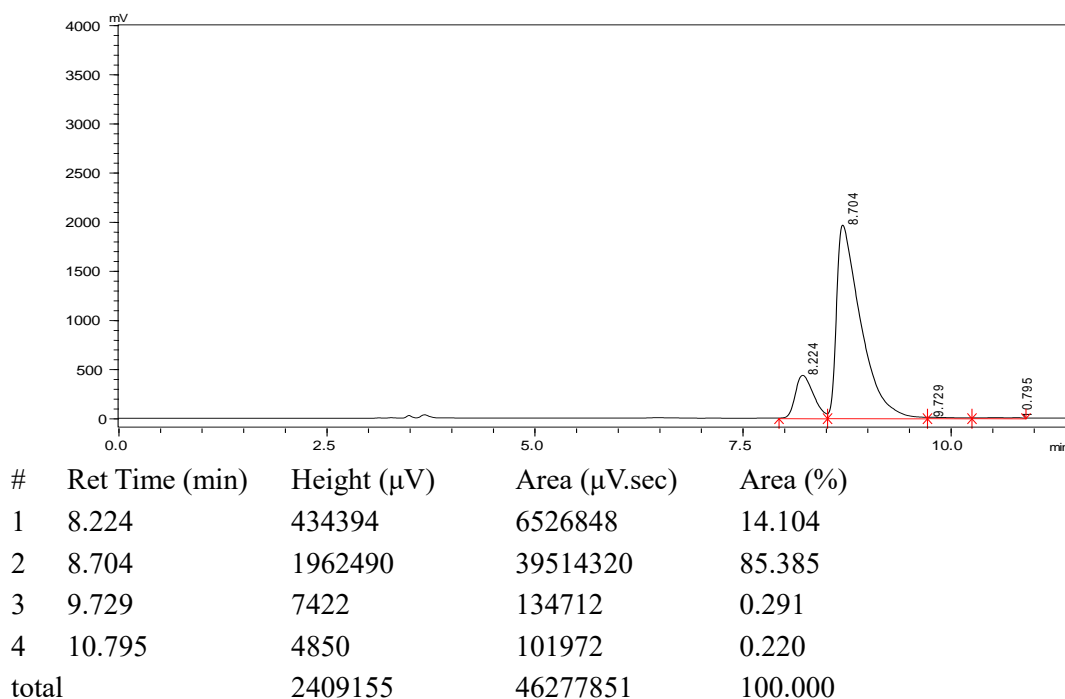

HPLC chromatogram of compound **5b** (99% ee, 6:1 dr)

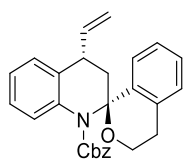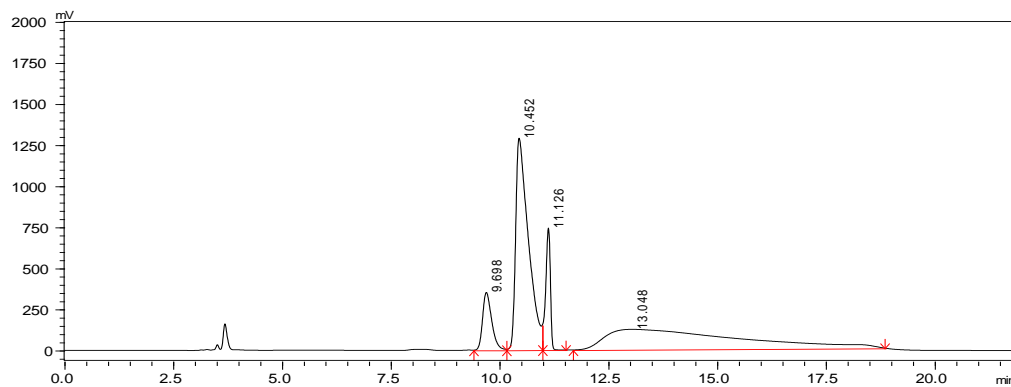

| #     | Ret Time (min) | Height (μV) | Area (μV.sec) | Area (%) |
|-------|----------------|-------------|---------------|----------|
| 1     | 9.698          | 351144      | 5085532       | 8.073    |
| 2     | 10.452         | 1289744     | 26244983      | 41.663   |
| 3     | 11.126         | 741930      | 5617986       | 8.918    |
| 4     | 13.048         | 123303      | 26044939      | 41.345   |
| total |                | 2506121     | 62993440      | 100.000  |

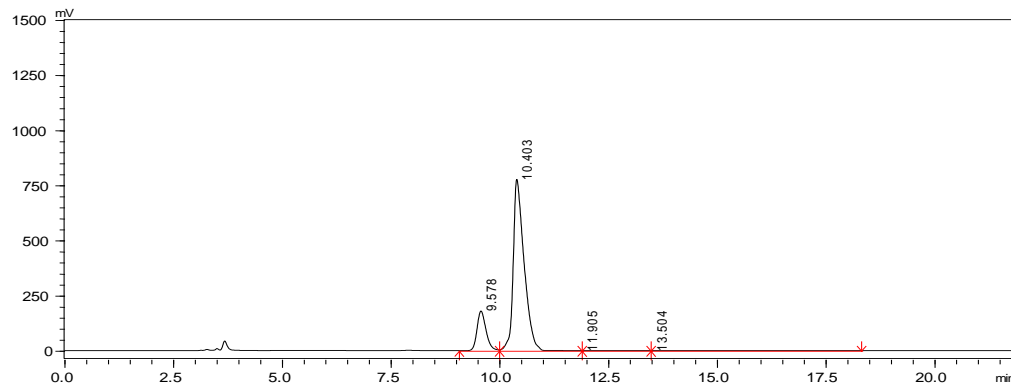

| #     | Ret Time (min) | Height (μV) | Area (μV.sec) | Area (%) |
|-------|----------------|-------------|---------------|----------|
| 1     | 9.578          | 180009      | 2598851       | 16.010   |
| 2     | 10.403         | 776960      | 13534900      | 83.379   |
| 3     | 11.905         | 458         | 36404         | 0.224    |
| 4     | 13.504         | 349         | 62893         | 0.387    |
| total |                | 957776      | 16233048      | 100.000  |

HPLC chromatogram of compound **5c** (99% ee, 4:1 dr)

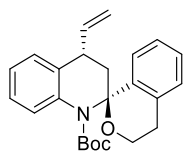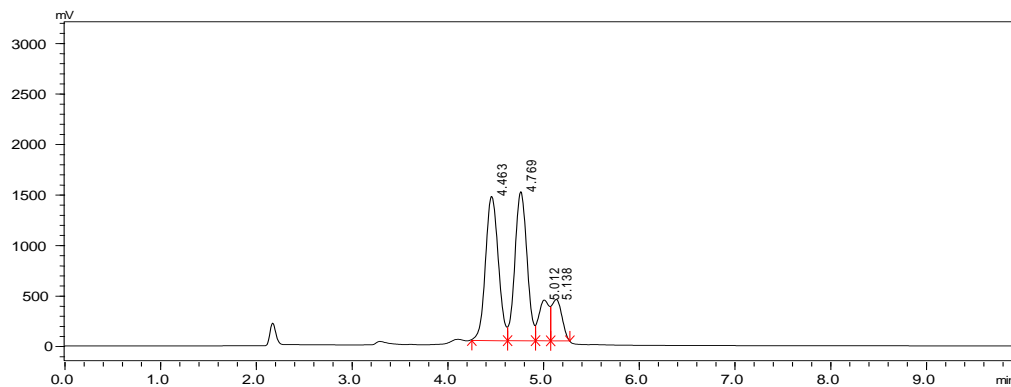

| #     | Ret Time (min) | Height ( $\mu\text{V}$ ) | Area ( $\mu\text{V}\cdot\text{sec}$ ) | Area (%) |
|-------|----------------|--------------------------|---------------------------------------|----------|
| 1     | 4.463          | 1420420                  | 13155510                              | 41.162   |
| 2     | 4.769          | 1468286                  | 12822704                              | 40.120   |
| 3     | 5.012          | 396610                   | 2996626                               | 9.376    |
| 4     | 5.138          | 403684                   | 2985784                               | 9.342    |
| total |                | 3689000                  | 31960625                              | 100.000  |

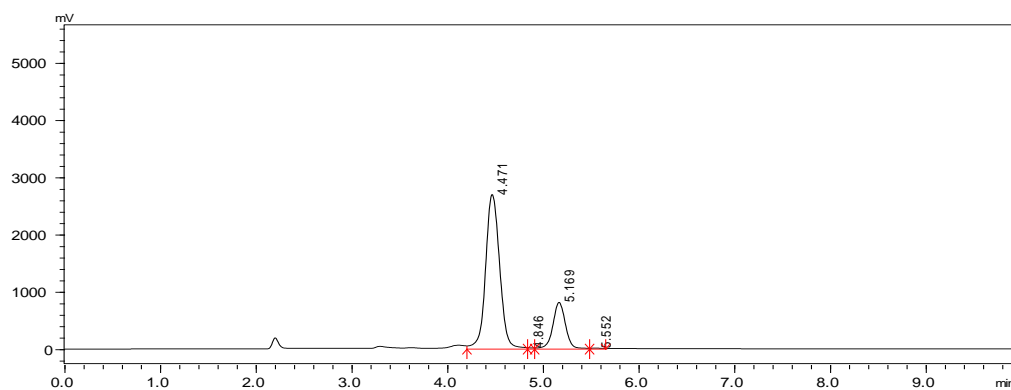

| #     | Ret Time (min) | Height ( $\mu\text{V}$ ) | Area ( $\mu\text{V}\cdot\text{sec}$ ) | Area (%) |
|-------|----------------|--------------------------|---------------------------------------|----------|
| 1     | 4.471          | 2688064                  | 27356214                              | 78.762   |
| 2     | 4.846          | 15225                    | 56231                                 | 0.162    |
| 3     | 5.169          | 806563                   | 7259850                               | 20.902   |
| 4     | 5.552          | 8303                     | 60341                                 | 0.174    |
| total |                | 3518155                  | 34732637                              | 100.000  |

HPLC chromatogram of compound **5d** (99% ee, 7:1 dr)

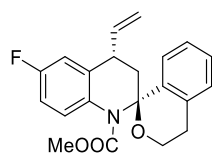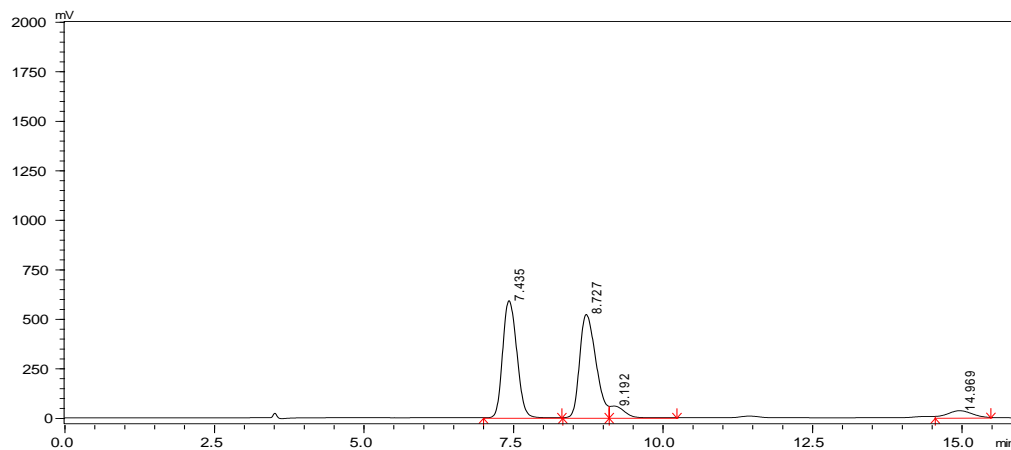

| #     | Ret Time (min) | Height (μV) | Area (μV.sec) | Area (%) |
|-------|----------------|-------------|---------------|----------|
| 1     | 7.435          | 591020      | 9721267       | 45.132   |
| 2     | 8.727          | 521327      | 9860443       | 45.778   |
| 3     | 9.192          | 59013       | 994963        | 4.619    |
| 4     | 14.969         | 34399       | 963051        | 4.471    |
| total |                | 1205758     | 21539724      | 100.000  |

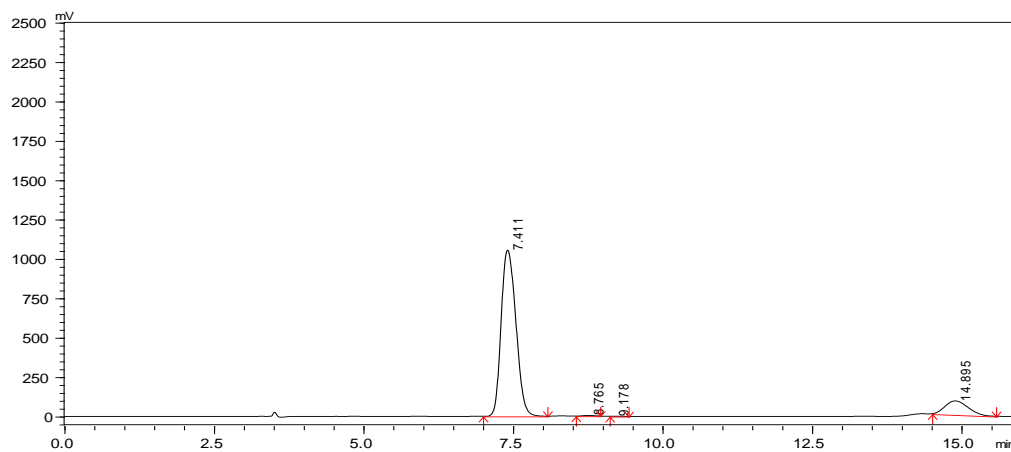

| #     | Ret Time (min) | Height (μV) | Area (μV.sec) | Area (%) |
|-------|----------------|-------------|---------------|----------|
| 1     | 7.411          | 1054371     | 18092488      | 88.301   |
| 2     | 8.765          | 4159        | 57321         | 0.280    |
| 3     | 9.178          | 506         | 5995          | 0.029    |
| 4     | 14.895         | 87659       | 2333644       | 11.389   |
| total |                | 1146694     | 20489449      | 100.000  |

HPLC chromatogram of compound **5e** (98% ee, 4:1 dr)

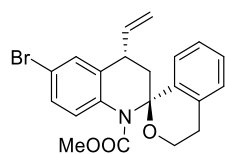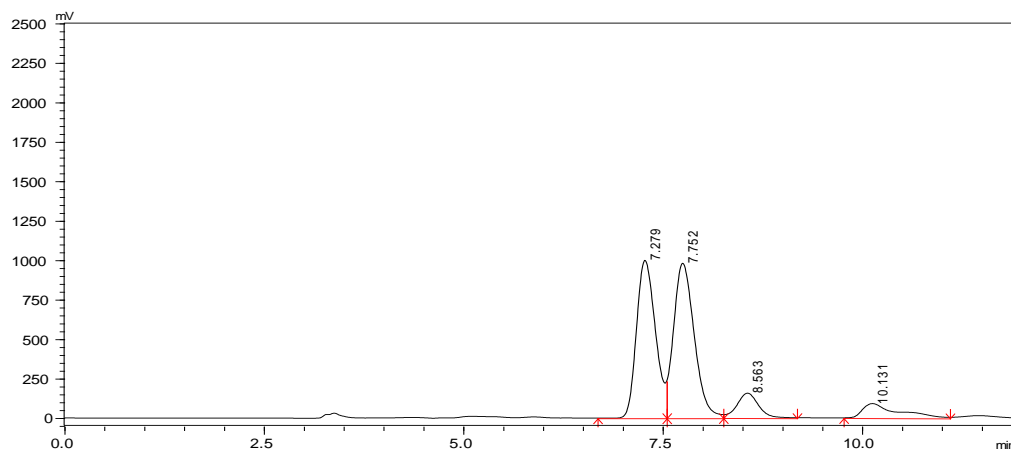

| #     | Ret Time (min) | Height ( $\mu\text{V}$ ) | Area ( $\mu\text{V}\cdot\text{sec}$ ) | Area (%) |
|-------|----------------|--------------------------|---------------------------------------|----------|
| 1     | 7.279          | 999182                   | 16611332                              | 41.512   |
| 2     | 7.752          | 981248                   | 17621811                              | 44.037   |
| 3     | 8.563          | 156744                   | 2933340                               | 7.330    |
| 4     | 10.131         | 91103                    | 2849456                               | 7.121    |
| total |                | 2228277                  | 40015939                              | 100.000  |

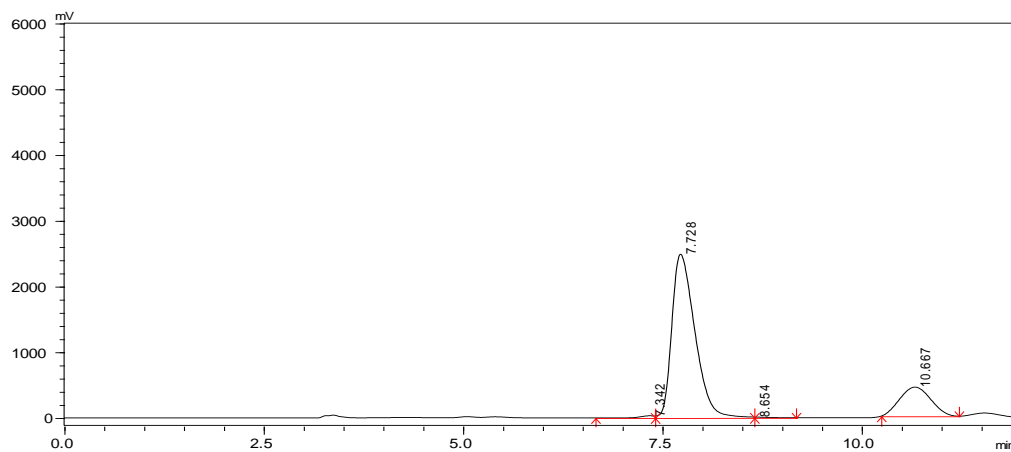

| #     | Ret Time (min) | Height ( $\mu\text{V}$ ) | Area ( $\mu\text{V}\cdot\text{sec}$ ) | Area (%) |
|-------|----------------|--------------------------|---------------------------------------|----------|
| 1     | 7.342          | 31483                    | 379313                                | 0.608    |
| 2     | 7.728          | 2487139                  | 49967390                              | 80.078   |
| 3     | 8.654          | 10859                    | 114205                                | 0.183    |
| 4     | 10.667         | 440975                   | 11937104                              | 19.131   |
| total |                | 2970455                  | 62398012                              | 100.000  |

HPLC chromatogram of compound **5f** (99% ee)

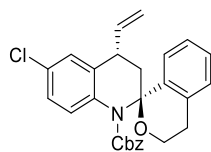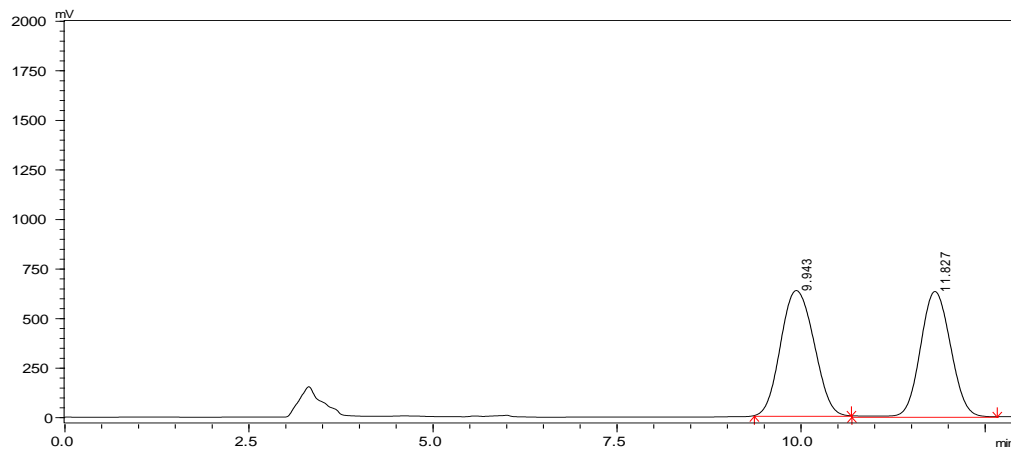

| #     | Ret Time (min) | Height (μV) | Area (μV.sec) | Area (%) |
|-------|----------------|-------------|---------------|----------|
| 1     | 9.943          | 631295      | 19886569      | 52.565   |
| 2     | 11.827         | 631609      | 17945995      | 47.435   |
| total |                | 1262904     | 37832563      | 100.000  |

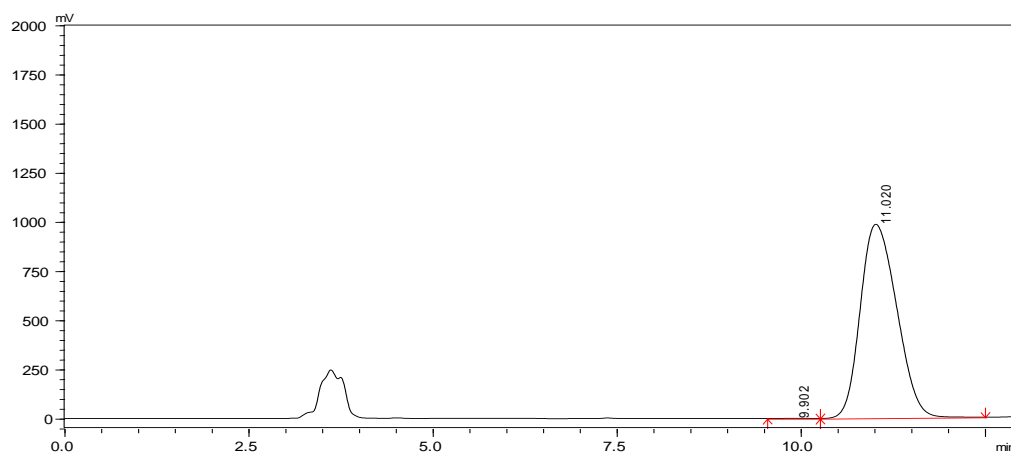

| #     | Ret Time (min) | Height (μV) | Area (μV.sec) | Area (%) |
|-------|----------------|-------------|---------------|----------|
| 1     | 9.902          | 518         | 8396          | 0.025    |
| 2     | 11.020         | 985111      | 33880161      | 99.975   |
| total |                | 985629      | 33888557      | 100.000  |



HPLC chromatogram of compound **5g** (99% ee)

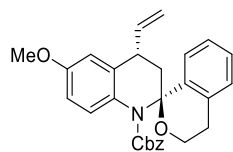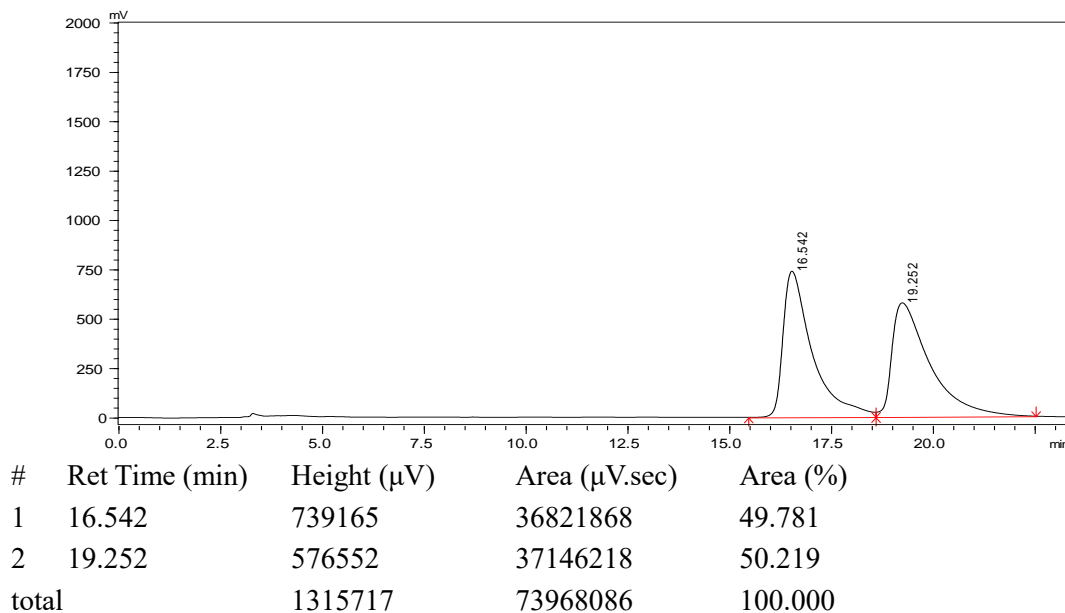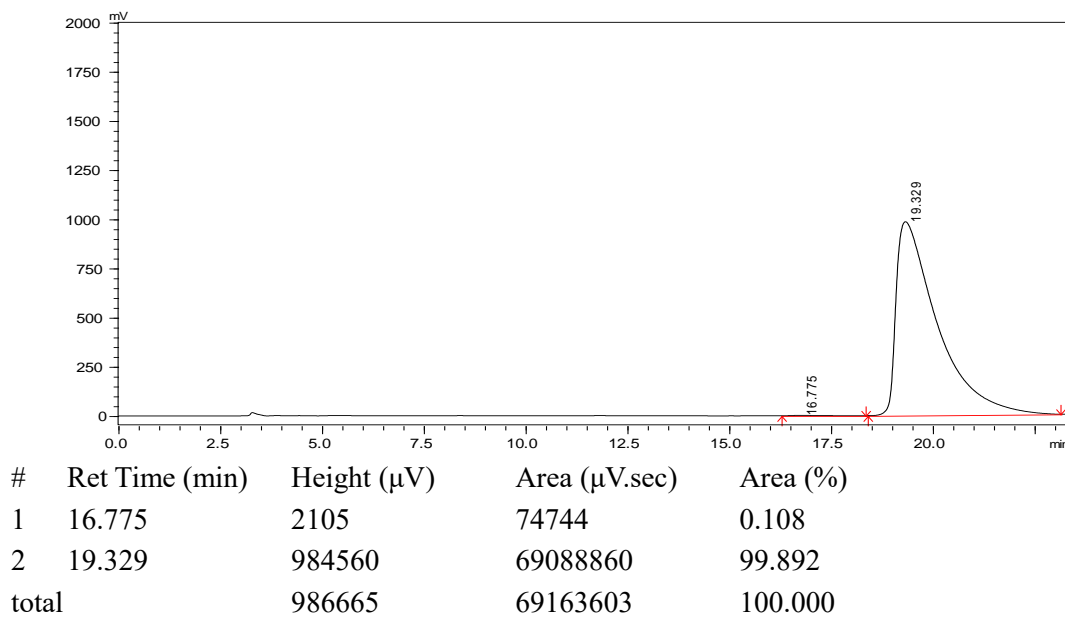

HPLC chromatogram of compound **5h** (99% ee, 10:1 dr)

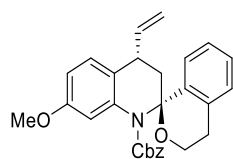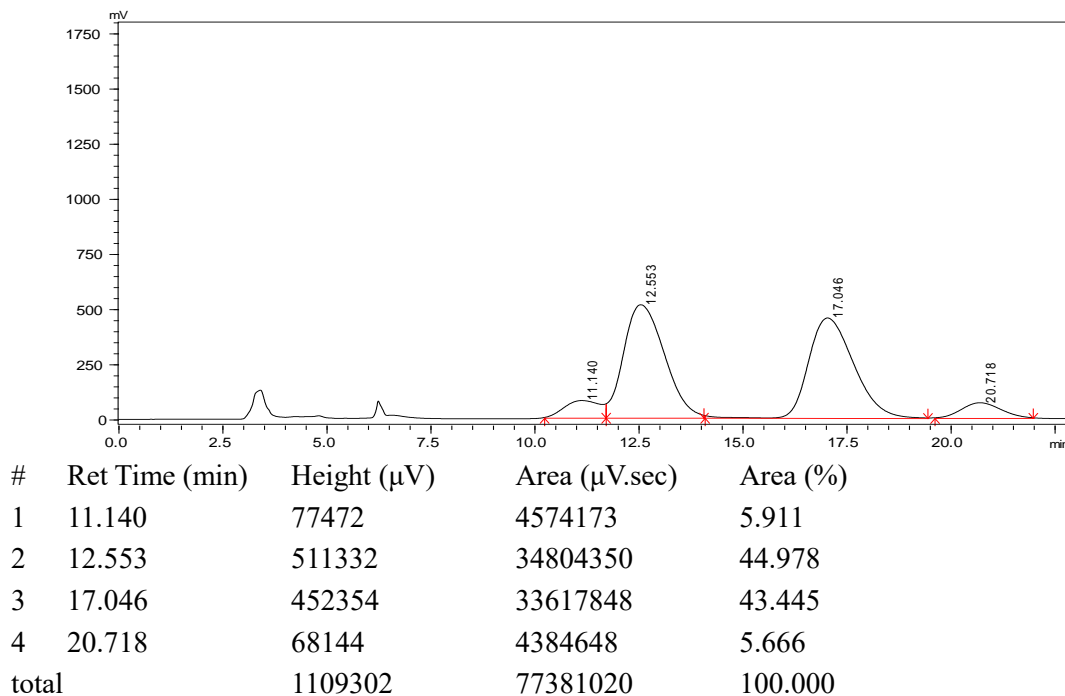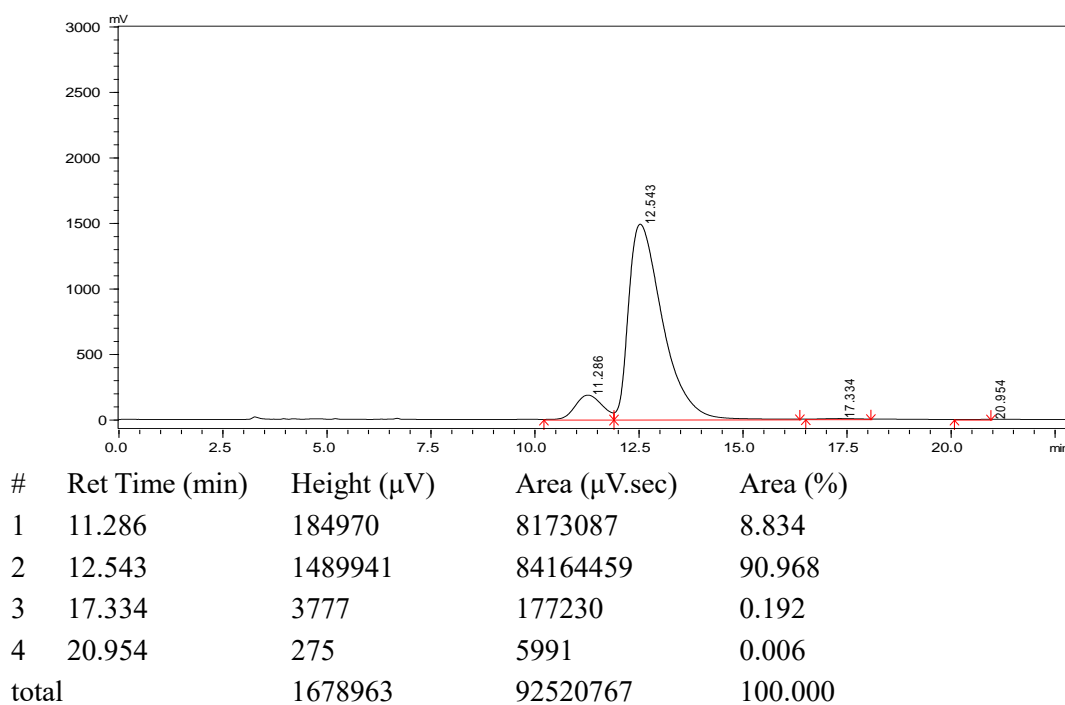

HPLC chromatogram of compound **5i** (99% ee, 5:1 dr)

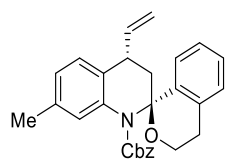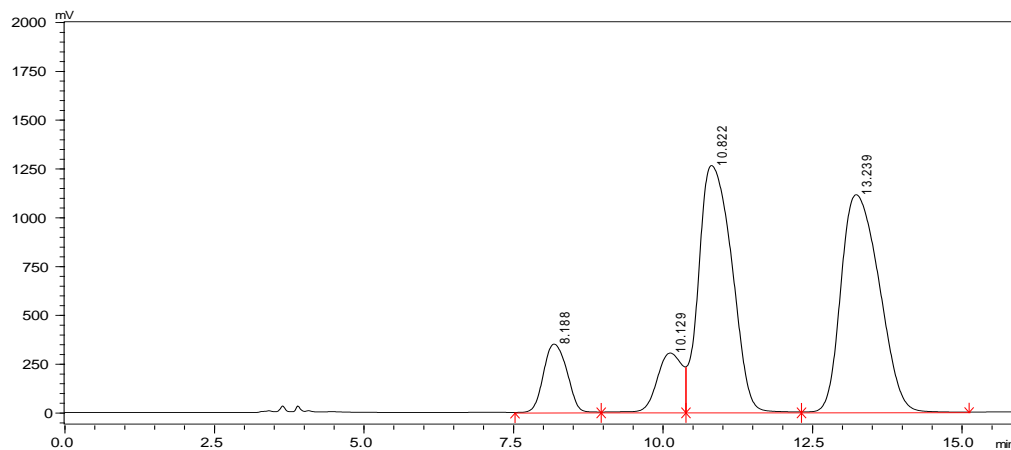

| #     | Ret Time (min) | Height (μV) | Area (μV.sec) | Area (%) |
|-------|----------------|-------------|---------------|----------|
| 1     | 8.188          | 349513      | 9490404       | 8.149    |
| 2     | 10.129         | 303325      | 8747137       | 7.510    |
| 3     | 10.822         | 1263120     | 48732265      | 41.842   |
| 4     | 13.239         | 1114022     | 49497452      | 42.499   |
| total |                | 3029980     | 116467258     | 100.000  |

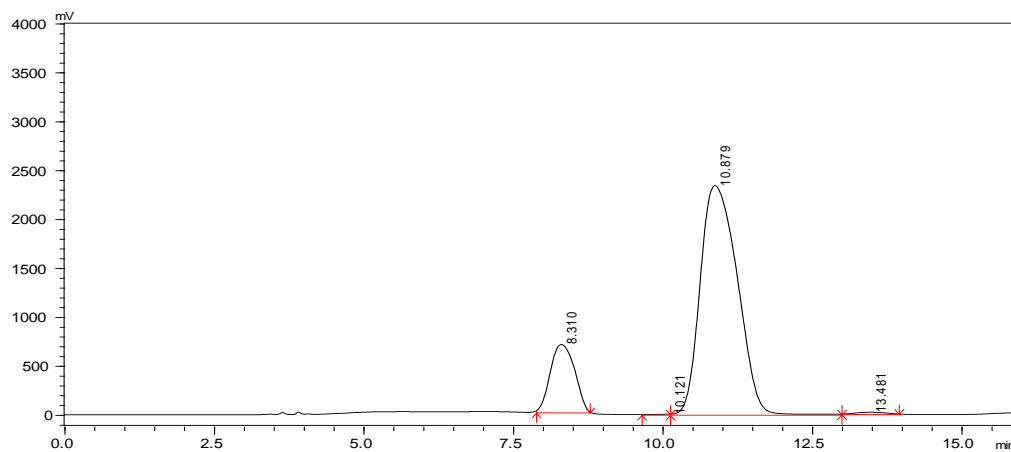

| #     | Ret Time (min) | Height (μV) | Area (μV.sec) | Area (%) |
|-------|----------------|-------------|---------------|----------|
| 1     | 8.310          | 693176      | 19603383      | 16.198   |
| 2     | 10.121         | 4885        | 52985         | 0.044    |
| 3     | 10.879         | 2339986     | 100791125     | 83.280   |
| 4     | 13.481         | 17992       | 578849        | 0.478    |
| total |                | 3056038     | 121026342     | 100.000  |

HPLC chromatogram of compound **5j** (99% ee, 6:1 dr)

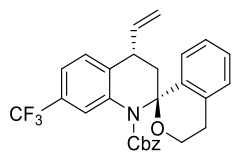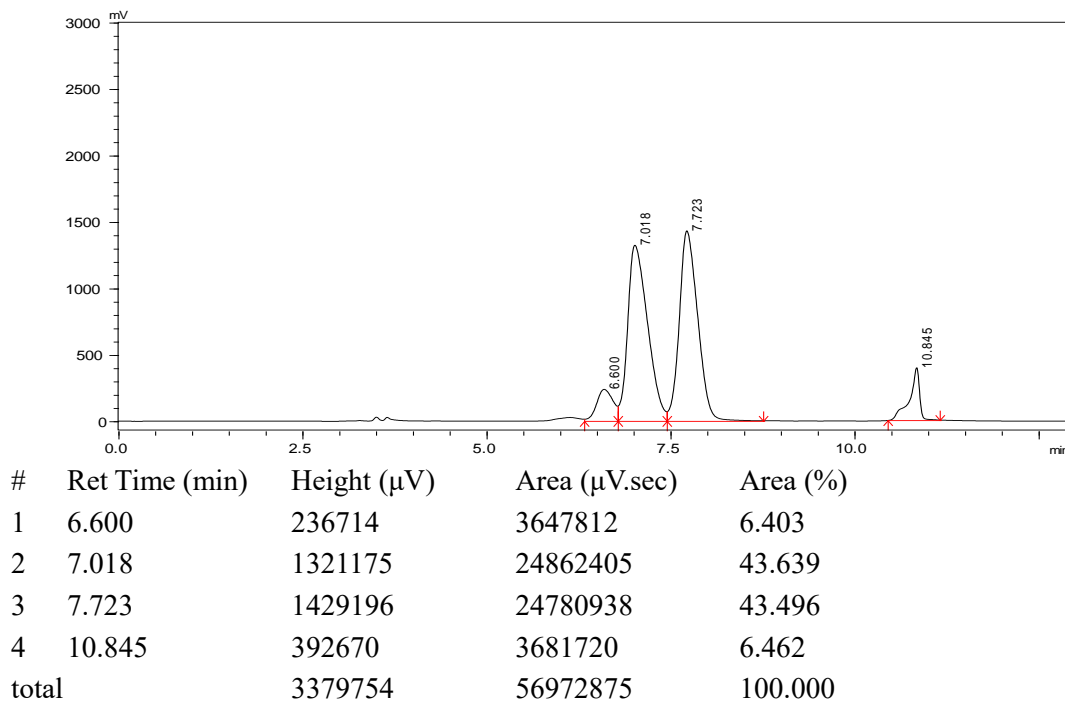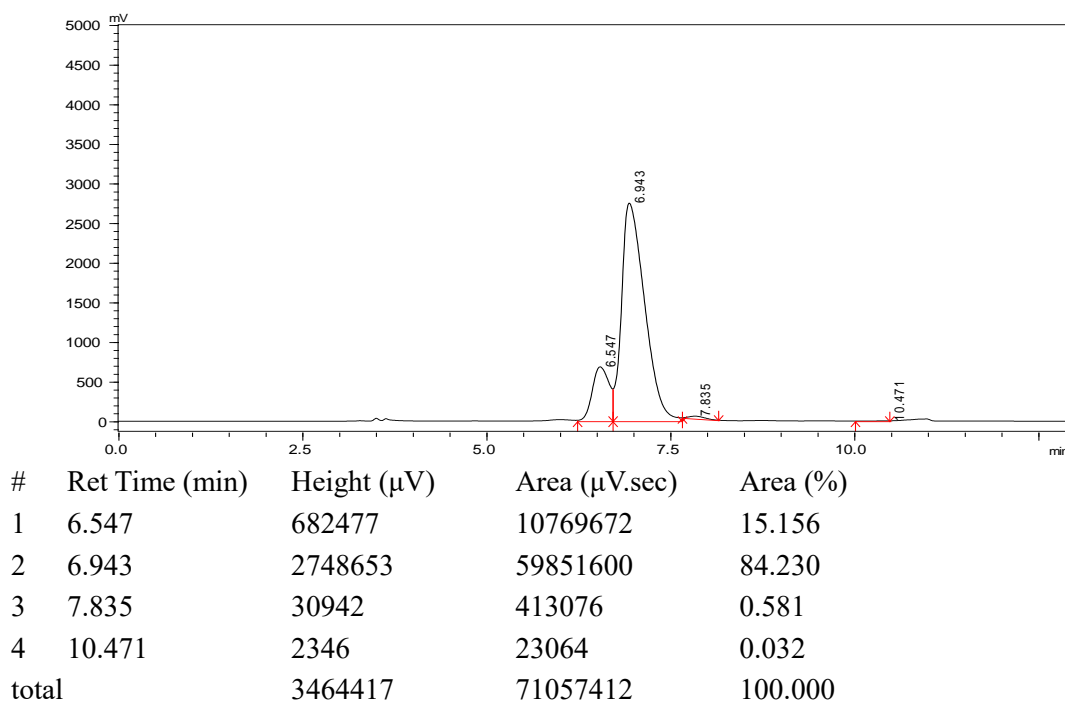

# HPLC chromatogram of compound **6** (95% ee)

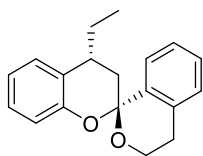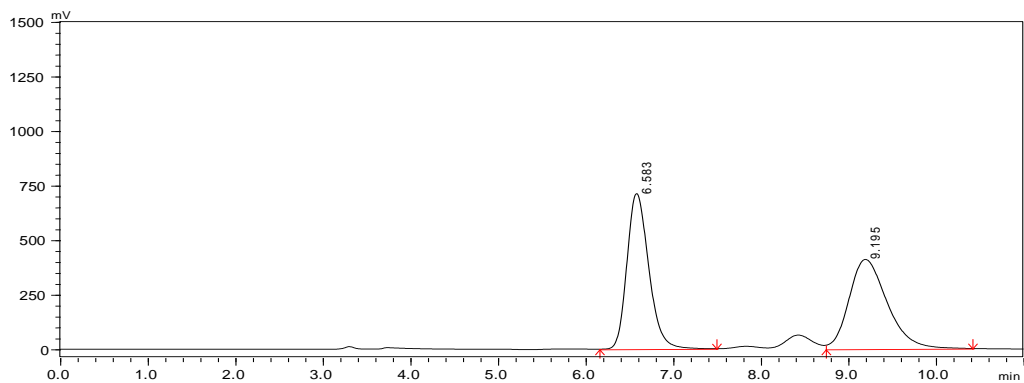

| #     | Ret Time (min) | Height (μV) | Area (μV.sec) | Area (%) |
|-------|----------------|-------------|---------------|----------|
| 1     | 6.583          | 712398      | 12321774      | 49.727   |
| 2     | 9.195          | 410815      | 12457021      | 50.273   |
| total |                | 1123213     | 24778794      | 100.000  |

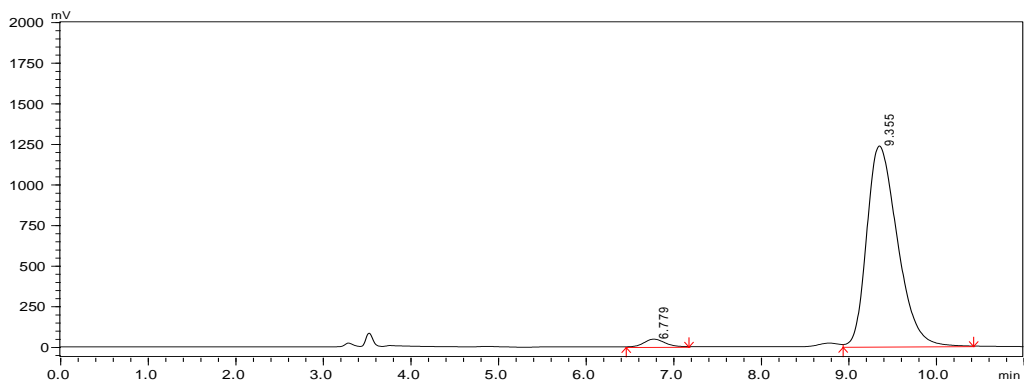

| #     | Ret Time (min) | Height (μV) | Area (μV.sec) | Area (%) |
|-------|----------------|-------------|---------------|----------|
| 1     | 6.779          | 46475       | 736244        | 2.393    |
| 2     | 9.355          | 1234772     | 30031829      | 97.607   |
| total |                | 1281247     | 30768073      | 100.000  |

HPLC chromatogram of compound **7** (98% ee)

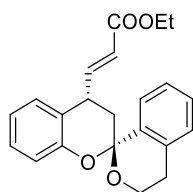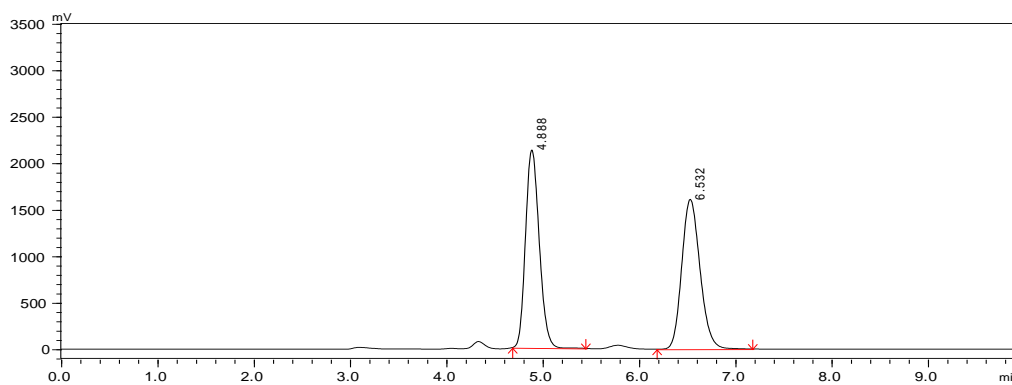

| #     | Ret Time (min) | Height (μV) | Area (μV.sec) | Area (%) |
|-------|----------------|-------------|---------------|----------|
| 1     | 4.888          | 2126824     | 21043754      | 49.796   |
| 2     | 6.532          | 1610059     | 21216299      | 50.204   |
| total |                | 3736883     | 42260053      | 100.000  |

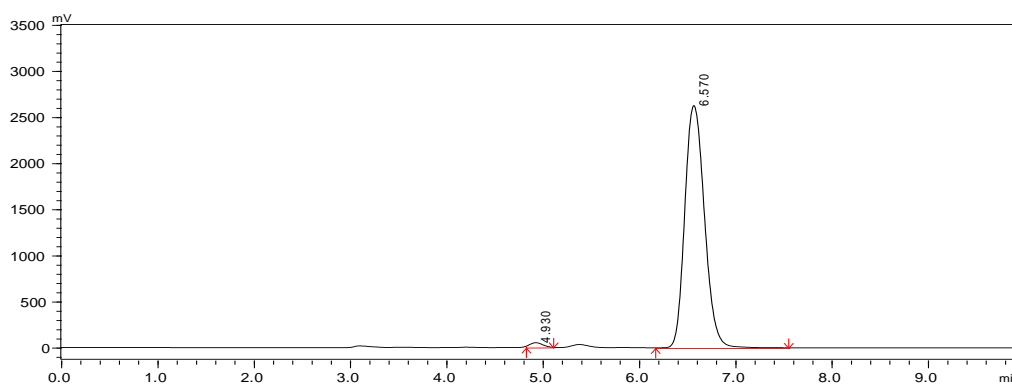

| #     | Ret Time (min) | Height (μV) | Area (μV.sec) | Area (%) |
|-------|----------------|-------------|---------------|----------|
| 1     | 4.930          | 50237       | 462967        | 1.227    |
| 2     | 6.570          | 2624985     | 37256381      | 98.773   |
| total |                | 2675222     | 37719347      | 100.000  |

HPLC chromatogram of compound **8** (99% ee)

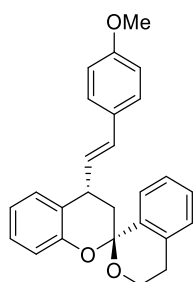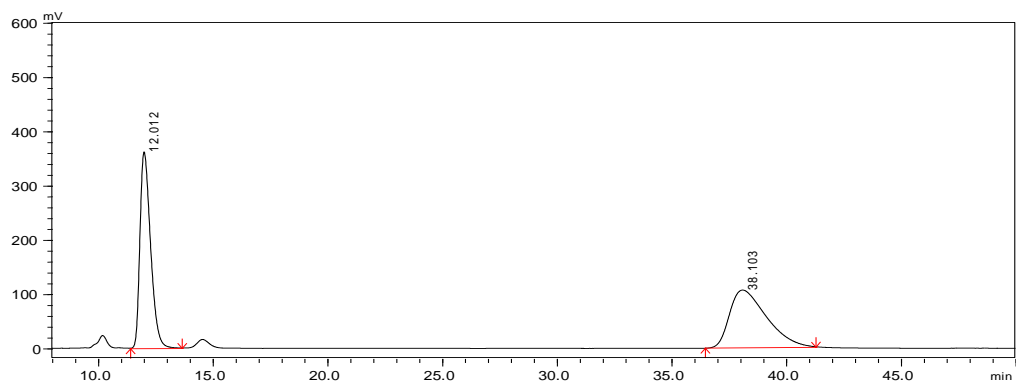

| #     | Ret Time (min) | Height (μV) | Area (μV.sec) | Area (%) |
|-------|----------------|-------------|---------------|----------|
| 1     | 12.012         | 361467      | 11604708      | 50.015   |
| 2     | 38.103         | 105248      | 11597734      | 49.985   |
| total |                | 466715      | 23202443      | 100.000  |

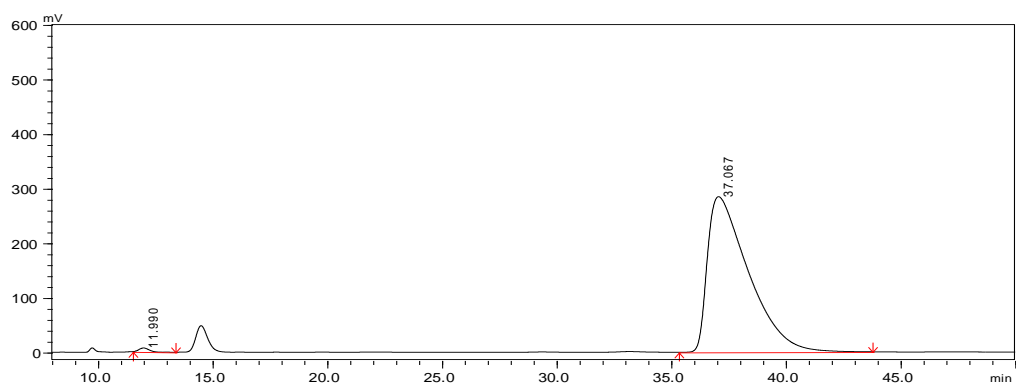

| #     | Ret Time (min) | Height (μV) | Area (μV.sec) | Area (%) |
|-------|----------------|-------------|---------------|----------|
| 1     | 11.990         | 7010        | 192279        | 0.540    |
| 2     | 37.067         | 284679      | 35419503      | 99.460   |
| total |                | 291689      | 35611782      | 100.000  |
